# Supplementary material for: Oaks drought-induced responses under root types: gene and microRNA cooperation
Source: Research Square preprint supplement (doi:10.21203/rs.3.rs-6584053/v1), 2025-05-14
Supplement: Supplementary file 4 [file 3fc6da56a8c5f87988a26e33.xlsx]

## Sheet: TR-DS_up-regulated
Gene	Annotation	log2FC
Qrob_T0152560.2		9.46
Qrob_T0721600.2	glutelin type-A 3-like	8.63
Qrob_T0438760.2	protein NRT1/ PTR FAMILY 7.3-like	8.4
Qrob_T0303310.2		7.57
Qrob_T0341310.2	premnaspirodiene oxygenase-like	7.21
Qrob_T0575520.2	cytochrome P450 76T24-like	7.03
Qrob_T0634260.2	ACT domain-containing protein ACR6-like, transcript variant X2	6.97
Qrob_T0123030.2	protein NRT1/ PTR FAMILY 7.3-like	6.73
Qrob_T0011610.2		6.6
Qrob_T0667620.2		6.48
Qrob_T0344340.2		6.18
Qrob_T0312550.2	polygalacturonase	6.1
Qrob_T0407270.2	thaumatin-like protein 1	5.93
Qrob_T0648980.2	kunitz trypsin inhibitor 5-like	5.91
Qrob_T0011620.2		5.83
Qrob_T0130820.2		5.83
Qrob_T0465930.2	putative RING-H2 finger protein ATL21A	5.81
Qrob_T0344350.2		5.8
Qrob_T0577790.2	iridoid synthase CYC2-like	5.68
Qrob_T0633060.2	early light-induced protein, chloroplastic-like	5.53
Qrob_T0649650.2	putative receptor protein kinase ZmPK1	5.48
Qrob_T0700410.2	ubiquitin carboxyl-terminal hydrolase 12, transcript variant X2	5.48
Qrob_T0546850.2	glutamine synthetase nodule isozyme	5.45
Qrob_T0243420.2	putative F-box protein At4g22180	5.4
Qrob_T0080140.2	COP1-interactive protein 1-like	5.37
Qrob_T0157210.2		5.37
Qrob_T0161400.2	heat shock 70 kDa protein	5.36
Qrob_T0380950.2		5.36
Qrob_T0002200.2		5.35
Qrob_T0291880.2	probable galactinol--sucrose galactosyltransferase 5	5.31
Qrob_T0628840.2		5.31
Qrob_T0236600.2	Fanconi anemia group J protein homolog, transcript variant X1	5.31
Qrob_T0276450.2		5.25
Qrob_T0147910.2		5.24
Qrob_T0374980.2	2-keto-3-deoxy-L-rhamnonate aldolase-like	5.23
Qrob_T0484030.2	RNA exonuclease 4	5.2
Qrob_T0059030.2		5.19
Qrob_T0582600.2		5.17
Qrob_T0419590.2	heat shock cognate 70 kDa protein 2-like	5.15
Qrob_T0648900.2		5.14
Qrob_T0180100.2		5.09
Qrob_T0219910.2		5.07
Qrob_T0240640.2	light-harvesting complex-like protein OHP1, chloroplastic	5.06
Qrob_T0273340.2		5.05
Qrob_T0064610.2	bifunctional endo-1,4-beta-xylanase XylA-like	5.05
Qrob_T0648940.2	kunitz trypsin inhibitor 5-like	5.04
Qrob_T0158020.2	auxin-responsive protein SAUR15-like	5.04
Qrob_T0387310.2	salicylate carboxymethyltransferase-like	4.97
Qrob_T0243440.2	putative F-box protein At4g22180	4.97
Qrob_T0387270.2	salicylate carboxymethyltransferase-like	4.94
Qrob_T0030740.2		4.92
Qrob_T0322250.2	alpha-amylase/subtilisin inhibitor-like	4.91
Qrob_T0139090.2		4.9
Qrob_T0618430.2		4.9
Qrob_T0742020.2	AP2/ERF and B3 domain-containing transcription factor At1g50680-like	4.89
Qrob_T0341060.2		4.88
Qrob_T0059950.2		4.69
Qrob_T0568290.2		4.68
Qrob_T0270990.2	myb-related protein 305-like	4.68
Qrob_T0015800.2	probable aldo-keto reductase 1	4.67
Qrob_T0154040.2	pectinesterase 2-like	4.67
Qrob_T0598470.2		4.66
Qrob_T0048920.2		4.66
Qrob_T0333770.2		4.64
Qrob_T0107870.2	protein DOG1-like 4	4.64
Qrob_T0745840.2		4.64
Qrob_T0321170.2		4.62
Qrob_T0473740.2		4.58
Qrob_T0125570.2		4.57
Qrob_T0648880.2	alpha-amylase/subtilisin inhibitor-like	4.56
Qrob_T0491230.2		4.56
Qrob_T0181140.2	wall-associated receptor kinase-like 10	4.56
Qrob_T0562310.2		4.56
Qrob_T0097030.2	putative UDP-rhamnose:rhamnosyltransferase 1	4.56
Qrob_T0436030.2	transcription factor MYB77-like	4.55
Qrob_T0604410.2	uncharacterized LOC115978309	4.51
Qrob_T0314140.2	protein LIFEGUARD 2-like	4.5
Qrob_T0045040.2	protein SRC2-like	4.45
Qrob_T0292550.2		4.44
Qrob_T0254830.2	methylecgonone reductase-like	4.42
Qrob_T0313030.2	pentatricopeptide repeat-containing protein At4g13650-like, transcript variant X5	4.42
Qrob_T0213060.2	putative receptor-like protein kinase At3g47110	4.41
Qrob_T0229660.2	E3 ubiquitin-protein ligase RNF181-like	4.4
Qrob_T0442350.2	cytochrome P450 CYP736A12-like, transcript variant X2	4.38
Qrob_T0199190.2	mediator of RNA polymerase II transcription subunit 37a-like	4.37
Qrob_T0448940.2	2-alkenal reductase (NADP(+)-dependent)-like	4.36
Qrob_T0215460.2	glutathione S-transferase F13-like	4.34
Qrob_T0516250.2	sugar transport protein 7-like	4.34
Qrob_T0609880.2	glyceraldehyde-3-phosphate dehydrogenase 2, cytosolic-like	4.34
Qrob_T0322230.2	alpha-amylase/subtilisin inhibitor-like	4.32
Qrob_T0275440.2	carboxylesterase 1-like	4.32
Qrob_T0057480.2	IAA-amino acid hydrolase ILR1-like 1	4.3
Qrob_T0392770.2	myrcene synthase, chloroplastic-like	4.29
Qrob_T0076120.2	replication protein A 70 kDa DNA-binding subunit A-like	4.28
Qrob_T0248380.2	scarecrow-like protein 14	4.25
Qrob_T0200850.2	RING-H2 finger protein ATL74-like	4.25
Qrob_T0617470.2		4.23
Qrob_T0091750.2		4.22
Qrob_T0039240.2	scarecrow-like protein 3, transcript variant X2	4.2
Qrob_T0166520.2	UDP-glycosyltransferase 83A1-like	4.2
Qrob_T0266310.2	cytochrome P450 81Q32-like	4.19
Qrob_T0064700.2	two-pore potassium channel 1-like	4.16
Qrob_T0057540.2		4.15
Qrob_T0688210.2		4.13
Qrob_T0058490.2		4.12
Qrob_T0124190.2	probable inositol oxygenase	4.11
Qrob_T0384270.2		4.05
Qrob_T0438770.2	protein NRT1/ PTR FAMILY 7.3-like	4.04
Qrob_T0162760.2	uncharacterized acetyltransferase At3g50280-like	4.03
Qrob_T0296270.2	cold-shock protein CS120-like	4.02
Qrob_T0491140.2	probable mannitol dehydrogenase, transcript variant X1	4.01
Qrob_T0162780.2	uncharacterized acetyltransferase At3g50280-like	4
Qrob_T0378040.2		4
Qrob_T0157010.2		4
Qrob_T0139860.2	ethylene-responsive transcription factor ERF086-like	3.99
Qrob_T0183960.2	protein BOBBER 1-like	3.99
Qrob_T0675580.2	geraniol 8-hydroxylase-like	3.98
Qrob_T0210820.2	LEAF RUST 10 DISEASE-RESISTANCE LOCUS RECEPTOR-LIKE PROTEIN KINASE-like 1.2	3.97
Qrob_T0746490.2	(-)-germacrene D synthase-like	3.94
Qrob_T0057490.2	IAA-amino acid hydrolase ILR1-like 1	3.93
Qrob_T0116140.2	protein DMR6-LIKE OXYGENASE 2-like	3.93
Qrob_T0297710.2	putative calcium-transporting ATPase 13, plasma membrane-type	3.93
Qrob_T0687410.2	nodulin-26-like	3.92
Qrob_T0491740.2	inositol oxygenase 1-like	3.91
Qrob_T0309980.2	FCS-Like Zinc finger 17-like	3.91
Qrob_T0486450.2	22.0 kDa class IV heat shock protein	3.88
Qrob_T0395830.2	cytochrome P450 81Q32-like	3.84
Qrob_T0584590.2	stem-specific protein TSJT1-like	3.84
Qrob_T0482790.2	60S ribosomal protein L22-2	3.83
Qrob_T0217700.2	uncharacterized LOC115994035	3.78
Qrob_T0464800.2	dehydration-responsive element-binding protein 1B-like	3.77
Qrob_T0648970.2	alpha-amylase/subtilisin inhibitor-like	3.77
Qrob_T0044130.2		3.76
Qrob_T0380550.2		3.75
Qrob_T0474890.2	chaperonin-like RBCX protein 1, chloroplastic	3.73
Qrob_T0322240.2	kunitz trypsin inhibitor 5-like	3.72
Qrob_T0391970.2		3.72
Qrob_T0509210.2	malate synthase, glyoxysomal, transcript variant X1	3.71
Qrob_T0215170.2		3.69
Qrob_T0291840.2	probable galactinol--sucrose galactosyltransferase 5	3.69
Qrob_T0130920.2		3.67
Qrob_T0745660.2	beta-glucosidase 12-like, transcript variant X2	3.66
Qrob_T0145410.2		3.66
Qrob_T0536480.2	nuclear poly(A) polymerase 1-like	3.65
Qrob_T0674840.2	GDSL esterase/lipase At4g10955-like	3.65
Qrob_T0266150.2	cytochrome P450 81Q32-like	3.63
Qrob_T0217670.2		3.63
Qrob_T0661600.2		3.62
Qrob_T0415530.2	cytochrome P450 76T24-like	3.62
Qrob_T0351460.2	7-deoxyloganetin glucosyltransferase-like	3.61
Qrob_T0347530.2	homeobox-leucine zipper protein HOX17-like	3.56
Qrob_T0127560.2	protein NUCLEAR FUSION DEFECTIVE 4	3.54
Qrob_T0223780.2	uncharacterized LOC115952553	3.52
Qrob_T0124110.2	probable inositol oxygenase	3.51
Qrob_T0752090.2	cytochrome P450 76T24-like	3.5
Qrob_T0144480.2	pentatricopeptide repeat-containing protein At1g31920, transcript variant X3	3.49
Qrob_T0682770.2	photosystem II core complex proteins psbY, chloroplastic	3.49
Qrob_T0403290.2	cytochrome P450 CYP82D47-like	3.47
Qrob_T0098500.2	cytochrome P450 81Q32-like	3.46
Qrob_T0432260.2	organic cation/carnitine transporter 3-like	3.46
Qrob_T0141990.2		3.45
Qrob_T0564040.2	patatin-like protein 2	3.43
Qrob_T0372670.2	low-temperature-induced 65 kDa protein, transcript variant X1	3.43
Qrob_T0395840.2	cytochrome P450 81Q32-like	3.41
Qrob_T0314110.2	1,2-dihydroxy-3-keto-5-methylthiopentene dioxygenase 1	3.41
Qrob_T0137860.2		3.4
Qrob_T0124130.2	probable inositol oxygenase	3.38
Qrob_T0027220.2		3.37
Qrob_T0415420.2	2-methylene-furan-3-one reductase-like, transcript variant X1	3.36
Qrob_T0124160.2	probable inositol oxygenase, transcript variant X1	3.35
Qrob_T0427470.2		3.33
Qrob_T0233460.2	pentatricopeptide repeat-containing protein At5g66520-like	3.32
Qrob_T0407330.2		3.31
Qrob_T0649090.2	flavonol sulfotransferase-like	3.31
Qrob_T0407230.2	thaumatin-like protein 1	3.31
Qrob_T0058350.2	TMV resistance protein N-like	3.29
Qrob_T0523180.2		3.28
Qrob_T0121150.2	class I heat shock protein-like	3.24
Qrob_T0539060.2		3.24
Qrob_T0316380.2	LEAF RUST 10 DISEASE-RESISTANCE LOCUS RECEPTOR-LIKE PROTEIN KINASE-like 1.2	3.23
Qrob_T0600640.2	nudix hydrolase 17, mitochondrial	3.22
Qrob_T0154240.2	non-functional pseudokinase ZED1-like, transcript variant X2	3.21
Qrob_T0625120.2	putative leucine-rich repeat receptor-like serine/threonine-protein kinase At2g19230, transcript variant X2	3.2
Qrob_T0136030.2		3.19
Qrob_T0415580.2	cytochrome P450 76T24-like	3.16
Qrob_T0768720.2		3.15
Qrob_T0642080.2	geraniol 8-hydroxylase-like	3.14
Qrob_T0393980.2	protein HIRA, transcript variant X2	3.14
Qrob_T0619110.2	F-box protein At2g27310-like	3.13
Qrob_T0287280.2	CCR4-NOT transcription complex subunit 1, transcript variant X5	3.12
Qrob_T0641650.2		3.1
Qrob_T0104240.2	uncharacterized LOC115982891	3.1
Qrob_T0083070.2	zinc finger CCCH domain-containing protein 2-like	3.09
Qrob_T0076950.2		3.09
Qrob_T0333610.2		3.08
Qrob_T0161460.2	eukaryotic translation initiation factor-like, transcript variant X1	3.07
Qrob_T0596260.2		3.06
Qrob_T0430240.2	peroxidase 3-like	3.04
Qrob_T0496000.2	dehydrin Xero 2-like	3.03
Qrob_T0001160.2	putative F-box protein At1g65770, transcript variant X2	3.01
Qrob_T0257240.2	uncharacterized LOC115975922	3.01
Qrob_T0352050.2	tubulin beta chain-like	2.99
Qrob_T0154010.2	pectinesterase 2-like	2.99
Qrob_T0252180.2		2.99
Qrob_T0237160.2	peroxidase 5-like	2.98
Qrob_T0329190.2		2.98
Qrob_T0611390.2		2.98
Qrob_T0137260.2	allene oxide synthase 3-like	2.97
Qrob_T0010710.2	allene oxide synthase 3-like	2.96
Qrob_T0107060.2	calvin cycle protein CP12-1, chloroplastic	2.96
Qrob_T0215420.2	protein SRC2 homolog	2.96
Qrob_T0036440.2	7-deoxyloganetin glucosyltransferase-like	2.95
Qrob_T0134640.2		2.95
Qrob_T0309990.2	FCS-Like Zinc finger 17-like	2.95
Qrob_T0025790.2		2.95
Qrob_T0004330.2	probable inositol transporter 2	2.93
Qrob_T0745850.2		2.91
Qrob_T0758580.2		2.91
Qrob_T0483590.2	calcineurin B-like protein 10, transcript variant X1	2.9
Qrob_T0190440.2		2.9
Qrob_T0388280.2		2.89
Qrob_T0088650.2	heat stress transcription factor A-3, transcript variant X1	2.87
Qrob_T0372650.2		2.85
Qrob_T0390960.2		2.83
Qrob_T0512970.2		2.83
Qrob_T0666340.2		2.82
Qrob_T0587190.2	probable F-box protein At4g22030	2.82
Qrob_T0082290.2	transcription factor MYB108	2.81
Qrob_T0310740.2	putative disease resistance RPP13-like protein 1	2.81
Qrob_T0416920.2	ribonuclease 3-like	2.81
Qrob_T0387290.2		2.8
Qrob_T0123020.2	protein NRT1/ PTR FAMILY 7.3-like	2.78
Qrob_T0751690.2	mediator of RNA polymerase II transcription subunit 33A-like	2.78
Qrob_T0116150.2	protein DMR6-LIKE OXYGENASE 2-like	2.77
Qrob_T0676060.2		2.77
Qrob_T0531830.2		2.77
Qrob_T0562490.2		2.77
Qrob_T0059780.2	probable isoaspartyl peptidase/L-asparaginase 2	2.76
Qrob_T0540340.2	MLP-like protein 43	2.76
Qrob_T0090610.2	beta-fructofuranosidase, insoluble isoenzyme 1-like	2.75
Qrob_T0418630.2	glutathione transferase GST 23-like	2.75
Qrob_T0070350.2	salutaridine reductase-like	2.75
Qrob_T0517630.2	uncharacterized LOC115976116, transcript variant X1	2.74
Qrob_T0001420.2	F-box protein At4g18380-like	2.73
Qrob_T0296280.2		2.72
Qrob_T0555580.2	pentatricopeptide repeat-containing protein At5g61370, mitochondrial, transcript variant X3	2.72
Qrob_T0548170.2		2.71
Qrob_T0401120.2		2.7
Qrob_T0562510.2		2.7
Qrob_T0301470.2	protein NRT1/ PTR FAMILY 2.11-like, transcript variant X1	2.68
Qrob_T0370430.2		2.68
Qrob_T0218950.2		2.68
Qrob_T0706240.2	G-type lectin S-receptor-like serine/threonine-protein kinase At4g27290, transcript variant X1	2.68
Qrob_T0180070.2	protein LURP-one-related 11-like	2.66
Qrob_T0454850.2	LOB domain-containing protein 1-like	2.65
Qrob_T0090740.2		2.65
Qrob_T0434020.2	cucumisin-like	2.65
Qrob_T0256630.2	glutathione S-transferase U8-like	2.64
Qrob_T0507190.2	epoxide hydrolase A-like	2.64
Qrob_T0485280.2	cucumber peeling cupredoxin-like	2.63
Qrob_T0453950.2		2.63
Qrob_T0682150.2	germin-like protein subfamily 1 member 7	2.63
Qrob_T0266140.2	cytochrome P450 81Q32-like	2.62
Qrob_T0567430.2	eukaryotic peptide chain release factor subunit 1-3-like	2.6
Qrob_T0542830.2	GDSL esterase/lipase 1-like	2.6
Qrob_T0341210.2		2.6
Qrob_T0098800.2	cytochrome P450 CYP736A12-like	2.59
Qrob_T0556030.2	non-lysosomal glucosylceramidase-like, transcript variant X4	2.59
Qrob_T0753220.2	probable glutathione S-transferase	2.58
Qrob_T0304980.2		2.58
Qrob_T0655330.2		2.57
Qrob_T0608680.2	epidermis-specific secreted glycoprotein EP1-like	2.56
Qrob_T0481060.2	LEAF RUST 10 DISEASE-RESISTANCE LOCUS RECEPTOR-LIKE PROTEIN KINASE-like 1.1, transcript variant X1	2.56
Qrob_T0542930.2		2.56
Qrob_T0116130.2	protein DMR6-LIKE OXYGENASE 2-like	2.55
Qrob_T0727820.2		2.55
Qrob_T0771800.2	glycine-rich domain-containing protein 1-like	2.55
Qrob_T0657550.2	bidirectional sugar transporter SWEET12-like	2.53
Qrob_T0236270.2		2.53
Qrob_T0415190.2	TMV resistance protein N-like, transcript variant X10	2.53
Qrob_T0097760.2	hydroquinone glucosyltransferase-like	2.52
Qrob_T0275420.2	carboxylesterase 1-like	2.52
Qrob_T0550950.2	probable WRKY transcription factor 29, transcript variant X1	2.51
Qrob_T0312030.2	probable F-box protein At4g22030	2.51
Qrob_T0578330.2	pectinesterase 2-like	2.51
Qrob_T0115700.2	probable LRR receptor-like serine/threonine-protein kinase At1g56140, transcript variant X4	2.51
Qrob_T0451600.2	U-box domain-containing protein 33-like, transcript variant X2	2.5
Qrob_T0447650.2		2.49
Qrob_T0642090.2	geraniol 8-hydroxylase-like	2.48
Qrob_T0565190.2	protein STABILIZED1	2.47
Qrob_T0104360.2	uncharacterized protein PHLOEM PROTEIN 2-LIKE A4-like	2.47
Qrob_T0281790.2		2.47
Qrob_T0005800.2	carbonic anhydrase 2-like	2.46
Qrob_T0556170.2		2.46
Qrob_T0280290.2	cationic peroxidase 1-like	2.45
Qrob_T0418790.2	purine permease 3-like	2.45
Qrob_T0204370.2		2.45
Qrob_T0422260.2	peroxidase 5-like, transcript variant X1	2.44
Qrob_T0594940.2		2.44
Qrob_T0011460.2	cytochrome c biogenesis protein CCS1, chloroplastic-like, transcript variant X1	2.43
Qrob_T0204920.2	cytokinin riboside 5'-monophosphate phosphoribohydrolase LOG5-like, transcript variant X1	2.42
Qrob_T0248400.2	scarecrow-like protein 30	2.41
Qrob_T0064660.2	uncharacterized LOC115991939	2.4
Qrob_T0157160.2		2.4
Qrob_T0266210.2		2.4
Qrob_T0261140.2	putative oxidoreductase TDA3, transcript variant X2	2.39
Qrob_T0010770.2	allene oxide synthase 3-like	2.39
Qrob_T0010590.2		2.39
Qrob_T0278970.2	homocysteine S-methyltransferase 3	2.38
Qrob_T0481930.2	tropinone reductase homolog At1g07440-like, transcript variant X1	2.37
Qrob_T0087220.2	putative disease resistance protein RGA3	2.37
Qrob_T0341540.2	uncharacterized LOC115960928	2.37
Qrob_T0253640.2	probable leucine-rich repeat receptor-like serine/threonine-protein kinase At3g14840	2.36
Qrob_T0342340.2	peroxidase 10-like	2.36
Qrob_T0318160.2	cytochrome P450 CYP82D47-like	2.36
Qrob_T0084780.2	cyclic nucleotide-gated ion channel 1-like, transcript variant X4	2.36
Qrob_T0303850.2	18.1 kDa class I heat shock protein-like	2.35
Qrob_T0365770.2		2.35
Qrob_T0536310.2	nuclear poly(A) polymerase 1-like	2.35
Qrob_T0104510.2	AAA-ATPase At2g18193-like	2.35
Qrob_T0477090.2	phenylcoumaran benzylic ether reductase Betv6-like	2.34
Qrob_T0530500.2	replication factor C subunit 1-like, transcript variant X11	2.34
Qrob_T0372640.2	receptor-like protein EIX2	2.33
Qrob_T0558150.2	probable protein phosphatase 2C 72	2.33
Qrob_T0119660.2		2.32
Qrob_T0176510.2	uncharacterized LOC115957285	2.3
Qrob_T0221230.2		2.3
Qrob_T0247910.2	MACPF domain-containing protein At1g14780-like	2.29
Qrob_T0617230.2	chloroplast envelope quinone oxidoreductase homolog	2.29
Qrob_T0081900.2		2.29
Qrob_T0437660.2	LOB domain-containing protein 1-like	2.28
Qrob_T0495440.2	chaperone protein dnaJ 11, chloroplastic	2.28
Qrob_T0682350.2	polyphenol oxidase, chloroplastic-like, transcript variant X2	2.28
Qrob_T0316520.2	NAC domain-containing protein 73-like, transcript variant X3	2.28
Qrob_T0170420.2	TMV resistance protein N-like, transcript variant X1	2.28
Qrob_T0379630.2	membrane protein PM19L	2.27
Qrob_T0137170.2	two-component response regulator-like APRR2, transcript variant X2	2.27
Qrob_T0497690.2	uncharacterized LOC115955198	2.27
Qrob_T0718400.2	senescence-associated carboxylesterase 101-like	2.27
Qrob_T0698930.2	protein LOL1, transcript variant X2	2.26
Qrob_T0571740.2	NDR1/HIN1-like protein 10	2.26
Qrob_T0278980.2	pentatricopeptide repeat-containing protein At3g22690	2.26
Qrob_T0062310.2	G-type lectin S-receptor-like serine/threonine-protein kinase RKS1, transcript variant X1	2.26
Qrob_T0337740.2	patatin-like protein 2	2.25
Qrob_T0393670.2	cytochrome P450 94C1	2.25
Qrob_T0611600.2		2.25
Qrob_T0523980.2	glucan endo-1,3-beta-glucosidase 11-like	2.24
Qrob_T0466850.2	uncharacterized LOC115991871	2.24
Qrob_T0070990.2	BTB/POZ domain-containing protein At2g24240	2.24
Qrob_T0748670.2	auxin-responsive protein IAA29-like	2.24
Qrob_T0452490.2	G-type lectin S-receptor-like serine/threonine-protein kinase At1g11330	2.24
Qrob_T0699410.2	G-box-binding factor 3-like, transcript variant X2	2.24
Qrob_T0227470.2		2.24
Qrob_T0577300.2	tetraspanin-8-like	2.23
Qrob_T0416850.2	cyclic dof factor 3-like, transcript variant X1	2.23
Qrob_T0200200.2		2.23
Qrob_T0646690.2	ankyrin repeat-containing protein BDA1-like	2.23
Qrob_T0307510.2		2.22
Qrob_T0071330.2	temperature-induced lipocalin-1	2.21
Qrob_T0170250.2	probable nucleoredoxin 1	2.21
Qrob_T0397930.2	probable acyl-activating enzyme 6	2.21
Qrob_T0646680.2	dr1-associated corepressor-like	2.21
Qrob_T0540370.2	MLP-like protein 43	2.2
Qrob_T0444090.2	carboxylesterase 1-like	2.2
Qrob_T0339700.2	F-box protein At3g56470-like, transcript variant X2	2.2
Qrob_T0058370.2	uncharacterized LOC115992109	2.2
Qrob_T0531920.2	uncharacterized LOC115966727	2.2
Qrob_T0031860.2	uncharacterized LOC115989118	2.19
Qrob_T0127820.2	F-box/LRR-repeat protein 12	2.18
Qrob_T0472070.2		2.18
Qrob_T0759390.2	glucan endo-1,3-beta-glucosidase 11-like	2.18
Qrob_T0190180.2		2.18
Qrob_T0326300.2		2.18
Qrob_T0243870.2	glycerophosphodiester phosphodiesterase GDPD1, chloroplastic-like, transcript variant X1	2.17
Qrob_T0021290.2	transport and Golgi organization 2 homolog	2.16
Qrob_T0590770.2	uncharacterized LOC115971193, transcript variant X3	2.15
Qrob_T0463110.2		2.15
Qrob_T0464040.2		2.15
Qrob_T0125070.2	auxin response factor 7-like	2.15
Qrob_T0090430.2	alpha carbonic anhydrase 1, chloroplastic	2.14
Qrob_T0173050.2	wall-associated receptor kinase-like 14, transcript variant X3	2.13
Qrob_T0756850.2	AP-5 complex subunit mu, transcript variant X2	2.13
Qrob_T0688790.2	EG45-like domain containing protein	2.13
Qrob_T0323370.2		2.13
Qrob_T0027100.2		2.13
Qrob_T0206750.2		2.12
Qrob_T0404610.2	thylakoid lumenal 17.4 kDa protein, chloroplastic	2.12
Qrob_T0597990.2	G-type lectin S-receptor-like serine/threonine-protein kinase SD2-5	2.12
Qrob_T0011520.2	UPF0496 protein At4g34320-like, transcript variant X2	2.11
Qrob_T0216650.2	solute carrier family 25 member 44-like, transcript variant X1	2.11
Qrob_T0415890.2	uncharacterized LOC115966265	2.11
Qrob_T0063830.2	uncharacterized LOC115986612, transcript variant X5	2.11
Qrob_T0247900.2	MACPF domain-containing protein At1g14780-like	2.1
Qrob_T0638220.2	ELF3-like protein 2	2.1
Qrob_T0085170.2	cyclic nucleotide-gated ion channel 1-like, transcript variant X4	2.1
Qrob_T0256030.2	subtilisin-like protease SBT4.3	2.09
Qrob_T0735170.2	UDP-glycosyltransferase 74E2-like	2.09
Qrob_T0350810.2	limonoid UDP-glucosyltransferase-like	2.09
Qrob_T0030720.2	aldehyde dehydrogenase family 2 member B7, mitochondrial-like	2.08
Qrob_T0156470.2		2.08
Qrob_T0022340.2		2.08
Qrob_T0242830.2		2.07
Qrob_T0670780.2	probable galactinol--sucrose galactosyltransferase 6, transcript variant X1	2.06
Qrob_T0318030.2	cytochrome P450 CYP82D47-like	2.06
Qrob_T0377180.2	ethylene-responsive transcription factor ERF061	2.06
Qrob_T0769020.2	probable nucleoredoxin 3	2.06
Qrob_T0577260.2	glycine-rich protein 5-like	2.05
Qrob_T0594840.2		2.05
Qrob_T0347790.2	probable purine permease 4	2.05
Qrob_T0338000.2	BRI1 kinase inhibitor 1	2.05
Qrob_T0378010.2	probable glutathione S-transferase	2.04
Qrob_T0383360.2		2.04
Qrob_T0378060.2	probable glutathione S-transferase	2.04
Qrob_T0692890.2	U-box domain-containing protein 16	2.03
Qrob_T0346140.2	E3 ubiquitin-protein ligase RHA2B-like	2.03
Qrob_T0612630.2	3-hexulose-6-phosphate isomerase	2.03
Qrob_T0287330.2	transcription factor UNE10	2.03
Qrob_T0728000.2	F-box/kelch-repeat protein At3g23880-like, transcript variant X2	2.02
Qrob_T0172670.2	methylesterase 10-like, transcript variant X2	2.02
Qrob_T0180500.2	DNA repair protein recA homolog 2, mitochondrial-like	2.02
Qrob_T0178520.2	hexokinase-1-like	2.01
Qrob_T0309300.2		2.01
Qrob_T0094300.2	zinc finger CCCH domain-containing protein 1-like	2.01
Qrob_T0273160.2	thioredoxin-like 4, chloroplastic, transcript variant X2	2.01
Qrob_T0449750.2	26.5 kDa heat shock protein, mitochondrial, transcript variant X1	2
Qrob_T0380470.2		2
Qrob_T0693310.2	uncharacterized LOC115971856	1.99
Qrob_T0106760.2	organ-specific protein S2	1.99
Qrob_T0132530.2		1.99
Qrob_T0568660.2	endo-1,3;1,4-beta-D-glucanase-like	1.99
Qrob_T0063890.2	BAG family molecular chaperone regulator 6	1.97
Qrob_T0702350.2		1.97
Qrob_T0514280.2	protein SRG1-like	1.97
Qrob_T0003210.2	uncharacterized hydrolase YugF-like, transcript variant X1	1.97
Qrob_T0485420.2	F-box/kelch-repeat protein At3g06240-like	1.97
Qrob_T0418620.2		1.96
Qrob_T0095120.2	equilibrative nucleotide transporter 3-like	1.96
Qrob_T0459030.2	uncharacterized LOC115963953, transcript variant X2	1.96
Qrob_T0439680.2		1.96
Qrob_T0243510.2	berberine bridge enzyme-like 8	1.95
Qrob_T0153970.2	pectinesterase 2-like	1.95
Qrob_T0204310.2	plastocyanin	1.95
Qrob_T0402230.2		1.95
Qrob_T0595090.2		1.95
Qrob_T0170390.2	disease resistance protein TAO1-like, transcript variant X1	1.95
Qrob_T0577810.2	acetate/butyrate--CoA ligase AAE7, peroxisomal	1.94
Qrob_T0341700.2	TMV resistance protein N-like	1.94
Qrob_T0652100.2	cytochrome P450 709B2-like	1.93
Qrob_T0253780.2		1.93
Qrob_T0275430.2		1.93
Qrob_T0681470.2	glucan endo-1,3-beta-glucosidase, basic vacuolar isoform-like	1.92
Qrob_T0595570.2	beta-glucosidase 12-like, transcript variant X1	1.92
Qrob_T0351470.2	7-deoxyloganetin glucosyltransferase-like	1.92
Qrob_T0544170.2	2-oxoisovalerate dehydrogenase subunit alpha 2, mitochondrial-like	1.92
Qrob_T0291700.2	auxin-induced protein 15A-like	1.92
Qrob_T0357820.2		1.92
Qrob_T0555450.2		1.92
Qrob_T0712420.2	protein REVEILLE 1	1.91
Qrob_T0157200.2	DNA damage-repair/toleration protein DRT100-like	1.91
Qrob_T0558960.2	phytochrome A-associated F-box protein	1.91
Qrob_T0115780.2		1.91
Qrob_T0118950.2	uncharacterized LOC115991170	1.91
Qrob_T0524140.2	2-alkenal reductase (NADP(+)-dependent)-like	1.9
Qrob_T0447730.2		1.9
Qrob_T0349710.2	endochitinase 2-like	1.89
Qrob_T0518310.2		1.89
Qrob_T0004240.2	uncharacterized LOC115958187	1.89
Qrob_T0050070.2	potassium channel SKOR-like, transcript variant X6	1.89
Qrob_T0050080.2	potassium channel SKOR-like, transcript variant X4	1.89
Qrob_T0687330.2		1.89
Qrob_T0045630.2	3-oxo-Delta(4,5)-steroid 5-beta-reductase-like	1.88
Qrob_T0004940.2	protein SULFUR DEFICIENCY-INDUCED 1, transcript variant X2	1.88
Qrob_T0118980.2	cysteine-rich receptor-like protein kinase 10	1.88
Qrob_T0398240.2	photosynthetic NDH subunit of lumenal location 1, chloroplastic	1.88
Qrob_T0567500.2	beta-amylase 3, chloroplastic	1.87
Qrob_T0281150.2	transcription factor MYBS3-like	1.87
Qrob_T0575350.2	caffeoylshikimate esterase	1.87
Qrob_T0531870.2	3-oxo-Delta(4,5)-steroid 5-beta-reductase-like	1.86
Qrob_T0236590.2		1.86
Qrob_T0264390.2	uncharacterized LOC115970492	1.86
Qrob_T0134440.2		1.86
Qrob_T0087520.2		1.86
Qrob_T0125080.2	mediator of RNA polymerase II transcription subunit 15a-like	1.86
Qrob_T0153990.2	pectinesterase 2-like	1.85
Qrob_T0427580.2	G-type lectin S-receptor-like serine/threonine-protein kinase RKS1, transcript variant X1	1.85
Qrob_T0455240.2	18.2 kDa class I heat shock protein-like	1.85
Qrob_T0273370.2		1.85
Qrob_T0352250.2	protein MOTHER of FT and TFL1	1.85
Qrob_T0069760.2		1.85
Qrob_T0682760.2	uncharacterized LOC115978797	1.85
Qrob_T0252480.2		1.85
Qrob_T0275600.2	S-adenosylmethionine decarboxylase proenzyme-like	1.84
Qrob_T0522150.2	probable aminotransferase TAT2, transcript variant X2	1.84
Qrob_T0287030.2	acyl-coenzyme A thioesterase 13-like	1.84
Qrob_T0178660.2		1.83
Qrob_T0494750.2		1.83
Qrob_T0043290.2		1.83
Qrob_T0092640.2		1.83
Qrob_T0655540.2	F-box/FBD/LRR-repeat protein At4g26340-like, transcript variant X3	1.83
Qrob_T0568380.2	cell division control protein 48 homolog B-like	1.83
Qrob_T0178280.2	methionine gamma-lyase	1.82
Qrob_T0265370.2	F-box/kelch-repeat protein At2g44130-like	1.82
Qrob_T0059040.2	protein NUCLEAR FUSION DEFECTIVE 4-like, transcript variant X1	1.82
Qrob_T0753640.2	phytosulfokine receptor 1-like	1.82
Qrob_T0485310.2	cucumber peeling cupredoxin-like	1.82
Qrob_T0686740.2	E4 SUMO-protein ligase PIAL2-like, transcript variant X1	1.82
Qrob_T0508710.2	uncharacterized LOC115983408	1.81
Qrob_T0257590.2	putative anthocyanidin reductase	1.81
Qrob_T0648310.2	cytochrome P450 CYP82D47-like	1.81
Qrob_T0422900.2	GABA transporter 1-like, transcript variant X1	1.81
Qrob_T0108820.2		1.81
Qrob_T0686700.2	late embryogenesis abundant protein At1g64065	1.81
Qrob_T0081750.2	protein P21-like	1.8
Qrob_T0170320.2	probable inactive poly [ADP-ribose] polymerase SRO2	1.8
Qrob_T0368410.2		1.8
Qrob_T0223890.2		1.8
Qrob_T0027500.2	uncharacterized LOC115960325	1.8
Qrob_T0248750.2	putative glucose-6-phosphate 1-epimerase	1.8
Qrob_T0730700.2	patatin-like protein 2, transcript variant X1	1.79
Qrob_T0005720.2	probable inactive poly [ADP-ribose] polymerase SRO5, transcript variant X2	1.79
Qrob_T0135410.2	uncharacterized LOC115953522	1.79
Qrob_T0094590.2	transcription factor JUNGBRUNNEN 1-like	1.79
Qrob_T0430290.2	cold-regulated protein 27-like	1.78
Qrob_T0087370.2	protein MAINTENANCE OF PSII UNDER HIGH LIGHT 1	1.78
Qrob_T0173630.2		1.78
Qrob_T0699910.2		1.78
Qrob_T0173220.2	endochitinase-like	1.77
Qrob_T0291920.2	probable galactinol--sucrose galactosyltransferase 5	1.77
Qrob_T0384800.2	glutathione S-transferase U17-like	1.77
Qrob_T0598350.2	lecithin-cholesterol acyltransferase-like 1	1.77
Qrob_T0170410.2	TMV resistance protein N-like	1.77
Qrob_T0322880.2	phosphomethylpyrimidine synthase, chloroplastic	1.76
Qrob_T0249750.2	crocetin glucosyltransferase, chloroplastic-like	1.76
Qrob_T0567390.2		1.76
Qrob_T0405390.2		1.76
Qrob_T0688820.2	EG45-like domain containing protein	1.75
Qrob_T0648300.2	cytochrome P450 CYP82D47-like	1.75
Qrob_T0221240.2		1.75
Qrob_T0028450.2		1.75
Qrob_T0572980.2	plant-specific TFIIB-related protein PTF2	1.75
Qrob_T0304400.2	calcium-binding protein CML37-like	1.75
Qrob_T0237200.2	uncharacterized LOC115982467, transcript variant X1	1.74
Qrob_T0541390.2	flavonoid 3',5'-hydroxylase-like	1.74
Qrob_T0676100.2		1.74
Qrob_T0407340.2		1.73
Qrob_T0197930.2	uncharacterized protein At1g76070	1.73
Qrob_T0151660.2	probable pectinesterase/pectinesterase inhibitor 46	1.73
Qrob_T0080460.2	O-fucosyltransferase 30-like, transcript variant X4	1.73
Qrob_T0418750.2		1.73
Qrob_T0307520.2		1.73
Qrob_T0131460.2	UPF0496 protein At1g20180, transcript variant X1	1.73
Qrob_T0200120.2		1.73
Qrob_T0256490.2		1.73
Qrob_T0518320.2	probable serine/threonine-protein kinase PBL19	1.72
Qrob_T0452550.2		1.72
Qrob_T0294150.2	protein NRT1/ PTR FAMILY 8.2-like	1.72
Qrob_T0001280.2	cytochrome P450 94A1-like	1.72
Qrob_T0358840.2	F-box protein SKIP22-like	1.71
Qrob_T0336930.2		1.71
Qrob_T0582260.2	mediator of RNA polymerase II transcription subunit 22b-like	1.71
Qrob_T0113150.2		1.71
Qrob_T0612620.2	uncharacterized LOC115960752	1.71
Qrob_T0723080.2	late embryogenesis abundant protein Lea5-like	1.7
Qrob_T0072490.2	G-type lectin S-receptor-like serine/threonine-protein kinase At4g27290, transcript variant X1	1.7
Qrob_T0345090.2	G-type lectin S-receptor-like serine/threonine-protein kinase At4g27290, transcript variant X1	1.7
Qrob_T0189830.2	cytochrome P450 72A15-like	1.7
Qrob_T0010750.2	allene oxide synthase 3-like	1.7
Qrob_T0187840.2	protein argonaute 4A-like	1.7
Qrob_T0424590.2	putative cyclic nucleotide-gated ion channel 8	1.7
Qrob_T0335670.2	(-)-germacrene D synthase-like	1.69
Qrob_T0065230.2	U-box domain-containing protein 35-like	1.69
Qrob_T0202950.2	dehydrogenase/reductase SDR family member 12	1.69
Qrob_T0418760.2	purine permease 3-like	1.69
Qrob_T0402360.2	chromatin modification-related protein eaf6-like, transcript variant X1	1.69
Qrob_T0724940.2	probable disease resistance protein At4g27220	1.69
Qrob_T0343970.2	receptor-like protein kinase 5	1.69
Qrob_T0032150.2		1.69
Qrob_T0264940.2	sulfite exporter TauE/SafE family protein 3-like	1.68
Qrob_T0084240.2	auxin-responsive protein SAUR32	1.68
Qrob_T0202480.2		1.68
Qrob_T0036470.2	7-deoxyloganetin glucosyltransferase-like	1.68
Qrob_T0211970.2		1.68
Qrob_T0462030.2	xylose isomerase, transcript variant X1	1.67
Qrob_T0246700.2	protein PHYTOCHROME KINASE SUBSTRATE 1-like	1.67
Qrob_T0173370.2	receptor-like protein 7	1.67
Qrob_T0278600.2		1.67
Qrob_T0609420.2	receptor-like protein kinase FERONIA	1.67
Qrob_T0336020.2	RPM1-interacting protein 4-like	1.67
Qrob_T0008030.2		1.67
Qrob_T0687390.2	aquaporin NIP1-2-like	1.66
Qrob_T0180380.2		1.66
Qrob_T0147290.2	RING-H2 finger protein ATL70-like	1.66
Qrob_T0697070.2	uncharacterized LOC115970060, transcript variant X2	1.66
Qrob_T0389480.2		1.66
Qrob_T0379740.2	uncharacterized LOC115994197	1.66
Qrob_T0160160.2	probable LRR receptor-like serine/threonine-protein kinase At3g47570	1.66
Qrob_T0275280.2	MDIS1-interacting receptor like kinase 2-like	1.65
Qrob_T0450610.2		1.65
Qrob_T0170170.2	galactinol synthase 1-like	1.64
Qrob_T0527770.2	uncharacterized LOC115977838	1.64
Qrob_T0212430.2	uncharacterized LOC115959093	1.64
Qrob_T0608160.2	uncharacterized LOC115985427	1.64
Qrob_T0628490.2	probable LRR receptor-like serine/threonine-protein kinase At1g74360	1.64
Qrob_T0371730.2	putative zinc finger protein At1g68190, transcript variant X3	1.64
Qrob_T0314920.2		1.64
Qrob_T0200660.2	uncharacterized LOC115995178	1.64
Qrob_T0594290.2	germin-like protein subfamily 1 member 14	1.63
Qrob_T0030780.2	U-box domain-containing protein 19	1.63
Qrob_T0072590.2	G-type lectin S-receptor-like serine/threonine-protein kinase At4g27290	1.63
Qrob_T0033170.2	ethylene-responsive transcription factor ERF025-like	1.63
Qrob_T0369760.2	cytochrome P450 94A2-like	1.63
Qrob_T0172720.2	uncharacterized LOC115950919, transcript variant X1	1.63
Qrob_T0515700.2		1.63
Qrob_T0027850.2	uncharacterized LOC115994009, transcript variant X1	1.63
Qrob_T0648240.2	uncharacterized LOC115982127	1.63
Qrob_T0206680.2	L-idonate 5-dehydrogenase-like	1.62
Qrob_T0033670.2	O-glucosyltransferase rumi homolog, transcript variant X1	1.62
Qrob_T0400720.2	zinc finger BED domain-containing protein DAYSLEEPER-like	1.62
Qrob_T0436020.2	transcription factor bHLH51	1.62
Qrob_T0130450.2	TSL-kinase interacting protein 1	1.62
Qrob_T0738250.2	probable WRKY transcription factor 75	1.62
Qrob_T0158030.2	auxin-responsive protein SAUR23-like	1.62
Qrob_T0331120.2	zeatin O-glucosyltransferase-like	1.61
Qrob_T0685660.2	probable F-box protein At2g36090	1.61
Qrob_T0193560.2	protein RRNAD1, transcript variant X10	1.61
Qrob_T0017250.2		1.61
Qrob_T0474680.2	pentatricopeptide repeat-containing protein At4g04370	1.61
Qrob_T0477550.2	SPX domain-containing membrane protein At4g22990-like, transcript variant X1	1.6
Qrob_T0573380.2		1.6
Qrob_T0675780.2	glutathione S-transferase U7-like	1.6
Qrob_T0398460.2	cytochrome P450 81Q32-like	1.6
Qrob_T0159330.2	crocetin glucosyltransferase, chloroplastic-like	1.6
Qrob_T0147350.2		1.6
Qrob_T0395960.2	putative zinc finger protein CONSTANS-LIKE 11, transcript variant X4	1.6
Qrob_T0173250.2	uncharacterized LOC115974026	1.59
Qrob_T0219540.2	heat stress transcription factor C-1	1.59
Qrob_T0427490.2	G-type lectin S-receptor-like serine/threonine-protein kinase RKS1, transcript variant X1	1.59
Qrob_T0349760.2	probable mannitol dehydrogenase	1.59
Qrob_T0688170.2		1.59
Qrob_T0593730.2		1.58
Qrob_T0412680.2		1.58
Qrob_T0736400.2	anthocyanidin 5,3-O-glucosyltransferase-like	1.58
Qrob_T0382810.2	F-box/kelch-repeat protein At3g23880-like	1.58
Qrob_T0383250.2		1.58
Qrob_T0278390.2	probable xyloglucan endotransglucosylase/hydrolase protein 23	1.57
Qrob_T0205230.2	BTB/POZ domain-containing protein At2g30600, transcript variant X3	1.57
Qrob_T0057430.2	zinc finger protein 5-like, transcript variant X2	1.57
Qrob_T0310210.2	GDSL esterase/lipase 1-like	1.57
Qrob_T0752140.2	cytochrome P450 76T24-like	1.57
Qrob_T0146510.2		1.57
Qrob_T0701720.2	uncharacterized oxidoreductase At4g09670-like	1.57
Qrob_T0705110.2	probable RNA-dependent RNA polymerase 1	1.57
Qrob_T0235870.2	protein EARLY FLOWERING 4-like	1.57
Qrob_T0241800.2	acid phosphatase 1, transcript variant X1	1.57
Qrob_T0654870.2		1.56
Qrob_T0592440.2	tuberculostearic acid methyltransferase UfaA1-like, transcript variant X8	1.56
Qrob_T0176100.2		1.56
Qrob_T0622590.2		1.56
Qrob_T0123650.2		1.56
Qrob_T0740090.2	trihelix transcription factor GT-3b-like	1.55
Qrob_T0162880.2	E3 ubiquitin-protein ligase MBR2-like, transcript variant X4	1.55
Qrob_T0455290.2	18.2 kDa class I heat shock protein-like	1.55
Qrob_T0245410.2	F-box/kelch-repeat protein At1g67480, transcript variant X2	1.54
Qrob_T0366500.2	uncharacterized calcium-binding protein At1g02270-like, transcript variant X3	1.54
Qrob_T0176070.2		1.54
Qrob_T0137760.2	uncharacterized LOC115955387, transcript variant X1	1.54
Qrob_T0318610.2	protein BIG GRAIN 1-like B	1.54
Qrob_T0446360.2	probable anion transporter 5	1.54
Qrob_T0492430.2	pleiotropic drug resistance protein 2-like, transcript variant X1	1.54
Qrob_T0439660.2	probable LRR receptor-like serine/threonine-protein kinase At1g53430, transcript variant X1	1.54
Qrob_T0736490.2	RNA polymerase sigma factor sigC, transcript variant X1	1.54
Qrob_T0009560.2		1.54
Qrob_T0015900.2	probable aldo-keto reductase 1	1.53
Qrob_T0245600.2	disease resistance protein RGA2-like, transcript variant X5	1.53
Qrob_T0061770.2		1.53
Qrob_T0510490.2	F-box protein PP2-A13-like	1.52
Qrob_T0200590.2	cytochrome P450 CYP736A12-like	1.52
Qrob_T0538510.2	basic blue protein-like	1.52
Qrob_T0642010.2	serine/threonine-protein kinase SAPK2, transcript variant X1	1.52
Qrob_T0590790.2	uncharacterized LOC115971193, transcript variant X2	1.52
Qrob_T0206660.2	sorbitol dehydrogenase, transcript variant X2	1.52
Qrob_T0388920.2		1.52
Qrob_T0061720.2		1.52
Qrob_T0647400.2	exocyst complex component EXO70H1-like	1.52
Qrob_T0287200.2		1.52
Qrob_T0073750.2	pectin acetylesterase 8-like	1.52
Qrob_T0011300.2		1.52
Qrob_T0013330.2	probable aldo-keto reductase 3, transcript variant X4	1.51
Qrob_T0682360.2	polyphenol oxidase, chloroplastic-like, transcript variant X2	1.51
Qrob_T0013140.2	dynein light chain 1, cytoplasmic-like	1.51
Qrob_T0487240.2	uncharacterized oxidoreductase At4g09670-like	1.51
Qrob_T0084120.2	AAA-ATPase At2g46620-like	1.51
Qrob_T0728310.2	putative disease resistance RPP13-like protein 1	1.51
Qrob_T0234500.2	GDSL esterase/lipase 1-like	1.51
Qrob_T0210810.2	LEAF RUST 10 DISEASE-RESISTANCE LOCUS RECEPTOR-LIKE PROTEIN KINASE-like 1.2	1.51
Qrob_T0707000.2	glutathione S-transferase L3-like	1.51
Qrob_T0760430.2	uncharacterized protein At5g39570	1.5
Qrob_T0682190.2	germin-like protein subfamily 1 member 7	1.5
Qrob_T0030820.2	protein MAK16 homolog A-like	1.5
Qrob_T0279450.2		1.49
Qrob_T0178170.2	metal-nicotianamine transporter YSL1, transcript variant X2	1.49
Qrob_T0593860.2	uncharacterized LOC115968686	1.49
Qrob_T0373090.2		1.49
Qrob_T0345120.2		1.49
Qrob_T0039450.2	thaumatin-like protein 1	1.49
Qrob_T0049880.2	glutathione transferase GST 23-like	1.49
Qrob_T0155940.2	ubiquitin carboxyl-terminal hydrolase 25	1.49
Qrob_T0427740.2	G-type lectin S-receptor-like serine/threonine-protein kinase At1g11410, transcript variant X1	1.49
Qrob_T0378130.2		1.49
Qrob_T0707900.2	thiol protease aleurain-like	1.48
Qrob_T0244170.2	WRKY transcription factor WRKY24-like	1.48
Qrob_T0148930.2	protein REVEILLE 7-like, transcript variant X1	1.48
Qrob_T0654090.2		1.48
Qrob_T0521120.2	uncharacterized LOC115989568	1.48
Qrob_T0370870.2	cysteine-rich receptor-like protein kinase 2	1.48
Qrob_T0172650.2	salicylic acid-binding protein 2-like	1.47
Qrob_T0758410.2	methylcrotonoyl-CoA carboxylase beta chain, mitochondrial	1.47
Qrob_T0318020.2	cytochrome P450 CYP82D47-like	1.47
Qrob_T0632370.2	protein PIN-LIKES 3-like, transcript variant X6	1.47
Qrob_T0257420.2		1.47
Qrob_T0456880.2	F-box/kelch-repeat protein At3g61590-like	1.47
Qrob_T0157390.2		1.47
Qrob_T0357390.2	transcription factor MYBS3	1.46
Qrob_T0057850.2	uncharacterized LOC115992109	1.46
Qrob_T0451570.2	L-type lectin-domain containing receptor kinase S.1	1.46
Qrob_T0001430.2	serine--glyoxylate aminotransferase	1.46
Qrob_T0333700.2	2-alkenal reductase (NADP(+)-dependent)-like	1.46
Qrob_T0119040.2	cysteine-rich receptor-like protein kinase 10	1.46
Qrob_T0426520.2	18.1 kDa class I heat shock protein-like	1.46
Qrob_T0537870.2	cytochrome P450 82G1-like	1.46
Qrob_T0247190.2	UDP-glycosyltransferase 87A2-like	1.45
Qrob_T0101960.2	synaptotagmin-3-like, transcript variant X1	1.45
Qrob_T0310230.2	GDSL esterase/lipase 1-like	1.45
Qrob_T0288290.2	C2 and GRAM domain-containing protein At1g03370	1.45
Qrob_T0336120.2	probable N-acetyltransferase HLS1	1.45
Qrob_T0596290.2		1.45
Qrob_T0079100.2	1-aminocyclopropane-1-carboxylate synthase 1, transcript variant X1	1.45
Qrob_T0460850.2	ribosome maturation protein SBDS	1.44
Qrob_T0710390.2	uncharacterized LOC115969880	1.44
Qrob_T0400980.2	G-type lectin S-receptor-like serine/threonine-protein kinase SD2-5	1.44
Qrob_T0183970.2	protein BOBBER 1-like	1.44
Qrob_T0528690.2	polyadenylate-binding protein 3-like	1.44
Qrob_T0478580.2	probable glutathione S-transferase	1.44
Qrob_T0030880.2	ubiquitin-like-specific protease 1D, transcript variant X8	1.44
Qrob_T0035930.2	acylamino-acid-releasing enzyme-like, transcript variant X2	1.44
Qrob_T0124040.2	heat stress transcription factor A-1b, transcript variant X5	1.43
Qrob_T0266770.2	cationic amino acid transporter 7, chloroplastic	1.43
Qrob_T0278320.2	uncharacterized LOC115973989	1.43
Qrob_T0041560.2	chaperone protein dnaJ 20, chloroplastic-like	1.43
Qrob_T0181000.2	nuclear intron maturase 3, mitochondrial-like, transcript variant X1	1.43
Qrob_T0502610.2	copper chaperone for superoxide dismutase, chloroplastic/cytosolic, transcript variant X1	1.42
Qrob_T0132290.2	probable inactive poly [ADP-ribose] polymerase SRO3	1.42
Qrob_T0465040.2	anthocyanidin 3-O-glucosyltransferase 5-like	1.42
Qrob_T0424720.2	receptor-like cytosolic serine/threonine-protein kinase RBK2	1.42
Qrob_T0068370.2	alkaline/neutral invertase A, mitochondrial-like	1.42
Qrob_T0173060.2	thioredoxin-like protein HCF164, chloroplastic	1.42
Qrob_T0174110.2	sodium-dependent phosphate transport protein 1, chloroplastic	1.42
Qrob_T0656140.2	probable WRKY transcription factor 31	1.41
Qrob_T0333620.2	2-alkenal reductase (NADP(+)-dependent)-like	1.41
Qrob_T0509680.2	hydroquinone glucosyltransferase-like	1.41
Qrob_T0586330.2	pentatricopeptide repeat-containing protein At1g25360, transcript variant X2	1.41
Qrob_T0242130.2	probable LRR receptor-like serine/threonine-protein kinase At3g47570	1.41
Qrob_T0236890.2	cinnamoyl-CoA reductase 1	1.4
Qrob_T0480650.2	zinc finger protein CONSTANS-LIKE 9, transcript variant X3	1.4
Qrob_T0422130.2	NAC domain containing protein 50-like, transcript variant X1	1.4
Qrob_T0025590.2	germin-like protein subfamily 1 member 11	1.4
Qrob_T0427550.2		1.4
Qrob_T0663870.2		1.4
Qrob_T0495120.2	tropinone reductase-like 3	1.39
Qrob_T0590240.2	wall-associated receptor kinase-like 20	1.39
Qrob_T0567490.2	probable serine/threonine-protein kinase PBL19	1.39
Qrob_T0326770.2	serine--tRNA ligase-like, transcript variant X2	1.39
Qrob_T0480920.2	glycosyltransferase BC10-like	1.39
Qrob_T0166530.2	UDP-glycosyltransferase 83A1-like	1.39
Qrob_T0540670.2	exocyst complex component EXO70H1-like	1.39
Qrob_T0081890.2	salutaridine reductase-like, transcript variant X2	1.39
Qrob_T0628650.2	probable low-specificity L-threonine aldolase 1, transcript variant X3	1.38
Qrob_T0141830.2	probable serine/threonine-protein kinase PBL19, transcript variant X2	1.38
Qrob_T0397110.2	WRKY transcription factor 6-like	1.38
Qrob_T0010600.2		1.38
Qrob_T0247710.2	uncharacterized LOC115982014	1.38
Qrob_T0049140.2	ubiquinol oxidase, mitochondrial-like	1.38
Qrob_T0125190.2	UDP-glycosyltransferase 71K1-like	1.38
Qrob_T0664140.2	laccase-7-like	1.37
Qrob_T0004680.2	probable leucine-rich repeat receptor-like protein kinase At2g33170	1.37
Qrob_T0331770.2	probable LRR receptor-like serine/threonine-protein kinase At1g06840, transcript variant X3	1.37
Qrob_T0572110.2		1.37
Qrob_T0124690.2		1.37
Qrob_T0370880.2	cysteine-rich receptor-like protein kinase 2	1.37
Qrob_T0468380.2	serine/threonine-protein kinase STN7, chloroplastic, transcript variant X1	1.37
Qrob_T0513930.2	uncharacterized LOC115993845	1.37
Qrob_T0561290.2	LOB domain-containing protein 19-like	1.37
Qrob_T0354900.2		1.37
Qrob_T0436820.2	transcriptional corepressor LEUNIG, transcript variant X2	1.36
Qrob_T0621570.2		1.36
Qrob_T0317460.2	WRKY transcription factor 71-like, transcript variant X1	1.36
Qrob_T0414110.2	beta-glucosidase BoGH3B-like, transcript variant X4	1.36
Qrob_T0463690.2		1.36
Qrob_T0600860.2	putative clathrin assembly protein At4g40080	1.36
Qrob_T0248200.2	uncharacterized LOC115986757, transcript variant X1	1.36
Qrob_T0715920.2	putative disease resistance protein RGA3, transcript variant X1	1.36
Qrob_T0082080.2	20S-pre-rRNA D-site endonuclease nob1-like	1.36
Qrob_T0699190.2	DCC family protein At1g52590, chloroplastic, transcript variant X1	1.36
Qrob_T0477630.2	12S seed storage globulin 1-like	1.35
Qrob_T0477290.2	uncharacterized LOC115994940, transcript variant X2	1.35
Qrob_T0480670.2		1.35
Qrob_T0181360.2	uncharacterized LOC115958031	1.35
Qrob_T0198850.2	sufE-like protein 2, chloroplastic	1.35
Qrob_T0476560.2	uncharacterized LOC115964927	1.35
Qrob_T0600280.2		1.35
Qrob_T0598140.2	17.8 kDa class I heat shock protein-like	1.35
Qrob_T0153090.2		1.35
Qrob_T0081840.2	(+)-neomenthol dehydrogenase-like	1.35
Qrob_T0206670.2	sorbitol dehydrogenase-like	1.34
Qrob_T0657980.2	NAC domain-containing protein 2-like	1.34
Qrob_T0272940.2	uncharacterized LOC115975548	1.34
Qrob_T0159520.2	monothiol glutaredoxin-S2-like	1.34
Qrob_T0181420.2	beta-1,2-xylosyltransferase XYXT1-like	1.34
Qrob_T0283610.2		1.34
Qrob_T0405100.2	chaperone protein DnaJ	1.34
Qrob_T0097880.2	kinesin-like protein KIN-14L, transcript variant X1	1.34
Qrob_T0162890.2	E3 ubiquitin-protein ligase MBR2-like, transcript variant X4	1.34
Qrob_T0205740.2		1.34
Qrob_T0225690.2	triacylglycerol lipase SDP1	1.33
Qrob_T0007370.2	amino acid transporter AVT1I-like	1.33
Qrob_T0322680.2	hexose carrier protein HEX6-like	1.33
Qrob_T0131630.2	ubiquitin-conjugating enzyme E2 11-like	1.33
Qrob_T0516240.2	sugar transport protein 7-like	1.33
Qrob_T0403110.2	germin-like protein subfamily 1 member 11	1.33
Qrob_T0601440.2		1.33
Qrob_T0375950.2		1.33
Qrob_T0115410.2	probable leucine-rich repeat receptor-like protein kinase At5g49770, transcript variant X7	1.33
Qrob_T0706950.2		1.33
Qrob_T0002010.2	epoxide hydrolase A-like	1.33
Qrob_T0104910.2		1.33
Qrob_T0108830.2		1.33
Qrob_T0573250.2	protein translation factor SUI1 homolog 1	1.32
Qrob_T0689460.2	uncharacterized LOC115968269	1.32
Qrob_T0624250.2	uncharacterized protein At1g01500, transcript variant X3	1.32
Qrob_T0601580.2	zinc finger CCCH domain-containing protein 1-like, transcript variant X2	1.32
Qrob_T0125100.2	F-box protein At3g07870-like	1.32
Qrob_T0477530.2	SPX domain-containing membrane protein At4g22990-like, transcript variant X2	1.31
Qrob_T0294170.2	protein OCTOPUS	1.31
Qrob_T0674270.2	homeobox protein BEL1 homolog	1.31
Qrob_T0676470.2	light-regulated protein 1, chloroplastic-like	1.31
Qrob_T0502480.2	leucoanthocyanidin dioxygenase-like	1.31
Qrob_T0417220.2	TMV resistance protein N-like, transcript variant X2	1.31
Qrob_T0060720.2		1.31
Qrob_T0615650.2	NDR1/HIN1-like protein 3	1.3
Qrob_T0236610.2		1.3
Qrob_T0324560.2	uncharacterized LOC115976035	1.3
Qrob_T0248320.2	scarecrow-like protein 34	1.3
Qrob_T0402380.2	transcription factor MYB4-like	1.3
Qrob_T0172840.2	protease 2	1.3
Qrob_T0200470.2	stress enhanced protein 2, chloroplastic	1.3
Qrob_T0587550.2	uncharacterized LOC115985817	1.3
Qrob_T0655340.2		1.3
Qrob_T0457240.2		1.3
Qrob_T0428020.2	eukaryotic peptide chain release factor subunit 1-3-like, transcript variant X2	1.29
Qrob_T0073230.2	WRKY transcription factor 28-like	1.29
Qrob_T0371620.2	E3 ubiquitin-protein ligase RHA2A	1.29
Qrob_T0396610.2	beta carbonic anhydrase 5, chloroplastic-like	1.29
Qrob_T0252470.2	probable amino acid permease 7, transcript variant X5	1.29
Qrob_T0522790.2	mitogen-activated protein kinase kinase kinase 18-like	1.29
Qrob_T0405460.2	pleiotropic drug resistance protein 1-like, transcript variant X2	1.29
Qrob_T0501810.2	L-type lectin-domain containing receptor kinase IX.1-like	1.29
Qrob_T0415520.2	cytochrome P450 76T24-like	1.29
Qrob_T0726010.2	protein PLASTID MOVEMENT IMPAIRED 1	1.29
Qrob_T0266090.2	uncharacterized LOC115953276	1.29
Qrob_T0544150.2	putative pentatricopeptide repeat-containing protein At1g77010, mitochondrial, transcript variant X5	1.29
Qrob_T0191080.2	cytochrome P450 CYP82D47-like	1.28
Qrob_T0473960.2	cinnamoyl-CoA reductase 2-like	1.28
Qrob_T0557650.2	expansin-like B1	1.28
Qrob_T0461220.2	germin-like protein subfamily 1 member 7	1.28
Qrob_T0691620.2	laccase-15-like	1.28
Qrob_T0057390.2	metalloendoproteinase 2-MMP-like	1.28
Qrob_T0049440.2	probable LRR receptor-like serine/threonine-protein kinase At1g56140, transcript variant X2	1.28
Qrob_T0514510.2	protein SRG1-like	1.28
Qrob_T0043270.2		1.28
Qrob_T0017180.2	putative glycine-rich cell wall structural protein 1	1.28
Qrob_T0429990.2	heat shock 70 kDa protein 8	1.27
Qrob_T0219430.2		1.27
Qrob_T0678220.2	uncharacterized LOC115994724, transcript variant X2	1.27
Qrob_T0070270.2	germin-like protein subfamily T member 2	1.27
Qrob_T0641330.2	translocase of chloroplast 159, chloroplastic	1.27
Qrob_T0090550.2		1.27
Qrob_T0279290.2	probable ATP-dependent DNA helicase CHR12, transcript variant X1	1.27
Qrob_T0536500.2		1.27
Qrob_T0602810.2	probable WRKY transcription factor 69	1.27
Qrob_T0089660.2	coatomer subunit beta'-1-like	1.27
Qrob_T0206890.2		1.27
Qrob_T0371360.2	uncharacterized LOC115964300	1.27
Qrob_T0380460.2	uncharacterized LOC115979942, transcript variant X3	1.27
Qrob_T0344200.2	transcription factor MYB8-like	1.26
Qrob_T0280180.2	uncharacterized LOC115984802	1.26
Qrob_T0535890.2	pathogen-associated molecular patterns-induced protein A70-like, transcript variant X3	1.26
Qrob_T0544580.2	exocyst complex component EXO70A1	1.26
Qrob_T0050330.2	replication protein A 70 kDa DNA-binding subunit A-like	1.26
Qrob_T0495650.2	uncharacterized LOC115992995	1.26
Qrob_T0285530.2	uncharacterized protein At1g51745, transcript variant X1	1.26
Qrob_T0432020.2	DNA topoisomerase 6 subunit B	1.26
Qrob_T0215400.2	protein SRC2 homolog	1.26
Qrob_T0594080.2	protein RESPONSE TO LOW SULFUR 3-like	1.26
Qrob_T0554090.2	cinnamoyl-CoA reductase 2-like, transcript variant X5	1.26
Qrob_T0377930.2	photosystem I reaction center subunit IV A, chloroplastic	1.26
Qrob_T0505040.2	homogentisate 1,2-dioxygenase	1.25
Qrob_T0398690.2	eukaryotic translation initiation factor 5-like, transcript variant X2	1.25
Qrob_T0722860.2	polyubiquitin-like	1.25
Qrob_T0608750.2	protein DJ-1 homolog B, transcript variant X1	1.25
Qrob_T0544200.2	ACT domain-containing protein ACR3, transcript variant X2	1.25
Qrob_T0085660.2	beta-fructofuranosidase, insoluble isoenzyme CWINV1-like	1.25
Qrob_T0401230.2		1.25
Qrob_T0682210.2	germin-like protein subfamily 1 member 7	1.25
Qrob_T0021880.2	leucine-rich repeat receptor-like serine/threonine-protein kinase At1g17230, transcript variant X2	1.25
Qrob_T0019100.2	zinc finger protein CONSTANS-LIKE 13, transcript variant X2	1.25
Qrob_T0515690.2	tRNA-dihydrouridine(20) synthase [NAD(P)+]-like, transcript variant X2	1.25
Qrob_T0414660.2		1.25
Qrob_T0322630.2	hexose carrier protein HEX6-like	1.25
Qrob_T0519300.2	vacuolar protein sorting-associated protein 26C-like	1.25
Qrob_T0484830.2	pentatricopeptide repeat-containing protein At3g02330, mitochondrial	1.25
Qrob_T0564380.2		1.25
Qrob_T0532990.2	protein BRASSINAZOLE-RESISTANT 1-like	1.24
Qrob_T0047150.2	uncharacterized LOC115963313	1.24
Qrob_T0111530.2	2-oxoisovalerate dehydrogenase subunit beta 1, mitochondrial, transcript variant X2	1.24
Qrob_T0126980.2	pathogenesis-related genes transcriptional activator PTI6-like	1.24
Qrob_T0081800.2		1.24
Qrob_T0498850.2	uncharacterized LOC115985180, transcript variant X6	1.24
Qrob_T0477540.2	SPX domain-containing membrane protein At4g22990-like, transcript variant X2	1.24
Qrob_T0311970.2	uncharacterized LOC115988385, transcript variant X2	1.24
Qrob_T0080980.2		1.24
Qrob_T0004130.2	abscisic acid receptor PYL4-like	1.24
Qrob_T0637380.2		1.24
Qrob_T0746600.2	uncharacterized LOC115978064	1.24
Qrob_T0139430.2		1.24
Qrob_T0656920.2	kinesin-like protein NACK2	1.24
Qrob_T0237310.2	plant intracellular Ras-group-related LRR protein 3-like	1.23
Qrob_T0705190.2	caffeoylshikimate esterase-like	1.23
Qrob_T0492170.2		1.23
Qrob_T0616470.2	3-hydroxybutyryl-CoA dehydrogenase	1.22
Qrob_T0501580.2	GDSL esterase/lipase CPRD49-like, transcript variant X2	1.22
Qrob_T0665420.2	protein PHLOEM PROTEIN 2-LIKE A10-like	1.22
Qrob_T0361120.2	uncharacterized LOC115965502, transcript variant X2	1.22
Qrob_T0002100.2		1.22
Qrob_T0008020.2	metal tolerance protein 4-like, transcript variant X2	1.22
Qrob_T0242460.2	uncharacterized LOC115987042, transcript variant X2	1.22
Qrob_T0354890.2	uncharacterized LOC115981814	1.22
Qrob_T0594300.2	germin-like protein subfamily 1 member 14	1.21
Qrob_T0112060.2	hypersensitive-induced response protein 1-like	1.21
Qrob_T0581260.2	phosphoribosylamine--glycine ligase	1.21
Qrob_T0404990.2	myb-related protein 308-like	1.21
Qrob_T0234620.2	GDSL esterase/lipase 1-like	1.21
Qrob_T0416500.2	uncharacterized LOC115965409	1.21
Qrob_T0165630.2	nuclear intron maturase 2, mitochondrial	1.21
Qrob_T0292970.2	uncharacterized LOC115969647	1.21
Qrob_T0039300.2	putative F-box protein At1g55070, transcript variant X2	1.21
Qrob_T0509710.2	hydroquinone glucosyltransferase-like	1.21
Qrob_T0171510.2	uncharacterized LOC115962673	1.21
Qrob_T0448440.2	probable protein phosphatase 2C 33, transcript variant X1	1.2
Qrob_T0510430.2	peroxisomal membrane protein 11C-like, transcript variant X3	1.2
Qrob_T0238390.2	ganglioside-induced differentiation-associated protein 2	1.2
Qrob_T0415430.2	cytochrome P450 704C1-like, transcript variant X1	1.2
Qrob_T0391670.2	protein LURP-one-related 10-like	1.2
Qrob_T0000010.2		1.2
Qrob_T0707350.2	transcription factor ICE1-like	1.2
Qrob_T0273140.2	cold-regulated protein 27	1.2
Qrob_T0239550.2	uncharacterized LOC115962832, transcript variant X2	1.2
Qrob_T0333780.2	2-alkenal reductase (NADP(+)-dependent)-like	1.2
Qrob_T0759270.2	F-box/kelch-repeat protein At3g27150, transcript variant X5	1.19
Qrob_T0680320.2	glycerol-3-phosphate acyltransferase 9-like, transcript variant X3	1.19
Qrob_T0283320.2	trihelix transcription factor GT-2-like	1.19
Qrob_T0155520.2	gibberellin 2-beta-dioxygenase 1-like	1.19
Qrob_T0446430.2	tetraspanin-19	1.19
Qrob_T0248340.2	scarecrow-like protein 33	1.19
Qrob_T0600910.2	protein DETOXIFICATION 27-like	1.19
Qrob_T0651790.2	uncharacterized LOC115981704	1.19
Qrob_T0520580.2	uncharacterized protein At5g02240-like	1.19
Qrob_T0439950.2	putative GTP diphosphokinase RSH1, chloroplastic	1.19
Qrob_T0517070.2	zinc finger protein SHOOT GRAVITROPISM 5	1.19
Qrob_T0252460.2	probable amino acid permease 7, transcript variant X5	1.19
Qrob_T0144860.2	uncharacterized LOC115971004	1.19
Qrob_T0343810.2		1.19
Qrob_T0601460.2	cytochrome P450 76A1-like	1.19
Qrob_T0353950.2	erlin-2-B-like	1.19
Qrob_T0359020.2	glu S.griseus protease inhibitor-like	1.18
Qrob_T0625220.2	protein CHUP1, chloroplastic-like, transcript variant X4	1.18
Qrob_T0183930.2	potassium channel SKOR	1.18
Qrob_T0571040.2	probable calcium-binding protein CML48	1.18
Qrob_T0010560.2	diphthamide biosynthesis protein 3-like	1.18
Qrob_T0559070.2	caffeoylshikimate esterase-like	1.18
Qrob_T0206930.2		1.18
Qrob_T0756100.2	40S ribosomal protein S25-2	1.18
Qrob_T0196570.2	probable LRR receptor-like serine/threonine-protein kinase At1g56140, transcript variant X4	1.18
Qrob_T0028580.2	uncharacterized LOC115966229	1.18
Qrob_T0215120.2	low affinity sulfate transporter 3	1.18
Qrob_T0369770.2	cytochrome P450 94A1-like	1.18
Qrob_T0193550.2	protein RRNAD1, transcript variant X10	1.18
Qrob_T0026620.2	cytochrome P450 89A2-like	1.18
Qrob_T0459830.2	phospholipase SGR2-like	1.18
Qrob_T0664560.2	uncharacterized LOC115971245, transcript variant X2	1.18
Qrob_T0178530.2	auxin-responsive protein IAA26-like	1.17
Qrob_T0061490.2	uncharacterized LOC115963904	1.17
Qrob_T0703800.2	scopoletin glucosyltransferase-like	1.17
Qrob_T0603800.2	protein PIN-LIKES 7-like, transcript variant X2	1.17
Qrob_T0016460.2	probable serine/threonine-protein kinase WNK9	1.17
Qrob_T0517420.2	serine/threonine-protein kinase prp4-like, transcript variant X3	1.17
Qrob_T0502640.2	geraniol 8-hydroxylase-like	1.17
Qrob_T0457800.2	uncharacterized LOC115957408	1.17
Qrob_T0573780.2	transcription factor bHLH130-like, transcript variant X5	1.17
Qrob_T0263780.2	uncharacterized LOC115965853	1.17
Qrob_T0649520.2	cytochrome P450 94C1-like	1.17
Qrob_T0358480.2	pentatricopeptide repeat-containing protein At1g30610, chloroplastic-like, transcript variant X1	1.17
Qrob_T0290120.2	uncharacterized LOC115968835	1.17
Qrob_T0496460.2	potassium transporter 4	1.16
Qrob_T0507200.2	epoxide hydrolase A-like	1.16
Qrob_T0655610.2	tubby-like F-box protein 7, transcript variant X2	1.16
Qrob_T0177420.2	protein TIME FOR COFFEE, transcript variant X1	1.16
Qrob_T0693390.2	protein SRG1-like	1.16
Qrob_T0343750.2	agamous-like MADS-box protein AGL27, transcript variant X2	1.16
Qrob_T0437710.2	protein OVEREXPRESSOR OF CATIONIC PEROXIDASE 3	1.16
Qrob_T0264730.2	E3 ubiquitin-protein ligase PUB23	1.16
Qrob_T0147330.2		1.16
Qrob_T0207170.2	branched-chain-amino-acid aminotransferase 6-like	1.16
Qrob_T0103760.2		1.16
Qrob_T0670310.2	glutathione S-transferase U10-like	1.15
Qrob_T0413190.2	uncharacterized LOC115972036	1.15
Qrob_T0298510.2	E3 ubiquitin-protein ligase RGLG2-like, transcript variant X3	1.15
Qrob_T0499840.2		1.15
Qrob_T0595030.2	malate dehydrogenase, cytoplasmic-like, transcript variant X1	1.15
Qrob_T0751360.2	CO(2)-response secreted protease-like	1.15
Qrob_T0164860.2	65-kDa microtubule-associated protein 1-like	1.15
Qrob_T0705560.2	ascorbate transporter, chloroplastic-like	1.15
Qrob_T0068730.2	dof zinc finger protein DOF3.2-like	1.15
Qrob_T0378940.2	inactive beta-amylase 4, chloroplastic, transcript variant X1	1.15
Qrob_T0187860.2	SUN domain-containing protein 1-like	1.15
Qrob_T0194900.2	cytochrome P450 81E8-like	1.15
Qrob_T0467050.2		1.15
Qrob_T0598340.2	uncharacterized LOC115971641	1.14
Qrob_T0188690.2	4-hydroxyphenylpyruvate dioxygenase-like	1.14
Qrob_T0044150.2	citrate synthase, glyoxysomal	1.14
Qrob_T0126590.2	ribosome biogenesis protein NOP53	1.14
Qrob_T0478540.2	probable glutathione S-transferase	1.14
Qrob_T0676340.2	uncharacterized LOC115974511	1.14
Qrob_T0010540.2		1.14
Qrob_T0693380.2	protein SRG1-like, transcript variant X2	1.14
Qrob_T0522090.2	tRNA-dihydrouridine(47) synthase [NAD(P)(+)]-like	1.14
Qrob_T0363890.2	protein NO VEIN-like, transcript variant X3	1.14
Qrob_T0279360.2	putative leucine-rich repeat receptor-like serine/threonine-protein kinase At2g14440	1.14
Qrob_T0706970.2		1.14
Qrob_T0649410.2	transcription initiation factor TFIID subunit 12, transcript variant X2	1.14
Qrob_T0731580.2	protein RRP6-like 3, transcript variant X1	1.14
Qrob_T0682220.2	germin-like protein subfamily 1 member 7	1.14
Qrob_T0255820.2	multiple RNA-binding domain-containing protein 1	1.14
Qrob_T0687300.2	scopoletin glucosyltransferase-like	1.14
Qrob_T0571960.2		1.14
Qrob_T0187440.2		1.14
Qrob_T0011280.2	putative late blight resistance protein homolog R1B-8	1.14
Qrob_T0544180.2	2-oxoisovalerate dehydrogenase subunit alpha 2, mitochondrial-like	1.13
Qrob_T0418100.2	1-aminocyclopropane-1-carboxylate oxidase homolog 4-like	1.13
Qrob_T0517790.2	uncharacterized LOC115976129, transcript variant X1	1.13
Qrob_T0697650.2	uncharacterized LOC115974104, transcript variant X5	1.13
Qrob_T0353470.2	probable isoprenylcysteine alpha-carbonyl methylesterase ICMEL1	1.13
Qrob_T0294450.2	zinc finger CCCH domain-containing protein 1-like	1.13
Qrob_T0622180.2		1.13
Qrob_T0004150.2	dehydration-responsive element-binding protein 2C-like, transcript variant X2	1.13
Qrob_T0057990.2	probable E3 ubiquitin-protein ligase RNF217	1.13
Qrob_T0509170.2	uncharacterized LOC115965465	1.13
Qrob_T0474600.2	probable WRKY transcription factor 31	1.12
Qrob_T0136660.2	heterogeneous nuclear ribonucleoprotein R, transcript variant X2	1.12
Qrob_T0438250.2	5'-adenylylsulfate reductase 3, chloroplastic-like	1.12
Qrob_T0494900.2	uncharacterized LOC115992401, transcript variant X2	1.12
Qrob_T0287020.2	acyl-coenzyme A thioesterase 13-like	1.12
Qrob_T0528660.2		1.12
Qrob_T0104410.2	DEAD-box ATP-dependent RNA helicase 27-like	1.12
Qrob_T0363870.2	protein NO VEIN-like, transcript variant X2	1.12
Qrob_T0461000.2	pathogenesis-related protein 1-like	1.12
Qrob_T0479320.2	pentatricopeptide repeat-containing protein At4g26680, mitochondrial-like	1.12
Qrob_T0247280.2	premnaspirodiene oxygenase-like	1.12
Qrob_T0220760.2	UPF0481 protein At3g47200-like, transcript variant X1	1.12
Qrob_T0472310.2	chloride channel protein CLC-e, transcript variant X2	1.12
Qrob_T0409730.2	protein MOS2-like	1.11
Qrob_T0299770.2		1.11
Qrob_T0216580.2		1.11
Qrob_T0241480.2	serine/threonine-protein kinase AtPK1/AtPK6-like	1.11
Qrob_T0052920.2	5'-adenylylsulfate reductase 1, chloroplastic-like	1.11
Qrob_T0248350.2	scarecrow-like protein 34	1.11
Qrob_T0536490.2	germin-like protein subfamily 1 member 7	1.11
Qrob_T0480100.2	disease resistance protein RPM1-like	1.11
Qrob_T0632120.2	uncharacterized protein At4g08330, chloroplastic	1.11
Qrob_T0227960.2	bromodomain-containing protein 2-like, transcript variant X3	1.11
Qrob_T0459230.2	ethylene-responsive transcription factor ERF113, transcript variant X1	1.11
Qrob_T0541520.2	legumain, transcript variant X2	1.11
Qrob_T0115550.2	calcium homeostasis endoplasmic reticulum protein, transcript variant X4	1.11
Qrob_T0467020.2		1.11
Qrob_T0712250.2	uncharacterized LOC115989111, transcript variant X1	1.11
Qrob_T0451100.2	serine/threonine-protein kinase CTR1, transcript variant X1	1.11
Qrob_T0236980.2	uncharacterized protein At5g39865	1.11
Qrob_T0314750.2		1.11
Qrob_T0416520.2		1.11
Qrob_T0370770.2	pentatricopeptide repeat-containing protein At5g66520-like	1.11
Qrob_T0483750.2	protein NRT1/ PTR FAMILY 6.1	1.11
Qrob_T0564850.2	death-inducer obliterator 1-like	1.1
Qrob_T0058520.2		1.1
Qrob_T0707850.2	uncharacterized LOC115967292	1.1
Qrob_T0550150.2	glutathione S-transferase U8-like	1.1
Qrob_T0649990.2	adenine nucleotide transporter BT1, chloroplastic/mitochondrial-like	1.1
Qrob_T0432090.2	lysine-specific demethylase JMJ30, transcript variant X1	1.1
Qrob_T0170610.2	abscisic acid 8'-hydroxylase 4	1.1
Qrob_T0281570.2	uncharacterized LOC115988664, transcript variant X1	1.1
Qrob_T0222480.2	nucleolar MIF4G domain-containing protein 1, transcript variant X2	1.1
Qrob_T0694570.2	F-box protein At2g27310-like	1.1
Qrob_T0053020.2		1.1
Qrob_T0498250.2		1.1
Qrob_T0705510.2	signal peptide peptidase-like 4	1.09
Qrob_T0288720.2	crocetin glucosyltransferase, chloroplastic-like	1.09
Qrob_T0714480.2	enoyl-CoA delta isomerase 1, peroxisomal-like	1.09
Qrob_T0245400.2		1.09
Qrob_T0391780.2	cryptochrome-1, transcript variant X2	1.09
Qrob_T0411820.2	transcription repressor MYB5-like	1.09
Qrob_T0007900.2	transmembrane protein 45B	1.09
Qrob_T0178920.2	putative UDP-glucuronate:xylan alpha-glucuronosyltransferase 4	1.09
Qrob_T0410560.2	ent-kaurenoic acid oxidase 1-like, transcript variant X1	1.09
Qrob_T0353090.2		1.09
Qrob_T0461690.2	E3 ubiquitin-protein ligase KEG-like	1.08
Qrob_T0265930.2	uncharacterized LOC115952793	1.08
Qrob_T0062770.2		1.08
Qrob_T0362830.2	E3 ubiquitin-protein ligase BRE1-like 2, transcript variant X4	1.08
Qrob_T0011880.2	transcription factor TGA6, transcript variant X1	1.08
Qrob_T0305840.2	heterogeneous nuclear ribonucleoprotein U-like protein 1	1.08
Qrob_T0572020.2		1.08
Qrob_T0115630.2	transcription repressor MYB5-like	1.08
Qrob_T0466340.2	protein PHOX1-like	1.08
Qrob_T0180510.2		1.08
Qrob_T0188580.2	putative pentatricopeptide repeat-containing protein At1g16830, transcript variant X2	1.08
Qrob_T0380300.2	probable LRR receptor-like serine/threonine-protein kinase At1g56140, transcript variant X1	1.08
Qrob_T0545220.2	plastid-lipid-associated protein, chloroplastic-like	1.07
Qrob_T0568750.2		1.07
Qrob_T0202320.2	NAC domain-containing protein 1	1.07
Qrob_T0221560.2	glycerol kinase-like	1.07
Qrob_T0152140.2	uncharacterized LOC115971509, transcript variant X1	1.07
Qrob_T0633980.2	TATA-binding protein-associated factor BTAF1, transcript variant X2	1.07
Qrob_T0633210.2		1.07
Qrob_T0383370.2		1.07
Qrob_T0727810.2	60S ribosomal protein L7-1-like	1.07
Qrob_T0293020.2		1.07
Qrob_T0556130.2	disease resistance protein At4g27190-like	1.07
Qrob_T0034300.2	pentatricopeptide repeat-containing protein At4g01030, mitochondrial	1.07
Qrob_T0265350.2	histone-lysine N-methyltransferase ATXR4, transcript variant X2	1.07
Qrob_T0021870.2	MDIS1-interacting receptor like kinase 2-like	1.07
Qrob_T0449180.2	CBL-interacting serine/threonine-protein kinase 14-like	1.06
Qrob_T0226590.2	F-box/kelch-repeat protein At3g06240-like	1.06
Qrob_T0522690.2	chalcone synthase	1.06
Qrob_T0390650.2	transcription initiation factor IIB-like	1.06
Qrob_T0140980.2	protein CutA, chloroplastic	1.06
Qrob_T0238620.2	protein STRICTOSIDINE SYNTHASE-LIKE 5-like	1.06
Qrob_T0225990.2	putative F-box protein At1g49610, transcript variant X2	1.06
Qrob_T0112370.2	uncharacterized zinc finger CCHC domain-containing protein At4g19190	1.06
Qrob_T0032260.2	RAP domain-containing protein, chloroplastic-like	1.06
Qrob_T0721900.2	RNA pseudouridine synthase 3, mitochondrial, transcript variant X2	1.06
Qrob_T0131780.2	grpE protein homolog 2, mitochondrial-like, transcript variant X1	1.06
Qrob_T0354530.2	U4/U6.U5 tri-snRNP-associated protein 2-like, transcript variant X2	1.06
Qrob_T0423500.2	protein MLN51 homolog, transcript variant X1	1.06
Qrob_T0380360.2	probable galacturonosyltransferase 11	1.06
Qrob_T0121170.2	protein LOW PHOTOSYNTHETIC EFFICIENCY 1, chloroplastic-like	1.06
Qrob_T0318310.2	cytochrome P450 CYP82D47-like	1.05
Qrob_T0590760.2	bifunctional UDP-glucose 4-epimerase and UDP-xylose 4-epimerase 1	1.05
Qrob_T0650110.2	uncharacterized LOC115956845	1.05
Qrob_T0735020.2	uncharacterized LOC115967862, transcript variant X2	1.05
Qrob_T0656500.2	probable serine/threonine-protein kinase WNK11, transcript variant X2	1.05
Qrob_T0260910.2	two-component response regulator-like APRR3	1.05
Qrob_T0455130.2		1.05
Qrob_T0563250.2	amino acid transporter AVT1A, transcript variant X1	1.05
Qrob_T0072770.2	zinc finger protein CONSTANS-LIKE 3, transcript variant X1	1.05
Qrob_T0597830.2	heat stress transcription factor A-4b-like	1.05
Qrob_T0705520.2	SKP1-like protein 21, transcript variant X4	1.05
Qrob_T0069010.2	transcription factor IIIB 60 kDa subunit-like, transcript variant X5	1.05
Qrob_T0622870.2	UDP-glycosyltransferase 89A2-like, transcript variant X2	1.05
Qrob_T0706980.2		1.05
Qrob_T0545330.2	probable serine/threonine-protein kinase At1g54610	1.04
Qrob_T0689960.2	uncharacterized LOC115995076	1.04
Qrob_T0216840.2	probable protein phosphatase 2C 13	1.04
Qrob_T0761190.2	transcription initiation factor TFIID subunit 2, transcript variant X2	1.04
Qrob_T0424740.2	sugar transporter ERD6-like 7, transcript variant X2	1.04
Qrob_T0361130.2		1.04
Qrob_T0010260.2	uncharacterized LOC115975690, transcript variant X2	1.04
Qrob_T0001040.2	putative disease resistance protein At1g50180	1.04
Qrob_T0286050.2	SWR1 complex subunit 2, transcript variant X2	1.04
Qrob_T0210180.2	bifunctional riboflavin biosynthesis protein RIBA 1, chloroplastic-like, transcript variant X2	1.04
Qrob_T0588980.2	protein unc-45 homolog A	1.04
Qrob_T0255830.2	multiple RNA-binding domain-containing protein 1	1.04
Qrob_T0424560.2		1.04
Qrob_T0288900.2	zinc finger CCCH domain-containing protein 18-like, transcript variant X1	1.03
Qrob_T0611760.2	AP2/ERF and B3 domain-containing transcription factor RAV1-like	1.03
Qrob_T0059850.2	F-box protein At1g47056-like	1.03
Qrob_T0161430.2		1.03
Qrob_T0021900.2	U-box domain-containing protein 11-like	1.03
Qrob_T0643310.2	formin-like protein 5	1.03
Qrob_T0687660.2	auxin-responsive protein SAUR32-like	1.03
Qrob_T0533830.2		1.03
Qrob_T0026910.2	dnAJ-like protein slr0093, transcript variant X2	1.03
Qrob_T0265740.2	D-lactate dehydrogenase [cytochrome], mitochondrial-like	1.03
Qrob_T0142030.2		1.03
Qrob_T0265910.2	pentatricopeptide repeat-containing protein At3g09650, chloroplastic	1.03
Qrob_T0188590.2	transcription factor JUNGBRUNNEN 1-like, transcript variant X1	1.03
Qrob_T0466000.2	rust resistance kinase Lr10-like	1.03
Qrob_T0455110.2		1.03
Qrob_T0378000.2	receptor-like protein 7	1.03
Qrob_T0487490.2		1.03
Qrob_T0158960.2	probable amidase At4g34880, transcript variant X1	1.03
Qrob_T0666710.2	chaperone protein dnaJ 11, chloroplastic-like	1.02
Qrob_T0456480.2	ethylene-responsive transcription factor ERF113-like	1.02
Qrob_T0252170.2		1.02
Qrob_T0727770.2	transcription factor MYB1R1-like	1.02
Qrob_T0343440.2	auxin-responsive protein SAUR36-like	1.02
Qrob_T0248410.2	scarecrow-like protein 30	1.02
Qrob_T0088670.2	polyadenylation and cleavage factor homolog 4, transcript variant X1	1.02
Qrob_T0474520.2	uncharacterized LOC115987480	1.02
Qrob_T0302550.2	RNA-binding protein 34	1.02
Qrob_T0521280.2	IAA-amino acid hydrolase ILR1-like 4	1.02
Qrob_T0759050.2	uncharacterized LOC115994342	1.02
Qrob_T0657040.2		1.02
Qrob_T0402930.2	uncharacterized LOC115957533, transcript variant X2	1.02
Qrob_T0210170.2	bifunctional riboflavin biosynthesis protein RIBA 1, chloroplastic-like, transcript variant X1	1.02
Qrob_T0584930.2	putative F-box protein At1g49610	1.02
Qrob_T0666680.2	uncharacterized LOC115974501, transcript variant X1	1.02
Qrob_T0070260.2	germin-like protein subfamily T member 2	1.02
Qrob_T0379700.2	DEAD-box ATP-dependent RNA helicase 13, transcript variant X2	1.02
Qrob_T0527980.2	UPF0481 protein At3g47200-like	1.02
Qrob_T0470510.2	vacuolar protein sorting-associated protein 45 homolog, transcript variant X1	1.02
Qrob_T0386860.2	uncharacterized protein At4g37920	1.02
Qrob_T0514130.2	polyadenylate-binding protein 2	1.02
Qrob_T0728510.2	acyl-coenzyme A oxidase 4, peroxisomal	1.01
Qrob_T0145250.2	splicing factor-like protein 1	1.01
Qrob_T0071250.2	FIP1[V]-like protein, transcript variant X1	1.01
Qrob_T0514830.2	uncharacterized LOC115982631	1.01
Qrob_T0398170.2	zinc finger protein ZAT12-like	1.01
Qrob_T0216310.2	CBL-interacting serine/threonine-protein kinase 1, transcript variant X2	1.01
Qrob_T0652500.2	phosphatidylinositol-3-phosphatase myotubularin-1-like, transcript variant X3	1.01
Qrob_T0210300.2	putative clathrin assembly protein At4g40080	1.01
Qrob_T0479650.2	protein TSS	1.01
Qrob_T0004270.2	protein RETICULATA-RELATED 5, chloroplastic-like	1.01
Qrob_T0026680.2	cytochrome P450 89A2-like	1.01
Qrob_T0442280.2	F-box protein SKIP22-like	1
Qrob_T0243880.2	delta(3,5)-Delta(2,4)-dienoyl-CoA isomerase, peroxisomal, transcript variant X1	1
Qrob_T0345140.2	G-type lectin S-receptor-like serine/threonine-protein kinase SD1-1, transcript variant X1	1
Qrob_T0423360.2	multiprotein-bridging factor 1c	1
Qrob_T0152990.2		1
Qrob_T0256160.2	NADPH-dependent aldo-keto reductase, chloroplastic-like	1
Qrob_T0350130.2	DNA-directed RNA polymerases II and IV subunit 5A-like, transcript variant X4	1
Qrob_T0310920.2		1
Qrob_T0612260.2	transcription factor RAX3-like	1
Qrob_T0113990.2	4-coumarate--CoA ligase-like 9	1
Qrob_T0512850.2	exportin-T	1
Qrob_T0600180.2		1
Qrob_T0026610.2	cytochrome P450 89A2-like	1
Qrob_T0593740.2		0.99
Qrob_T0087270.2	protein LNK3	0.99
Qrob_T0499120.2	FACT complex subunit SPT16-like, transcript variant X4	0.99
Qrob_T0057830.2	60S ribosomal export protein NMD3, transcript variant X2	0.99
Qrob_T0157030.2	protein HSH49, transcript variant X1	0.99
Qrob_T0698170.2	endoribonuclease YBEY, chloroplastic	0.99
Qrob_T0418650.2	glutathione transferase GST 23-like	0.99
Qrob_T0514670.2	APO protein 3, mitochondrial-like, transcript variant X2	0.99
Qrob_T0005700.2	serine/threonine-protein kinase ATM, transcript variant X1	0.99
Qrob_T0577340.2	U11/U12 small nuclear ribonucleoprotein 35 kDa protein, transcript variant X1	0.99
Qrob_T0349680.2	cyclic dof factor 1-like	0.99
Qrob_T0354480.2		0.99
Qrob_T0536570.2	protease Do-like 9	0.99
Qrob_T0698880.2	plant intracellular Ras-group-related LRR protein 5-like	0.98
Qrob_T0359030.2		0.98
Qrob_T0383550.2	pre-mRNA-splicing factor ATP-dependent RNA helicase DEAH7-like	0.98
Qrob_T0523050.2	coiled-coil domain-containing protein 97	0.98
Qrob_T0554050.2	uncharacterized LOC115960105	0.98
Qrob_T0509140.2	4-coumarate--CoA ligase-like 9	0.98
Qrob_T0261000.2	zinc finger CCCH domain-containing protein 11-like, transcript variant X2	0.98
Qrob_T0349780.2	O-fucosyltransferase 16-like	0.98
Qrob_T0481920.2	tropinone reductase homolog At2g29170-like	0.98
Qrob_T0073740.2	pectin acetylesterase 8-like, transcript variant X2	0.98
Qrob_T0142570.2		0.98
Qrob_T0523580.2	pleiotropic drug resistance protein 1-like	0.98
Qrob_T0534120.2	protein MKS1-like	0.98
Qrob_T0497760.2		0.98
Qrob_T0073260.2	probable purine permease 10, transcript variant X1	0.98
Qrob_T0559890.2	transcription factor PCL1, transcript variant X2	0.98
Qrob_T0531000.2	putative F-box/FBD/LRR-repeat protein At1g78840, transcript variant X1	0.98
Qrob_T0418270.2	calmodulin-binding transcription activator 3-like, transcript variant X4	0.98
Qrob_T0455340.2	UDP-glucose iridoid glucosyltransferase-like	0.98
Qrob_T0176920.2	DNA-directed RNA polymerase III subunit RPC5	0.98
Qrob_T0470360.2	alcohol dehydrogenase-like	0.97
Qrob_T0560850.2	ethylene-responsive transcription factor ERF105-like	0.97
Qrob_T0697030.2	WRKY transcription factor 23-like	0.97
Qrob_T0424210.2	probable transcriptional regulator SLK2, transcript variant X3	0.97
Qrob_T0257270.2	pre-mRNA-splicing factor CWC22 homolog, transcript variant X2	0.97
Qrob_T0264750.2	protein EMBRYONIC FLOWER 1, transcript variant X4	0.97
Qrob_T0077940.2	U11/U12 small nuclear ribonucleoprotein 31 kDa protein	0.97
Qrob_T0446450.2	clathrin light chain 1	0.97
Qrob_T0321280.2	myosin-17-like, transcript variant X1	0.97
Qrob_T0714300.2	cyclin-dependent protein kinase inhibitor SMR11-like	0.97
Qrob_T0222700.2	nucleolar MIF4G domain-containing protein 1, transcript variant X2	0.97
Qrob_T0390580.2	probable RNA methyltransferase At5g51130, transcript variant X3	0.97
Qrob_T0597790.2	putative receptor-like protein kinase At4g00960, transcript variant X1	0.97
Qrob_T0399180.2	putative lysozyme-like protein	0.97
Qrob_T0241930.2	uncharacterized LOC115951261	0.97
Qrob_T0532980.2	methyltransferase-like protein 2, transcript variant X1	0.97
Qrob_T0334910.2	uncharacterized LOC115959845	0.97
Qrob_T0181370.2	actin cytoskeleton-regulatory complex protein PAN1, transcript variant X3	0.97
Qrob_T0379690.2	DEAD-box ATP-dependent RNA helicase 13, transcript variant X1	0.97
Qrob_T0144520.2	probable xyloglucan endotransglucosylase/hydrolase protein 30	0.96
Qrob_T0162910.2	nicotinate phosphoribosyltransferase 1-like, transcript variant X2	0.96
Qrob_T0573220.2	thiamine thiazole synthase, chloroplastic-like	0.96
Qrob_T0509200.2	cyclin-dependent kinase G-2-like, transcript variant X3	0.96
Qrob_T0025260.2	transcription factor MYC2-like	0.96
Qrob_T0176250.2	protein DETOXIFICATION 18-like	0.96
Qrob_T0047240.2	probable boron transporter 2	0.96
Qrob_T0243830.2	uncharacterized protein At2g33490, transcript variant X3	0.96
Qrob_T0435860.2		0.96
Qrob_T0426340.2	E3 ubiquitin-protein ligase BRE1-like 1, transcript variant X1	0.96
Qrob_T0662810.2	uncharacterized LOC115971303	0.96
Qrob_T0609850.2	F-box protein SKIP14	0.96
Qrob_T0454520.2	pentatricopeptide repeat-containing protein At1g08610, transcript variant X2	0.96
Qrob_T0337760.2	patatin-like protein 2	0.96
Qrob_T0424730.2	probable LRR receptor-like serine/threonine-protein kinase RKF3	0.96
Qrob_T0248190.2	probable xyloglucan galactosyltransferase GT11	0.96
Qrob_T0412520.2	uncharacterized LOC115991963, transcript variant X7	0.96
Qrob_T0590620.2		0.96
Qrob_T0351020.2	protein NRT1/ PTR FAMILY 5.2-like	0.95
Qrob_T0076410.2	uncharacterized protein At5g19025	0.95
Qrob_T0538420.2	uncharacterized LOC115971208, transcript variant X3	0.95
Qrob_T0249030.2		0.95
Qrob_T0262240.2	protein DMP2-like	0.95
Qrob_T0467840.2		0.95
Qrob_T0648160.2	zinc finger CCHC domain-containing protein 7, transcript variant X2	0.95
Qrob_T0742510.2	GDSL esterase/lipase At4g10955-like	0.95
Qrob_T0128370.2	uncharacterized LOC115960141, transcript variant X1	0.95
Qrob_T0316530.2	guanylate-binding protein 2	0.95
Qrob_T0740560.2		0.95
Qrob_T0365010.2	potassium channel AKT1-like, transcript variant X1	0.95
Qrob_T0100770.2		0.95
Qrob_T0336960.2	uncharacterized LOC115952425	0.94
Qrob_T0313190.2	putative RNA polymerase II subunit B1 CTD phosphatase RPAP2 homolog, transcript variant X1	0.94
Qrob_T0142110.2	uncharacterized LOC115953321	0.94
Qrob_T0573100.2	trihelix transcription factor ASIL2-like, transcript variant X1	0.94
Qrob_T0486660.2	UPF0496 protein 4-like	0.94
Qrob_T0313130.2	fra a 1-associated protein, transcript variant X2	0.94
Qrob_T0193080.2	WD repeat-containing protein 44-like, transcript variant X2	0.94
Qrob_T0208740.2	uncharacterized LOC115979857, transcript variant X3	0.94
Qrob_T0678470.2	flagellar radial spoke protein 5	0.94
Qrob_T0525910.2	zinc finger RNA-binding protein 2-like, transcript variant X2	0.94
Qrob_T0379710.2	DEAD-box ATP-dependent RNA helicase 13, transcript variant X2	0.94
Qrob_T0462200.2		0.94
Qrob_T0482610.2	probable inorganic phosphate transporter 1-9	0.94
Qrob_T0666840.2	uncharacterized LOC115965537	0.94
Qrob_T0285540.2	uncharacterized protein At1g51745, transcript variant X2	0.94
Qrob_T0010530.2	transmembrane protein 45B	0.94
Qrob_T0044830.2	protein ANTI-SILENCING 1, transcript variant X5	0.94
Qrob_T0191890.2	metal transporter Nramp5-like	0.94
Qrob_T0066990.2	F-box protein SKIP28-like	0.94
Qrob_T0084630.2	tRNA ligase 1, transcript variant X3	0.94
Qrob_T0723440.2	sulfiredoxin, chloroplastic/mitochondrial	0.94
Qrob_T0762220.2	R3H domain-containing protein 1	0.93
Qrob_T0111510.2	YTH domain-containing protein ECT4-like, transcript variant X1	0.93
Qrob_T0519140.2	uncharacterized LOC115988496	0.93
Qrob_T0715520.2	glutamate receptor 3.7-like, transcript variant X1	0.93
Qrob_T0071260.2	ABC transporter I family member 1	0.93
Qrob_T0235540.2	probable adenylate kinase 7, mitochondrial	0.93
Qrob_T0328110.2	uncharacterized LOC115970616	0.93
Qrob_T0240870.2	protein LURP-one-related 8-like	0.93
Qrob_T0675710.2	loganic acid O-methyltransferase-like	0.93
Qrob_T0034290.2	protein WHAT'S THIS FACTOR 1 homolog, chloroplastic	0.93
Qrob_T0725180.2	uncharacterized LOC115972464, transcript variant X3	0.93
Qrob_T0280580.2		0.93
Qrob_T0403510.2	scopoletin glucosyltransferase-like	0.93
Qrob_T0486420.2	uncharacterized LOC115960417, transcript variant X7	0.93
Qrob_T0059050.2	uncharacterized LOC115964137	0.93
Qrob_T0471390.2	kinesin-like protein KIN-10C, transcript variant X2	0.93
Qrob_T0459010.2	uncharacterized LOC115963953, transcript variant X2	0.92
Qrob_T0207010.2	uncharacterized LOC115960975, transcript variant X2	0.92
Qrob_T0062610.2	calcium-transporting ATPase 4, plasma membrane-type-like	0.92
Qrob_T0195070.2	tetratricopeptide repeat protein 4 homolog	0.92
Qrob_T0112930.2	phosphatidylinositol transfer protein 3-like, transcript variant X2	0.92
Qrob_T0432830.2	peroxisomal membrane protein 11A-like	0.92
Qrob_T0131100.2	O-fucosyltransferase 19	0.92
Qrob_T0736210.2	chromatin modification-related protein EAF1, transcript variant X4	0.92
Qrob_T0399170.2	uncharacterized LOC115983265, transcript variant X2	0.92
Qrob_T0652520.2	phosphatidylinositol-3-phosphatase myotubularin-1-like, transcript variant X2	0.92
Qrob_T0694880.2		0.92
Qrob_T0397700.2	AP2/ERF domain-containing protein PFD0985w	0.92
Qrob_T0177310.2	12-oxophytodienoate reductase 2-like	0.92
Qrob_T0199170.2	ATP-dependent DNA helicase Q-like SIM, transcript variant X1	0.92
Qrob_T0097770.2	hydroquinone glucosyltransferase-like	0.92
Qrob_T0340080.2	serine/threonine-protein kinase-like protein At5g23170	0.92
Qrob_T0361720.2	polyubiquitin-like	0.91
Qrob_T0521310.2	dihydropyrimidinase-like	0.91
Qrob_T0132400.2	uncharacterized LOC115994075, transcript variant X3	0.91
Qrob_T0079170.2	uncharacterized LOC115987310	0.91
Qrob_T0609870.2	cytosolic Fe-S cluster assembly factor NBP35-like	0.91
Qrob_T0538560.2	E3 ubiquitin ligase PQT3-like, transcript variant X1	0.91
Qrob_T0033620.2	O-glucosyltransferase rumi homolog	0.91
Qrob_T0476550.2	histone H2A deubiquitinase MYSM1, transcript variant X1	0.91
Qrob_T0575360.2		0.91
Qrob_T0412550.2	DNA-directed RNA polymerase I subunit 1	0.91
Qrob_T0552280.2	cyclin-dependent kinase inhibitor 4-like	0.91
Qrob_T0281560.2	scarecrow-like protein 13, transcript variant X2	0.91
Qrob_T0280120.2	probable serine/threonine-protein kinase WNK4, transcript variant X1	0.91
Qrob_T0714920.2	NAC domain-containing protein 2-like	0.91
Qrob_T0170440.2	polygalacturonase-1 non-catalytic subunit beta-like	0.91
Qrob_T0489110.2	uncharacterized LOC115972271, transcript variant X1	0.91
Qrob_T0360110.2		0.91
Qrob_T0347520.2	protein trichome birefringence-like 5	0.91
Qrob_T0584580.2	endonuclease MutS2	0.91
Qrob_T0536700.2	serine/threonine-protein kinase fray2, transcript variant X1	0.91
Qrob_T0175360.2	D-ribulose kinase, transcript variant X2	0.91
Qrob_T0014410.2	ethylene-responsive transcription factor ERF024-like	0.91
Qrob_T0280100.2	superoxide dismutase [Mn], mitochondrial-like	0.91
Qrob_T0237300.2	protein MAK16 homolog, transcript variant X3	0.91
Qrob_T0694590.2	putative 4-hydroxy-4-methyl-2-oxoglutarate aldolase 3, transcript variant X2	0.9
Qrob_T0200060.2		0.9
Qrob_T0041580.2	serine/arginine repetitive matrix protein 2, transcript variant X4	0.9
Qrob_T0438410.2	universal stress protein PHOS32-like, transcript variant X2	0.9
Qrob_T0461350.2	protein SPA1-RELATED 2, transcript variant X1	0.9
Qrob_T0000690.2	endoribonuclease Dicer homolog 2, transcript variant X5	0.9
Qrob_T0156420.2	uncharacterized LOC115977644, transcript variant X2	0.9
Qrob_T0297860.2	protein SLOW WALKER 1-like	0.9
Qrob_T0598360.2	lecithin-cholesterol acyltransferase-like 1	0.9
Qrob_T0698300.2	uncharacterized LOC115991994, transcript variant X2	0.9
Qrob_T0123840.2	S-norcoclaurine synthase 2-like	0.9
Qrob_T0255840.2	multiple RNA-binding domain-containing protein 1	0.9
Qrob_T0689680.2	lon protease 2-like, transcript variant X2	0.9
Qrob_T0328490.2	protein PALE CRESS, chloroplastic-like	0.9
Qrob_T0409660.2	protein unc-45 homolog A	0.9
Qrob_T0212450.2	putative esterase/lipase HI_0193	0.9
Qrob_T0601510.2	ribulose-1,5 bisphosphate carboxylase/oxygenase large subunit N-methyltransferase, chloroplastic, transcript variant X1	0.9
Qrob_T0092690.2	protein PHLOEM PROTEIN 2-LIKE A1-like	0.9
Qrob_T0448480.2	catalase isozyme 3-like, transcript variant X1	0.89
Qrob_T0745280.2	histone H3.3	0.89
Qrob_T0080450.2	transcription factor KUA1	0.89
Qrob_T0477470.2	uncharacterized LOC115968924	0.89
Qrob_T0589090.2		0.89
Qrob_T0533840.2	uncharacterized LOC115975162	0.89
Qrob_T0147750.2	nuclear pore complex protein NUP1-like, transcript variant X1	0.89
Qrob_T0114790.2		0.89
Qrob_T0251660.2	uncharacterized LOC115969642	0.89
Qrob_T0497710.2	myeloid leukemia factor 1	0.89
Qrob_T0067680.2	two-component response regulator ORR21-like	0.89
Qrob_T0333000.2	ABC transporter B family member 25, mitochondrial	0.89
Qrob_T0178670.2	MMS19 nucleotide excision repair protein homolog, transcript variant X2	0.89
Qrob_T0713190.2	major allergen Pru ar 1-like	0.89
Qrob_T0622490.2	G-type lectin S-receptor-like serine/threonine-protein kinase At4g27290, transcript variant X1	0.89
Qrob_T0529630.2	putative methyltransferase DDB_G0268948	0.89
Qrob_T0577180.2	autophagy-related protein 18b	0.89
Qrob_T0685930.2	symplekin, transcript variant X2	0.89
Qrob_T0483870.2	uncharacterized LOC115982038, transcript variant X3	0.89
Qrob_T0061510.2	UPF0481 protein At3g47200-like	0.89
Qrob_T0482780.2	cinnamoyl-CoA reductase 2-like	0.88
Qrob_T0362270.2	eukaryotic initiation factor 4A-11-like	0.88
Qrob_T0076400.2	cyclic dof factor 2-like	0.88
Qrob_T0384420.2	WAT1-related protein At5g40230-like, transcript variant X2	0.88
Qrob_T0370950.2	NAC domain-containing protein 87-like	0.88
Qrob_T0404190.2		0.88
Qrob_T0280110.2	uncharacterized LOC115951421	0.88
Qrob_T0098840.2	glutamic acid-rich protein-like	0.88
Qrob_T0090450.2	F-box/kelch-repeat protein At1g57790-like, transcript variant X3	0.88
Qrob_T0120040.2	ferredoxin-thioredoxin reductase, variable chain, chloroplastic-like	0.88
Qrob_T0038780.2	protein gar2	0.88
Qrob_T0638570.2	probable flavin-containing monooxygenase 1	0.88
Qrob_T0751150.2	uncharacterized LOC115972173, transcript variant X3	0.88
Qrob_T0559030.2	peter Pan-like protein	0.88
Qrob_T0041360.2	universal stress protein PHOS32-like	0.88
Qrob_T0400990.2		0.88
Qrob_T0542330.2	general transcription factor 3C polypeptide 3, transcript variant X3	0.88
Qrob_T0512090.2	pentatricopeptide repeat-containing protein At4g16835, mitochondrial, transcript variant X2	0.88
Qrob_T0208530.2	thioredoxin reductase NTRB-like, transcript variant X5	0.88
Qrob_T0078730.2	protein TRANSPARENT TESTA 9, transcript variant X1	0.88
Qrob_T0361030.2	uncharacterized LOC115965520	0.87
Qrob_T0080480.2	peroxisomal acyl-coenzyme A oxidase 1-like	0.87
Qrob_T0619620.2	5'-3' exoribonuclease 3, transcript variant X1	0.87
Qrob_T0433130.2	protein ESSENTIAL FOR POTEXVIRUS ACCUMULATION 1, transcript variant X2	0.87
Qrob_T0598430.2	serine/threonine-protein kinase BSK1	0.87
Qrob_T0674970.2	zinc finger CCCH domain-containing protein 13	0.87
Qrob_T0732000.2	breast cancer type 1 susceptibility protein homolog, transcript variant X2	0.87
Qrob_T0387010.2	synaptotagmin-1-like, transcript variant X1	0.87
Qrob_T0310410.2	chaperone protein DnaJ-like, transcript variant X2	0.87
Qrob_T0536510.2	germin-like protein subfamily 1 member 7	0.87
Qrob_T0458890.2	protein FRIGIDA	0.87
Qrob_T0600360.2	uncharacterized protein At1g21580, transcript variant X1	0.87
Qrob_T0603780.2	MLO-like protein 10, transcript variant X1	0.87
Qrob_T0096850.2	protein ecdysoneless homolog, transcript variant X5	0.87
Qrob_T0178510.2	nuclear poly(A) polymerase 4-like, transcript variant X4	0.87
Qrob_T0285650.2	protein MODIFYING WALL LIGNIN-1-like	0.87
Qrob_T0082940.2		0.87
Qrob_T0237500.2	DNA repair protein RAD16	0.87
Qrob_T0573000.2	heavy metal-associated isoprenylated plant protein 28-like	0.87
Qrob_T0583370.2	probable inactive protein kinase At3g63330, transcript variant X1	0.87
Qrob_T0043040.2	G-type lectin S-receptor-like serine/threonine-protein kinase LECRK3	0.87
Qrob_T0365090.2	uncharacterized LOC115976862, transcript variant X3	0.87
Qrob_T0112340.2	uncharacterized zinc finger CCHC domain-containing protein At4g19190	0.87
Qrob_T0335220.2		0.87
Qrob_T0528720.2	DEAD-box ATP-dependent RNA helicase 39-like	0.87
Qrob_T0473050.2	N-acylneuraminate-9-phosphatase	0.87
Qrob_T0335800.2	general transcription factor 3C polypeptide 6, transcript variant X2	0.87
Qrob_T0640830.2	UDP-glycosyltransferase 73E1-like	0.87
Qrob_T0020350.2	protein WHAT'S THIS FACTOR 1 homolog, chloroplastic	0.87
Qrob_T0724950.2		0.86
Qrob_T0160680.2		0.86
Qrob_T0190660.2	uncharacterized LOC115989321, transcript variant X1	0.86
Qrob_T0196370.2	ABC transporter B family member 11-like, transcript variant X3	0.86
Qrob_T0308240.2	polyubiquitin, transcript variant X2	0.86
Qrob_T0459220.2	mitochondrial import inner membrane translocase subunit PAM16 like 2	0.86
Qrob_T0595280.2	50S ribosomal protein L1, chloroplastic	0.86
Qrob_T0697600.2	protein PIN-LIKES 2	0.86
Qrob_T0615780.2	protein BCCIP homolog, transcript variant X2	0.86
Qrob_T0624160.2	serine/threonine-protein phosphatase 4 regulatory subunit 2, transcript variant X1	0.86
Qrob_T0257150.2	uncharacterized LOC115976008	0.86
Qrob_T0746150.2	probable LRR receptor-like serine/threonine-protein kinase At1g12460	0.86
Qrob_T0111360.2		0.86
Qrob_T0316680.2	uncharacterized LOC115992561, transcript variant X2	0.86
Qrob_T0667590.2	glycosyltransferase family 92 protein RCOM_0530710	0.86
Qrob_T0042520.2		0.86
Qrob_T0395970.2	uncharacterized LOC115958454, transcript variant X3	0.86
Qrob_T0726500.2	F-box/WD-40 repeat-containing protein At3g52030-like	0.86
Qrob_T0206820.2	MADS-box protein AGL42-like	0.86
Qrob_T0470500.2	vacuolar protein sorting-associated protein 45 homolog	0.86
Qrob_T0134320.2		0.86
Qrob_T0465430.2	NASP-related protein sim3	0.85
Qrob_T0559160.2	uncharacterized protein C57A7.06	0.85
Qrob_T0714460.2	ACT domain-containing protein ACR9	0.85
Qrob_T0127020.2	protein NETWORKED 4A-like	0.85
Qrob_T0076450.2	defective in cullin neddylation protein 1, transcript variant X1	0.85
Qrob_T0030590.2		0.85
Qrob_T0344300.2	regulator of nonsense transcripts UPF3, transcript variant X2	0.85
Qrob_T0659160.2	probable L-gulonolactone oxidase 6	0.85
Qrob_T0173030.2	uncharacterized LOC115995020, transcript variant X2	0.85
Qrob_T0049020.2	serine/arginine-rich splicing factor SC35, transcript variant X2	0.85
Qrob_T0126260.2	CRAL-TRIO domain-containing protein C3H8.02	0.85
Qrob_T0129730.2		0.85
Qrob_T0677400.2	beta-amylase 7, transcript variant X2	0.85
Qrob_T0714870.2	aquaporin SIP1-1-like	0.84
Qrob_T0104140.2	uncharacterized LOC115982900	0.84
Qrob_T0648270.2	cytochrome P450 CYP82D47-like	0.84
Qrob_T0771790.2	uncharacterized LOC115971131	0.84
Qrob_T0087000.2	ERI1 exoribonuclease 2-like	0.84
Qrob_T0276370.2	pumilio homolog 6, chloroplastic-like, transcript variant X2	0.84
Qrob_T0512400.2	ribosome biogenesis protein BRX1 homolog 1-like	0.84
Qrob_T0454970.2	nucleolar complex protein 2 homolog, transcript variant X2	0.84
Qrob_T0457150.2	E3 ubiquitin-protein ligase SHPRH	0.84
Qrob_T0607350.2		0.84
Qrob_T0674960.2	histone-lysine N-methyltransferase ATX5, transcript variant X2	0.84
Qrob_T0042490.2	GTP 3',8-cyclase, mitochondrial	0.84
Qrob_T0137470.2	protein ABCI7, chloroplastic	0.84
Qrob_T0755950.2	uncharacterized LOC115954648	0.84
Qrob_T0345160.2	G-type lectin S-receptor-like serine/threonine-protein kinase SD1-1, transcript variant X1	0.84
Qrob_T0222140.2		0.84
Qrob_T0651780.2	alpha-ketoglutarate-dependent dioxygenase alkB, transcript variant X1	0.84
Qrob_T0254490.2	5-oxoprolinase, transcript variant X2	0.84
Qrob_T0128870.2	E3 ubiquitin-protein ligase At3g02290, transcript variant X3	0.84
Qrob_T0423770.2	uncharacterized LOC115977213	0.84
Qrob_T0732640.2	uncharacterized LOC115978807	0.84
Qrob_T0238310.2	serine/arginine-rich splicing factor SR45a	0.83
Qrob_T0094540.2	caffeic acid 3-O-methyltransferase 1-like	0.83
Qrob_T0071190.2	NADP-dependent glyceraldehyde-3-phosphate dehydrogenase	0.83
Qrob_T0689980.2	nucleolar GTP-binding protein 1-like, transcript variant X6	0.83
Qrob_T0563290.2	transcription factor HBP-1b(c38)-like, transcript variant X2	0.83
Qrob_T0522370.2	DEAD-box ATP-dependent RNA helicase 32	0.83
Qrob_T0489770.2	G-type lectin S-receptor-like serine/threonine-protein kinase At2g19130, transcript variant X1	0.83
Qrob_T0463120.2	uncharacterized LOC115982950	0.83
Qrob_T0606800.2	cytochrome P450 71A9-like	0.83
Qrob_T0317680.2	tobamovirus multiplication protein 1, transcript variant X1	0.83
Qrob_T0499130.2		0.83
Qrob_T0204830.2	uncharacterized LOC115974604	0.83
Qrob_T0152260.2	general transcription and DNA repair factor IIH subunit TFB4-like, transcript variant X3	0.83
Qrob_T0331130.2		0.83
Qrob_T0307390.2		0.83
Qrob_T0247330.2		0.83
Qrob_T0401850.2		0.83
Qrob_T0029980.2		0.83
Qrob_T0194890.2	cytochrome P450 81E8-like	0.83
Qrob_T0123730.2	probable splicing factor 3A subunit 1, transcript variant X3	0.82
Qrob_T0039710.2	coiled-coil domain-containing protein 130-like	0.82
Qrob_T0248270.2	scarecrow-like protein 33	0.82
Qrob_T0288870.2	scarecrow-like protein 21, transcript variant X4	0.82
Qrob_T0366580.2	endoribonuclease Dicer homolog 1-like	0.82
Qrob_T0131220.2	protein virilizer homolog, transcript variant X3	0.82
Qrob_T0067690.2	two-component response regulator ORR21-like	0.82
Qrob_T0171240.2	urea-proton symporter DUR3-like	0.82
Qrob_T0104430.2	pentatricopeptide repeat-containing protein At3g02490, mitochondrial-like	0.82
Qrob_T0560770.2	uncharacterized protein At3g06530	0.82
Qrob_T0279280.2	probable ATP-dependent DNA helicase CHR12, transcript variant X2	0.82
Qrob_T0010670.2	protein JINGUBANG-like	0.82
Qrob_T0108420.2	transcription factor MYB59	0.82
Qrob_T0248810.2	E3 ubiquitin protein ligase DRIP2-like, transcript variant X2	0.82
Qrob_T0069150.2	L-type lectin-domain containing receptor kinase VII.1-like	0.82
Qrob_T0037140.2	FHA domain-containing protein FHA2, transcript variant X2	0.82
Qrob_T0650910.2	surfeit locus protein 2	0.82
Qrob_T0045220.2	uncharacterized LOC115973788, transcript variant X2	0.82
Qrob_T0343700.2	uncharacterized LOC115982138, transcript variant X1	0.82
Qrob_T0522710.2	UPF0496 protein At3g19330-like, transcript variant X4	0.82
Qrob_T0541750.2	geraniol 8-hydroxylase-like	0.82
Qrob_T0543030.2	protein FAR1-RELATED SEQUENCE 5-like	0.82
Qrob_T0653140.2		0.82
Qrob_T0556900.2	protein DETOXIFICATION 16-like	0.81
Qrob_T0248230.2	oxysterol-binding protein-related protein 3C	0.81
Qrob_T0572170.2	MLO-like protein 6	0.81
Qrob_T0345540.2	uncharacterized LOC115971510	0.81
Qrob_T0191700.2	uncharacterized LOC115960256	0.81
Qrob_T0500140.2	uncharacterized LOC115982017	0.81
Qrob_T0071180.2	transcription factor bHLH66	0.81
Qrob_T0338570.2	pathogen-related protein-like	0.81
Qrob_T0737540.2	splicing factor U2AF-associated protein 2, transcript variant X2	0.81
Qrob_T0246310.2		0.81
Qrob_T0633100.2	50S ribosomal protein HLP, mitochondrial-like, transcript variant X3	0.81
Qrob_T0278580.2	FGGY carbohydrate kinase domain-containing protein, transcript variant X2	0.81
Qrob_T0373730.2	translation initiation factor IF3-1, mitochondrial	0.81
Qrob_T0199740.2		0.81
Qrob_T0011730.2	E3 ubiquitin-protein ligase CHFR	0.81
Qrob_T0034900.2	neuroguidin-like	0.81
Qrob_T0248910.2	probable WRKY transcription factor 74	0.81
Qrob_T0380440.2	uncharacterized LOC115979942, transcript variant X6	0.81
Qrob_T0343070.2	uncharacterized LOC115962725, transcript variant X3	0.81
Qrob_T0720270.2	uncharacterized protein At5g41620-like	0.81
Qrob_T0494290.2		0.81
Qrob_T0577220.2	5'-nucleotidase domain-containing protein DDB_G0275467	0.81
Qrob_T0283290.2	receptor-like protein EIX2	0.81
Qrob_T0600200.2	probable LRR receptor-like serine/threonine-protein kinase At1g56140	0.81
Qrob_T0711810.2	nucleolar protein 58, transcript variant X1	0.81
Qrob_T0593350.2	structural maintenance of chromosomes flexible hinge domain-containing protein GMI1	0.81
Qrob_T0235400.2	uncharacterized LOC115976456	0.81
Qrob_T0610920.2	ubiquitin-conjugating enzyme E2 10	0.8
Qrob_T0542120.2	monoacylglycerol lipase	0.8
Qrob_T0427240.2	UBP1-associated protein 2C, transcript variant X3	0.8
Qrob_T0037160.2	cyclin-T1-5, transcript variant X1	0.8
Qrob_T0179090.2	long chain acyl-CoA synthetase 7, peroxisomal	0.8
Qrob_T0158400.2	eukaryotic translation initiation factor 4B3	0.8
Qrob_T0674890.2	phosphatidylinositol 4-kinase gamma 3	0.8
Qrob_T0447520.2	GATA transcription factor 24-like, transcript variant X3	0.8
Qrob_T0532910.2	probable 1-acyl-sn-glycerol-3-phosphate acyltransferase 4, transcript variant X1	0.8
Qrob_T0517710.2	glutamate-rich WD repeat-containing protein 1	0.8
Qrob_T0070970.2		0.8
Qrob_T0515420.2		0.8
Qrob_T0041920.2	adenylate kinase isoenzyme 6 homolog	0.8
Qrob_T0369730.2	GTP-binding nuclear protein Ran1A-like, transcript variant X4	0.8
Qrob_T0286990.2	auxin-responsive protein SAUR72-like	0.8
Qrob_T0426590.2	uncharacterized LOC115987268	0.8
Qrob_T0241090.2	choline-phosphate cytidylyltransferase 1-like	0.8
Qrob_T0293000.2		0.8
Qrob_T0759650.2		0.8
Qrob_T0664380.2	uncharacterized LOC115972227	0.8
Qrob_T0577590.2	plant UBX domain-containing protein 11	0.8
Qrob_T0168510.2	disease resistance protein RLM3-like	0.8
Qrob_T0529510.2	putative methyltransferase DDB_G0268948	0.8
Qrob_T0627320.2	uncharacterized LOC115959170	0.8
Qrob_T0404210.2	polyadenylate-binding protein-interacting protein 12-like, transcript variant X3	0.79
Qrob_T0343760.2	uncharacterized LOC115982147	0.79
Qrob_T0752080.2		0.79
Qrob_T0511130.2	uncharacterized LOC115952752	0.79
Qrob_T0632360.2	DEAD-box ATP-dependent RNA helicase 42, transcript variant X4	0.79
Qrob_T0487340.2		0.79
Qrob_T0152220.2	DDB1- and CUL4-associated factor homolog 1	0.79
Qrob_T0446930.2		0.79
Qrob_T0448820.2	B3 domain-containing transcription repressor VAL2, transcript variant X2	0.79
Qrob_T0126910.2	probable LRR receptor-like serine/threonine-protein kinase At1g06840, transcript variant X5	0.79
Qrob_T0340870.2	dof zinc finger protein DOF1.4-like, transcript variant X2	0.79
Qrob_T0587540.2	zinc finger CCCH domain-containing protein 1-like	0.79
Qrob_T0461530.2	pathogenesis-related homeodomain protein	0.79
Qrob_T0765160.2	transcription termination factor MTERF2, chloroplastic	0.79
Qrob_T0570530.2	pyridine nucleotide-disulfide oxidoreductase domain-containing protein 2-like	0.79
Qrob_T0088400.2	uncharacterized LOC115953201	0.79
Qrob_T0268180.2	uncharacterized LOC115983552	0.79
Qrob_T0723320.2	protein DOS2-like	0.79
Qrob_T0247230.2	UDP-glycosyltransferase 87A1-like	0.79
Qrob_T0430990.2	uncharacterized LOC115963566, transcript variant X2	0.79
Qrob_T0747610.2		0.79
Qrob_T0699260.2		0.79
Qrob_T0517090.2		0.79
Qrob_T0032120.2	la-related protein 6B	0.78
Qrob_T0246350.2	F-box/kelch-repeat protein SKIP11-like, transcript variant X1	0.78
Qrob_T0216660.2	DEAD-box ATP-dependent RNA helicase 46, transcript variant X2	0.78
Qrob_T0608200.2	zinc finger CCCH domain-containing protein 49-like	0.78
Qrob_T0501510.2	ABC transporter C family member 5	0.78
Qrob_T0090660.2	1-aminocyclopropane-1-carboxylate oxidase homolog 4-like	0.78
Qrob_T0027750.2	cysteine proteinase inhibitor B	0.78
Qrob_T0126290.2	uncharacterized LOC115964002, transcript variant X2	0.78
Qrob_T0530990.2	polyadenylation and cleavage factor homolog 4-like	0.78
Qrob_T0482750.2	uncharacterized LOC115979896	0.78
Qrob_T0656350.2	E3 ubiquitin-protein ligase RZFP34-like, transcript variant X2	0.78
Qrob_T0141490.2	dynamin-related protein 1E	0.78
Qrob_T0398490.2	cytochrome P450 81Q32-like	0.78
Qrob_T0112580.2	heat shock factor protein HSF8	0.78
Qrob_T0655560.2	pyrrolidone-carboxylate peptidase	0.78
Qrob_T0403640.2	uncharacterized LOC115965338	0.78
Qrob_T0044970.2	REF/SRPP-like protein At3g05500, transcript variant X2	0.78
Qrob_T0286980.2	nucleolar complex protein 3 homolog	0.78
Qrob_T0338700.2	protein MKS1	0.78
Qrob_T0577200.2	tetratricopeptide repeat protein 1, transcript variant X3	0.78
Qrob_T0219110.2		0.78
Qrob_T0260920.2	two-component response regulator-like APRR3	0.78
Qrob_T0224290.2	DEAD-box ATP-dependent RNA helicase 50-like, transcript variant X2	0.78
Qrob_T0018980.2	spermatogenesis-associated protein 20	0.78
Qrob_T0334180.2	uncharacterized LOC115974995, transcript variant X1	0.78
Qrob_T0309460.2	protein NRDE2 homolog, transcript variant X4	0.78
Qrob_T0057330.2	zinc finger MYND domain-containing protein 15, transcript variant X1	0.78
Qrob_T0747330.2	NKAP-like protein, transcript variant X6	0.78
Qrob_T0156400.2	zinc finger CCCH domain-containing protein 5, transcript variant X4	0.78
Qrob_T0196290.2		0.78
Qrob_T0423880.2	class V chitinase-like	0.78
Qrob_T0636480.2	probable eukaryotic translation initiation factor 5-1, transcript variant X2	0.77
Qrob_T0257360.2	uncharacterized LOC115955903, transcript variant X1	0.77
Qrob_T0094090.2	F-box protein At1g67340-like	0.77
Qrob_T0415920.2	F-box only protein 6	0.77
Qrob_T0660310.2	abscisic acid 8'-hydroxylase 2	0.77
Qrob_T0543120.2	F-box protein At5g49610-like	0.77
Qrob_T0615970.2		0.77
Qrob_T0453820.2	uncharacterized LOC115965853	0.77
Qrob_T0745130.2	uncharacterized LOC115994999, transcript variant X7	0.77
Qrob_T0379640.2	ribosomal RNA-processing protein 14-C, transcript variant X2	0.77
Qrob_T0371920.2	transcription repressor MYB5-like	0.77
Qrob_T0129740.2	autophagy-related protein 13b	0.77
Qrob_T0130870.2		0.77
Qrob_T0237030.2	protein DETOXIFICATION 29-like	0.77
Qrob_T0035590.2	serine/threonine receptor-like kinase NFP	0.77
Qrob_T0489940.2	protein EMBRYO SAC DEVELOPMENT ARREST 30, transcript variant X3	0.77
Qrob_T0317420.2	uncharacterized LOC115954451, transcript variant X4	0.77
Qrob_T0589570.2	uncharacterized LOC115976773	0.77
Qrob_T0315860.2	RNA-binding protein CP31B, chloroplastic	0.77
Qrob_T0153980.2	pectinesterase 2-like	0.77
Qrob_T0351450.2	7-deoxyloganetin glucosyltransferase-like	0.77
Qrob_T0261030.2	mediator of RNA polymerase II transcription subunit 4	0.77
Qrob_T0451590.2		0.77
Qrob_T0693330.2	uncharacterized LOC115971795	0.77
Qrob_T0227890.2	protein DMP3-like	0.77
Qrob_T0480660.2		0.77
Qrob_T0300240.2		0.77
Qrob_T0450430.2	ribosomal lysine N-methyltransferase 3	0.77
Qrob_T0433020.2		0.77
Qrob_T0189760.2	uncharacterized LOC115967935, transcript variant X6	0.77
Qrob_T0021000.2	DEAD-box ATP-dependent RNA helicase 14	0.76
Qrob_T0081720.2		0.76
Qrob_T0346100.2	apoptotic chromatin condensation inducer in the nucleus	0.76
Qrob_T0178680.2	protein PAF1 homolog	0.76
Qrob_T0307910.2	probable 3-hydroxyisobutyrate dehydrogenase-like 1, mitochondrial	0.76
Qrob_T0005890.2	protein EXECUTER 2, chloroplastic, transcript variant X1	0.76
Qrob_T0183070.2	protein BASIC PENTACYSTEINE6-like, transcript variant X4	0.76
Qrob_T0478240.2	protein SICKLE, transcript variant X3	0.76
Qrob_T0618890.2	periodic tryptophan protein 2	0.76
Qrob_T0096880.2	putative U-box domain-containing protein 50	0.76
Qrob_T0520530.2	ATP-dependent zinc metalloprotease FTSH 8, mitochondrial-like, transcript variant X1	0.76
Qrob_T0131620.2		0.76
Qrob_T0667560.2	pentatricopeptide repeat-containing protein At4g32450, mitochondrial-like, transcript variant X2	0.76
Qrob_T0041570.2	serine/arginine repetitive matrix protein 2, transcript variant X4	0.76
Qrob_T0096870.2	putative U-box domain-containing protein 50	0.76
Qrob_T0563390.2	G patch domain-containing protein TGH	0.76
Qrob_T0635090.2		0.76
Qrob_T0337870.2		0.76
Qrob_T0377200.2	uncharacterized LOC115975303, transcript variant X2	0.76
Qrob_T0601420.2		0.76
Qrob_T0616060.2	early nodulin-75-like	0.75
Qrob_T0104170.2	hypersensitive-induced response protein 1-like, transcript variant X6	0.75
Qrob_T0740750.2	pre-mRNA-splicing factor SLU7-A	0.75
Qrob_T0116200.2	protein DMR6-LIKE OXYGENASE 2-like	0.75
Qrob_T0026260.2	translocase of chloroplast 159, chloroplastic	0.75
Qrob_T0083750.2	protein DMR6-LIKE OXYGENASE 2-like	0.75
Qrob_T0569090.2	inosine-5'-monophosphate dehydrogenase 2-like	0.75
Qrob_T0114350.2	phospho-2-dehydro-3-deoxyheptonate aldolase 2, chloroplastic-like	0.75
Qrob_T0413010.2	uncharacterized LOC115956031, transcript variant X3	0.75
Qrob_T0710070.2	cleavage and polyadenylation specificity factor subunit 6, transcript variant X2	0.75
Qrob_T0628640.2	cell division cycle 5-like protein	0.75
Qrob_T0395680.2	mitochondrial-processing peptidase subunit alpha-like	0.75
Qrob_T0396650.2	AT-hook motif nuclear-localized protein 17-like	0.75
Qrob_T0725560.2	rab3 GTPase-activating protein non-catalytic subunit, transcript variant X1	0.75
Qrob_T0176450.2	beta-glucuronosyltransferase GlcAT14B-like, transcript variant X4	0.75
Qrob_T0442690.2	peptidyl-prolyl cis-trans isomerase CYP71, transcript variant X1	0.75
Qrob_T0200510.2	protein CPR-5	0.75
Qrob_T0387250.2	transcription factor bHLH130, transcript variant X2	0.75
Qrob_T0744160.2	copper-transporting ATPase HMA4-like	0.75
Qrob_T0478250.2	double-stranded RNA-binding protein 5-like	0.75
Qrob_T0309450.2	protein NRDE2 homolog, transcript variant X4	0.75
Qrob_T0566050.2	uncharacterized LOC115981505	0.75
Qrob_T0369570.2	actin-depolymerizing factor, transcript variant X2	0.75
Qrob_T0595480.2	J domain-containing protein spf31	0.75
Qrob_T0532650.2	myosin-binding protein 3	0.75
Qrob_T0147730.2	uncharacterized LOC115988078	0.75
Qrob_T0002750.2	uncharacterized LOC115978875	0.75
Qrob_T0222500.2		0.75
Qrob_T0087360.2	integrator complex subunit 3 homolog, transcript variant X9	0.75
Qrob_T0119790.2	zinc finger protein ZAT5-like	0.75
Qrob_T0287920.2	uncharacterized LOC115963375	0.75
Qrob_T0363750.2	queuine tRNA-ribosyltransferase accessory subunit 2-like	0.75
Qrob_T0147660.2	DENN domain and WD repeat-containing protein SCD1-like, transcript variant X3	0.75
Qrob_T0330190.2	carboxyl-terminal-processing peptidase 1, chloroplastic	0.75
Qrob_T0598060.2	nuclear-pore anchor, transcript variant X1	0.74
Qrob_T0739240.2		0.74
Qrob_T0268720.2	UBP1-associated protein 2A-like	0.74
Qrob_T0016050.2	60S ribosomal protein L7-1-like	0.74
Qrob_T0336150.2	6-phosphofructo-2-kinase/fructose-2,6-bisphosphatase, transcript variant X1	0.74
Qrob_T0248980.2	oxygen-evolving enhancer protein 2, chloroplastic	0.74
Qrob_T0004080.2	DEAD-box ATP-dependent RNA helicase 18	0.74
Qrob_T0084220.2	homeobox-leucine zipper protein ATHB-7-like, transcript variant X1	0.74
Qrob_T0356180.2	mediator of RNA polymerase II transcription subunit 13, transcript variant X1	0.74
Qrob_T0381350.2		0.74
Qrob_T0086780.2	E3 ubiquitin-protein ligase SINA-like 10	0.74
Qrob_T0340060.2	protein EI24 homolog, transcript variant X1	0.74
Qrob_T0635440.2	DNA-directed RNA polymerase V subunit 7-like, transcript variant X2	0.74
Qrob_T0221660.2		0.74
Qrob_T0338820.2	uncharacterized LOC115975054, transcript variant X1	0.74
Qrob_T0292990.2		0.74
Qrob_T0347420.2	UDP-glycosyltransferase 74F2-like	0.74
Qrob_T0443210.2	reticulon-like protein B22	0.74
Qrob_T0201910.2	probable galactinol--sucrose galactosyltransferase 1	0.74
Qrob_T0642540.2	molybdopterin synthase sulfur carrier subunit	0.74
Qrob_T0116170.2	protein DMR6-LIKE OXYGENASE 2-like	0.74
Qrob_T0550910.2	uncharacterized LOC115972410, transcript variant X2	0.74
Qrob_T0346120.2	regulation of nuclear pre-mRNA domain-containing protein 1B	0.74
Qrob_T0089760.2	nuclear pore complex protein NUP50A-like, transcript variant X3	0.73
Qrob_T0313890.2	uncharacterized LOC115993930, transcript variant X4	0.73
Qrob_T0619610.2	5'-3' exoribonuclease 3, transcript variant X2	0.73
Qrob_T0367630.2	calcium homeostasis endoplasmic reticulum protein, transcript variant X3	0.73
Qrob_T0361570.2	protein PHR1-LIKE 1-like, transcript variant X1	0.73
Qrob_T0033990.2	mediator of RNA polymerase II transcription subunit 12, transcript variant X3	0.73
Qrob_T0032370.2	ankyrin repeat protein SKIP35-like, transcript variant X3	0.73
Qrob_T0541330.2	primary amine oxidase-like	0.73
Qrob_T0240410.2	chaperone protein dnaJ 50-like	0.73
Qrob_T0136300.2	uncharacterized LOC115960314, transcript variant X4	0.73
Qrob_T0013730.2	zinc finger protein GAI-ASSOCIATED FACTOR 1-like	0.73
Qrob_T0218860.2	protein PLANT CADMIUM RESISTANCE 10	0.73
Qrob_T0126310.2	glutaredoxin	0.73
Qrob_T0713160.2	WD repeat-containing protein 43, transcript variant X5	0.73
Qrob_T0286340.2	cyclin-dependent kinase D-3-like	0.73
Qrob_T0460230.2	ATPase family AAA domain-containing protein 1, transcript variant X1	0.73
Qrob_T0270980.2	monodehydroascorbate reductase 4, peroxisomal	0.73
Qrob_T0128380.2	uncharacterized LOC115959702, transcript variant X3	0.73
Qrob_T0352970.2	RNA-binding protein 25, transcript variant X1	0.73
Qrob_T0030680.2	uncharacterized LOC115981662	0.73
Qrob_T0160470.2	E3 ubiquitin-protein ligase ATL41-like	0.73
Qrob_T0497750.2	vestitone reductase-like	0.73
Qrob_T0481050.2		0.73
Qrob_T0750550.2	glutaredoxin-C9	0.73
Qrob_T0310250.2	GDSL esterase/lipase 1-like	0.73
Qrob_T0083350.2	protein DAMAGED DNA-BINDING 2	0.73
Qrob_T0533440.2		0.72
Qrob_T0530450.2		0.72
Qrob_T0248260.2	telomere repeat-binding protein 5-like, transcript variant X1	0.72
Qrob_T0690970.2	GEM-like protein 5	0.72
Qrob_T0563270.2		0.72
Qrob_T0085710.2	protein indeterminate-domain 7	0.72
Qrob_T0514250.2	transcription factor GTE12	0.72
Qrob_T0533430.2	B-box zinc finger protein 19-like	0.72
Qrob_T0539170.2	receptor-like protein kinase HERK 1	0.72
Qrob_T0191320.2	histone-lysine N-methyltransferase ASHH2, transcript variant X1	0.72
Qrob_T0236150.2		0.72
Qrob_T0570920.2	uncharacterized LOC115978880	0.72
Qrob_T0087770.2	DNA repair endonuclease UVH1	0.72
Qrob_T0045240.2	28 kDa ribonucleoprotein, chloroplastic	0.72
Qrob_T0313140.2	calcium-dependent protein kinase 26-like	0.72
Qrob_T0101980.2		0.72
Qrob_T0103390.2	metal tolerance protein 9-like	0.72
Qrob_T0112410.2		0.72
Qrob_T0077890.2	E3 ubiquitin-protein ligase RFWD3-like	0.72
Qrob_T0430600.2	abscisate beta-glucosyltransferase-like	0.72
Qrob_T0171520.2	U-box domain-containing protein 26-like	0.72
Qrob_T0136280.2	thioredoxin-like fold domain-containing protein MRL7, chloroplastic, transcript variant X6	0.72
Qrob_T0643640.2	dirigent protein 17-like	0.72
Qrob_T0420870.2		0.72
Qrob_T0152970.2	short-chain dehydrogenase TIC 32, chloroplastic-like, transcript variant X2	0.72
Qrob_T0512070.2	uncharacterized LOC115971545, transcript variant X1	0.72
Qrob_T0015760.2	probable aldo-keto reductase 1	0.71
Qrob_T0430540.2	probable E3 ubiquitin ligase SUD1, transcript variant X2	0.71
Qrob_T0159300.2	crocetin glucosyltransferase, chloroplastic-like	0.71
Qrob_T0343920.2	mitochondrial import inner membrane translocase subunit TIM17-2-like	0.71
Qrob_T0288850.2	probable WRKY transcription factor 20, transcript variant X1	0.71
Qrob_T0112630.2	guanine nucleotide-binding protein-like NSN1	0.71
Qrob_T0640930.2	uncharacterized LOC115953027, transcript variant X1	0.71
Qrob_T0467370.2	uncharacterized LOC115955983	0.71
Qrob_T0125650.2	RNA-binding protein 28, transcript variant X1	0.71
Qrob_T0268870.2	UBP1-associated protein 2B-like	0.71
Qrob_T0226500.2	deoxyhypusine synthase	0.71
Qrob_T0171280.2	protein MOS2-like, transcript variant X7	0.71
Qrob_T0418840.2	transcription factor RAX3-like, transcript variant X2	0.71
Qrob_T0723530.2	mpv17-like protein	0.71
Qrob_T0464970.2	anthocyanidin 3-O-glucosyltransferase 5-like	0.71
Qrob_T0544730.2	uncharacterized LOC115988025, transcript variant X4	0.71
Qrob_T0378100.2		0.71
Qrob_T0219100.2	DExH-box ATP-dependent RNA helicase DExH9	0.71
Qrob_T0705590.2	protein LTO1 homolog	0.71
Qrob_T0226710.2		0.71
Qrob_T0206700.2	uncharacterized LOC115960269	0.71
Qrob_T0398410.2	cytochrome P450 81C13-like	0.71
Qrob_T0666640.2	uncharacterized LOC115977735	0.71
Qrob_T0732260.2	zinc finger CCCH domain-containing protein 39	0.71
Qrob_T0760130.2	protein HIRA, transcript variant X2	0.71
Qrob_T0578460.2	flavin-containing monooxygenase FMO GS-OX-like 2	0.71
Qrob_T0356770.2	uncharacterized LOC115977178	0.71
Qrob_T0090670.2	1-aminocyclopropane-1-carboxylate oxidase homolog 1-like	0.71
Qrob_T0591670.2	DNA polymerase zeta catalytic subunit-like	0.71
Qrob_T0728420.2	uncharacterized LOC115968250	0.71
Qrob_T0048680.2	peroxidase N1-like	0.71
Qrob_T0436010.2	uncharacterized LOC115957257, transcript variant X1	0.71
Qrob_T0616580.2	auxin-repressed 12.5 kDa protein-like	0.7
Qrob_T0038800.2	zinc finger A20 and AN1 domain-containing stress-associated protein 8-like	0.7
Qrob_T0228190.2		0.7
Qrob_T0766790.2	arginine/serine-rich coiled-coil protein 2, transcript variant X2	0.7
Qrob_T0697610.2	probable ribose-5-phosphate isomerase 2	0.7
Qrob_T0436940.2	uncharacterized LOC115968706, transcript variant X2	0.7
Qrob_T0134150.2	A-agglutinin anchorage subunit	0.7
Qrob_T0714540.2	elongator complex protein 1, transcript variant X2	0.7
Qrob_T0265630.2	EEF1A lysine methyltransferase 1	0.7
Qrob_T0521940.2	probable metal-nicotianamine transporter YSL7	0.7
Qrob_T0564060.2	uncharacterized LOC115974218, transcript variant X1	0.7
Qrob_T0238650.2	protein STRICTOSIDINE SYNTHASE-LIKE 5-like	0.7
Qrob_T0343720.2	squamosa promoter-binding-like protein 16, transcript variant X1	0.7
Qrob_T0247570.2		0.7
Qrob_T0461340.2	protein SPA1-RELATED 2, transcript variant X2	0.7
Qrob_T0438090.2	uncharacterized LOC115974944, transcript variant X1	0.7
Qrob_T0358710.2		0.7
Qrob_T0219690.2	probable WRKY transcription factor 3	0.7
Qrob_T0426680.2	heat shock cognate 70 kDa protein 2-like, transcript variant X2	0.7
Qrob_T0683720.2	pentatricopeptide repeat-containing protein At1g11710, mitochondrial, transcript variant X1	0.7
Qrob_T0049080.2	copper-transporting ATPase PAA1, chloroplastic, transcript variant X1	0.7
Qrob_T0584120.2	protein PLASTID TRANSCRIPTIONALLY ACTIVE 16, chloroplastic	0.7
Qrob_T0432870.2	J domain-containing protein required for chloroplast accumulation response 1-like, transcript variant X1	0.7
Qrob_T0400790.2	protein FAR1-RELATED SEQUENCE 6-like	0.7
Qrob_T0432650.2	disease resistance protein RGA2-like, transcript variant X3	0.7
Qrob_T0715180.2	O-fucosyltransferase 13, transcript variant X4	0.7
Qrob_T0661950.2	protein GrpE, transcript variant X1	0.7
Qrob_T0076420.2	pentatricopeptide repeat-containing protein At5g50390, chloroplastic-like	0.7
Qrob_T0533480.2	zinc finger CCCH domain-containing protein 44	0.69
Qrob_T0094700.2		0.69
Qrob_T0202370.2	uncharacterized LOC115978982, transcript variant X2	0.69
Qrob_T0536550.2	uncharacterized LOC115965965	0.69
Qrob_T0111520.2	YTH domain-containing protein ECT2-like, transcript variant X1	0.69
Qrob_T0307580.2	probable NAD(P)H dehydrogenase (quinone) FQR1-like 3	0.69
Qrob_T0402830.2	uncharacterized LOC115955593	0.69
Qrob_T0336970.2	uncharacterized LOC115952425	0.69
Qrob_T0425330.2	serine/threonine-protein kinase TOR, transcript variant X1	0.69
Qrob_T0483760.2	mediator-associated protein 2	0.69
Qrob_T0152910.2	silicon efflux transporter LSI2-like, transcript variant X3	0.69
Qrob_T0168050.2		0.69
Qrob_T0578790.2	uncharacterized LOC115991516, transcript variant X1	0.69
Qrob_T0074360.2	11S globulin seed storage protein 2-like	0.69
Qrob_T0268980.2	probable serine/threonine-protein kinase PBL18	0.69
Qrob_T0752030.2	cysteine-rich repeat secretory protein 38-like	0.69
Qrob_T0008350.2		0.69
Qrob_T0145640.2		0.69
Qrob_T0611060.2	dihydrofolate synthetase	0.69
Qrob_T0412540.2	DNA-directed RNA polymerase I subunit 1	0.69
Qrob_T0041520.2	DEAD-box ATP-dependent RNA helicase 42	0.69
Qrob_T0636360.2	uncharacterized protein At4g37920	0.69
Qrob_T0065870.2	transcription elongation regulator 1-like	0.69
Qrob_T0431370.2	probable magnesium transporter NIPA6	0.69
Qrob_T0607520.2		0.69
Qrob_T0497650.2	tRNA 2'-phosphotransferase 1	0.69
Qrob_T0070450.2	protein NUCLEAR FUSION DEFECTIVE 4-like, transcript variant X4	0.69
Qrob_T0231280.2	sister chromatid cohesion protein SCC2	0.69
Qrob_T0066940.2	protein PLANT CADMIUM RESISTANCE 2-like	0.69
Qrob_T0220800.2		0.69
Qrob_T0524250.2	2-alkenal reductase (NADP(+)-dependent)-like	0.69
Qrob_T0695590.2	pentatricopeptide repeat-containing protein At5g11310, mitochondrial-like	0.69
Qrob_T0173260.2	uncharacterized LOC115974026	0.68
Qrob_T0655920.2	DEAD-box ATP-dependent RNA helicase 7	0.68
Qrob_T0426290.2	dnaJ protein homolog, transcript variant X2	0.68
Qrob_T0417890.2	ABC transporter D family member 1, transcript variant X4	0.68
Qrob_T0463780.2	actin-depolymerizing factor 5-like	0.68
Qrob_T0612210.2	branched-chain amino acid aminotransferase 2, chloroplastic	0.68
Qrob_T0582270.2	ATP phosphoribosyltransferase 2, chloroplastic-like	0.68
Qrob_T0740470.2		0.68
Qrob_T0533330.2	RNA-binding protein FUS, transcript variant X4	0.68
Qrob_T0724760.2	GTPase LSG1-1-like	0.68
Qrob_T0239110.2	amino acid transporter AVT3C-like	0.68
Qrob_T0348690.2	RNA-binding protein pno1	0.68
Qrob_T0753780.2	heterogeneous nuclear ribonucleoprotein Q, transcript variant X4	0.68
Qrob_T0423350.2	aldehyde dehydrogenase family 2 member C4	0.68
Qrob_T0542760.2	protein REVEILLE 6, transcript variant X1	0.68
Qrob_T0418030.2	ras-related protein RABH1e	0.68
Qrob_T0096960.2	uncharacterized LOC115995093	0.68
Qrob_T0135790.2	homeobox-leucine zipper protein ROC2-like, transcript variant X1	0.68
Qrob_T0442660.2	alkaline/neutral invertase E, chloroplastic-like	0.68
Qrob_T0118230.2	F-box protein At5g51370-like	0.68
Qrob_T0064650.2	uncharacterized LOC115991661	0.68
Qrob_T0387070.2	myb-related protein 308	0.68
Qrob_T0511450.2	uncharacterized LOC115986379, transcript variant X2	0.68
Qrob_T0609980.2	transcription factor GTE8-like	0.68
Qrob_T0112600.2	TELO2-interacting protein 1 homolog, transcript variant X3	0.68
Qrob_T0283970.2	uncharacterized LOC115970926	0.68
Qrob_T0595840.2	acetylornithine aminotransferase, mitochondrial	0.68
Qrob_T0104400.2	phosphatase IMPL1, chloroplastic, transcript variant X5	0.68
Qrob_T0506540.2	uncharacterized LOC115979899, transcript variant X2	0.68
Qrob_T0089580.2	protein SYS1 homolog	0.68
Qrob_T0415450.2	cytochrome P450 704C1-like	0.68
Qrob_T0761150.2	transcription initiation factor TFIID subunit 2, transcript variant X1	0.68
Qrob_T0055950.2	uncharacterized LOC115967846, transcript variant X2	0.68
Qrob_T0418800.2		0.68
Qrob_T0625720.2	CLAVATA3/ESR (CLE)-related protein 12-like	0.68
Qrob_T0380990.2	uncharacterized LOC115983362	0.68
Qrob_T0500980.2	uncharacterized LOC115987972	0.68
Qrob_T0474840.2	chitin elicitor receptor kinase 1-like, transcript variant X2	0.68
Qrob_T0208240.2		0.67
Qrob_T0495500.2	polyadenylate-binding protein RBP45B-like, transcript variant X1	0.67
Qrob_T0462350.2	protein NETWORKED 1D, transcript variant X2	0.67
Qrob_T0111270.2	apoptosis-inducing factor homolog B	0.67
Qrob_T0082370.2	DUF724 domain-containing protein 6-like, transcript variant X2	0.67
Qrob_T0659150.2	probable L-gulonolactone oxidase 6	0.67
Qrob_T0653300.2	protein phosphatase 1 regulatory inhibitor subunit PPP1R7 homolog, transcript variant X2	0.67
[truncated: 1,263 more rows]

## Sheet: TR-DS_down-regulated
Gene	Annotation	log2_FC
Qrob_T0304250.2	cucumisin-like, transcript variant X2	-10.98
Qrob_T0422490.2	laccase-14-like	-9.02
Qrob_T0111030.2	serine carboxypeptidase-like 51, transcript variant X1	-8.28
Qrob_T0743810.2	probable xyloglucan glycosyltransferase 5	-7.78
Qrob_T0648200.2	kinesin-like protein KIN-12E	-7.1
Qrob_T0296360.2	peroxidase 72-like	-7.05
Qrob_T0460350.2	protein STRUBBELIG-RECEPTOR FAMILY 8, transcript variant X2	-6.88
Qrob_T0484760.2	auxin-induced protein 22D-like	-6.64
Qrob_T0559130.2	blue-light photoreceptor PHR2, transcript variant X2	-6.6
Qrob_T0297590.2	brassinosteroid-related acyltransferase 1	-6.5
Qrob_T0273200.2	alpha-amylase-like	-6.5
Qrob_T0040820.2	endochitinase EP3-like	-6.4
Qrob_T0600580.2	DNA-directed RNA polymerases IV and V subunit 4-like, transcript variant X3	-6.4
Qrob_T0224560.2	uncharacterized LOC115959369	-6.32
Qrob_T0587360.2	protein kinase PINOID 2	-6.27
Qrob_T0206100.2	L-ascorbate oxidase homolog	-6.24
Qrob_T0599000.2	ornithine carbamoyltransferase, chloroplastic	-6.16
Qrob_T0695290.2	uncharacterized LOC115971391, transcript variant X2	-6.13
Qrob_T0188920.2	beta-galactosidase 10	-5.97
Qrob_T0535680.2	5'-nucleotidase SurE 1-like	-5.95
Qrob_T0517080.2	serine/threonine-protein kinase BRI1-like 2	-5.95
Qrob_T0520410.2	amino acid transporter AVT1D-like	-5.85
Qrob_T0190290.2		-5.82
Qrob_T0224570.2	AUGMIN subunit 3, transcript variant X2	-5.68
Qrob_T0737340.2	acyltransferase-like protein At1g54570, chloroplastic, transcript variant X2	-5.63
Qrob_T0273270.2	protein CYPRO4	-5.6
Qrob_T0429790.2	T-complex protein 1 subunit alpha	-5.58
Qrob_T0063950.2	carotenoid cleavage dioxygenase 7, chloroplastic	-5.56
Qrob_T0433700.2	CASP-like protein 1F1	-5.54
Qrob_T0275660.2	acyl carrier protein 1, chloroplastic-like	-5.51
Qrob_T0041330.2	universal stress protein A-like protein	-5.49
Qrob_T0108450.2	uncharacterized LOC115950265	-5.49
Qrob_T0071290.2	uncharacterized LOC115977224, transcript variant X1	-5.46
Qrob_T0577420.2	uncharacterized LOC115962589	-5.45
Qrob_T0706040.2	3-hydroxyacyl-[acyl-carrier-protein] dehydratase FabZ-like	-5.42
Qrob_T0516030.2	uncharacterized LOC115957274, transcript variant X2	-5.42
Qrob_T0156050.2	uncharacterized LOC115987578	-5.41
Qrob_T0296190.2	thioredoxin domain-containing protein PLP3B-like	-5.37
Qrob_T0564280.2	urease accessory protein G	-5.32
Qrob_T0214170.2	lysosomal Pro-X carboxypeptidase-like	-5.29
Qrob_T0135740.2	uncharacterized LOC115960421	-5.28
Qrob_T0726590.2	glutamine synthetase cytosolic isozyme 2	-5.26
Qrob_T0147070.2	uncharacterized LOC115957785	-5.22
Qrob_T0721850.2	uncharacterized LOC115977820	-5.22
Qrob_T0713620.2	probable leucine-rich repeat receptor-like protein kinase At1g35710	-5.21
Qrob_T0729010.2	aspartokinase 3, chloroplastic-like, transcript variant X1	-5.2
Qrob_T0278330.2	4-coumarate--CoA ligase 1-like	-5.13
Qrob_T0503530.2	DENN domain and WD repeat-containing protein SCD1-like, transcript variant X2	-5.12
Qrob_T0278370.2		-5.12
Qrob_T0011530.2		-5.11
Qrob_T0050990.2	probable sucrose-phosphate synthase 4	-5.11
Qrob_T0553880.2	protein EARLY RESPONSIVE TO DEHYDRATION 15-like	-5.09
Qrob_T0087330.2	probable choline kinase 2	-5.08
Qrob_T0531940.2	probable prolyl 4-hydroxylase 9	-5.08
Qrob_T0166840.2	PLASMODESMATA CALLOSE-BINDING PROTEIN 3	-5.07
Qrob_T0059940.2	uncharacterized protein At4g06744-like	-5.07
Qrob_T0531960.2	leucine-rich repeat protein 2-like	-5.07
Qrob_T0119150.2	probable histone H2A.1	-5.07
Qrob_T0119780.2	aquaporin TIP1-1	-5.05
Qrob_T0555070.2	peptidyl-prolyl cis-trans isomerase CYP20-1	-5.05
Qrob_T0346310.2	thiosulfate sulfurtransferase 18, transcript variant X1	-5.04
Qrob_T0552170.2	proline-rich receptor-like protein kinase PERK1, transcript variant X1	-5.04
Qrob_T0345430.2		-5.03
Qrob_T0542690.2	DNA-directed RNA polymerase V subunit 7-like, transcript variant X3	-5.03
Qrob_T0020340.2	probable pectin methyltransferase QUA2	-5.01
Qrob_T0507590.2	uncharacterized LOC115991851, transcript variant X1	-5
Qrob_T0388780.2	uncharacterized LOC115958975	-4.97
Qrob_T0555350.2	uncharacterized LOC115963660	-4.96
Qrob_T0128750.2	subtilisin-like protease SBT3	-4.95
Qrob_T0481520.2	rhamnogalacturonan I rhamnosyltransferase 1-like, transcript variant X3	-4.95
Qrob_T0751270.2	protein SIEVE ELEMENT OCCLUSION B-like	-4.92
Qrob_T0262920.2		-4.91
Qrob_T0444940.2		-4.91
Qrob_T0622220.2	geranylgeranyl transferase type-2 subunit beta 1-like, transcript variant X3	-4.9
Qrob_T0367590.2	serine/arginine-rich splicing factor RSZ22A, transcript variant X1	-4.9
Qrob_T0087780.2	uncharacterized LOC115972325	-4.89
Qrob_T0652620.2	GABA transporter 1-like	-4.86
Qrob_T0314630.2	glucan endo-1,3-beta-glucosidase 6-like	-4.86
Qrob_T0063960.2	probable helicase CHR10, transcript variant X1	-4.84
Qrob_T0383280.2	ammonium transporter 3 member 3-like	-4.83
Qrob_T0032360.2		-4.82
Qrob_T0468060.2	transcription factor MYB73-like	-4.81
Qrob_T0527470.2	leucine-rich repeat-containing G-protein coupled receptor 4-like, transcript variant X1	-4.8
Qrob_T0469460.2	NADP-specific glutamate dehydrogenase, transcript variant X4	-4.76
Qrob_T0602160.2	protein disulfide isomerase-like 1-4	-4.75
Qrob_T0182330.2		-4.74
Qrob_T0396530.2	nudix hydrolase 17, mitochondrial-like	-4.71
Qrob_T0309410.2		-4.71
Qrob_T0230560.2		-4.7
Qrob_T0082050.2		-4.69
Qrob_T0624750.2	GATA transcription factor 28-like	-4.69
Qrob_T0459130.2	dihydroneopterin aldolase 2-like	-4.69
Qrob_T0658550.2	dolichyl-diphosphooligosaccharide--protein glycosyltransferase subunit 2	-4.69
Qrob_T0270970.2	50S ribosomal protein L12, chloroplastic	-4.68
Qrob_T0498590.2		-4.67
Qrob_T0606760.2		-4.65
Qrob_T0447940.2	zinc transporter 11	-4.65
Qrob_T0252450.2	probable amino acid permease 7, transcript variant X6	-4.65
Qrob_T0590910.2	protein IQ-DOMAIN 14	-4.64
Qrob_T0251520.2		-4.63
Qrob_T0455530.2	ras-related protein Rab11C	-4.63
Qrob_T0732270.2	nudix hydrolase 19, chloroplastic	-4.62
Qrob_T0004120.2	protein trichome birefringence-like 33, transcript variant X1	-4.62
Qrob_T0415510.2	BEACH domain-containing protein C2, transcript variant X1	-4.62
Qrob_T0635410.2	protein SIEVE ELEMENT OCCLUSION B-like	-4.62
Qrob_T0183230.2	FCS-Like Zinc finger 5-like	-4.6
Qrob_T0070620.2		-4.59
Qrob_T0328730.2	translin	-4.59
Qrob_T0590390.2	delta-1-pyrroline-5-carboxylate synthase-like, transcript variant X1	-4.59
Qrob_T0765500.2		-4.58
Qrob_T0754610.2	early nodulin-93-like	-4.55
Qrob_T0462550.2	nuclear cap-binding protein subunit 2, transcript variant X2	-4.55
Qrob_T0169280.2	COP9 signalosome complex subunit 8-like	-4.55
Qrob_T0404170.2	probable ribosomal protein S11, mitochondrial	-4.55
Qrob_T0645100.2	ras-related protein RABF2a	-4.54
Qrob_T0182390.2	nucleobase-ascorbate transporter 2	-4.54
Qrob_T0142700.2	probable calcium-binding protein CML47	-4.53
Qrob_T0370990.2	thioredoxin-like 1-1, chloroplastic	-4.53
Qrob_T0186470.2	caffeic acid 3-O-methyltransferase-like	-4.53
Qrob_T0142820.2	uncharacterized endoplasmic reticulum membrane protein C16E8.02	-4.52
Qrob_T0126680.2	wound-induced protein 1	-4.52
Qrob_T0186200.2	proteasome subunit beta type-3-A	-4.51
Qrob_T0496440.2	nudix hydrolase 13, mitochondrial-like, transcript variant X3	-4.51
Qrob_T0473620.2	50S ribosomal protein L24	-4.49
Qrob_T0153640.2	dihydrolipoyllysine-residue acetyltransferase component 1 of pyruvate dehydrogenase complex, mitochondrial, transcript variant X1	-4.49
Qrob_T0222400.2	putative phosphatidylglycerol/phosphatidylinositol transfer protein DDB_G0282179	-4.48
Qrob_T0589770.2	coatomer subunit gamma	-4.46
Qrob_T0458050.2	CSC1-like protein ERD4	-4.45
Qrob_T0283900.2	LRR receptor-like serine/threonine-protein kinase FEI 1	-4.45
Qrob_T0413170.2	uncharacterized LOC115972080	-4.44
Qrob_T0599060.2	glucose-1-phosphate adenylyltransferase large subunit, chloroplastic/amyloplastic-like	-4.44
Qrob_T0622830.2		-4.43
Qrob_T0189860.2	protein CTR9 homolog	-4.43
Qrob_T0600940.2	cationic peroxidase 1-like	-4.42
Qrob_T0153140.2	60S ribosomal protein L36-2-like, transcript variant X2	-4.42
Qrob_T0627340.2	poly [ADP-ribose] polymerase 1	-4.41
Qrob_T0329130.2	uncharacterized LOC115994318, transcript variant X1	-4.4
Qrob_T0216070.2	universal stress protein PHOS34-like	-4.39
Qrob_T0125470.2	phosphatidylinositol/phosphatidylcholine transfer protein SFH6-like, transcript variant X2	-4.37
Qrob_T0369720.2	GTP-binding nuclear protein Ran-3	-4.37
Qrob_T0522780.2		-4.35
Qrob_T0352670.2	protein disulfide isomerase-like 2-3	-4.35
Qrob_T0589480.2	ABC transporter B family member 15-like	-4.35
Qrob_T0346430.2	L-ascorbate peroxidase 3-like	-4.34
Qrob_T0678280.2	eukaryotic translation initiation factor	-4.34
Qrob_T0238260.2	phospholipase D delta, transcript variant X1	-4.34
Qrob_T0288650.2	succinate dehydrogenase [ubiquinone] flavoprotein subunit 1, mitochondrial	-4.33
Qrob_T0656130.2	protein usf	-4.32
Qrob_T0424860.2	RNA demethylase ALKBH10B-like	-4.31
Qrob_T0067150.2	uncharacterized LOC115979335	-4.31
Qrob_T0474550.2	peroxisomal membrane protein PMP22-like	-4.29
Qrob_T0170870.2	7-deoxyloganetin glucosyltransferase-like, transcript variant X2	-4.25
Qrob_T0038080.2	carotenoid 9,10(9',10')-cleavage dioxygenase 1-like	-4.24
Qrob_T0206180.2	rop guanine nucleotide exchange factor 1	-4.23
Qrob_T0631300.2	vesicle transport protein GOT1-like, transcript variant X5	-4.19
Qrob_T0505290.2	DELLA protein GAI-like	-4.17
Qrob_T0086130.2	pleckstrin homology domain-containing protein 1	-4.16
Qrob_T0435950.2	anaphase-promoting complex subunit 1, transcript variant X1	-4.15
Qrob_T0141510.2	NAD-dependent malic enzyme 62 kDa isoform, mitochondrial	-4.14
Qrob_T0020310.2	7-deoxyloganetin glucosyltransferase-like	-4.12
Qrob_T0735950.2	membrane-associated 30 kDa protein, chloroplastic	-4.08
Qrob_T0647380.2		-4.06
Qrob_T0136470.2		-4.03
Qrob_T0650890.2	GDSL esterase/lipase At5g14450-like	-4.02
Qrob_T0434280.2	DNA replication complex GINS protein PSF2, transcript variant X1	-4
Qrob_T0279740.2	callose synthase 3, transcript variant X3	-3.97
Qrob_T0459640.2	uncharacterized LOC115975853, transcript variant X2	-3.93
Qrob_T0679320.2	xyloglucan endotransglucosylase/hydrolase 2-like	-3.92
Qrob_T0475660.2	protein DMR6-LIKE OXYGENASE 2-like	-3.91
Qrob_T0200810.2	calcium-dependent protein kinase 28-like	-3.91
Qrob_T0532940.2	leishmanolysin	-3.91
Qrob_T0357380.2	NADP-dependent malic enzyme, transcript variant X2	-3.91
Qrob_T0527880.2	fructose-bisphosphate aldolase 6, cytosolic	-3.9
Qrob_T0636380.2	transcription factor TGA7, transcript variant X2	-3.9
Qrob_T0567930.2	187-kDa microtubule-associated protein AIR9, transcript variant X2	-3.89
Qrob_T0486390.2	PHD finger protein At1g33420	-3.88
Qrob_T0339370.2	serine carboxypeptidase-like 7	-3.87
Qrob_T0287570.2	galactinol synthase 2-like	-3.87
Qrob_T0568740.2	endo-1,3;1,4-beta-D-glucanase-like, transcript variant X1	-3.86
Qrob_T0148890.2	protein argonaute 1	-3.85
Qrob_T0268900.2	SNF1-related protein kinase regulatory subunit beta-1	-3.84
Qrob_T0685850.2	auxin-responsive protein IAA9-like	-3.84
Qrob_T0226340.2	1-aminocyclopropane-1-carboxylate synthase 7	-3.83
Qrob_T0702470.2	probable glucan endo-1,3-beta-glucosidase A6	-3.83
Qrob_T0624840.2	dynamin-related protein 3A-like, transcript variant X1	-3.83
Qrob_T0182720.2	two-component response regulator ORR10-like	-3.81
Qrob_T0294540.2	beta-glucuronosyltransferase GlcAT14B-like	-3.8
Qrob_T0119980.2	alpha-galactosidase 1-like	-3.76
Qrob_T0314030.2	early light-induced protein, chloroplastic-like, transcript variant X2	-3.75
Qrob_T0139590.2	homeobox-leucine zipper protein ANTHOCYANINLESS 2-like, transcript variant X2	-3.72
Qrob_T0517950.2		-3.66
Qrob_T0584160.2	tropinone reductase homolog At5g06060-like, transcript variant X1	-3.64
Qrob_T0050860.2	single-stranded DNA-binding protein WHY2, mitochondrial	-3.64
Qrob_T0568810.2	uncharacterized LOC115983185	-3.6
Qrob_T0520540.2	suppressor of disruption of TFIIS	-3.59
Qrob_T0582780.2	probable magnesium transporter NIPA4	-3.59
Qrob_T0088410.2		-3.58
Qrob_T0451680.2	uncharacterized LOC115965348	-3.57
Qrob_T0375650.2	cell number regulator 6-like	-3.56
Qrob_T0606250.2	putative disease resistance protein At1g50180	-3.55
Qrob_T0631180.2	60S acidic ribosomal protein P1	-3.55
Qrob_T0542070.2	cytochrome B5-like protein, transcript variant X2	-3.54
Qrob_T0702890.2		-3.53
Qrob_T0142010.2	activator of 90 kDa heat shock protein ATPase homolog 1	-3.49
Qrob_T0169840.2	signal recognition particle receptor subunit beta-like, transcript variant X1	-3.49
Qrob_T0339720.2		-3.48
Qrob_T0310320.2	GDSL esterase/lipase 4-like	-3.48
Qrob_T0371850.2	secoisolariciresinol dehydrogenase-like	-3.47
Qrob_T0310950.2		-3.46
Qrob_T0410590.2	putative ABC transporter C family member 15, transcript variant X4	-3.46
Qrob_T0342950.2	protein ILITYHIA	-3.45
Qrob_T0624860.2	hemiasterlin resistant protein 1-like	-3.45
Qrob_T0189480.2	putative methyltransferase DDB_G0268948	-3.45
Qrob_T0361600.2	plasmodesmata-located protein 2-like	-3.44
Qrob_T0430910.2	cationic peroxidase 1-like	-3.44
Qrob_T0200780.2	APC membrane recruitment protein 1	-3.44
Qrob_T0158000.2	subtilisin-like protease SBT1.7	-3.43
Qrob_T0689430.2	protease 2-like	-3.43
Qrob_T0515680.2	phosphoenolpyruvate carboxykinase (ATP)-like	-3.42
Qrob_T0501280.2	protein GRAVITROPIC IN THE LIGHT 1	-3.42
Qrob_T0272270.2	uncharacterized LOC115963677	-3.41
Qrob_T0045980.2	organelle RRM domain-containing protein 2, mitochondrial-like	-3.4
Qrob_T0320680.2	probable xyloglucan endotransglucosylase/hydrolase protein 28	-3.4
Qrob_T0598160.2	peroxidase 7-like	-3.39
Qrob_T0369960.2		-3.39
Qrob_T0297370.2	uncharacterized LOC115987395, transcript variant X4	-3.39
Qrob_T0640980.2	caffeic acid 3-O-methyltransferase-like	-3.38
Qrob_T0510980.2	peroxidase 64-like	-3.37
Qrob_T0159450.2	UDP-glycosyltransferase 75C1-like, transcript variant X1	-3.37
Qrob_T0437730.2	transcription factor HY5	-3.37
Qrob_T0535740.2	30S ribosomal protein S16-2, chloroplastic/mitochondrial	-3.37
Qrob_T0635720.2	beta-glucosidase 46-like	-3.37
Qrob_T0274450.2	cyclic nucleotide-gated ion channel 1-like	-3.36
Qrob_T0630380.2	probable 6-phosphogluconolactonase 1, transcript variant X5	-3.36
Qrob_T0597160.2	beta-glucosidase 13-like	-3.35
Qrob_T0649800.2	ABC transporter C family member 2-like, transcript variant X4	-3.34
Qrob_T0751130.2	protein EXORDIUM-like	-3.33
Qrob_T0468050.2	protein MIZU-KUSSEI 1-like	-3.31
Qrob_T0337010.2	E3 ubiquitin-protein ligase SINAT2, transcript variant X2	-3.31
Qrob_T0253880.2	ferredoxin-dependent glutamate synthase, chloroplastic	-3.31
Qrob_T0721580.2	glycine-rich RNA-binding protein RZ1A, transcript variant X2	-3.3
Qrob_T0136460.2		-3.28
Qrob_T0308710.2	elongation factor 1-alpha-like	-3.27
Qrob_T0062560.2		-3.26
Qrob_T0152720.2	BAHD acyltransferase DCR	-3.25
Qrob_T0435880.2		-3.25
Qrob_T0359090.2	protein WVD2-like 3	-3.25
Qrob_T0603070.2	7-deoxyloganetin glucosyltransferase-like	-3.24
Qrob_T0182210.2	non-functional NADPH-dependent codeinone reductase 2-like	-3.23
Qrob_T0136200.2	hyoscyamine 6-dioxygenase-like	-3.21
Qrob_T0669360.2	flavonoid 3',5'-methyltransferase-like, transcript variant X1	-3.2
Qrob_T0417190.2		-3.19
Qrob_T0283860.2	3-dehydroquinate synthase, chloroplastic	-3.18
Qrob_T0631140.2	pyruvate dehydrogenase E1 component subunit alpha-3, chloroplastic	-3.18
Qrob_T0206020.2	dehydrin ERD14-like	-3.16
Qrob_T0221120.2	putative FBD-associated F-box protein At5g56700	-3.16
Qrob_T0358020.2		-3.14
Qrob_T0265810.2	probable LRR receptor-like serine/threonine-protein kinase At1g67720, transcript variant X3	-3.14
Qrob_T0494340.2	probable inactive purple acid phosphatase 27	-3.13
Qrob_T0196330.2	uncharacterized LOC115972291	-3.12
Qrob_T0207570.2	transmembrane protein 184C-like, transcript variant X3	-3.12
Qrob_T0635360.2	protein SIEVE ELEMENT OCCLUSION B-like	-3.11
Qrob_T0224060.2	40S ribosomal protein S21-2-like	-3.11
Qrob_T0093520.2	uridine kinase-like protein 1, chloroplastic	-3.1
Qrob_T0714220.2		-3.08
Qrob_T0317690.2		-3.08
Qrob_T0017140.2	4-coumarate--CoA ligase-like 5	-3.06
Qrob_T0455300.2	18.5 kDa class I heat shock protein-like	-3.06
Qrob_T0457470.2	superoxide dismutase [Mn], mitochondrial-like	-3.06
Qrob_T0490480.2	glycosyl hydrolase 5 family protein-like	-3.05
Qrob_T0382960.2	uncharacterized LOC115987945	-3.03
Qrob_T0276000.2	dimethylnonatriene synthase-like	-3.03
Qrob_T0602040.2		-3.03
Qrob_T0317100.2	stress response protein NST1, transcript variant X1	-3.02
Qrob_T0548540.2	L-lactate dehydrogenase A-like	-3.02
Qrob_T0590900.2	RHOMBOID-like protein 2	-3.02
Qrob_T0272820.2	probable serine/threonine-protein kinase At1g01540	-3.02
Qrob_T0303800.2	uncharacterized LOC115954964	-3
Qrob_T0204460.2	glutathione S-transferase-like	-3
Qrob_T0221140.2	fatty acid amide hydrolase-like	-3
Qrob_T0173980.2		-3
Qrob_T0166070.2	pectinesterase inhibitor 4-like	-2.99
Qrob_T0260960.2	beta-glucosidase 42-like, transcript variant X2	-2.99
Qrob_T0536670.2	RNA-dependent RNA polymerase 2	-2.99
Qrob_T0202250.2	uncharacterized LOC115978978	-2.98
Qrob_T0004890.2	chalcone synthase 1	-2.98
Qrob_T0730960.2	glutamate decarboxylase 1, transcript variant X2	-2.97
Qrob_T0222280.2	endoglucanase 25	-2.96
Qrob_T0240670.2	hsp70 nucleotide exchange factor fes1-like	-2.95
Qrob_T0439940.2	proline-rich protein 1-like	-2.94
Qrob_T0181480.2		-2.94
Qrob_T0269650.2	uncharacterized LOC115955518	-2.94
Qrob_T0006160.2	germin-like protein subfamily 3 member 2	-2.94
Qrob_T0285550.2	pathogenesis-related protein PRB1-3-like	-2.93
Qrob_T0213950.2	secoisolariciresinol dehydrogenase-like	-2.93
Qrob_T0730000.2	cellulose synthase-like protein D5	-2.93
Qrob_T0041140.2	uncharacterized LOC115978640	-2.92
Qrob_T0041400.2	calreticulin	-2.92
Qrob_T0148900.2	sucrose synthase 7-like	-2.91
Qrob_T0235780.2	CTD nuclear envelope phosphatase 1 homolog, transcript variant X1	-2.91
Qrob_T0741630.2	bifunctional nuclease 2-like, transcript variant X4	-2.91
Qrob_T0245430.2		-2.9
Qrob_T0064730.2	protein PYRICULARIA ORYZAE RESISTANCE 21-like, transcript variant X1	-2.88
Qrob_T0711450.2	uncharacterized LOC115968804	-2.88
Qrob_T0649050.2		-2.88
Qrob_T0135090.2	probable xyloglucan endotransglucosylase/hydrolase protein B	-2.87
Qrob_T0241180.2	synaptotagmin-4, transcript variant X3	-2.87
Qrob_T0308010.2	uncharacterized LOC115973904	-2.86
Qrob_T0668970.2		-2.86
Qrob_T0090240.2	cell division protein FtsZ homolog 2-2, chloroplastic-like	-2.86
Qrob_T0055580.2	serine carboxypeptidase-like 25	-2.85
Qrob_T0050570.2	DNA (cytosine-5)-methyltransferase CMT2-like	-2.85
Qrob_T0182100.2	disease resistance response protein 206-like	-2.85
Qrob_T0522990.2	expansin-A12	-2.84
Qrob_T0281550.2	NADH-ubiquinone oxidoreductase 20.9 kDa subunit-like	-2.84
Qrob_T0064170.2		-2.83
Qrob_T0104460.2	cytochrome c6, chloroplastic, transcript variant X4	-2.83
Qrob_T0032390.2	guanosine nucleotide diphosphate dissociation inhibitor 2-like	-2.83
Qrob_T0626490.2	uncharacterized LOC115957799	-2.82
Qrob_T0214990.2	protein DOWNSTREAM OF FLC-like	-2.82
Qrob_T0505670.2	transmembrane 9 superfamily member 2-like, transcript variant X3	-2.82
Qrob_T0062900.2	uncharacterized LOC115976089	-2.82
Qrob_T0641380.2	xyloglucan 6-xylosyltransferase 2	-2.82
Qrob_T0429530.2	tetraspanin-3, transcript variant X2	-2.82
Qrob_T0188080.2	probable pectinesterase/pectinesterase inhibitor 46	-2.81
Qrob_T0560820.2	putative lipase YOR059C, transcript variant X3	-2.81
Qrob_T0104890.2	proteasome subunit alpha type-5	-2.81
Qrob_T0537900.2	cytochrome P450 82G1-like	-2.8
Qrob_T0549610.2	tetraketide alpha-pyrone reductase 1-like	-2.8
Qrob_T0622960.2	WPP domain-interacting tail-anchored protein 2, transcript variant X2	-2.8
Qrob_T0473890.2	uncharacterized LOC115982837	-2.8
Qrob_T0337420.2	uncharacterized oxidoreductase At4g09670	-2.79
Qrob_T0293750.2	peroxidase 7-like	-2.78
Qrob_T0064490.2	auxin efflux carrier component 2-like	-2.77
Qrob_T0711120.2		-2.76
Qrob_T0632380.2	cyclin-dependent kinase B2-2	-2.75
Qrob_T0303680.2	receptor protein kinase-like protein ZAR1	-2.75
Qrob_T0483550.2	inactive protein kinase SELMODRAFT_444075, transcript variant X2	-2.75
Qrob_T0363800.2		-2.74
Qrob_T0408580.2	trafficking protein particle complex subunit 3	-2.74
Qrob_T0709970.2	aluminum-activated malate transporter 9-like	-2.73
Qrob_T0562700.2		-2.72
Qrob_T0728280.2	pectin acetylesterase 6-like	-2.72
Qrob_T0104950.2	protein EXORDIUM-like 7	-2.72
Qrob_T0359400.2	mitochondrial import receptor subunit TOM5 homolog	-2.72
Qrob_T0534620.2	GDP-L-galactose phosphorylase 2	-2.72
Qrob_T0476500.2		-2.71
Qrob_T0192800.2	patatin-like protein 2	-2.71
Qrob_T0390100.2	anthocyanidin 3-O-glucosyltransferase 2-like, transcript variant X2	-2.71
Qrob_T0377170.2	DNA primase small subunit, transcript variant X1	-2.7
Qrob_T0241790.2	proteoglycan 4	-2.7
Qrob_T0264550.2	dnaJ protein ERDJ3B	-2.7
Qrob_T0390480.2	glucan endo-1,3-beta-glucosidase-like	-2.69
Qrob_T0569290.2		-2.69
Qrob_T0189290.2	protein CHROMATIN REMODELING 24, transcript variant X1	-2.69
Qrob_T0516520.2	probable receptor-like serine/threonine-protein kinase At5g57670	-2.68
Qrob_T0108890.2	guanine nucleotide exchange factor SPIKE 1, transcript variant X1	-2.68
Qrob_T0365530.2	probable serine/threonine-protein kinase PIX7, transcript variant X3	-2.68
Qrob_T0224390.2	tubulin alpha chain-like	-2.67
Qrob_T0713540.2	homeobox-leucine zipper protein ATHB-12-like	-2.67
Qrob_T0167890.2	guanylate kinase 2	-2.67
Qrob_T0371800.2	putative lipid phosphate phosphatase 3, chloroplastic, transcript variant X1	-2.67
Qrob_T0455380.2	copper transporter 6-like	-2.66
Qrob_T0067620.2	dynamin-related protein 1C	-2.66
Qrob_T0202200.2	probable aldo-keto reductase 2	-2.66
Qrob_T0040110.2	mitochondrial import receptor subunit TOM40-1	-2.66
Qrob_T0404970.2	multicopper oxidase LPR2-like, transcript variant X2	-2.65
Qrob_T0650120.2	uncharacterized LOC115974400	-2.65
Qrob_T0721220.2		-2.65
Qrob_T0368360.2	uncharacterized LOC115966786	-2.65
Qrob_T0170330.2	uncharacterized LOC115978739	-2.65
Qrob_T0480960.2	probable protein phosphatase 2C 15	-2.64
Qrob_T0473570.2		-2.64
Qrob_T0614140.2	sodium/hydrogen exchanger 1-like, transcript variant X1	-2.64
Qrob_T0144240.2	probable fructokinase-6, chloroplastic	-2.64
Qrob_T0537910.2	cytochrome P450 82G1-like	-2.63
Qrob_T0593940.2	benzyl alcohol O-benzoyltransferase-like	-2.63
Qrob_T0015970.2		-2.63
Qrob_T0159680.2	probable serine/threonine-protein kinase At1g54610	-2.63
Qrob_T0528650.2	ras-related protein Rab7	-2.63
Qrob_T0743100.2	protein yippee-like At4g27745	-2.62
Qrob_T0533790.2	protein SIEVE ELEMENT OCCLUSION B-like	-2.62
Qrob_T0635690.2	beta-glucosidase 45-like, transcript variant X1	-2.62
Qrob_T0045360.2	uncharacterized LOC115977898	-2.62
Qrob_T0226090.2	telomerase Cajal body protein 1	-2.62
Qrob_T0541460.2	pectinesterase inhibitor 9-like	-2.62
Qrob_T0472090.2	solute carrier family 25 member 44-like	-2.62
Qrob_T0495540.2		-2.61
Qrob_T0120110.2	FT-interacting protein 7	-2.61
Qrob_T0663600.2	germin-like protein subfamily 1 member 7	-2.61
Qrob_T0759280.2	30S ribosomal protein S21, chloroplastic, transcript variant X1	-2.61
Qrob_T0436000.2	clathrin heavy chain 1	-2.61
Qrob_T0236000.2		-2.6
Qrob_T0102690.2	inactive leucine-rich repeat receptor-like serine/threonine-protein kinase At1g60630	-2.6
Qrob_T0769870.2	probable sugar phosphate/phosphate translocator At1g12500	-2.6
Qrob_T0477570.2	hydroxymethylglutaryl-CoA synthase	-2.6
Qrob_T0753510.2	mitochondrial phosphate carrier protein 3, mitochondrial-like	-2.6
Qrob_T0475490.2	uncharacterized LOC115976977	-2.59
Qrob_T0313740.2	putative calcium-transporting ATPase 13, plasma membrane-type	-2.58
Qrob_T0464380.2	probable rhamnogalacturonate lyase B, transcript variant X1	-2.58
Qrob_T0235770.2	serine/threonine-protein kinase ppk15, transcript variant X1	-2.58
Qrob_T0738110.2	polyadenylate-binding protein RBP47-like	-2.58
Qrob_T0656470.2	glucan endo-1,3-beta-glucosidase 1	-2.57
Qrob_T0337570.2		-2.57
Qrob_T0453780.2	uncharacterized LOC115966103, transcript variant X2	-2.57
Qrob_T0222320.2	tubulin beta-2 chain-like	-2.57
Qrob_T0563560.2	DNA repair protein RadA, transcript variant X1	-2.57
Qrob_T0599770.2		-2.57
Qrob_T0278470.2		-2.56
Qrob_T0372480.2	tubulin beta-1 chain	-2.56
Qrob_T0204990.2	uncharacterized LOC115974614, transcript variant X2	-2.56
Qrob_T0501610.2	GDSL esterase/lipase CPRD49-like	-2.55
Qrob_T0633190.2	homeobox-leucine zipper protein ATHB-8	-2.55
Qrob_T0058220.2	shikimate O-hydroxycinnamoyltransferase-like	-2.54
Qrob_T0172560.2	L-ascorbate oxidase homolog	-2.54
Qrob_T0349730.2	probable inactive chitinase-like protein LaCIC	-2.53
Qrob_T0107270.2	probable beta-D-xylosidase 2	-2.53
Qrob_T0559380.2		-2.53
Qrob_T0601070.2	LOB domain-containing protein 40-like	-2.53
Qrob_T0303750.2		-2.53
Qrob_T0403630.2	WD repeat and HMG-box DNA-binding protein 1	-2.53
Qrob_T0292020.2	arginine decarboxylase-like	-2.53
Qrob_T0121040.2	protein SIEVE ELEMENT OCCLUSION B-like	-2.52
Qrob_T0628820.2		-2.52
Qrob_T0188100.2	F-box protein SKIP2-like	-2.52
Qrob_T0014170.2	protein IQ-DOMAIN 14-like, transcript variant X1	-2.52
Qrob_T0742910.2	protein AGENET DOMAIN (AGD)-CONTAINING P1-like	-2.51
Qrob_T0430960.2	60S ribosomal protein L38	-2.51
Qrob_T0238590.2	IST1-like protein	-2.5
Qrob_T0736790.2	coatomer subunit beta-1-like	-2.5
Qrob_T0503600.2		-2.49
Qrob_T0349700.2	NAC domain-containing protein 22	-2.49
Qrob_T0149530.2	tyrosine/DOPA decarboxylase 2-like	-2.48
Qrob_T0637800.2	major latex allergen Hev b 5-like	-2.48
Qrob_T0208290.2		-2.48
Qrob_T0062580.2	cytokinin dehydrogenase 6-like	-2.48
Qrob_T0457730.2	endoglucanase 11-like	-2.47
Qrob_T0436350.2	peroxidase 27-like	-2.47
Qrob_T0314000.2	perakine reductase-like	-2.47
Qrob_T0032510.2		-2.46
Qrob_T0360030.2	protein FANTASTIC FOUR 1	-2.46
Qrob_T0765380.2		-2.45
Qrob_T0086540.2	GDSL esterase/lipase At1g31550-like, transcript variant X1	-2.45
Qrob_T0104180.2	mitochondrial outer membrane protein porin of 36 kDa	-2.45
Qrob_T0040870.2		-2.44
Qrob_T0396020.2	uclacyanin 1-like	-2.44
Qrob_T0495360.2		-2.44
Qrob_T0623040.2	endoglucanase 1-like	-2.44
Qrob_T0478570.2	probable glutathione S-transferase	-2.44
Qrob_T0328080.2	transcription factor bHLH84-like	-2.43
Qrob_T0426910.2	cytochrome P450 CYP736A12-like	-2.43
Qrob_T0032660.2	WAT1-related protein At5g40240-like	-2.43
Qrob_T0722810.2	laccase-17-like	-2.41
Qrob_T0053220.2	uncharacterized LOC115995413, transcript variant X1	-2.41
Qrob_T0351420.2	thaumatin-like protein	-2.41
Qrob_T0743110.2	calcium-binding protein KIC	-2.41
Qrob_T0030280.2	nucleobase-ascorbate transporter 6-like, transcript variant X3	-2.41
Qrob_T0002820.2	probable leucine-rich repeat receptor-like protein kinase At1g35710	-2.41
Qrob_T0702160.2	trifunctional UDP-glucose 4,6-dehydratase/UDP-4-keto-6-deoxy-D-glucose 3,5-epimerase/UDP-4-keto-L-rhamnose-reductase RHM2-like	-2.4
Qrob_T0247370.2	rac-like GTP-binding protein RAC2	-2.4
Qrob_T0618990.2	capsanthin/capsorubin synthase, chromoplastic-like	-2.4
Qrob_T0125670.2		-2.4
Qrob_T0666860.2	serine/threonine-protein phosphatase 2A 65 kDa regulatory subunit A beta isoform-like, transcript variant X2	-2.4
Qrob_T0111350.2	reticulon-like protein B14	-2.39
Qrob_T0032930.2	gibberellin-regulated protein 14-like	-2.39
Qrob_T0200350.2	peroxidase 73-like	-2.39
Qrob_T0485350.2	uncharacterized LOC115977086, transcript variant X2	-2.39
Qrob_T0448710.2	transmembrane protein 87B	-2.39
Qrob_T0274850.2	dirigent protein 22-like	-2.38
Qrob_T0037300.2	cell division control protein 45 homolog	-2.38
Qrob_T0283820.2	heavy metal-associated isoprenylated plant protein 26-like	-2.38
Qrob_T0158680.2	probable amidase At4g34880, transcript variant X1	-2.38
Qrob_T0624390.2	deoxyuridine 5'-triphosphate nucleotidohydrolase-like, transcript variant X1	-2.38
Qrob_T0025240.2	abscisic acid receptor PYR1-like	-2.38
Qrob_T0503290.2	transcription factor MYBS1	-2.37
Qrob_T0224550.2		-2.37
Qrob_T0219530.2	kinesin-like protein KIN-13B, transcript variant X1	-2.37
Qrob_T0455470.2	uncharacterized LOC115985691, transcript variant X1	-2.37
Qrob_T0300520.2	50S ribosomal protein L21, chloroplastic	-2.37
Qrob_T0752870.2		-2.36
Qrob_T0417970.2	annexin D2	-2.36
Qrob_T0468020.2	uncharacterized LOC115974231, transcript variant X1	-2.36
Qrob_T0705550.2	glycerol-3-phosphate 2-O-acyltransferase 4-like	-2.36
Qrob_T0317720.2	GDSL esterase/lipase At4g10955	-2.36
Qrob_T0755370.2	uncharacterized LOC115974943	-2.36
Qrob_T0232820.2	somatic embryogenesis receptor kinase 2	-2.35
Qrob_T0495130.2		-2.35
Qrob_T0439770.2	ribosomal protein S14, mitochondrial-like	-2.35
Qrob_T0527760.2	putative pectinesterase 11	-2.34
Qrob_T0257200.2	DNA damage-repair/toleration protein DRT100-like	-2.34
Qrob_T0130540.2		-2.34
Qrob_T0521360.2	cinnamoyl-CoA reductase 1	-2.34
Qrob_T0216630.2	importin beta-like SAD2 homolog, transcript variant X1	-2.34
Qrob_T0457180.2	WRKY DNA-binding transcription factor 70	-2.33
Qrob_T0350390.2	polygalacturonase-1 non-catalytic subunit beta-like, transcript variant X2	-2.32
Qrob_T0533710.2	uncharacterized LOC115989170	-2.32
Qrob_T0751090.2		-2.32
Qrob_T0090950.2		-2.32
Qrob_T0251970.2	cell division cycle protein 48 homolog	-2.32
Qrob_T0120820.2	auxin response factor 9	-2.32
Qrob_T0374860.2	luminal-binding protein 5	-2.32
Qrob_T0721400.2	probable dolichyl-diphosphooligosaccharide--protein glycosyltransferase subunit 3B	-2.32
Qrob_T0021320.2		-2.31
Qrob_T0260510.2	phosphatidate cytidylyltransferase 2-like, transcript variant X2	-2.3
Qrob_T0489140.2	protein LONGIFOLIA 1	-2.29
Qrob_T0352070.2	thaumatin-like protein	-2.29
Qrob_T0152500.2		-2.29
Qrob_T0236650.2		-2.29
Qrob_T0357720.2		-2.28
Qrob_T0364600.2	hippocampus abundant transcript-like protein 1, transcript variant X2	-2.28
Qrob_T0067570.2	cleavage and polyadenylation specificity factor subunit 3-II	-2.28
Qrob_T0541010.2	alpha-dioxygenase 2, transcript variant X6	-2.27
Qrob_T0327610.2	fasciclin-like arabinogalactan protein 11	-2.27
Qrob_T0458020.2	L-type lectin-domain containing receptor kinase VIII.2-like	-2.27
Qrob_T0735140.2	UDP-glycosyltransferase 74E2-like	-2.27
Qrob_T0104530.2	AAA-ATPase At2g18193-like	-2.26
Qrob_T0652020.2	auxin-responsive protein IAA20-like	-2.26
Qrob_T0562390.2	protein GIGANTEA-like	-2.26
Qrob_T0681730.2	ankyrin repeat domain-containing protein 13C	-2.26
Qrob_T0708870.2		-2.26
Qrob_T0383050.2	protein trichome birefringence-like 34	-2.25
Qrob_T0759130.2		-2.25
Qrob_T0573930.2		-2.25
Qrob_T0121030.2	protein SIEVE ELEMENT OCCLUSION B-like	-2.25
Qrob_T0216700.2	polygalacturonase At1g48100	-2.25
Qrob_T0379130.2	14 kDa proline-rich protein DC2.15-like	-2.25
Qrob_T0715660.2	cationic peroxidase 1-like	-2.25
Qrob_T0305820.2	external alternative NAD(P)H-ubiquinone oxidoreductase B2, mitochondrial	-2.25
Qrob_T0313910.2	stem-specific protein TSJT1	-2.25
Qrob_T0437630.2	laccase-6	-2.24
Qrob_T0409890.2	MLP-like protein 31	-2.24
Qrob_T0056550.2		-2.24
Qrob_T0478860.2	serine/threonine-protein kinase WAG2-like	-2.24
Qrob_T0064310.2	sucrose synthase 5-like	-2.24
Qrob_T0142830.2	pentatricopeptide repeat-containing protein At2g20540-like	-2.24
Qrob_T0155280.2		-2.24
Qrob_T0087420.2	WAT1-related protein At5g07050	-2.24
Qrob_T0328980.2	membrane magnesium transporter	-2.24
Qrob_T0474590.2	aspartic proteinase-like	-2.24
Qrob_T0154220.2	putative lipid-binding protein AIR1, transcript variant X1	-2.23
Qrob_T0300350.2	ABC transporter G family member 25	-2.23
Qrob_T0002940.2	putative SNAP25 homologous protein SNAP30, transcript variant X2	-2.23
Qrob_T0333410.2	2-alkenal reductase (NADP(+)-dependent)-like	-2.23
Qrob_T0554530.2	GDP-mannose 3,5-epimerase 2	-2.23
Qrob_T0749980.2	abscisic-aldehyde oxidase-like	-2.23
Qrob_T0496750.2	NAP1-related protein 2-like	-2.23
Qrob_T0474620.2	putative pectate lyase 2	-2.22
Qrob_T0393870.2	fatty acyl-CoA reductase 3-like	-2.22
Qrob_T0155760.2	9-cis-epoxycarotenoid dioxygenase NCED1, chloroplastic	-2.22
Qrob_T0409510.2		-2.22
Qrob_T0577770.2	uncharacterized LOC115950896	-2.22
Qrob_T0271230.2	CDPK-related kinase 5-like, transcript variant X1	-2.22
Qrob_T0481540.2	transcription factor BIM1	-2.22
Qrob_T0460180.2	pyrophosphate--fructose 6-phosphate 1-phosphotransferase subunit beta	-2.22
Qrob_T0411100.2	transcription factor CSA	-2.22
Qrob_T0438070.2	probable methyltransferase PMT14, transcript variant X2	-2.22
Qrob_T0492300.2	receptor-like protein 15	-2.21
Qrob_T0148870.2	NAC domain-containing protein 86-like	-2.21
Qrob_T0059350.2	UPF0481 protein At3g47200-like, transcript variant X1	-2.21
Qrob_T0172780.2	dof zinc finger protein DOF3.4	-2.21
Qrob_T0504970.2	fatty-acid-binding protein 3, chloroplastic-like, transcript variant X1	-2.21
Qrob_T0146580.2	F-box protein At5g51370	-2.21
Qrob_T0320030.2	late embryogenesis abundant protein At1g64065-like	-2.21
Qrob_T0387650.2	equilibrative nucleotide transporter 8	-2.2
Qrob_T0514760.2	putative receptor protein kinase ZmPK1	-2.2
Qrob_T0689620.2	protein WALLS ARE THIN 1	-2.2
Qrob_T0350120.2	uncharacterized LOC115967275	-2.2
Qrob_T0198030.2	endoglucanase 5	-2.19
Qrob_T0715590.2	transcription factor bHLH61-like	-2.19
Qrob_T0641230.2	kinesin-like protein KIN-13A, transcript variant X2	-2.19
Qrob_T0542810.2	heat shock protein 83-like	-2.19
Qrob_T0636890.2	thioredoxin-like protein Clot	-2.19
Qrob_T0519170.2		-2.18
Qrob_T0390500.2	glucan endo-1,3-beta-glucosidase-like	-2.18
Qrob_T0509250.2	uncharacterized LOC115965341	-2.18
Qrob_T0123990.2	S-norcoclaurine synthase 2-like	-2.18
Qrob_T0018340.2		-2.18
Qrob_T0426010.2		-2.17
Qrob_T0475370.2	auxin-responsive protein IAA1-like	-2.17
Qrob_T0527230.2	serine carboxypeptidase-like	-2.17
Qrob_T0082450.2		-2.17
Qrob_T0068120.2	non-specific lipid-transfer protein-like protein At2g13820, transcript variant X2	-2.17
Qrob_T0243060.2		-2.17
Qrob_T0446640.2	ribonuclease 2	-2.17
Qrob_T0388020.2	probable flavin-containing monooxygenase 1	-2.16
Qrob_T0527780.2	phenylcoumaran benzylic ether reductase Betv6	-2.16
Qrob_T0697140.2	stem-specific protein TSJT1	-2.16
Qrob_T0706060.2	mitotic checkpoint serine/threonine-protein kinase BUB1	-2.16
Qrob_T0377210.2	endoglucanase 6, transcript variant X1	-2.16
Qrob_T0344180.2	O-fucosyltransferase 9, transcript variant X1	-2.16
Qrob_T0343510.2	photosynthetic NDH subunit of lumenal location 5, chloroplastic	-2.16
Qrob_T0650760.2	uncharacterized LOC115976564	-2.16
Qrob_T0187680.2	TMV resistance protein N-like, transcript variant X2	-2.15
Qrob_T0622190.2	uncharacterized LOC115989757	-2.15
Qrob_T0321750.2	RNA polymerase sigma factor sigE, chloroplastic/mitochondrial, transcript variant X3	-2.15
Qrob_T0046180.2	soluble inorganic pyrophosphatase 1-like	-2.15
Qrob_T0036280.2		-2.14
Qrob_T0237570.2	dirigent protein 22-like	-2.14
Qrob_T0666150.2	alpha-L-fucosidase 1-like, transcript variant X1	-2.14
Qrob_T0373710.2		-2.14
Qrob_T0274440.2	cyclic nucleotide-gated ion channel 1-like, transcript variant X2	-2.14
Qrob_T0416870.2	(R)-mandelonitrile lyase-like	-2.14
Qrob_T0275680.2	vesicle-associated protein 2-2-like, transcript variant X1	-2.14
Qrob_T0222270.2	ferric reduction oxidase 7, chloroplastic-like	-2.14
Qrob_T0405020.2	uncharacterized protein At1g66480	-2.13
Qrob_T0659080.2	protein trichome birefringence-like 37	-2.12
Qrob_T0404690.2	uncharacterized LOC115960851	-2.12
Qrob_T0177390.2	fatty-acid-binding protein 1, transcript variant X1	-2.12
Qrob_T0008730.2	phosphate transporter PHO1 homolog 1	-2.12
Qrob_T0358560.2	protein POLYCHOME-like, transcript variant X2	-2.12
Qrob_T0241030.2	polygalacturonase QRT3-like	-2.12
Qrob_T0377590.2	rac-like GTP-binding protein 5	-2.12
Qrob_T0666830.2	uncharacterized LOC115964025	-2.12
Qrob_T0332870.2	outer envelope pore protein 16-3, chloroplastic/mitochondrial	-2.12
Qrob_T0530640.2	dnaJ protein homolog	-2.12
Qrob_T0146150.2	nicotianamine synthase-like	-2.11
Qrob_T0046520.2	protein SIEVE ELEMENT OCCLUSION B-like	-2.11
Qrob_T0583150.2		-2.11
Qrob_T0109780.2	rac-like GTP-binding protein ARAC7	-2.11
Qrob_T0762950.2	ninja-family protein AFP3-like	-2.11
Qrob_T0032970.2		-2.1
Qrob_T0154210.2	putative lipid-binding protein AIR1, transcript variant X1	-2.1
Qrob_T0707320.2	serine carboxypeptidase-like 45	-2.1
Qrob_T0367610.2	probable xyloglucan glycosyltransferase 5	-2.1
Qrob_T0464600.2	protein ODORANT1-like	-2.1
Qrob_T0014270.2	probable (S)-N-methylcoclaurine 3'-hydroxylase isozyme 2	-2.1
Qrob_T0376820.2	acyl-CoA-binding domain-containing protein 3	-2.1
Qrob_T0555400.2	ribulose-phosphate 3-epimerase, chloroplastic	-2.1
Qrob_T0357210.2	GATA transcription factor 9-like	-2.09
Qrob_T0641040.2		-2.09
Qrob_T0571450.2	ycf49-like protein, transcript variant X1	-2.09
Qrob_T0581590.2	protein MANNAN SYNTHESIS-RELATED 1-like	-2.09
Qrob_T0069950.2	protein EDS1B-like	-2.09
Qrob_T0695600.2	uncharacterized LOC115975306	-2.09
Qrob_T0565250.2	ADP-ribosylation factor GTPase-activating protein AGD5-like, transcript variant X2	-2.09
Qrob_T0533120.2	beta-glucosidase 12-like	-2.08
Qrob_T0398450.2	cytochrome P450 81Q32-like	-2.08
Qrob_T0768730.2	GDP-mannose 4,6 dehydratase 1	-2.08
Qrob_T0029220.2	pyruvate decarboxylase 1	-2.08
Qrob_T0014350.2	BAG family molecular chaperone regulator 1	-2.08
Qrob_T0275650.2	serine/threonine-protein kinase RUNKEL	-2.08
Qrob_T0247010.2	probable receptor-like protein kinase At5g18500, transcript variant X2	-2.08
Qrob_T0426430.2	fasciclin-like arabinogalactan protein 4	-2.08
Qrob_T0501630.2		-2.08
Qrob_T0157520.2		-2.07
Qrob_T0278790.2	sulfate transporter 3.1-like	-2.07
Qrob_T0095840.2	protein S-acyltransferase 18	-2.07
Qrob_T0439720.2	beta-glucosidase 44-like	-2.07
Qrob_T0731950.2	uncharacterized LOC115986906	-2.07
Qrob_T0059100.2	RING-H2 finger protein ATL32-like	-2.07
Qrob_T0182090.2	bifunctional aspartate aminotransferase and glutamate/aspartate-prephenate aminotransferase-like	-2.06
Qrob_T0090290.2	60S ribosomal protein L10a	-2.06
Qrob_T0570480.2		-2.06
Qrob_T0426570.2	U-box domain-containing protein 13, transcript variant X1	-2.06
Qrob_T0369950.2		-2.06
Qrob_T0466390.2		-2.05
Qrob_T0547250.2		-2.05
Qrob_T0351380.2	AAA-ATPase ASD, mitochondrial-like	-2.05
Qrob_T0279750.2	callose synthase 3, transcript variant X2	-2.05
Qrob_T0182170.2	cation/H(+) antiporter 18-like, transcript variant X2	-2.05
Qrob_T0126140.2	receptor-like protein 47	-2.04
Qrob_T0406690.2		-2.04
Qrob_T0423310.2	aldehyde dehydrogenase family 2 member C4-like	-2.04
Qrob_T0627350.2	LOB domain-containing protein 16-like	-2.04
Qrob_T0649350.2	purple acid phosphatase 22-like	-2.04
Qrob_T0527500.2	heparanase-like protein 3, transcript variant X1	-2.04
Qrob_T0055430.2	protein LONGIFOLIA 2-like, transcript variant X3	-2.04
Qrob_T0579980.2	prostatic spermine-binding protein, transcript variant X2	-2.04
Qrob_T0549580.2	cinnamoyl-CoA reductase 1-like	-2.03
Qrob_T0510930.2	probable cinnamyl alcohol dehydrogenase 6	-2.03
Qrob_T0342600.2	phospho-2-dehydro-3-deoxyheptonate aldolase 2, chloroplastic	-2.03
Qrob_T0151690.2	glutathione S-transferase-like	-2.03
Qrob_T0609730.2	putative E3 ubiquitin-protein ligase RING1a	-2.03
Qrob_T0365380.2		-2.03
Qrob_T0721410.2	nuclear transport factor 2B	-2.03
Qrob_T0423290.2		-2.03
Qrob_T0664090.2	uncharacterized LOC115952863	-2.03
Qrob_T0019800.2		-2.02
Qrob_T0082210.2		-2.02
Qrob_T0200360.2		-2.02
Qrob_T0455310.2	18.5 kDa class I heat shock protein-like	-2.02
Qrob_T0659090.2	protein trichome birefringence-like 38	-2.02
Qrob_T0455550.2		-2.02
Qrob_T0382260.2	3-isopropylmalate dehydratase large subunit, chloroplastic	-2.02
Qrob_T0496480.2	actin-depolymerizing factor 2	-2.02
Qrob_T0098260.2	(-)-isopiperitenol/(-)-carveol dehydrogenase, mitochondrial-like	-2.02
Qrob_T0345420.2	GMP synthase [glutamine-hydrolyzing], transcript variant X2	-2.02
Qrob_T0365510.2	6-phosphogluconate dehydrogenase, decarboxylating 3, chloroplastic	-2.02
Qrob_T0474980.2	cysteine-rich repeat secretory protein 38-like	-2.01
Qrob_T0457090.2	beta-amyrin 28-monooxygenase-like	-2.01
Qrob_T0739270.2	uncharacterized LOC115953302	-2.01
Qrob_T0463420.2	uncharacterized LOC115979016	-2.01
Qrob_T0236170.2		-2.01
Qrob_T0748360.2	chlorophyll a-b binding protein of LHCII type 1-like	-2
Qrob_T0393830.2	fatty acyl-CoA reductase 3-like, transcript variant X2	-2
Qrob_T0714230.2	cell division control protein 2 homolog C	-2
Qrob_T0121990.2	G-box-binding factor 3-like, transcript variant X3	-2
Qrob_T0434310.2	glucan endo-1,3-beta-glucosidase	-2
Qrob_T0654420.2	transmembrane protein 87B	-2
Qrob_T0189020.2	adenosylhomocysteinase	-2
Qrob_T0608020.2	very-long-chain enoyl-CoA reductase	-2
Qrob_T0466560.2		-2
Qrob_T0292030.2	ubiquitin fusion degradation protein 1 homolog	-2
Qrob_T0008070.2		-1.99
Qrob_T0336110.2	BAG family molecular chaperone regulator 4-like	-1.99
Qrob_T0711130.2		-1.99
Qrob_T0396680.2	aspartyl protease AED3	-1.99
Qrob_T0054840.2		-1.99
Qrob_T0733100.2		-1.99
Qrob_T0696430.2	mavicyanin-like	-1.99
Qrob_T0685730.2	protein NRT1/ PTR FAMILY 3.1, transcript variant X1	-1.99
Qrob_T0268950.2	oligoribonuclease, transcript variant X1	-1.99
Qrob_T0674180.2	protein LHCP TRANSLOCATION DEFECT-like	-1.99
Qrob_T0697200.2	dual specificity protein phosphatase 1-like	-1.99
Qrob_T0598970.2	proteasome subunit alpha type-1-B-like	-1.99
Qrob_T0032520.2	MLO-like protein 1	-1.99
Qrob_T0560610.2		-1.98
Qrob_T0682370.2		-1.98
Qrob_T0390410.2	glucan endo-1,3-beta-glucosidase-like	-1.98
Qrob_T0219700.2	protein IMPAIRED IN BABA-INDUCED STERILITY 1-like	-1.98
Qrob_T0362990.2	expansin-A10-like	-1.98
Qrob_T0122270.2	farnesyl pyrophosphate synthase 1, transcript variant X1	-1.98
Qrob_T0750280.2		-1.98
Qrob_T0580000.2	protein REDUCED WALL ACETYLATION 2, transcript variant X2	-1.98
Qrob_T0687860.2	glutathione S-transferase T1	-1.98
Qrob_T0700110.2	LIM domain-containing protein WLIM2b	-1.97
Qrob_T0310290.2	GDSL esterase/lipase 1-like	-1.97
Qrob_T0173320.2		-1.96
Qrob_T0338950.2	uncharacterized protein At1g08160-like	-1.96
Qrob_T0243930.2	glutaredoxin-C1-like	-1.96
Qrob_T0265690.2		-1.96
Qrob_T0184380.2	GTP-binding protein SAR1A	-1.96
Qrob_T0157640.2	cytochrome c-like	-1.96
Qrob_T0099850.2	aminoacylase-1-like, transcript variant X1	-1.96
Qrob_T0738830.2		-1.95
Qrob_T0207500.2	uncharacterized LOC115955229	-1.95
Qrob_T0168390.2	protein MICROTUBULE BINDING PROTEIN 2C	-1.95
Qrob_T0430420.2	PI-PLC X domain-containing protein At5g67130-like, transcript variant X1	-1.95
Qrob_T0422720.2	receptor protein-tyrosine kinase CEPR2, transcript variant X3	-1.95
Qrob_T0493470.2	respiratory burst oxidase homolog protein B-like	-1.95
Qrob_T0110250.2	START domain-containing protein 10	-1.94
Qrob_T0613160.2	high mobility group B protein 6-like	-1.94
Qrob_T0383130.2	gamma-interferon-responsive lysosomal thiol protein	-1.94
Qrob_T0593330.2	protein IQ-DOMAIN 1	-1.94
Qrob_T0108880.2	guanine nucleotide exchange factor SPIKE 1, transcript variant X2	-1.94
Qrob_T0724630.2	beta-amyrin 28-monooxygenase-like	-1.94
Qrob_T0689480.2	LRR receptor-like serine/threonine-protein kinase FLS2	-1.94
Qrob_T0149180.2	mitogen-activated protein kinase kinase kinase YODA	-1.94
Qrob_T0198060.2	60S ribosomal protein L44-like	-1.94
Qrob_T0085370.2	auxin response factor 3	-1.94
Qrob_T0338490.2	linoleate 13S-lipoxygenase 2-1, chloroplastic-like	-1.93
Qrob_T0315440.2	GDSL esterase/lipase At5g22810	-1.93
Qrob_T0748810.2	uncharacterized protein At1g65710-like	-1.93
Qrob_T0015510.2	UDP-glycosyltransferase 74E2-like	-1.93
Qrob_T0314390.2	BTB/POZ domain-containing protein NPY2-like, transcript variant X3	-1.93
Qrob_T0350330.2	isoamylase 1, chloroplastic, transcript variant X3	-1.93
Qrob_T0412580.2	uncharacterized LOC115992618	-1.93
Qrob_T0708920.2		-1.93
Qrob_T0642460.2	probable mediator of RNA polymerase II transcription subunit 37e	-1.93
Qrob_T0466450.2	protein THYLAKOID FORMATION1, chloroplastic	-1.93
Qrob_T0673430.2	loganic acid O-methyltransferase-like	-1.92
Qrob_T0632400.2	UDP-glycosyltransferase 74E2-like	-1.92
Qrob_T0504410.2	protein DETOXIFICATION 12-like	-1.92
Qrob_T0594050.2	DNA-binding protein SMUBP-2	-1.92
Qrob_T0124070.2	probable calcium-binding protein CML18	-1.92
Qrob_T0580130.2		-1.92
Qrob_T0026850.2	uncharacterized LOC115960719	-1.92
Qrob_T0032340.2	uncharacterized LOC115965336, transcript variant X2	-1.92
Qrob_T0360270.2	sugar transporter ERD6-like 5, transcript variant X6	-1.92
Qrob_T0188950.2	probable glucan 1,3-alpha-glucosidase	-1.92
Qrob_T0623100.2	protein IQ-DOMAIN 1-like	-1.91
Qrob_T0007460.2	gibberellin-regulated protein 6-like	-1.91
Qrob_T0135890.2	acid phosphatase 1-like	-1.91
Qrob_T0561140.2		-1.91
Qrob_T0270750.2		-1.91
Qrob_T0482630.2	probable inorganic phosphate transporter 1-8	-1.91
Qrob_T0328570.2	endo-1,3;1,4-beta-D-glucanase-like	-1.91
Qrob_T0641490.2	uncharacterized LOC115977444, transcript variant X2	-1.91
Qrob_T0502460.2		-1.91
Qrob_T0203550.2	cyclase-like protein 2	-1.91
Qrob_T0201310.2	thaumatin-like protein	-1.9
Qrob_T0458910.2	germin-like protein subfamily 3 member 4	-1.9
Qrob_T0549640.2	tetraketide alpha-pyrone reductase 1-like	-1.9
Qrob_T0003680.2	LRR receptor-like serine/threonine-protein kinase RPK2	-1.9
Qrob_T0030310.2	protein ALTERED XYLOGLUCAN 4, transcript variant X1	-1.9
Qrob_T0175160.2	leucoanthocyanidin reductase-like	-1.9
Qrob_T0731390.2	G-type lectin S-receptor-like serine/threonine-protein kinase At5g24080	-1.9
Qrob_T0563570.2		-1.9
Qrob_T0393880.2	fatty acyl-CoA reductase 3-like	-1.89
Qrob_T0678340.2	uncharacterized LOC115995188	-1.89
Qrob_T0320670.2	probable transmembrane ascorbate ferrireductase 3	-1.89
Qrob_T0541850.2	stomatal closure-related actin-binding protein 3-like, transcript variant X2	-1.89
Qrob_T0580600.2	hydroxyproline O-arabinosyltransferase 3-like, transcript variant X6	-1.89
Qrob_T0142120.2	peroxidase A2-like	-1.89
Qrob_T0184080.2	aspartic proteinase PCS1	-1.89
Qrob_T0589160.2	granule-bound starch synthase 1, chloroplastic/amyloplastic, transcript variant X2	-1.89
Qrob_T0241160.2	cucumber peeling cupredoxin-like	-1.89
Qrob_T0462050.2		-1.89
Qrob_T0716090.2	laccase-4-like	-1.88
Qrob_T0388890.2	transcription factor MYB26	-1.88
Qrob_T0223800.2	probably inactive leucine-rich repeat receptor-like protein kinase IMK2	-1.88
Qrob_T0536130.2	protein CNGC15b-like	-1.88
Qrob_T0735310.2	187-kDa microtubule-associated protein AIR9, transcript variant X2	-1.88
Qrob_T0705670.2	probable inactive purple acid phosphatase 29	-1.88
Qrob_T0142660.2	GDSL esterase/lipase At1g74460	-1.88
Qrob_T0622890.2	alpha/beta hydrolase domain-containing protein 17B-like	-1.88
Qrob_T0103440.2	metal tolerance protein 10-like, transcript variant X2	-1.88
Qrob_T0509640.2	alpha-xylosidase 1-like	-1.88
Qrob_T0348540.2	auxin transporter-like protein 2, transcript variant X3	-1.88
Qrob_T0587340.2	G-type lectin S-receptor-like serine/threonine-protein kinase CES101	-1.87
Qrob_T0705850.2		-1.87
Qrob_T0420670.2	alpha-galactosidase-like, transcript variant X3	-1.87
Qrob_T0247820.2	vacuolar iron transporter 1-like, transcript variant X2	-1.87
Qrob_T0392850.2	anthocyanidin 3-O-glucosyltransferase 2-like	-1.87
Qrob_T0763910.2	probable methyltransferase PMT18, transcript variant X4	-1.87
Qrob_T0457120.2	protein NETWORKED 4A-like, transcript variant X3	-1.87
Qrob_T0488130.2	28S ribosomal protein S29, mitochondrial-like	-1.87
Qrob_T0372420.2	uncharacterized LOC115960406	-1.87
Qrob_T0309540.2	cell division control protein 2 homolog A	-1.87
Qrob_T0463170.2	thioredoxin H5-like	-1.86
Qrob_T0208110.2	putative laccase-9, transcript variant X2	-1.86
Qrob_T0196750.2		-1.86
Qrob_T0045510.2	peamaclein	-1.86
Qrob_T0502940.2	cytochrome P450 711A1	-1.86
Qrob_T0387080.2	proteasome subunit alpha type-7-like	-1.86
Qrob_T0377600.2	ubiquitin-conjugating enzyme E2 10-like	-1.86
Qrob_T0294600.2	NHP2-like protein 1	-1.86
Qrob_T0402350.2		-1.86
Qrob_T0756860.2		-1.85
Qrob_T0689820.2	beta-amyrin 28-monooxygenase-like, transcript variant X3	-1.85
Qrob_T0713590.2	peroxidase 51-like, transcript variant X1	-1.85
Qrob_T0480140.2	DEAD-box ATP-dependent RNA helicase 5	-1.85
Qrob_T0384650.2	transcription factor BHLH089, transcript variant X3	-1.85
Qrob_T0264470.2	uncharacterized LOC115970496	-1.85
Qrob_T0451260.2	protein QUIRKY	-1.85
Qrob_T0396700.2	probable pectinesterase/pectinesterase inhibitor 41	-1.85
Qrob_T0126180.2	LRR receptor-like serine/threonine-protein kinase	-1.85
Qrob_T0313240.2	fasciclin-like arabinogalactan protein 16	-1.85
Qrob_T0045960.2	3beta-hydroxysteroid-dehydrogenase/decarboxylase-like	-1.85
Qrob_T0650150.2	NADH-cytochrome b5 reductase-like protein	-1.85
Qrob_T0689720.2		-1.84
Qrob_T0082280.2	Golgi apparatus membrane protein-like protein ECHIDNA	-1.84
Qrob_T0457720.2	protein NRT1/ PTR FAMILY 6.4	-1.84
Qrob_T0037180.2	uncharacterized LOC115959817	-1.84
Qrob_T0115360.2	proteasome subunit beta type-6	-1.84
Qrob_T0251880.2	ubiquitin domain-containing protein DSK2b-like	-1.84
Qrob_T0711170.2		-1.83
Qrob_T0422160.2	heavy metal-associated isoprenylated plant protein 9	-1.83
Qrob_T0534560.2	condensin complex subunit 2-like	-1.83
Qrob_T0178310.2	homeobox-leucine zipper protein ATHB-7-like	-1.83
Qrob_T0337430.2	cytochrome P450 78A7-like	-1.83
Qrob_T0615950.2	DNA replication licensing factor MCM2	-1.83
Qrob_T0206950.2		-1.83
Qrob_T0069940.2	protein EDS1B-like	-1.83
Qrob_T0323400.2	condensin complex subunit 1	-1.83
Qrob_T0742460.2	uncharacterized LOC115960701, transcript variant X3	-1.83
Qrob_T0713640.2	uncharacterized LOC115969839	-1.83
Qrob_T0390810.2	protein RETICULATA-RELATED 4, chloroplastic	-1.83
Qrob_T0530620.2	putative phosphatidylglycerol/phosphatidylinositol transfer protein DDB_G0282179	-1.83
Qrob_T0114590.2		-1.82
Qrob_T0035400.2	transcription factor HY5-like	-1.82
Qrob_T0731780.2	dirigent protein 22-like	-1.82
Qrob_T0580580.2	non-specific phospholipase C2	-1.82
Qrob_T0208730.2	bifunctional 3-dehydroquinate dehydratase/shikimate dehydrogenase, chloroplastic-like	-1.82
Qrob_T0738120.2	uroporphyrinogen-III synthase, chloroplastic, transcript variant X2	-1.82
Qrob_T0547090.2	glycine-rich domain-containing protein 1, transcript variant X2	-1.82
Qrob_T0120090.2		-1.82
Qrob_T0371750.2	amino-acid permease BAT1 homolog, transcript variant X2	-1.82
Qrob_T0542750.2		-1.82
Qrob_T0258780.2	60S ribosomal protein L31-like	-1.82
Qrob_T0665070.2	uncharacterized LOC115995296	-1.81
Qrob_T0124680.2		-1.81
Qrob_T0396600.2	transcription factor bHLH30-like	-1.81
Qrob_T0347780.2	DNA replication licensing factor MCM6	-1.81
Qrob_T0647300.2	kinesin-like protein KIN-5B	-1.81
Qrob_T0598320.2	serine/threonine-protein kinase RUNKEL-like	-1.8
Qrob_T0678710.2	uncharacterized LOC115954889, transcript variant X3	-1.8
Qrob_T0338890.2	probable histone H2B.1	-1.8
Qrob_T0478760.2	probable glutathione S-transferase	-1.8
Qrob_T0371970.2	mitochondrial dicarboxylate/tricarboxylate transporter DTC	-1.8
Qrob_T0173930.2		-1.79
Qrob_T0715490.2	septum-promoting GTP-binding protein 1-like	-1.79
Qrob_T0222330.2	putative deoxyribonuclease TATDN1	-1.79
Qrob_T0121400.2	myb-related protein 315	-1.79
Qrob_T0564840.2	dnaJ homolog subfamily B member 4	-1.79
Qrob_T0492400.2	homeobox-DDT domain protein RLT3, transcript variant X1	-1.79
Qrob_T0486750.2	succinate dehydrogenase assembly factor 1, mitochondrial-like	-1.79
Qrob_T0015990.2	multisubstrate pseudouridine synthase 7, transcript variant X1	-1.79
Qrob_T0110190.2	GTPase Der, transcript variant X2	-1.79
Qrob_T0104490.2	phosphoglycerate kinase, cytosolic-like	-1.79
Qrob_T0542970.2	caffeic acid 3-O-methyltransferase-like	-1.78
Qrob_T0629470.2	peroxidase 5-like	-1.78
Qrob_T0125380.2	salicylate carboxymethyltransferase-like	-1.78
Qrob_T0317750.2	cytochrome b561 domain-containing protein At4g18260-like, transcript variant X1	-1.78
Qrob_T0669630.2	aspartic proteinase nepenthesin-1	-1.78
Qrob_T0123830.2	transcription factor MYB53-like	-1.78
Qrob_T0310480.2	GDSL esterase/lipase 5-like	-1.78
Qrob_T0099790.2	probable L-cysteine desulfhydrase, chloroplastic, transcript variant X1	-1.78
Qrob_T0364010.2	3-epi-6-deoxocathasterone 23-monooxygenase CYP90D1	-1.78
Qrob_T0514210.2		-1.77
Qrob_T0384430.2		-1.77
Qrob_T0401920.2	haloacid dehalogenase-like hydrolase domain-containing protein 3, transcript variant X2	-1.77
Qrob_T0246330.2		-1.77
Qrob_T0239020.2	uncharacterized LOC115994854, transcript variant X2	-1.77
Qrob_T0568460.2	protein SPIRAL1-like 1	-1.77
Qrob_T0623010.2	probable lysophospholipase BODYGUARD 3	-1.76
Qrob_T0055400.2	protein SPIRAL1-like 2	-1.76
Qrob_T0135910.2	cellulose synthase A catalytic subunit 4 [UDP-forming]	-1.76
Qrob_T0541900.2	tubulin beta-5 chain	-1.76
Qrob_T0156360.2	protein NRT1/ PTR FAMILY 4.3-like	-1.76
Qrob_T0548570.2	NADH dehydrogenase [ubiquinone] 1 beta subcomplex subunit 8, mitochondrial	-1.76
Qrob_T0216640.2	ADP-ribosylation factor 2-like, transcript variant X4	-1.76
Qrob_T0758490.2	allene oxide cyclase, chloroplastic-like	-1.76
Qrob_T0322620.2	expansin-B18-like	-1.76
Qrob_T0240910.2	2,3-bisphosphoglycerate-independent phosphoglycerate mutase-like	-1.76
Qrob_T0329210.2	histidine-containing phosphotransfer protein 1	-1.76
Qrob_T0602650.2	septum-promoting GTP-binding protein 1-like	-1.76
Qrob_T0457070.2	beta-amyrin synthase-like, transcript variant X1	-1.76
Qrob_T0438420.2	putative pectinesterase 11	-1.75
Qrob_T0070630.2		-1.75
Qrob_T0301520.2	LRR receptor-like serine/threonine-protein kinase FEI 2	-1.75
Qrob_T0096770.2	O-fucosyltransferase 31	-1.75
Qrob_T0415280.2	probable xyloglucan 6-xylosyltransferase 3	-1.75
Qrob_T0375450.2	uncharacterized LOC115977359, transcript variant X1	-1.75
Qrob_T0149110.2	ubiquitin-conjugating enzyme E2 4-like	-1.75
Qrob_T0088100.2	probable hydroxyacylglutathione hydrolase 2, chloroplastic, transcript variant X1	-1.75
Qrob_T0102040.2	protein ENHANCED DISEASE RESISTANCE 2-like, transcript variant X1	-1.74
Qrob_T0568550.2	14-3-3-like protein GF14 iota	-1.74
Qrob_T0379850.2	E2F transcription factor-like E2FE, transcript variant X1	-1.74
Qrob_T0108440.2	aquaporin TIP1-3-like	-1.74
Qrob_T0207330.2	basic form of pathogenesis-related protein 1-like	-1.74
Qrob_T0304470.2	probable cellulose synthase A catalytic subunit 3 [UDP-forming]	-1.74
Qrob_T0533850.2	beta-1,6-galactosyltransferase GALT31A	-1.74
Qrob_T0455170.2	serine carboxypeptidase-like 27	-1.74
Qrob_T0746290.2		-1.74
Qrob_T0184640.2	major allergen Pru ar 1-like	-1.74
Qrob_T0091080.2		-1.73
Qrob_T0705300.2	uncharacterized LOC115958586	-1.73
Qrob_T0199020.2	uncharacterized LOC115982599	-1.73
Qrob_T0386960.2		-1.73
Qrob_T0071710.2		-1.73
Qrob_T0650680.2	uncharacterized LOC115976569, transcript variant X1	-1.73
Qrob_T0132480.2	probable glutathione S-transferase	-1.73
Qrob_T0613620.2	indole-3-acetic acid-amido synthetase GH3.6-like	-1.72
Qrob_T0262840.2	1-aminocyclopropane-1-carboxylate oxidase 5	-1.72
Qrob_T0602100.2	aquaporin PIP2-7-like	-1.72
Qrob_T0381300.2	probable pectate lyase 12	-1.72
Qrob_T0531040.2		-1.72
Qrob_T0296830.2	GDSL esterase/lipase At5g45670-like	-1.72
Qrob_T0159420.2	crocetin glucosyltransferase, chloroplastic-like	-1.72
Qrob_T0437530.2	uncharacterized LOC115958205	-1.72
Qrob_T0602910.2	7-deoxyloganetin glucosyltransferase-like, transcript variant X1	-1.72
Qrob_T0691030.2	uncharacterized LOC115976385, transcript variant X3	-1.72
Qrob_T0289670.2	actin-like	-1.72
Qrob_T0176270.2	uncharacterized LOC115955619, transcript variant X1	-1.72
Qrob_T0096830.2	kinase-interacting protein 1-like	-1.72
Qrob_T0369940.2		-1.72
Qrob_T0332880.2	outer envelope pore protein 16-3, chloroplastic/mitochondrial	-1.72
Qrob_T0578850.2	pectinesterase-like	-1.72
Qrob_T0409260.2	proline--tRNA ligase, cytoplasmic-like	-1.72
Qrob_T0499140.2	ATP-citrate synthase alpha chain protein 2	-1.72
Qrob_T0282170.2	uncharacterized LOC115974826	-1.71
Qrob_T0090580.2	kinesin-like protein KIN-5C	-1.71
Qrob_T0182900.2	protein LATERAL ROOT PRIMORDIUM 1-like	-1.71
Qrob_T0485330.2	umecyanin-like	-1.71
Qrob_T0742370.2	probable C-terminal domain small phosphatase	-1.71
Qrob_T0457350.2	mini-chromosome maintenance complex-binding protein	-1.71
Qrob_T0187480.2	NAC domain-containing protein 83-like	-1.71
Qrob_T0201110.2	uncharacterized LOC115950588, transcript variant X3	-1.71
Qrob_T0153260.2	tripeptidyl-peptidase 2-like	-1.71
Qrob_T0093060.2	adenylate kinase 4	-1.71
Qrob_T0631340.2	LEAF RUST 10 DISEASE-RESISTANCE LOCUS RECEPTOR-LIKE PROTEIN KINASE-like 1.2	-1.7
Qrob_T0478890.2	serine carboxypeptidase-like 40	-1.7
Qrob_T0089600.2		-1.7
Qrob_T0701460.2	flowering-promoting factor 1-like protein 3	-1.7
Qrob_T0378930.2	extensin-like	-1.7
Qrob_T0342700.2	L-type lectin-domain containing receptor kinase IX.1-like, transcript variant X1	-1.7
Qrob_T0443060.2	shikimate O-hydroxycinnamoyltransferase-like	-1.7
Qrob_T0107380.2		-1.7
Qrob_T0014210.2	probable methyltransferase PMT16	-1.7
Qrob_T0199930.2	uncharacterized LOC115995238	-1.7
Qrob_T0508720.2	RING-H2 finger protein ATL38-like	-1.7
Qrob_T0492970.2	auxin-induced in root cultures protein 12-like	-1.7
Qrob_T0765510.2		-1.7
Qrob_T0473870.2	uncharacterized LOC115981648	-1.7
Qrob_T0538090.2		-1.7
Qrob_T0222790.2	uncharacterized LOC115960879	-1.69
Qrob_T0693770.2	uncharacterized LOC115972145	-1.69
Qrob_T0411870.2	uncharacterized LOC115971984	-1.69
Qrob_T0085390.2	uncharacterized LOC115991989	-1.69
Qrob_T0364190.2	receptor-like serine/threonine-protein kinase ALE2	-1.69
Qrob_T0315870.2	NDR1/HIN1-like protein 12	-1.69
Qrob_T0079190.2	50S ribosomal protein L5, chloroplastic	-1.69
Qrob_T0256130.2	NADPH-dependent aldo-keto reductase, chloroplastic-like	-1.69
Qrob_T0737930.2	G-type lectin S-receptor-like serine/threonine-protein kinase SD2-5	-1.68
Qrob_T0248580.2	formin-2	-1.68
Qrob_T0423470.2		-1.68
Qrob_T0270930.2	uncharacterized LOC115978411	-1.68
Qrob_T0172570.2	L-ascorbate oxidase homolog	-1.68
Qrob_T0246270.2	transcription factor MYB124, transcript variant X1	-1.68
Qrob_T0182870.2	protein LONG AFTER FAR-RED 3-like, transcript variant X1	-1.68
Qrob_T0397580.2	major latex allergen Hev b 5-like	-1.68
Qrob_T0352240.2	uncharacterized GPI-anchored protein At4g28100	-1.68
Qrob_T0210050.2	lanC-like protein GCL1	-1.68
Qrob_T0154320.2	probable protein phosphatase 2C 34, transcript variant X2	-1.68
Qrob_T0120860.2	cellulose synthase-like protein G3	-1.68
Qrob_T0636950.2		-1.67
Qrob_T0212010.2	acyl-coenzyme A thioesterase 9, mitochondrial-like	-1.67
Qrob_T0030180.2	F-box/LRR-repeat protein At2g40920-like	-1.67
Qrob_T0145170.2	kinesin-like protein KIN-14L	-1.67
Qrob_T0209630.2	FCS-Like Zinc finger 3	-1.67
Qrob_T0261560.2	polyadenylate-binding protein 2	-1.67
Qrob_T0154230.2	putative lipid-binding protein AIR1, transcript variant X1	-1.66
Qrob_T0087310.2	cytosolic sulfotransferase 15-like	-1.66
Qrob_T0199990.2		-1.66
Qrob_T0031940.2		-1.66
Qrob_T0641250.2	ABC transporter C family member 14-like	-1.66
Qrob_T0491400.2		-1.66
Qrob_T0386280.2	uncharacterized LOC115957489	-1.66
Qrob_T0151710.2	glutathione S-transferase PARB-like	-1.66
Qrob_T0649270.2	CEN-like protein 2	-1.66
Qrob_T0372460.2	oxalate--CoA ligase	-1.66
Qrob_T0003480.2	probable inactive purple acid phosphatase 1, transcript variant X2	-1.66
Qrob_T0175200.2	monothiol glutaredoxin-S7, chloroplastic, transcript variant X1	-1.66
Qrob_T0062620.2	zinc finger CCCH domain-containing protein 53, transcript variant X3	-1.66
Qrob_T0401680.2	zinc transporter 1-like, transcript variant X2	-1.65
Qrob_T0416010.2	uncharacterized LOC115981799	-1.65
Qrob_T0532880.2	probable galacturonosyltransferase-like 1	-1.65
Qrob_T0215010.2	probable glucan 1,3-beta-glucosidase A	-1.65
Qrob_T0477230.2	gamma carbonic anhydrase 1, mitochondrial-like, transcript variant X2	-1.65
Qrob_T0173380.2	endochitinase-like, transcript variant X2	-1.65
Qrob_T0413000.2	histone H4	-1.65
Qrob_T0053150.2	zinc finger CCCH domain-containing protein 62	-1.65
Qrob_T0353980.2		-1.65
Qrob_T0177080.2	NADH dehydrogenase [ubiquinone] iron-sulfur protein 6, mitochondrial	-1.65
Qrob_T0280310.2	uncharacterized LOC115990409	-1.64
Qrob_T0053750.2	patatin-like protein 1	-1.64
Qrob_T0199530.2	transcription factor MYB114-like	-1.64
Qrob_T0216160.2	major strawberry allergen Fra a 1.04-like	-1.64
Qrob_T0289650.2	uncharacterized LOC115953724	-1.64
Qrob_T0325330.2	uncharacterized LOC115963625	-1.64
Qrob_T0434360.2		-1.64
Qrob_T0136650.2	uncharacterized LOC115988070	-1.64
Qrob_T0540730.2	aspartyl protease family protein At5g10770-like	-1.64
Qrob_T0369840.2		-1.64
Qrob_T0264490.2	CTP synthase-like, transcript variant X1	-1.64
Qrob_T0418880.2		-1.63
Qrob_T0307980.2	uncharacterized LOC115980434	-1.63
Qrob_T0063370.2		-1.63
Qrob_T0682800.2	probable pectate lyase 5	-1.63
Qrob_T0122740.2	short-chain dehydrogenase/reductase 2b-like, transcript variant X3	-1.63
Qrob_T0343710.2		-1.63
Qrob_T0265800.2	probable LRR receptor-like serine/threonine-protein kinase At1g67720, transcript variant X1	-1.63
Qrob_T0747980.2	prefoldin subunit 1	-1.63
Qrob_T0557610.2	glutamate dehydrogenase 2-like, transcript variant X1	-1.63
Qrob_T0731010.2	transmembrane 9 superfamily member 2-like	-1.63
Qrob_T0415600.2		-1.62
Qrob_T0726370.2	serine carboxypeptidase-like 40	-1.62
Qrob_T0008210.2	peroxidase A2-like	-1.62
Qrob_T0422890.2	signal recognition particle 9 kDa protein-like	-1.62
Qrob_T0731190.2	lactoylglutathione lyase, transcript variant X3	-1.62
Qrob_T0214980.2	2,3-bisphosphoglycerate-dependent phosphoglycerate mutase, transcript variant X3	-1.62
Qrob_T0747270.2	protein SUPPRESSOR OF K(+) TRANSPORT GROWTH DEFECT 1	-1.62
Qrob_T0149590.2	tyrosine/DOPA decarboxylase 2-like	-1.61
Qrob_T0313720.2	putative calcium-transporting ATPase 13, plasma membrane-type	-1.61
Qrob_T0188960.2	amino acid permease 4, transcript variant X1	-1.61
Qrob_T0016150.2	disease resistance protein RML1B-like, transcript variant X11	-1.61
Qrob_T0017030.2	extracellular ribonuclease LE-like	-1.61
Qrob_T0684410.2	lupeol synthase-like, transcript variant X2	-1.61
Qrob_T0696080.2		-1.61
Qrob_T0096810.2	uncharacterized protein At4g38062, transcript variant X2	-1.61
Qrob_T0758210.2	serine hydroxymethyltransferase, mitochondrial-like	-1.61
Qrob_T0243920.2	exocyst complex component EXO70B1-like	-1.6
Qrob_T0753470.2		-1.6
Qrob_T0358610.2	enoyl-[acyl-carrier-protein] reductase [NADH] 1, chloroplastic-like	-1.6
Qrob_T0619040.2	casparian strip membrane protein 3-like	-1.6
Qrob_T0472220.2	mechanosensitive ion channel protein 10	-1.6
Qrob_T0610030.2	probable polyamine transporter At1g31830, transcript variant X1	-1.6
Qrob_T0216020.2	universal stress protein PHOS34-like	-1.6
Qrob_T0474060.2	26S proteasome regulatory subunit 6A homolog	-1.6
Qrob_T0464430.2	uncharacterized LOC115959295	-1.59
Qrob_T0356990.2		-1.59
Qrob_T0660350.2	transcription factor MYB8-like	-1.59
Qrob_T0444570.2	DNA repair protein RAD51 homolog	-1.59
Qrob_T0742340.2	BES1/BZR1 homolog protein 4-like, transcript variant X3	-1.59
Qrob_T0033440.2	K(+) efflux antiporter 2, chloroplastic-like	-1.59
Qrob_T0027010.2	uncharacterized protein At5g50100, chloroplastic, transcript variant X3	-1.58
Qrob_T0238400.2	UPF0548 protein At2g17695-like, transcript variant X2	-1.58
Qrob_T0032980.2	gibberellin-regulated protein 14-like	-1.58
Qrob_T0030020.2	uncharacterized LOC115978003	-1.58
Qrob_T0697020.2	transcription factor UPBEAT1	-1.58
Qrob_T0112250.2	probable carotenoid cleavage dioxygenase 4, chloroplastic	-1.58
Qrob_T0246000.2	serine carboxypeptidase-like 18	-1.58
Qrob_T0361380.2	dynamin-related protein 1E-like	-1.58
Qrob_T0578870.2	pectinesterase-like	-1.58
Qrob_T0388130.2	uncharacterized LOC115969554	-1.58
Qrob_T0473520.2		-1.58
Qrob_T0032280.2	uncharacterized LOC115965336, transcript variant X2	-1.58
Qrob_T0015920.2	peptide-N(4)-(N-acetyl-beta-glucosaminyl)asparagine amidase	-1.58
Qrob_T0398880.2	mitogen-activated protein kinase homolog MMK2	-1.58
Qrob_T0642020.2	40S ribosomal protein S6-like	-1.58
Qrob_T0099230.2	probable xyloglucan endotransglucosylase/hydrolase protein 6	-1.57
Qrob_T0665060.2	uncharacterized LOC115995296	-1.57
Qrob_T0069980.2	protein EDS1-like	-1.57
Qrob_T0672090.2	late embryogenesis abundant protein At1g64065-like	-1.57
Qrob_T0631680.2	protein CELLULOSE SYNTHASE INTERACTIVE 1, transcript variant X2	-1.57
Qrob_T0310970.2		-1.57
Qrob_T0041100.2	uncharacterized LOC115982809	-1.57
Qrob_T0125130.2	glucan endo-1,3-beta-glucosidase, basic isoform-like	-1.57
Qrob_T0005060.2	protein DJ-1 homolog D	-1.57
Qrob_T0112730.2	BAG family molecular chaperone regulator 7	-1.57
Qrob_T0261450.2	probable inactive receptor kinase At5g67200	-1.57
Qrob_T0692030.2	E3 ubiquitin-protein ligase RGLG5-like, transcript variant X3	-1.57
Qrob_T0318900.2	uncharacterized LOC115979266, transcript variant X2	-1.57
Qrob_T0680570.2	probable galacturonosyltransferase 12	-1.56
Qrob_T0229610.2	zinc transporter 1-like	-1.56
Qrob_T0050210.2	uncharacterized LOC115965782	-1.56
Qrob_T0014400.2	ethylene-responsive transcription factor ERF027-like	-1.55
Qrob_T0657660.2	uncharacterized LOC115954656, transcript variant X1	-1.55
Qrob_T0264600.2	aquaporin TIP4-1-like	-1.55
Qrob_T0184700.2	major allergen Pru ar 1-like	-1.55
Qrob_T0182060.2		-1.55
Qrob_T0190730.2	putative hydrolase C777.06c, transcript variant X1	-1.55
Qrob_T0124920.2	nudix hydrolase 9, transcript variant X2	-1.55
Qrob_T0407220.2	thaumatin-like protein 1	-1.55
Qrob_T0391810.2	14-3-3 protein 7	-1.55
Qrob_T0219640.2	proline-rich receptor-like protein kinase PERK1	-1.55
Qrob_T0499690.2	tropinone reductase homolog, transcript variant X2	-1.54
Qrob_T0503490.2	ferric reduction oxidase 7, chloroplastic-like, transcript variant X2	-1.54
Qrob_T0090440.2	uncharacterized LOC115953422	-1.54
Qrob_T0222250.2		-1.54
Qrob_T0381260.2	leucine-rich repeat receptor-like serine/threonine/tyrosine-protein kinase SOBIR1	-1.54
Qrob_T0468780.2		-1.54
Qrob_T0714270.2	uncharacterized LOC115951283	-1.54
Qrob_T0578690.2	uncharacterized LOC115989020	-1.54
Qrob_T0742450.2	uncharacterized LOC115959314, transcript variant X2	-1.54
Qrob_T0542860.2	plastidial pyruvate kinase 2	-1.54
Qrob_T0690090.2	plasmodesmata-located protein 2-like, transcript variant X4	-1.54
Qrob_T0454980.2	elongation factor 1-alpha-like	-1.54
Qrob_T0571070.2	60S ribosomal protein L10a-like	-1.54
Qrob_T0160300.2	uncharacterized LOC115955020	-1.53
Qrob_T0280050.2	expansin-A8-like	-1.53
Qrob_T0026190.2	uncharacterized serine-rich protein C215.13, transcript variant X3	-1.53
Qrob_T0300340.2	ABC transporter G family member 25	-1.53
Qrob_T0094620.2		-1.53
Qrob_T0705120.2	RNA-dependent RNA polymerase 1-like	-1.53
Qrob_T0413680.2		-1.53
Qrob_T0317980.2	xanthotoxin 5-hydroxylase CYP82C4-like	-1.52
Qrob_T0430150.2	G-type lectin S-receptor-like serine/threonine-protein kinase LECRK4	-1.52
Qrob_T0707370.2		-1.52
Qrob_T0036270.2		-1.52
Qrob_T0693400.2	xyloglucan endotransglucosylase/hydrolase 2-like	-1.52
Qrob_T0459680.2	protein trichome birefringence-like 19	-1.52
Qrob_T0743730.2	UDP-glycosyltransferase 90A1-like	-1.52
Qrob_T0251910.2	G2/mitotic-specific cyclin-2-like	-1.52
Qrob_T0240780.2	protein LURP-one-related 5-like	-1.52
Qrob_T0642200.2	indole-3-acetic acid-amido synthetase GH3.17-like	-1.52
Qrob_T0131410.2	receptor protein kinase TMK1-like	-1.52
Qrob_T0187320.2	omega-hydroxypalmitate O-feruloyl transferase	-1.52
Qrob_T0651930.2	RING-H2 finger protein ATL52-like, transcript variant X2	-1.52
Qrob_T0247500.2	histidine kinase 4, transcript variant X2	-1.52
Qrob_T0515770.2	uncharacterized protein At5g65660	-1.52
Qrob_T0417380.2	60S ribosomal protein L34	-1.52
Qrob_T0108320.2	40S ribosomal protein S15a-1	-1.52
Qrob_T0350360.2		-1.51
Qrob_T0614850.2		-1.51
Qrob_T0111390.2	auxin-responsive protein IAA32-like	-1.51
Qrob_T0520420.2	aspartic proteinase PCS1	-1.51
Qrob_T0505050.2	basic leucine zipper 61-like	-1.51
Qrob_T0570930.2		-1.51
Qrob_T0386220.2	uncharacterized LOC115955542	-1.51
Qrob_T0713150.2	probable polygalacturonase, transcript variant X1	-1.51
Qrob_T0720310.2		-1.51
Qrob_T0434330.2	uncharacterized LOC115957611	-1.51
Qrob_T0390620.2	uncharacterized LOC115975088, transcript variant X2	-1.51
Qrob_T0162980.2	uncharacterized LOC115993631	-1.5
Qrob_T0566920.2	kinesin-like protein KIN-4C	-1.5
Qrob_T0531950.2	uncharacterized LOC115966259	-1.5
Qrob_T0152760.2	silicon efflux transporter LSI2-like, transcript variant X1	-1.5
Qrob_T0481550.2	transcription factor BIM1	-1.5
Qrob_T0698150.2	early nodulin-93-like	-1.5
Qrob_T0269270.2	beta-glucosidase 12-like, transcript variant X2	-1.5
Qrob_T0494370.2	beta-amyrin synthase-like, transcript variant X1	-1.5
Qrob_T0222240.2	ferric reduction oxidase 7, chloroplastic-like	-1.49
Qrob_T0064140.2	structural maintenance of chromosomes protein 4	-1.49
Qrob_T0235600.2	ankyrin-3	-1.49
Qrob_T0367900.2	fatty acid hydroperoxide lyase, chloroplastic	-1.49
Qrob_T0266400.2	pyrroline-5-carboxylate reductase	-1.49
Qrob_T0661750.2		-1.49
Qrob_T0035940.2	acylamino-acid-releasing enzyme-like, transcript variant X1	-1.49
Qrob_T0142070.2	protein trichome birefringence, transcript variant X1	-1.49
Qrob_T0125530.2	protein CASPARIAN STRIP INTEGRITY FACTOR 1-like, transcript variant X1	-1.49
Qrob_T0464580.2	60S ribosomal protein L38-like	-1.49
Qrob_T0366630.2	protein LHY-like, transcript variant X5	-1.49
Qrob_T0264950.2	signal peptide peptidase, transcript variant X1	-1.49
Qrob_T0278940.2	TMV resistance protein N-like, transcript variant X8	-1.48
Qrob_T0689750.2	jacalin-related lectin 3-like	-1.48
Qrob_T0041160.2		-1.48
Qrob_T0577330.2	WAT1-related protein At4g30420-like	-1.48
Qrob_T0163030.2	uncharacterized LOC115993801	-1.48
Qrob_T0165570.2		-1.48
Qrob_T0674340.2	zinc finger protein CONSTANS-LIKE 1-like	-1.48
Qrob_T0619560.2	filament-like plant protein 4	-1.48
Qrob_T0626480.2	uncharacterized LOC115957766	-1.48
Qrob_T0033550.2	protein O-glucosyltransferase 1-like, transcript variant X2	-1.48
Qrob_T0503420.2	protein ASPARTIC PROTEASE IN GUARD CELL 1	-1.48
Qrob_T0114260.2	protein EXORDIUM-like 2	-1.48
Qrob_T0329720.2		-1.47
Qrob_T0735180.2	UDP-glycosyltransferase 74E2-like	-1.47
Qrob_T0530100.2	serine/threonine-protein kinase-like protein CCR1	-1.47
Qrob_T0426920.2	cytochrome P450 CYP736A12-like	-1.47
Qrob_T0081130.2	peroxidase 45-like, transcript variant X2	-1.47
Qrob_T0232430.2	sucrose transport protein SUC2-like	-1.47
Qrob_T0395570.2	glucan endo-1,3-beta-glucosidase 13-like	-1.47
Qrob_T0466530.2	vesicle-associated protein 4-2-like	-1.47
Qrob_T0516410.2	afadin- and alpha-actinin-binding protein, transcript variant X2	-1.47
Qrob_T0297790.2	alpha-L-fucosidase 2-like	-1.47
Qrob_T0404940.2	multicopper oxidase LPR2-like	-1.47
Qrob_T0705490.2	RGG repeats nuclear RNA binding protein A-like	-1.47
Qrob_T0256300.2	protein RETICULATA, chloroplastic, transcript variant X1	-1.47
Qrob_T0279060.2	probable RNA helicase SDE3, transcript variant X1	-1.47
Qrob_T0723570.2	cytokinin dehydrogenase 3-like	-1.46
Qrob_T0008130.2		-1.46
Qrob_T0321590.2	probable trehalose-phosphate phosphatase 2	-1.46
Qrob_T0452200.2	gibberellin-regulated protein 6, transcript variant X2	-1.46
Qrob_T0546940.2	bidirectional sugar transporter SWEET17-like	-1.46
Qrob_T0279190.2	uncharacterized GPI-anchored protein At5g19250-like	-1.46
Qrob_T0173040.2		-1.46
Qrob_T0661740.2		-1.46
Qrob_T0204910.2		-1.46
Qrob_T0569800.2	ABC transporter B family member 1	-1.46
Qrob_T0279760.2	callose synthase 3, transcript variant X3	-1.46
Qrob_T0317110.2	pyruvate kinase 1, cytosolic, transcript variant X1	-1.46
Qrob_T0136850.2	glutamate--glyoxylate aminotransferase 2	-1.46
Qrob_T0149550.2	tyrosine/DOPA decarboxylase 2-like	-1.45
Qrob_T0645090.2	probable aspartyl protease At4g16563	-1.45
Qrob_T0474610.2	uncharacterized LOC115992184	-1.45
Qrob_T0614500.2	uncharacterized LOC115986419	-1.45
Qrob_T0617300.2	chloroplast envelope quinone oxidoreductase homolog	-1.45
Qrob_T0074210.2	uncharacterized LOC115956085	-1.45
Qrob_T0007960.2		-1.45
Qrob_T0250400.2	heat shock cognate protein 80	-1.45
Qrob_T0564880.2	cyclin-A2-2-like, transcript variant X4	-1.45
Qrob_T0575610.2	protein PPLZ02-like	-1.45
Qrob_T0279100.2	non-specific lipid-transfer protein-like protein At2g13820	-1.45
Qrob_T0629490.2	40S ribosomal protein S21-2	-1.45
Qrob_T0563610.2	mitochondrial-processing peptidase subunit alpha-like	-1.45
Qrob_T0310730.2		-1.45
Qrob_T0464520.2	40S ribosomal protein S20-1-like	-1.45
Qrob_T0655510.2	cytochrome b-c1 complex subunit 8	-1.45
Qrob_T0237620.2		-1.44
Qrob_T0383670.2	inactive protein RESTRICTED TEV MOVEMENT 2-like	-1.44
Qrob_T0371950.2	ethylene-responsive transcription factor ERN1	-1.44
Qrob_T0033980.2	rop guanine nucleotide exchange factor 2	-1.44
Qrob_T0056570.2	ankyrin repeat-containing protein ITN1-like, transcript variant X2	-1.44
Qrob_T0010330.2	probable protein ABIL5, transcript variant X1	-1.44
Qrob_T0550350.2	uncharacterized LOC115989766, transcript variant X1	-1.44
Qrob_T0761620.2	3-ketoacyl-CoA synthase 11-like	-1.44
Qrob_T0340950.2	COP1-interacting protein 7, transcript variant X2	-1.44
Qrob_T0732670.2	protein ENHANCED DISEASE RESISTANCE 2-like, transcript variant X5	-1.44
Qrob_T0689420.2		-1.44
Qrob_T0720450.2		-1.44
Qrob_T0330220.2	cold-regulated 413 inner membrane protein 1, chloroplastic	-1.44
Qrob_T0641120.2	actin-related protein 2/3 complex subunit 1A-like, transcript variant X1	-1.44
Qrob_T0096860.2	nucleobase-ascorbate transporter 11	-1.44
Qrob_T0092540.2	mitochondrial import inner membrane translocase subunit Tim9	-1.44
Qrob_T0398960.2	putative UDP-rhamnose:rhamnosyltransferase 1	-1.43
Qrob_T0441170.2	probable alkaline/neutral invertase F	-1.43
Qrob_T0101250.2	L-ascorbate oxidase-like, transcript variant X1	-1.43
Qrob_T0124230.2	bark storage protein A-like	-1.43
Qrob_T0247980.2	WUSCHEL-related homeobox 11-like, transcript variant X1	-1.43
Qrob_T0501330.2	ubiquitin domain-containing protein 1-like	-1.43
Qrob_T0037250.2	oleoyl-acyl carrier protein thioesterase 1, chloroplastic-like	-1.43
Qrob_T0142740.2	expansin-A1-like	-1.43
Qrob_T0198830.2	uncharacterized LOC115982415	-1.43
Qrob_T0130970.2	reticulon-like protein B12, transcript variant X1	-1.43
Qrob_T0438490.2	probable pinoresinol-lariciresinol reductase 3	-1.43
Qrob_T0440970.2	peptidyl-prolyl cis-trans isomerase	-1.43
Qrob_T0265610.2	40S ribosomal protein S5	-1.43
Qrob_T0224450.2		-1.42
Qrob_T0329160.2		-1.42
Qrob_T0585140.2	uncharacterized LOC115955313	-1.42
Qrob_T0004560.2	OVARIAN TUMOR DOMAIN-containing deubiquitinating enzyme 12-like, transcript variant X3	-1.42
Qrob_T0019870.2		-1.42
Qrob_T0264740.2	L-gulonolactone oxidase 3	-1.42
Qrob_T0517720.2	glycine dehydrogenase (decarboxylating), mitochondrial-like	-1.42
Qrob_T0515230.2	probable pectinesterase 53	-1.42
Qrob_T0053760.2	patatin-like protein 1	-1.42
Qrob_T0087720.2	cationic amino acid transporter 6, chloroplastic-like	-1.42
Qrob_T0567940.2		-1.42
Qrob_T0102450.2	cystathionine gamma-synthase 1, chloroplastic	-1.42
Qrob_T0099190.2	cytochrome c oxidase subunit 6a, mitochondrial	-1.42
Qrob_T0362290.2		-1.42
Qrob_T0502880.2	beta-fructofuranosidase, insoluble isoenzyme CWINV1-like	-1.41
Qrob_T0365430.2	transcription factor PRE6-like	-1.41
Qrob_T0097090.2		-1.41
Qrob_T0086800.2	heavy metal-associated isoprenylated plant protein 21, transcript variant X2	-1.41
Qrob_T0270610.2	10 kDa chaperonin, mitochondrial-like	-1.41
Qrob_T0078840.2	subtilisin-like protease SBT2.6	-1.41
Qrob_T0625190.2	putative leucine-rich repeat receptor-like serine/threonine-protein kinase At2g19230	-1.41
Qrob_T0507440.2	cycloartenol-C-24-methyltransferase-like, transcript variant X1	-1.41
Qrob_T0187690.2		-1.41
Qrob_T0492040.2	uncharacterized LOC115988937	-1.41
Qrob_T0309310.2		-1.41
Qrob_T0186550.2	uncharacterized LOC115960844	-1.41
Qrob_T0311990.2		-1.41
Qrob_T0020700.2		-1.4
Qrob_T0229310.2	ABC transporter G family member 21, transcript variant X1	-1.4
Qrob_T0147450.2	cyclic nucleotide-gated ion channel 1-like	-1.4
Qrob_T0060690.2	probable methyltransferase PMT19	-1.4
Qrob_T0208710.2	bifunctional 3-dehydroquinate dehydratase/shikimate dehydrogenase, chloroplastic-like	-1.4
Qrob_T0713840.2	actin-related protein 2/3 complex subunit 3	-1.4
Qrob_T0509610.2	dual specificity protein phosphatase 12-like	-1.4
Qrob_T0123820.2	inositol-tetrakisphosphate 1-kinase 1-like, transcript variant X1	-1.4
Qrob_T0417880.2	uncharacterized LOC115994299, transcript variant X2	-1.4
Qrob_T0075100.2		-1.4
Qrob_T0319390.2		-1.4
Qrob_T0070890.2	leucine aminopeptidase 1-like	-1.4
Qrob_T0097750.2		-1.39
Qrob_T0634480.2		-1.39
Qrob_T0125170.2		-1.39
Qrob_T0088560.2	glucomannan 4-beta-mannosyltransferase 9	-1.39
Qrob_T0304830.2	uncharacterized LOC115974772	-1.39
Qrob_T0605380.2	fasciclin-like arabinogalactan protein 13	-1.39
Qrob_T0737170.2	uncharacterized protein At5g01610-like	-1.39
Qrob_T0069960.2	protein EDS1L-like	-1.39
Qrob_T0479410.2	UDP-glycosyltransferase 82A1-like	-1.39
Qrob_T0055500.2	ninja-family protein AFP3-like, transcript variant X1	-1.39
Qrob_T0222260.2	ferric reduction oxidase 7, chloroplastic-like	-1.39
Qrob_T0471210.2	protein DETOXIFICATION 16-like	-1.39
Qrob_T0232110.2		-1.39
Qrob_T0585430.2	FCS-Like Zinc finger 13	-1.39
Qrob_T0619520.2	uncharacterized LOC115974463	-1.39
Qrob_T0705820.2		-1.39
Qrob_T0013090.2		-1.39
Qrob_T0090540.2		-1.39
Qrob_T0240890.2	protein argonaute 2-like	-1.39
Qrob_T0002710.2	26S proteasome non-ATPase regulatory subunit 10-like	-1.39
Qrob_T0071320.2	VAMP-like protein YKT61	-1.39
Qrob_T0102710.2	uncharacterized LOC115979746	-1.38
Qrob_T0736550.2	probable LL-diaminopimelate aminotransferase, chloroplastic	-1.38
Qrob_T0310940.2		-1.38
Qrob_T0187390.2	glutaredoxin-C1-like	-1.38
Qrob_T0661910.2	GDSL esterase/lipase At3g26430-like	-1.38
Qrob_T0367160.2	uncharacterized LOC115988117, transcript variant X1	-1.38
Qrob_T0077340.2	uncharacterized LOC115962822, transcript variant X1	-1.38
Qrob_T0490530.2	protein SIEVE ELEMENT OCCLUSION B-like	-1.38
Qrob_T0236840.2	glucan endo-1,3-beta-glucosidase 9	-1.38
Qrob_T0371160.2	protein SINE1	-1.38
Qrob_T0696870.2	condensin-2 complex subunit D3	-1.38
Qrob_T0184750.2	major allergen Pru ar 1-like	-1.38
Qrob_T0237450.2	L-ascorbate oxidase homolog	-1.38
Qrob_T0289620.2	probable plastid-lipid-associated protein 13, chloroplastic, transcript variant X1	-1.38
Qrob_T0409080.2	vacuolar-sorting receptor 6	-1.38
Qrob_T0280520.2	transcription factor bHLH104-like, transcript variant X1	-1.38
Qrob_T0357030.2	uncharacterized LOC115990141	-1.37
Qrob_T0031890.2	polygalacturonase-like	-1.37
Qrob_T0533860.2	ankyrin repeat and KH domain-containing protein 1-like, transcript variant X3	-1.37
Qrob_T0198110.2	serine carboxypeptidase-like 35	-1.37
Qrob_T0718350.2	senescence-associated carboxylesterase 101-like	-1.37
Qrob_T0733120.2	transcription factor bHLH93-like	-1.37
Qrob_T0288410.2	dicer-like protein 4, transcript variant X3	-1.37
Qrob_T0676300.2	endoplasmin homolog	-1.37
Qrob_T0032270.2	uncharacterized LOC115965336, transcript variant X2	-1.37
Qrob_T0475360.2	serine/threonine protein phosphatase 2A 57 kDa regulatory subunit B' kappa isoform-like	-1.37
Qrob_T0670300.2	glutathione S-transferase U10-like	-1.37
Qrob_T0357130.2	ankyrin repeat-containing protein At5g02620-like	-1.36
Qrob_T0006190.2	protein trichome birefringence-like 36	-1.36
Qrob_T0305250.2	GDSL esterase/lipase At1g09390-like	-1.36
Qrob_T0699440.2	probable inactive receptor kinase At4g23740, transcript variant X2	-1.36
Qrob_T0629140.2	monocopper oxidase-like protein SKU5	-1.36
Qrob_T0002950.2	alpha-1,4 glucan phosphorylase L-2 isozyme, chloroplastic/amyloplastic-like, transcript variant X2	-1.36
Qrob_T0444920.2	60S ribosomal protein L35a-3, transcript variant X2	-1.36
Qrob_T0363000.2	uncharacterized LOC115976911	-1.36
Qrob_T0623080.2	protein BRANCHLESS TRICHOME	-1.35
Qrob_T0699100.2	cation/H(+) antiporter 18-like, transcript variant X2	-1.35
Qrob_T0757750.2	uncharacterized LOC115954245	-1.35
Qrob_T0598130.2	uncharacterized LOC115987660	-1.35
Qrob_T0064710.2	microtubule-associated protein 70-5	-1.35
Qrob_T0570740.2	late embryogenesis abundant protein D-29-like	-1.35
Qrob_T0151220.2	protein STICHEL-like 2, transcript variant X4	-1.35
Qrob_T0292090.2	B-box zinc finger protein 19-like, transcript variant X6	-1.35
Qrob_T0132220.2	tubulin alpha chain-like	-1.35
Qrob_T0196740.2	probable RNA helicase SDE3, transcript variant X1	-1.35
Qrob_T0075680.2	costars family protein	-1.35
Qrob_T0605470.2	ABC transporter G family member 6	-1.35
Qrob_T0614870.2	serine/threonine-protein kinase STY13-like	-1.35
Qrob_T0643760.2	protein ALUMINUM SENSITIVE 3	-1.35
Qrob_T0374990.2	molybdate-anion transporter-like	-1.35
Qrob_T0489050.2	calmodulin-like protein 11	-1.35
Qrob_T0696770.2	uncharacterized LOC115995391	-1.35
Qrob_T0350340.2	isoamylase 1, chloroplastic, transcript variant X3	-1.35
Qrob_T0497670.2	probable leucine-rich repeat receptor-like protein kinase At5g63930	-1.35
Qrob_T0670830.2	receptor-like serine/threonine-protein kinase At3g01300	-1.35
Qrob_T0619530.2	auxin response factor 5	-1.35
Qrob_T0264880.2	transcription factor MYB3R-1-like, transcript variant X2	-1.35
Qrob_T0712900.2		-1.34
Qrob_T0178290.2	cytochrome P450 78A9-like	-1.34
Qrob_T0283050.2	aspartic proteinase Asp1-like	-1.34
Qrob_T0413160.2	short-chain dehydrogenase reductase 3b-like	-1.34
Qrob_T0640640.2	laccase-11-like	-1.34
Qrob_T0451560.2	uncharacterized LOC115962836	-1.34
Qrob_T0721840.2	phosphatidylinositol 4-kinase gamma 4-like	-1.34
Qrob_T0714330.2	cytochrome P450 714A1-like	-1.34
Qrob_T0103840.2	zinc transporter 1-like	-1.34
Qrob_T0234700.2	annexin-like protein RJ4, transcript variant X1	-1.34
Qrob_T0309550.2	probable cyclic nucleotide-gated ion channel 20, chloroplastic, transcript variant X4	-1.34
Qrob_T0331720.2		-1.34
Qrob_T0688630.2	flavin-containing monooxygenase FMO GS-OX-like 9	-1.34
Qrob_T0476850.2		-1.34
Qrob_T0466420.2	diacylglycerol kinase 5, transcript variant X1	-1.34
Qrob_T0633010.2	uncharacterized LOC115950786	-1.34
Qrob_T0004140.2	SNF2 domain-containing protein CLASSY 1-like, transcript variant X2	-1.34
Qrob_T0056910.2	non-functional NADPH-dependent codeinone reductase 2-like	-1.33
Qrob_T0261440.2		-1.33
Qrob_T0173130.2		-1.33
Qrob_T0657140.2	expansin-A6-like	-1.33
Qrob_T0527210.2	30S ribosomal protein S16-2, chloroplastic/mitochondrial-like	-1.33
Qrob_T0564250.2		-1.33
Qrob_T0392880.2		-1.33
Qrob_T0320040.2	late embryogenesis abundant protein At1g64065-like	-1.33
Qrob_T0558980.2	NADH dehydrogenase [ubiquinone] iron-sulfur protein 5-B	-1.33
Qrob_T0457750.2		-1.33
Qrob_T0718120.2	ultraviolet-B receptor UVR8	-1.33
Qrob_T0131490.2		-1.33
Qrob_T0202190.2	probable aldo-keto reductase 2	-1.33
Qrob_T0765770.2	calmodulin-like protein 3	-1.32
Qrob_T0341280.2		-1.32
Qrob_T0631690.2	aspartic proteinase-like protein 1	-1.32
Qrob_T0196360.2	acyl transferase 4-like	-1.32
Qrob_T0467740.2		-1.32
Qrob_T0540180.2	TATA-binding protein-associated factor 2N-like	-1.32
Qrob_T0237610.2	dirigent protein 1-like	-1.32
Qrob_T0060000.2	kinesin-like protein KIN-4A, transcript variant X3	-1.32
Qrob_T0330270.2	phytochrome E, transcript variant X3	-1.32
Qrob_T0089990.2	probable protein phosphatase 2C 60, transcript variant X2	-1.32
Qrob_T0690980.2	translocon-associated protein subunit beta	-1.32
Qrob_T0018220.2	uncharacterized LOC115964183, transcript variant X2	-1.31
Qrob_T0578930.2	cyclin-A2-3-like, transcript variant X1	-1.31
Qrob_T0231270.2	biotin carboxyl carrier protein of acetyl-CoA carboxylase 2, chloroplastic	-1.31
Qrob_T0177460.2	probable inactive patatin-like protein 9	-1.31
Qrob_T0287670.2	ABC transporter I family member 20	-1.31
Qrob_T0523920.2	myosin-2, transcript variant X4	-1.31
Qrob_T0601550.2		-1.31
Qrob_T0026400.2	glutathione S-transferase-like	-1.31
Qrob_T0093100.2		-1.3
Qrob_T0236700.2	uncharacterized acetyltransferase At3g50280	-1.3
Qrob_T0610270.2	acetylserotonin O-methyltransferase-like	-1.3
Qrob_T0261160.2		-1.3
Qrob_T0596240.2	basic leucine zipper 61	-1.3
Qrob_T0184680.2	major allergen Pru ar 1-like	-1.3
Qrob_T0149170.2	cytochrome P450 86A22	-1.3
Qrob_T0124910.2	ankyrin repeat-containing protein At5g02620-like, transcript variant X4	-1.3
Qrob_T0138930.2		-1.3
Qrob_T0375660.2	uncharacterized LOC115960968	-1.3
Qrob_T0178990.2	kinesin-like protein KIN-14S, transcript variant X2	-1.3
Qrob_T0067000.2	glucan endo-1,3-beta-glucosidase 3-like, transcript variant X1	-1.3
Qrob_T0151120.2	alpha/beta hydrolase domain-containing protein 17B-like	-1.3
Qrob_T0072900.2	diacylglycerol kinase 5-like, transcript variant X2	-1.3
Qrob_T0558170.2	vacuolar-processing enzyme-like	-1.3
Qrob_T0472300.2		-1.29
Qrob_T0653290.2	uncharacterized LOC115977914	-1.29
Qrob_T0103090.2	delta(24)-sterol reductase, transcript variant X2	-1.29
Qrob_T0243480.2		-1.29
Qrob_T0285580.2	cell division cycle 20.2, cofactor of APC complex-like, transcript variant X2	-1.29
Qrob_T0369500.2	uncharacterized LOC115960447	-1.29
Qrob_T0085440.2	pyruvate kinase, cytosolic isozyme	-1.29
Qrob_T0570470.2	CRAL-TRIO domain-containing protein C23B6.04c, transcript variant X3	-1.29
Qrob_T0742530.2	preprotein translocase subunit SECE1	-1.29
Qrob_T0504250.2	bifunctional L-3-cyanoalanine synthase/cysteine synthase 1, mitochondrial	-1.29
Qrob_T0430430.2	U-box domain-containing protein 26-like	-1.29
Qrob_T0186370.2	probable L-ascorbate peroxidase 6, chloroplastic/mitochondrial, transcript variant X1	-1.29
Qrob_T0556060.2	non-lysosomal glucosylceramidase-like, transcript variant X3	-1.29
Qrob_T0567250.2	probable inactive receptor kinase At1g27190	-1.29
Qrob_T0204690.2	T-complex protein 1 subunit beta	-1.29
Qrob_T0448040.2	serine acetyltransferase 1, chloroplastic-like	-1.29
Qrob_T0342200.2		-1.28
Qrob_T0010150.2	transcription factor MYB3R-4-like, transcript variant X2	-1.28
Qrob_T0274410.2	protein phosphatase 2C 51-like	-1.28
Qrob_T0451550.2		-1.28
Qrob_T0298050.2	protein kinase PVPK-1-like, transcript variant X3	-1.28
Qrob_T0159870.2	probable receptor-like protein kinase At1g30570	-1.28
Qrob_T0689790.2	jacalin-related lectin 3-like, transcript variant X7	-1.28
Qrob_T0705650.2	uncharacterized protein C594.04c	-1.28
Qrob_T0206980.2		-1.28
Qrob_T0349690.2	probable inactive leucine-rich repeat receptor-like protein kinase At3g03770	-1.28
Qrob_T0252850.2	basic leucine zipper 9	-1.28
Qrob_T0440150.2	villin-2, transcript variant X2	-1.28
Qrob_T0596860.2	ethylene-responsive transcription factor RAP2-4-like	-1.28
Qrob_T0446530.2	epoxide hydrolase A-like	-1.28
Qrob_T0598500.2		-1.28
Qrob_T0405360.2	cytochrome P450 71A1-like	-1.27
Qrob_T0457650.2	uncharacterized LOC115957617	-1.27
Qrob_T0194920.2	uncharacterized LOC115987704	-1.27
Qrob_T0011750.2	uncharacterized LOC115964135	-1.27
Qrob_T0422170.2	protein SODIUM POTASSIUM ROOT DEFECTIVE 2	-1.27
Qrob_T0004060.2	LOB domain-containing protein 12-like	-1.27
Qrob_T0641280.2		-1.27
Qrob_T0349720.2	probable inactive chitinase-like protein LaCIC	-1.27
Qrob_T0659740.2	receptor protein kinase-like protein ZAR1	-1.27
Qrob_T0579970.2		-1.27
Qrob_T0685920.2		-1.27
Qrob_T0542060.2	lachrymatory-factor synthase-like	-1.27
Qrob_T0361370.2	haloacid dehalogenase-like hydrolase domain-containing protein Sgpp	-1.27
Qrob_T0442700.2	60S acidic ribosomal protein P2B-like, transcript variant X2	-1.27
Qrob_T0070020.2		-1.26
Qrob_T0201290.2	glycerol-3-phosphate acyltransferase 5-like	-1.26
Qrob_T0035840.2	auxin-responsive protein IAA14-like	-1.26
Qrob_T0685110.2		-1.26
Qrob_T0131730.2	uncharacterized LOC115957725, transcript variant X1	-1.26
Qrob_T0149750.2		-1.26
Qrob_T0585170.2	transcription initiation factor TFIID subunit 6, transcript variant X1	-1.26
Qrob_T0171640.2	ent-kaurene oxidase, chloroplastic-like	-1.25
Qrob_T0541470.2	21 kDa protein-like	-1.25
Qrob_T0090850.2	casparian strip membrane protein 1-like	-1.25
Qrob_T0366610.2	probably inactive receptor-like protein kinase At2g46850	-1.25
Qrob_T0322480.2	bidirectional sugar transporter SWEET1-like, transcript variant X2	-1.25
Qrob_T0397170.2	stigma-specific STIG1-like protein 1	-1.25
Qrob_T0007990.2	DNA (cytosine-5)-methyltransferase CMT3	-1.25
Qrob_T0175490.2		-1.25
Qrob_T0532300.2	LRR receptor-like serine/threonine-protein kinase RCH1	-1.25
Qrob_T0128340.2		-1.25
Qrob_T0126780.2	protein EARLY RESPONSIVE TO DEHYDRATION 15-like	-1.25
Qrob_T0759260.2	60S ribosomal protein L17-2-like	-1.25
Qrob_T0578130.2	glycolipid transfer protein 1, transcript variant X4	-1.25
Qrob_T0136350.2	succinate--CoA ligase [ADP-forming] subunit beta, mitochondrial	-1.25
Qrob_T0553900.2	glycosyltransferase-like KOBITO 1	-1.25
Qrob_T0184370.2	60S ribosomal protein L29-1-like	-1.25
Qrob_T0313880.2	protein argonaute 10, transcript variant X4	-1.25
Qrob_T0463770.2	26S proteasome non-ATPase regulatory subunit 4 homolog	-1.25
Qrob_T0018710.2	glycosyltransferase BC10, transcript variant X3	-1.24
Qrob_T0055720.2	serine carboxypeptidase-like 17, transcript variant X1	-1.24
Qrob_T0337590.2	laccase-14-like, transcript variant X1	-1.24
Qrob_T0264710.2	probable beta-1,4-xylosyltransferase IRX9H, transcript variant X3	-1.24
Qrob_T0467800.2	L-type lectin-domain containing receptor kinase IX.1-like, transcript variant X1	-1.24
Qrob_T0642550.2	cation/H(+) antiporter 20-like	-1.24
Qrob_T0112740.2	trehalose-phosphate phosphatase A-like, transcript variant X4	-1.24
Qrob_T0014200.2	probable methyltransferase PMT16	-1.24
Qrob_T0086610.2	GDSL esterase/lipase At1g28580-like	-1.24
Qrob_T0446570.2	ethylene-responsive transcription factor ERF053-like	-1.24
Qrob_T0731990.2	N-acylphosphatidylethanolamine synthase, transcript variant X1	-1.24
Qrob_T0256800.2	probable auxin efflux carrier component 1b	-1.24
Qrob_T0321570.2	probable protein phosphatase 2C 76, transcript variant X2	-1.24
Qrob_T0297680.2	putative calcium-transporting ATPase 13, plasma membrane-type	-1.23
Qrob_T0050590.2		-1.23
Qrob_T0491360.2	beta-glucosidase 13-like	-1.23
Qrob_T0442920.2	protein FANTASTIC FOUR 1-like	-1.23
Qrob_T0686490.2	auxin transporter-like protein 3	-1.23
Qrob_T0568560.2	triose phosphate/phosphate translocator, chloroplastic-like	-1.23
Qrob_T0489160.2	histone H2A variant 1	-1.23
Qrob_T0266820.2	transcription repressor OFP13	-1.23
Qrob_T0698130.2	serine/threonine-protein kinase Aurora-1	-1.23
Qrob_T0473660.2	endoglucanase 10	-1.23
Qrob_T0365420.2	ABC transporter B family member 19	-1.23
Qrob_T0207350.2	basic form of pathogenesis-related protein 1-like	-1.23
Qrob_T0629240.2	flavin-containing monooxygenase FMO GS-OX-like 4, transcript variant X1	-1.23
Qrob_T0005950.2	serine/threonine-protein kinase STY13-like	-1.23
Qrob_T0064150.2	probable polyamine oxidase 4	-1.23
Qrob_T0663930.2	nuclear transcription factor Y subunit A-1	-1.23
Qrob_T0279110.2	non-specific lipid-transfer protein-like protein At2g13820, transcript variant X2	-1.23
Qrob_T0485290.2	umecyanin-like	-1.23
Qrob_T0721670.2	50S ribosomal protein L22, chloroplastic-like	-1.23
Qrob_T0087790.2	uncharacterized LOC115970726	-1.23
Qrob_T0573030.2	14-3-3 protein 9-like, transcript variant X2	-1.23
Qrob_T0527260.2	serine carboxypeptidase-like, transcript variant X2	-1.22
Qrob_T0615080.2		-1.22
Qrob_T0184690.2	major allergen Pru ar 1-like	-1.22
Qrob_T0446440.2	expansin-B3-like	-1.22
Qrob_T0128910.2	protein BIG GRAIN 1-like E	-1.22
Qrob_T0418040.2	uncharacterized LOC115995066, transcript variant X2	-1.22
Qrob_T0215040.2	probable glucan 1,3-beta-glucosidase A	-1.22
Qrob_T0530630.2	probable receptor-like protein kinase At1g49730	-1.22
Qrob_T0560600.2	acid phosphatase 1-like	-1.22
Qrob_T0689080.2	tubulin alpha chain	-1.22
Qrob_T0657110.2	RHOMBOID-like protein 2	-1.22
Qrob_T0060020.2	SUMO-conjugating enzyme SCE1-like	-1.22
Qrob_T0438940.2	60S ribosomal protein L12	-1.22
Qrob_T0660330.2	ATP-dependent zinc metalloprotease FTSH 10, mitochondrial-like	-1.22
Qrob_T0411940.2		-1.21
Qrob_T0440030.2	probable pectinesterase/pectinesterase inhibitor 7, transcript variant X1	-1.21
Qrob_T0102830.2		-1.21
Qrob_T0138710.2	alcohol dehydrogenase 1	-1.21
Qrob_T0247770.2	TMV resistance protein N-like	-1.21
Qrob_T0014250.2	probable (S)-N-methylcoclaurine 3'-hydroxylase isozyme 2, transcript variant X1	-1.21
Qrob_T0198270.2	rop guanine nucleotide exchange factor 14, transcript variant X4	-1.21
Qrob_T0315420.2	UDP-D-apiose/UDP-D-xylose synthase 2	-1.21
Qrob_T0663630.2	germin-like protein subfamily 1 member 7	-1.21
Qrob_T0071340.2	uncharacterized LOC115977220	-1.21
Qrob_T0383660.2	inactive protein RESTRICTED TEV MOVEMENT 2-like	-1.2
Qrob_T0468600.2	putative nuclear RNA export factor SDE5, transcript variant X6	-1.2
Qrob_T0151720.2	glutathione S-transferase-like	-1.2
Qrob_T0374610.2	auxin response factor 9	-1.2
Qrob_T0636430.2	uncharacterized LOC115969926	-1.2
Qrob_T0530060.2	probable aquaporin PIP2-5	-1.2
Qrob_T0460900.2	basic form of pathogenesis-related protein 1-like	-1.2
Qrob_T0732700.2		-1.2
Qrob_T0619130.2	probable DNA double-strand break repair Rad50 ATPase, transcript variant X2	-1.2
Qrob_T0303820.2	18.5 kDa class I heat shock protein-like	-1.2
Qrob_T0642310.2	ubiquitin-conjugating enzyme E2 27, transcript variant X1	-1.2
Qrob_T0542780.2	40S ribosomal protein S10-1-like	-1.2
Qrob_T0393410.2	potassium transporter 5-like	-1.19
Qrob_T0519100.2	embryo-specific protein ATS3A-like	-1.19
Qrob_T0227100.2	9-cis-epoxycarotenoid dioxygenase NCED2, chloroplastic	-1.19
Qrob_T0650030.2	soyasapogenol B glucuronide galactosyltransferase-like	-1.19
Qrob_T0530460.2	fasciclin-like arabinogalactan protein 15	-1.19
Qrob_T0369710.2	uncharacterized LOC115975007	-1.19
Qrob_T0216930.2		-1.19
Qrob_T0001950.2	uncharacterized LOC115995024	-1.19
Qrob_T0068210.2	uncharacterized LOC115977165	-1.19
Qrob_T0469510.2	anoctamin-like protein At1g73020, transcript variant X2	-1.19
Qrob_T0703790.2	protein IRX15-LIKE-like	-1.19
Qrob_T0402270.2	ethylene-responsive transcription factor RAP2-7, transcript variant X1	-1.19
Qrob_T0016510.2		-1.19
Qrob_T0311980.2	aminomethyltransferase, mitochondrial	-1.19
Qrob_T0732630.2	probable protein S-acyltransferase 22	-1.19
Qrob_T0144580.2		-1.19
Qrob_T0742360.2		-1.19
Qrob_T0609890.2	prohibitin-3, mitochondrial-like	-1.19
Qrob_T0540200.2	biotin carboxyl carrier protein of acetyl-CoA carboxylase-like, transcript variant X1	-1.19
Qrob_T0240840.2	probable serine/threonine-protein kinase PBL8	-1.19
Qrob_T0447950.2	uncharacterized LOC115958425	-1.19
Qrob_T0175510.2	squalene synthase 1-like	-1.19
Qrob_T0610140.2	mechanosensitive ion channel protein 6-like	-1.19
Qrob_T0140990.2	14-3-3-like protein B	-1.19
Qrob_T0524890.2	eukaryotic translation initiation factor 2-alpha kinase-like	-1.18
Qrob_T0570760.2	protein RADIALIS-like 3, transcript variant X1	-1.18
Qrob_T0548940.2		-1.18
Qrob_T0017240.2	protein DMR6-LIKE OXYGENASE 2-like, transcript variant X2	-1.18
Qrob_T0215150.2	heavy metal-associated isoprenylated plant protein 24, transcript variant X2	-1.18
Qrob_T0612980.2	LOB domain-containing protein 4-like	-1.18
Qrob_T0135880.2		-1.18
Qrob_T0055390.2	protein SPIRAL1-like 2, transcript variant X2	-1.18
Qrob_T0573490.2	putative DNA glycosylase At3g47830	-1.18
Qrob_T0081770.2	elicitor-responsive protein 3, transcript variant X2	-1.18
Qrob_T0279490.2	probable linoleate 9S-lipoxygenase 5, transcript variant X3	-1.18
Qrob_T0505590.2	acyl-protein thioesterase 2	-1.18
Qrob_T0581360.2		-1.18
Qrob_T0082250.2	ADP-ribosylation factor, transcript variant X2	-1.18
Qrob_T0626460.2	uncharacterized LOC115955980	-1.17
Qrob_T0478480.2		-1.17
Qrob_T0491370.2	beta-glucosidase 13-like	-1.17
Qrob_T0405330.2		-1.17
Qrob_T0629370.2	auxin-induced protein IAA6-like	-1.17
Qrob_T0737180.2	uncharacterized LOC115971990	-1.17
Qrob_T0687890.2	probable copper-transporting ATPase HMA5	-1.17
Qrob_T0486360.2	protein NRT1/ PTR FAMILY 4.3	-1.17
Qrob_T0292050.2		-1.17
Qrob_T0172750.2	salicylic acid-binding protein 2-like	-1.17
Qrob_T0691610.2	laccase-15-like	-1.17
Qrob_T0584180.2	tropinone reductase homolog At5g06060-like	-1.17
Qrob_T0356620.2	probable acyl-activating enzyme 18, peroxisomal, transcript variant X1	-1.17
Qrob_T0190650.2		-1.17
Qrob_T0030540.2	uncharacterized LOC115982677, transcript variant X1	-1.17
Qrob_T0079230.2	probable serine/threonine-protein kinase At1g01540, transcript variant X3	-1.17
Qrob_T0759600.2	glutamate synthase [NADH], amyloplastic	-1.17
Qrob_T0403220.2	sucrose synthase, transcript variant X2	-1.17
Qrob_T0747290.2	protein SUPPRESSOR OF K(+) TRANSPORT GROWTH DEFECT 1-like, transcript variant X1	-1.16
Qrob_T0748500.2	beta-glucosidase 13-like, transcript variant X1	-1.16
Qrob_T0190210.2	probable disease resistance protein At5g66900	-1.16
Qrob_T0412150.2		-1.16
Qrob_T0613690.2	xyloglucan endotransglucosylase/hydrolase protein 9-like	-1.16
Qrob_T0665430.2	basic leucine zipper 4-like	-1.16
Qrob_T0628760.2	metallothiol transferase FosB-like	-1.16
Qrob_T0636930.2	FT-interacting protein 1-like	-1.16
Qrob_T0687110.2	peroxidase N-like	-1.16
Qrob_T0608360.2	probable membrane-associated kinase regulator 5, transcript variant X3	-1.16
Qrob_T0509650.2	alpha-xylosidase 1-like	-1.16
Qrob_T0667540.2	leucoanthocyanidin reductase-like	-1.16
Qrob_T0206870.2	phosphoglucomutase, chloroplastic	-1.16
Qrob_T0283340.2	cytochrome c oxidase subunit 5C-like	-1.16
Qrob_T0283260.2	2-oxoisovalerate dehydrogenase subunit alpha 2, mitochondrial-like	-1.16
Qrob_T0450310.2	uncharacterized LOC115989140	-1.16
Qrob_T0367150.2	nuclear transcription factor Y subunit B-3-like	-1.16
Qrob_T0211060.2	protein SAR DEFICIENT 1-like	-1.15
Qrob_T0466500.2	uncharacterized LOC115957792	-1.15
Qrob_T0075780.2	uncharacterized protein At4g38062-like, transcript variant X3	-1.15
Qrob_T0579160.2	probable protein phosphatase 2C 12	-1.15
Qrob_T0363010.2	kinesin-like protein KIN-14T, transcript variant X3	-1.15
Qrob_T0221580.2	pyrophosphate-energized vacuolar membrane proton pump, transcript variant X2	-1.15
Qrob_T0019170.2	protein NETWORKED 3A-like	-1.15
Qrob_T0766390.2		-1.15
Qrob_T0218850.2	ABSCISIC ACID-INSENSITIVE 5-like protein 2, transcript variant X3	-1.15
Qrob_T0511530.2	xanthoxin dehydrogenase-like	-1.15
Qrob_T0053140.2	CDPK-related kinase 5	-1.15
Qrob_T0029990.2	plastidic glucose transporter 4-like, transcript variant X4	-1.15
Qrob_T0705430.2	ELMO domain-containing protein A-like, transcript variant X2	-1.15
Qrob_T0026970.2	V-type proton ATPase subunit H	-1.15
Qrob_T0695210.2	probable aspartic proteinase GIP2	-1.15
Qrob_T0347810.2	uncharacterized LOC115966378	-1.14
Qrob_T0036060.2		-1.14
Qrob_T0687100.2	peroxidase N-like	-1.14
Qrob_T0135120.2	glyceraldehyde-3-phosphate dehydrogenase A, chloroplastic	-1.14
Qrob_T0039420.2	bifunctional dihydroflavonol 4-reductase/flavanone 4-reductase-like, transcript variant X1	-1.14
Qrob_T0685350.2	3-ketoacyl-CoA synthase 4-like	-1.14
Qrob_T0590270.2	mannose-1-phosphate guanylyltransferase 1	-1.14
Qrob_T0183240.2	inositol-3-phosphate synthase	-1.14
Qrob_T0052850.2	autophagy-related protein 8C-like	-1.14
Qrob_T0204620.2	prolyl endopeptidase-like, transcript variant X1	-1.14
Qrob_T0285200.2	pseudouridine kinase, transcript variant X1	-1.14
Qrob_T0014300.2	F-box protein At4g00755-like	-1.14
Qrob_T0045690.2	cytochrome b5	-1.14
Qrob_T0468620.2	MLO-like protein 11, transcript variant X2	-1.14
Qrob_T0636920.2	60S ribosomal protein L6-1-like	-1.14
Qrob_T0389860.2		-1.14
Qrob_T0619460.2		-1.14
Qrob_T0198370.2	NDR1/HIN1-like protein 12	-1.13
Qrob_T0637060.2	phospholipase A1-Igamma3, chloroplastic-like	-1.13
Qrob_T0023130.2		-1.13
Qrob_T0033040.2	senescence-associated carboxylesterase 101-like, transcript variant X3	-1.13
Qrob_T0470650.2	subtilisin-like protease SBT5.6	-1.13
Qrob_T0245120.2	heptahelical transmembrane protein 1	-1.13
Qrob_T0358970.2		-1.13
Qrob_T0501460.2		-1.13
Qrob_T0516370.2	(DL)-glycerol-3-phosphatase 2	-1.13
Qrob_T0608690.2	phosphoenolpyruvate carboxylase, housekeeping isozyme	-1.13
Qrob_T0376340.2	14-3-3-like protein	-1.13
Qrob_T0694390.2	inactive protein RESTRICTED TEV MOVEMENT 2-like	-1.12
Qrob_T0175530.2	subtilisin-like protease SBT3.9, transcript variant X1	-1.12
Qrob_T0457660.2	LOB domain-containing protein 15	-1.12
Qrob_T0500250.2	uncharacterized LOC115981775, transcript variant X4	-1.12
Qrob_T0157110.2	endoglucanase 3-like	-1.12
Qrob_T0388490.2	protein SWEETIE, transcript variant X2	-1.12
Qrob_T0200070.2		-1.12
Qrob_T0127830.2	uncharacterized LOC115959760	-1.12
Qrob_T0366480.2		-1.12
Qrob_T0156020.2		-1.12
Qrob_T0035650.2	auxin-responsive protein IAA4	-1.12
Qrob_T0511790.2	annexin D4	-1.11
Qrob_T0008150.2		-1.11
Qrob_T0492760.2	germin-like protein subfamily 1 member 14	-1.11
Qrob_T0039230.2	scarecrow-like protein 3	-1.11
Qrob_T0066930.2	protein PLANT CADMIUM RESISTANCE 2-like	-1.11
Qrob_T0337680.2	laccase-14-like	-1.11
Qrob_T0366520.2	NAC domain-containing protein 96-like	-1.11
Qrob_T0096890.2	AP2-like ethylene-responsive transcription factor AIL6	-1.11
Qrob_T0377800.2	tetraspanin-18	-1.11
Qrob_T0290010.2	transcription factor bHLH25-like, transcript variant X1	-1.11
Qrob_T0111480.2		-1.11
Qrob_T0696750.2		-1.1
Qrob_T0077270.2	protein NRT1/ PTR FAMILY 3.1-like	-1.1
Qrob_T0045250.2	blue copper protein	-1.1
Qrob_T0655200.2	probable aspartyl protease At4g16563	-1.1
Qrob_T0085720.2	beta-galactosidase 17-like	-1.1
Qrob_T0015350.2	alcohol dehydrogenase B-like	-1.1
Qrob_T0144280.2	probable calcium-binding protein CML23	-1.1
Qrob_T0203720.2	receptor protein kinase-like protein At4g34220	-1.1
Qrob_T0528770.2	probable LRR receptor-like serine/threonine-protein kinase At1g34110	-1.1
Qrob_T0351630.2	centromere-associated protein E	-1.1
Qrob_T0517910.2	uncharacterized LOC115992916	-1.1
Qrob_T0486760.2	acyl-CoA--sterol O-acyltransferase 1-like	-1.1
Qrob_T0462540.2	26S proteasome non-ATPase regulatory subunit 2 homolog A-like	-1.1
Qrob_T0076050.2	peroxidase 12	-1.1
Qrob_T0337950.2	B3 domain-containing protein At5g42700-like	-1.09
Qrob_T0035660.2	auxin-responsive protein IAA14-like	-1.09
Qrob_T0369790.2	cytochrome P450 94A1-like	-1.09
Qrob_T0688560.2	TMV resistance protein N-like, transcript variant X3	-1.09
Qrob_T0556890.2		-1.09
Qrob_T0252840.2	probable calcium-binding protein CML43	-1.09
Qrob_T0107370.2	serine/threonine-protein kinase Nek2, transcript variant X3	-1.09
Qrob_T0434850.2	histone H3.2	-1.09
Qrob_T0371840.2	receptor-like protein 46	-1.09
Qrob_T0194910.2	pentatricopeptide repeat-containing protein At2g44880	-1.09
Qrob_T0033200.2	methionine adenosyltransferase 2 subunit beta, transcript variant X1	-1.09
Qrob_T0719130.2	peroxidase 72-like	-1.09
Qrob_T0589140.2	glucan endo-1,3-beta-glucosidase 11-like	-1.09
Qrob_T0028330.2	LIM domain-containing protein WLIM1-like	-1.09
Qrob_T0087710.2	(S)-ureidoglycine aminohydrolase	-1.09
Qrob_T0209560.2	uncharacterized LOC115983771	-1.09
Qrob_T0291520.2	transcription factor PIF3, transcript variant X2	-1.09
Qrob_T0099270.2	lysosomal Pro-X carboxypeptidase, transcript variant X1	-1.09
Qrob_T0030690.2	spermidine synthase 1	-1.09
Qrob_T0020930.2	ubiquitin-40S ribosomal protein S27a	-1.09
Qrob_T0239040.2	WUSCHEL-related homeobox 13, transcript variant X2	-1.09
Qrob_T0052270.2		-1.08
Qrob_T0018830.2	cryptochrome DASH, chloroplastic/mitochondrial, transcript variant X1	-1.08
Qrob_T0261170.2		-1.08
Qrob_T0555640.2	uncharacterized LOC115962796	-1.08
Qrob_T0693280.2	glycine-rich cell wall structural protein 1.8-like	-1.08
Qrob_T0316510.2		-1.08
Qrob_T0675450.2	transcription repressor MYB4-like	-1.08
Qrob_T0438200.2	probable xyloglucan endotransglucosylase/hydrolase protein 8	-1.08
Qrob_T0292040.2	epimerase family protein SDR39U1 homolog, chloroplastic	-1.08
Qrob_T0641030.2	uncharacterized protein At3g50808-like	-1.08
Qrob_T0691310.2	uncharacterized LOC115994902	-1.08
Qrob_T0437960.2	phospholipase D alpha 1-like, transcript variant X2	-1.08
Qrob_T0177560.2	uncharacterized LOC115972051	-1.08
Qrob_T0135150.2	heparan-alpha-glucosaminide N-acetyltransferase	-1.08
Qrob_T0278350.2	probable xyloglucan endotransglucosylase/hydrolase protein 23	-1.08
Qrob_T0290020.2	L-galactose dehydrogenase	-1.08
Qrob_T0711950.2	single-stranded DNA-binding protein, mitochondrial	-1.08
Qrob_T0052830.2	probable beta-1,3-galactosyltransferase 2, transcript variant X1	-1.08
Qrob_T0257140.2	histone H3.2	-1.08
Qrob_T0437760.2	cellulose synthase A catalytic subunit 1 [UDP-forming]-like	-1.08
Qrob_T0207140.2		-1.08
Qrob_T0216680.2	probable inactive DNA (cytosine-5)-methyltransferase DRM3, transcript variant X1	-1.08
Qrob_T0464270.2	GDP-L-fucose synthase 1-like, transcript variant X4	-1.08
Qrob_T0114120.2	uncharacterized LOC115982272, transcript variant X3	-1.08
Qrob_T0576660.2		-1.08
Qrob_T0671240.2	polygalacturonate 4-alpha-galacturonosyltransferase	-1.08
Qrob_T0561400.2	proteasome subunit beta type-1	-1.08
Qrob_T0628670.2	TMV resistance protein N-like	-1.07
Qrob_T0436340.2	peroxidase 27-like	-1.07
Qrob_T0166780.2	flavonoid 3'-monooxygenase	-1.07
Qrob_T0255620.2	rho GDP-dissociation inhibitor 1-like	-1.07
Qrob_T0270730.2		-1.07
Qrob_T0728610.2	65-kDa microtubule-associated protein 3, transcript variant X2	-1.07
Qrob_T0120220.2	polyribonucleotide nucleotidyltransferase 1, chloroplastic, transcript variant X2	-1.07
Qrob_T0267230.2	ATP-dependent DNA helicase DDM1, transcript variant X2	-1.07
Qrob_T0313590.2	uncharacterized LOC115950660	-1.07
Qrob_T0726340.2	serine carboxypeptidase-like 40	-1.06
Qrob_T0171660.2	ent-kaurene oxidase, chloroplastic-like	-1.06
Qrob_T0573630.2	BTB/POZ and TAZ domain-containing protein 3-like, transcript variant X2	-1.06
Qrob_T0700040.2	4-coumarate--CoA ligase-like 9, transcript variant X1	-1.06
Qrob_T0014150.2	RHOMBOID-like protein 3	-1.06
Qrob_T0255470.2		-1.06
Qrob_T0491260.2	cell division control protein 2 homolog C	-1.06
Qrob_T0770680.2	E3 ubiquitin-protein ligase complex slx8-rfp subunit slx8-like, transcript variant X1	-1.06
Qrob_T0167800.2		-1.06
Qrob_T0437650.2	protein KINESIN LIGHT CHAIN-RELATED 1-like	-1.06
Qrob_T0392310.2	uncharacterized LOC115993646	-1.06
Qrob_T0626510.2		-1.06
Qrob_T0318460.2	exocyst complex component SEC3A	-1.06
Qrob_T0310380.2	auxin-responsive protein SAUR78-like	-1.05
Qrob_T0633220.2	GATA transcription factor 12-like	-1.05
Qrob_T0055710.2	serine carboxypeptidase-like 17, transcript variant X2	-1.05
Qrob_T0660290.2	laccase-2-like, transcript variant X3	-1.05
Qrob_T0204640.2	prolyl endopeptidase-like	-1.05
Qrob_T0635200.2	G-type lectin S-receptor-like serine/threonine-protein kinase LECRK1	-1.05
Qrob_T0384750.2	uncharacterized LOC115981981	-1.05
Qrob_T0133230.2	CO(2)-response secreted protease-like, transcript variant X1	-1.05
Qrob_T0359940.2		-1.05
Qrob_T0013950.2	protein yippee-like At5g53940	-1.05
Qrob_T0183130.2	zinc finger CCCH domain-containing protein 30-like	-1.05
Qrob_T0045550.2	3-oxo-Delta(4,5)-steroid 5-beta-reductase-like	-1.05
Qrob_T0701400.2	acyl transferase 4-like	-1.04
Qrob_T0337660.2	laccase-14-like	-1.04
Qrob_T0187460.2	double-stranded RNA-binding protein 5, transcript variant X1	-1.04
Qrob_T0438480.2	laccase-11-like	-1.04
Qrob_T0662760.2	tubulin beta chain-like	-1.04
Qrob_T0364040.2	subtilisin-like protease SBT4.14	-1.04
Qrob_T0346420.2	protein POLLENLESS 3-LIKE 2	-1.04
Qrob_T0089970.2	early nodulin-like protein 1	-1.04
Qrob_T0337860.2	uncharacterized LOC115974397	-1.04
Qrob_T0217910.2	uncharacterized LOC115994800	-1.04
Qrob_T0543730.2	lamin-like protein	-1.04
Qrob_T0049520.2	c-Myc-binding protein-like	-1.04
Qrob_T0186880.2	long chain acyl-CoA synthetase 9, chloroplastic, transcript variant X3	-1.04
Qrob_T0344310.2	elongation factor 1-gamma 2-like	-1.04
Qrob_T0413530.2	formin-like protein 6	-1.04
Qrob_T0130650.2	cellulose synthase A catalytic subunit 2 [UDP-forming]-like	-1.04
Qrob_T0714310.2	calcium-binding allergen Bet v 3-like	-1.04
Qrob_T0129350.2	dirigent protein 22-like	-1.04
Qrob_T0388250.2	FAD synthase, transcript variant X5	-1.04
Qrob_T0222380.2		-1.04
Qrob_T0210740.2	COP1-interacting protein 7, transcript variant X2	-1.04
Qrob_T0257000.2	G2/mitotic-specific cyclin S13-7-like	-1.03
Qrob_T0647270.2	2-alkenal reductase (NADP(+)-dependent)-like	-1.03
Qrob_T0462220.2	non-specific lipid transfer protein GPI-anchored 2-like	-1.03
Qrob_T0580610.2	ABC transporter G family member 23, transcript variant X1	-1.03
Qrob_T0265960.2	interactor of constitutive active ROPs 2, chloroplastic, transcript variant X7	-1.03
Qrob_T0171010.2	uncharacterized LOC115957572, transcript variant X2	-1.03
Qrob_T0578880.2	pectinesterase-like	-1.03
Qrob_T0244380.2	laccase-13-like	-1.03
Qrob_T0356970.2		-1.03
Qrob_T0112010.2		-1.03
Qrob_T0126560.2	uncharacterized LOC115957750	-1.03
Qrob_T0435940.2	protein ESKIMO 1, transcript variant X2	-1.03
Qrob_T0112320.2	ABC transporter G family member 14	-1.03
Qrob_T0043930.2	probable galacturonosyltransferase 15, transcript variant X2	-1.03
Qrob_T0107970.2		-1.03
Qrob_T0738990.2	mitochondrial import inner membrane translocase subunit PAM16 like 2	-1.03
Qrob_T0543670.2	UDP-glycosyltransferase 13-like	-1.03
Qrob_T0352410.2	TBC1 domain family member 2B, transcript variant X2	-1.03
Qrob_T0032110.2	outer envelope pore protein 37, chloroplastic-like	-1.03
Qrob_T0577630.2	protein DEHYDRATION-INDUCED 19 homolog 4-like	-1.03
Qrob_T0531820.2	uncharacterized LOC115969025	-1.03
Qrob_T0631430.2	universal stress protein PHOS32	-1.03
Qrob_T0496840.2	microtubule-associated protein RP/EB family member 1A	-1.03
Qrob_T0106730.2	ATP-dependent Clp protease proteolytic subunit 6, chloroplastic-like	-1.03
Qrob_T0262940.2		-1.03
Qrob_T0243820.2	leucine-rich repeat protein 1-like	-1.03
Qrob_T0026920.2	prohibitin-1, mitochondrial	-1.03
Qrob_T0616390.2		-1.02
Qrob_T0058060.2	shikimate O-hydroxycinnamoyltransferase-like	-1.02
Qrob_T0415270.2		-1.02
Qrob_T0737550.2	uncharacterized LOC115964170	-1.02
Qrob_T0289920.2	alcohol dehydrogenase 1-like	-1.02
Qrob_T0551190.2	UDP-glucuronic acid decarboxylase 2-like	-1.02
Qrob_T0286270.2		-1.02
Qrob_T0412470.2	aquaporin TIP2-1	-1.02
Qrob_T0422510.2	putative laccase-9	-1.02
Qrob_T0277920.2	muscle M-line assembly protein unc-89, transcript variant X2	-1.02
Qrob_T0676290.2	thaumatin-like protein 1	-1.02
Qrob_T0683640.2	peroxidase 42	-1.02
Qrob_T0167770.2	syntaxin-related protein KNOLLE	-1.02
Qrob_T0560800.2	WD repeat-containing protein WRAP73, transcript variant X1	-1.02
Qrob_T0159430.2	crocetin glucosyltransferase, chloroplastic-like	-1.02
Qrob_T0247530.2	brassinosteroid-related acyltransferase 1-like	-1.02
Qrob_T0492030.2	protein E6-like	-1.02
Qrob_T0728150.2	kinesin-like protein KIN-14E, transcript variant X2	-1.02
Qrob_T0112680.2	alpha,alpha-trehalose-phosphate synthase [UDP-forming] 5, transcript variant X3	-1.02
Qrob_T0618920.2		-1.02
Qrob_T0027030.2	WEB family protein At3g02930, chloroplastic-like	-1.02
Qrob_T0523570.2	pleiotropic drug resistance protein 1-like	-1.02
Qrob_T0454810.2	40S ribosomal protein S23	-1.02
Qrob_T0479240.2	protein TSS, transcript variant X4	-1.01
Qrob_T0196890.2	G2/mitotic-specific cyclin-2, transcript variant X2	-1.01
Qrob_T0674830.2		-1.01
Qrob_T0434090.2	protein FIZZY-RELATED 3	-1.01
Qrob_T0004180.2	laccase-12-like	-1.01
Qrob_T0425450.2	uncharacterized LOC115973662, transcript variant X2	-1.01
Qrob_T0609950.2	lysine histidine transporter 1-like, transcript variant X1	-1.01
Qrob_T0482840.2	50S ribosomal protein L18-like	-1.01
Qrob_T0206840.2		-1.01
Qrob_T0211560.2	chalcone--flavonone isomerase-like	-1.01
Qrob_T0731980.2	myosin-12-like	-1.01
Qrob_T0376740.2	14-3-3-like protein	-1.01
Qrob_T0522030.2	reticulon-4-interacting protein 1, mitochondrial	-1.01
Qrob_T0412990.2	histone H4	-1.01
Qrob_T0068800.2	30S ribosomal protein S5, chloroplastic	-1.01
Qrob_T0391320.2	uncharacterized LOC115953280	-1.01
Qrob_T0301040.2	uncharacterized LOC115986849, transcript variant X2	-1.01
Qrob_T0413820.2	uncharacterized LOC115950837	-1.01
Qrob_T0438990.2	probable aquaporin PIP2-5	-1
Qrob_T0139270.2		-1
Qrob_T0322110.2	ABC transporter C family member 10-like	-1
Qrob_T0492610.2		-1
Qrob_T0214940.2	probable beta-D-xylosidase 7	-1
Qrob_T0679250.2	transcription factor PAR2	-1
Qrob_T0532490.2	3-ketoacyl-CoA thiolase 2, peroxisomal-like	-1
Qrob_T0041080.2	ATP-dependent DNA helicase Q-like 1	-1
Qrob_T0674900.2	probable pectinesterase/pectinesterase inhibitor 34	-1
Qrob_T0182280.2	receptor-like protein 51	-1
Qrob_T0417170.2		-1
Qrob_T0081980.2	COP1-interactive protein 1	-1
Qrob_T0021020.2	shaggy-related protein kinase epsilon, transcript variant X4	-1
Qrob_T0624280.2	uncharacterized LOC115974326	-1
Qrob_T0570600.2	60S ribosomal protein L6, mitochondrial-like	-1
Qrob_T0441300.2	uncharacterized LOC115956598	-1
Qrob_T0287740.2	single-stranded DNA-binding protein, mitochondrial-like	-1
Qrob_T0417370.2	MATH and LRR domain-containing protein PFE0570w-like	-1
Qrob_T0657060.2	auxin-responsive protein SAUR76	-1
Qrob_T0464410.2	uncharacterized LOC115959863, transcript variant X13	-1
Qrob_T0598980.2		-1
Qrob_T0511030.2	uncharacterized LOC115974543	-1
Qrob_T0497620.2	3-phosphoshikimate 1-carboxyvinyltransferase 2	-1
Qrob_T0190370.2	suppressor of mec-8 and unc-52 protein homolog 1, transcript variant X1	-1
Qrob_T0045720.2	cytochrome c oxidase subunit 6b-1	-1
Qrob_T0568930.2	ALA-interacting subunit 3	-1
Qrob_T0359900.2		-0.99
Qrob_T0367140.2	fasciclin-like arabinogalactan protein 2	-0.99
Qrob_T0491340.2	beta-glucosidase 13-like	-0.99
Qrob_T0064600.2	uncharacterized LOC115988779	-0.99
Qrob_T0348320.2		-0.99
Qrob_T0361170.2	transcription factor BEE 1-like	-0.99
Qrob_T0071770.2		-0.99
Qrob_T0523140.2	novel plant SNARE 11-like, transcript variant X4	-0.99
Qrob_T0251450.2	uncharacterized LOC115968651	-0.99
Qrob_T0707330.2	dual specificity protein phosphatase PHS1, transcript variant X1	-0.99
Qrob_T0307300.2	uncharacterized LOC115975753	-0.99
Qrob_T0377860.2		-0.99
Qrob_T0601400.2	uncharacterized LOC115987498	-0.99
Qrob_T0050730.2	protein BASIC PENTACYSTEINE7, transcript variant X1	-0.99
Qrob_T0752840.2	GATA transcription factor 5	-0.99
Qrob_T0075440.2	methylmalonate-semialdehyde dehydrogenase [acylating], mitochondrial-like, transcript variant X2	-0.99
Qrob_T0647350.2	uncharacterized LOC115952796	-0.99
Qrob_T0297600.2	two-component response regulator ARR12-like	-0.99
Qrob_T0612990.2		-0.99
Qrob_T0098460.2	probable aquaporin SIP2-1	-0.99
Qrob_T0320980.2		-0.99
Qrob_T0368400.2	protein PLANT CADMIUM RESISTANCE 2-like	-0.98
Qrob_T0738970.2	NAC domain-containing protein 73-like	-0.98
Qrob_T0066860.2	endoglucanase 8-like, transcript variant X1	-0.98
Qrob_T0237590.2	dirigent protein 22-like	-0.98
Qrob_T0712730.2	cellulose synthase A catalytic subunit 8 [UDP-forming]	-0.98
Qrob_T0384440.2	WAT1-related protein At5g40230-like	-0.98
Qrob_T0059340.2	UPF0481 protein At3g47200-like, transcript variant X3	-0.98
Qrob_T0398890.2	probable polygalacturonase	-0.98
Qrob_T0161060.2	BTB/POZ and TAZ domain-containing protein 3-like, transcript variant X3	-0.98
Qrob_T0055640.2		-0.98
Qrob_T0590170.2	protein HESO1-like	-0.98
Qrob_T0599700.2	uncharacterized LOC115988390	-0.98
Qrob_T0034950.2	kinesin-like protein KIN-14R	-0.98
Qrob_T0673420.2	geranyl diphosphate phosphohydrolase-like	-0.98
Qrob_T0396520.2	condensin complex subunit 3	-0.98
Qrob_T0376240.2	acyl-CoA-binding domain-containing protein 3	-0.98
Qrob_T0365030.2	cytochrome b-c1 complex subunit 7-2-like	-0.98
Qrob_T0280040.2	nardilysin-like	-0.98
Qrob_T0106780.2		-0.97
Qrob_T0360070.2		-0.97
Qrob_T0289880.2	alcohol dehydrogenase 1-like, transcript variant X1	-0.97
Qrob_T0543800.2	protein WVD2-like 4, transcript variant X1	-0.97
Qrob_T0443280.2	auxin-responsive protein SAUR72-like	-0.97
Qrob_T0334850.2	GDSL esterase/lipase LTL1-like	-0.97
Qrob_T0375870.2	structural maintenance of chromosomes protein 2-1-like	-0.97
Qrob_T0647490.2	metalloendoproteinase 2-MMP-like	-0.97
Qrob_T0247840.2	vacuolar iron transporter 1	-0.97
Qrob_T0030560.2		-0.97
Qrob_T0102870.2	BTB/POZ domain-containing protein At3g19850, transcript variant X1	-0.97
[truncated: 1,631 more rows]

## Sheet: LR-DS_up-regulated
Gene	Annotation	log2FC
Qrob_T0011620.2		11.09
Qrob_T0011610.2		8
Qrob_T0318200.2	cytochrome P450 CYP82D47-like	7.05
Qrob_T0372650.2		6.38
Qrob_T0273370.2		5.98
Qrob_T0774750.2	GATA transcription factor 4-like	5.7
Qrob_T0495410.2		5.58
Qrob_T0276540.2	G-type lectin S-receptor-like serine/threonine-protein kinase At5g35370	5.54
Qrob_T0294150.2	protein NRT1/ PTR FAMILY 8.2-like	5.47
Qrob_T0438760.2	protein NRT1/ PTR FAMILY 7.3-like	5.32
Qrob_T0403290.2	cytochrome P450 CYP82D47-like	5.31
Qrob_T0256030.2	subtilisin-like protease SBT4.3	5.25
Qrob_T0432820.2	anthocyanidin 3-O-glucosyltransferase 5-like	5.16
Qrob_T0158020.2	auxin-responsive protein SAUR15-like	5.11
Qrob_T0646370.2	wall-associated receptor kinase-like 8	5.04
Qrob_T0530500.2	replication factor C subunit 1-like, transcript variant X11	4.97
Qrob_T0076600.2		4.94
Qrob_T0593820.2	probable xyloglucan endotransglucosylase/hydrolase protein 10	4.93
Qrob_T0532140.2		4.67
Qrob_T0307630.2	UDP-glycosyltransferase 71K1-like	4.65
Qrob_T0336380.2	cis-3-alkyl-4-alkyloxetan-2-one decarboxylase	4.65
Qrob_T0130920.2		4.63
Qrob_T0036550.2	transcription factor BEE 1-like	4.56
Qrob_T0123030.2	protein NRT1/ PTR FAMILY 7.3-like	4.53
Qrob_T0745690.2	beta-glucosidase 12-like, transcript variant X3	4.52
Qrob_T0200850.2	RING-H2 finger protein ATL74-like	4.51
Qrob_T0046640.2		4.51
Qrob_T0002200.2		4.41
Qrob_T0498520.2	phenylcoumaran benzylic ether reductase Betv6-like	4.37
Qrob_T0675580.2	geraniol 8-hydroxylase-like	4.35
Qrob_T0464800.2	dehydration-responsive element-binding protein 1B-like	4.34
Qrob_T0057540.2		4.17
Qrob_T0060920.2		4.13
Qrob_T0294250.2		4.08
Qrob_T0077050.2	disease resistance protein At4g27190-like	4.06
Qrob_T0516250.2	sugar transport protein 7-like	4.05
Qrob_T0721600.2	glutelin type-A 3-like	4.04
Qrob_T0450610.2		4.04
Qrob_T0492770.2	germin-like protein subfamily 1 member 14	4.04
Qrob_T0474890.2	chaperonin-like RBCX protein 1, chloroplastic	4
Qrob_T0550670.2		3.97
Qrob_T0751690.2	mediator of RNA polymerase II transcription subunit 33A-like	3.95
Qrob_T0407270.2	thaumatin-like protein 1	3.91
Qrob_T0162760.2	uncharacterized acetyltransferase At3g50280-like	3.89
Qrob_T0304030.2	7-deoxyloganetic acid glucosyltransferase-like	3.83
Qrob_T0237160.2	peroxidase 5-like	3.79
Qrob_T0513280.2	G-type lectin S-receptor-like serine/threonine-protein kinase CES101	3.77
Qrob_T0318230.2	cytochrome P450 CYP82D47-like	3.77
Qrob_T0192810.2		3.73
Qrob_T0532060.2	organelle RRM domain-containing protein 1, chloroplastic-like	3.72
Qrob_T0125570.2		3.69
Qrob_T0665810.2		3.64
Qrob_T0745660.2	beta-glucosidase 12-like, transcript variant X2	3.63
Qrob_T0565190.2	protein STABILIZED1	3.58
Qrob_T0318220.2	cytochrome P450 CYP82D47-like	3.57
Qrob_T0215460.2	glutathione S-transferase F13-like	3.52
Qrob_T0270160.2		3.5
Qrob_T0509210.2	malate synthase, glyoxysomal, transcript variant X1	3.49
Qrob_T0055870.2		3.49
Qrob_T0556170.2		3.49
Qrob_T0185890.2		3.49
Qrob_T0124110.2	probable inositol oxygenase	3.45
Qrob_T0273340.2		3.43
Qrob_T0392770.2	myrcene synthase, chloroplastic-like	3.33
Qrob_T0649650.2	putative receptor protein kinase ZmPK1	3.33
Qrob_T0219500.2	G-type lectin S-receptor-like serine/threonine-protein kinase CES101	3.3
Qrob_T0693310.2	uncharacterized LOC115971856	3.28
Qrob_T0036440.2	7-deoxyloganetin glucosyltransferase-like	3.27
Qrob_T0496000.2	dehydrin Xero 2-like	3.24
Qrob_T0642090.2	geraniol 8-hydroxylase-like	3.23
Qrob_T0162780.2	uncharacterized acetyltransferase At3g50280-like	3.2
Qrob_T0418760.2	purine permease 3-like	3.17
Qrob_T0492750.2	germin-like protein subfamily 1 member 14	3.14
Qrob_T0577260.2	glycine-rich protein 5-like	3.12
Qrob_T0303850.2	18.1 kDa class I heat shock protein-like	3.12
Qrob_T0379630.2	membrane protein PM19L	3.11
Qrob_T0481910.2		3.09
Qrob_T0750020.2		3.09
Qrob_T0753220.2	probable glutathione S-transferase	3.08
Qrob_T0418790.2	purine permease 3-like	3.05
Qrob_T0057480.2	IAA-amino acid hydrolase ILR1-like 1	3.05
Qrob_T0204920.2	cytokinin riboside 5'-monophosphate phosphoribohydrolase LOG5-like, transcript variant X1	3.02
Qrob_T0050080.2	potassium channel SKOR-like, transcript variant X4	3.02
Qrob_T0676470.2	light-regulated protein 1, chloroplastic-like	3.01
Qrob_T0057490.2	IAA-amino acid hydrolase ILR1-like 1	3
Qrob_T0139860.2	ethylene-responsive transcription factor ERF086-like	2.99
Qrob_T0468380.2	serine/threonine-protein kinase STN7, chloroplastic, transcript variant X1	2.98
Qrob_T0033290.2		2.98
Qrob_T0460870.2	thioredoxin M-type, chloroplastic-like	2.98
Qrob_T0416850.2	cyclic dof factor 3-like, transcript variant X1	2.97
Qrob_T0270150.2		2.96
Qrob_T0124160.2	probable inositol oxygenase, transcript variant X1	2.92
Qrob_T0675780.2	glutathione S-transferase U7-like	2.92
Qrob_T0154240.2	non-functional pseudokinase ZED1-like, transcript variant X2	2.92
Qrob_T0433440.2		2.92
Qrob_T0124190.2	probable inositol oxygenase	2.91
Qrob_T0312550.2	polygalacturonase	2.89
Qrob_T0463580.2	protein NUCLEAR FUSION DEFECTIVE 4-like	2.89
Qrob_T0172670.2	methylesterase 10-like, transcript variant X2	2.85
Qrob_T0252180.2		2.85
Qrob_T0519650.2		2.84
Qrob_T0601080.2	ribulose bisphosphate carboxylase small chain, chloroplastic-like	2.84
Qrob_T0296280.2		2.82
Qrob_T0264390.2	uncharacterized LOC115970492	2.82
Qrob_T0071330.2	temperature-induced lipocalin-1	2.81
Qrob_T0104240.2	uncharacterized LOC115982891	2.81
Qrob_T0387310.2	salicylate carboxymethyltransferase-like	2.81
Qrob_T0652100.2	cytochrome P450 709B2-like	2.79
Qrob_T0147910.2		2.79
Qrob_T0407330.2		2.78
Qrob_T0404690.2	uncharacterized LOC115960851	2.78
Qrob_T0137170.2	two-component response regulator-like APRR2, transcript variant X2	2.76
Qrob_T0485890.2		2.76
Qrob_T0192730.2	peroxidase 10-like	2.75
Qrob_T0353330.2		2.74
Qrob_T0341540.2	uncharacterized LOC115960928	2.73
Qrob_T0582540.2	protein SIEVE ELEMENT OCCLUSION B-like	2.72
Qrob_T0556030.2	non-lysosomal glucosylceramidase-like, transcript variant X4	2.71
Qrob_T0291920.2	probable galactinol--sucrose galactosyltransferase 5	2.71
Qrob_T0057390.2	metalloendoproteinase 2-MMP-like	2.7
Qrob_T0039450.2	thaumatin-like protein 1	2.69
Qrob_T0062800.2	lycopene epsilon cyclase, chloroplastic, transcript variant X2	2.68
Qrob_T0667620.2		2.67
Qrob_T0452490.2	G-type lectin S-receptor-like serine/threonine-protein kinase At1g11330	2.66
Qrob_T0172540.2		2.65
Qrob_T0309990.2	FCS-Like Zinc finger 17-like	2.64
Qrob_T0617470.2		2.59
Qrob_T0438770.2	protein NRT1/ PTR FAMILY 7.3-like	2.58
Qrob_T0723080.2	late embryogenesis abundant protein Lea5-like	2.56
Qrob_T0707350.2	transcription factor ICE1-like	2.56
Qrob_T0769020.2	probable nucleoredoxin 3	2.56
Qrob_T0703830.2	scopoletin glucosyltransferase-like	2.56
Qrob_T0567430.2	eukaryotic peptide chain release factor subunit 1-3-like	2.55
Qrob_T0486450.2	22.0 kDa class IV heat shock protein	2.55
Qrob_T0009560.2		2.55
Qrob_T0418750.2		2.54
Qrob_T0698930.2	protein LOL1, transcript variant X2	2.53
Qrob_T0322250.2	alpha-amylase/subtilisin inhibitor-like	2.53
Qrob_T0050350.2	replication protein A 70 kDa DNA-binding subunit C-like	2.53
Qrob_T0322230.2	alpha-amylase/subtilisin inhibitor-like	2.51
Qrob_T0345090.2	G-type lectin S-receptor-like serine/threonine-protein kinase At4g27290, transcript variant X1	2.51
Qrob_T0096690.2	salicylate carboxymethyltransferase-like	2.5
Qrob_T0001430.2	serine--glyoxylate aminotransferase	2.5
Qrob_T0180380.2		2.5
Qrob_T0303170.2	MATH domain and coiled-coil domain-containing protein At3g58370-like	2.5
Qrob_T0123020.2	protein NRT1/ PTR FAMILY 7.3-like	2.49
Qrob_T0728000.2	F-box/kelch-repeat protein At3g23880-like, transcript variant X2	2.49
Qrob_T0049140.2	ubiquinol oxidase, mitochondrial-like	2.48
Qrob_T0234590.2	GDSL esterase/lipase 1-like	2.48
Qrob_T0011460.2	cytochrome c biogenesis protein CCS1, chloroplastic-like, transcript variant X1	2.48
Qrob_T0278390.2	probable xyloglucan endotransglucosylase/hydrolase protein 23	2.46
Qrob_T0342340.2	peroxidase 10-like	2.46
Qrob_T0159330.2	crocetin glucosyltransferase, chloroplastic-like	2.45
Qrob_T0125140.2	F-box protein At3g07870-like	2.45
Qrob_T0642080.2	geraniol 8-hydroxylase-like	2.45
Qrob_T0121150.2	class I heat shock protein-like	2.43
Qrob_T0174110.2	sodium-dependent phosphate transport protein 1, chloroplastic	2.43
Qrob_T0582560.2		2.42
Qrob_T0648900.2		2.41
Qrob_T0422070.2	NAC domain containing protein 50-like	2.41
Qrob_T0336120.2	probable N-acetyltransferase HLS1	2.4
Qrob_T0546850.2	glutamine synthetase nodule isozyme	2.4
Qrob_T0180070.2	protein LURP-one-related 11-like	2.39
Qrob_T0567500.2	beta-amylase 3, chloroplastic	2.39
Qrob_T0641650.2		2.38
Qrob_T0204310.2	plastocyanin	2.37
Qrob_T0422900.2	GABA transporter 1-like, transcript variant X1	2.37
Qrob_T0108830.2		2.36
Qrob_T0331120.2	zeatin O-glucosyltransferase-like	2.35
Qrob_T0693390.2	protein SRG1-like	2.35
Qrob_T0170440.2	polygalacturonase-1 non-catalytic subunit beta-like	2.35
Qrob_T0712420.2	protein REVEILLE 1	2.34
Qrob_T0619110.2	F-box protein At2g27310-like	2.34
Qrob_T0454910.2		2.34
Qrob_T0436020.2	transcription factor bHLH51	2.34
Qrob_T0402230.2		2.34
Qrob_T0261140.2	putative oxidoreductase TDA3, transcript variant X2	2.33
Qrob_T0519750.2	cysteine-rich repeat secretory protein 38-like	2.33
Qrob_T0335670.2	(-)-germacrene D synthase-like	2.33
Qrob_T0688820.2	EG45-like domain containing protein	2.32
Qrob_T0152990.2		2.32
Qrob_T0170170.2	galactinol synthase 1-like	2.31
Qrob_T0479180.2	thaumatin-like protein 1	2.31
Qrob_T0607330.2	CBL-interacting serine/threonine-protein kinase 6-like	2.31
Qrob_T0463110.2		2.3
Qrob_T0358620.2	non-structural maintenance of chromosomes element 4 homolog A-like	2.3
Qrob_T0682200.2	germin-like protein subfamily 1 member 7	2.3
Qrob_T0593730.2		2.28
Qrob_T0481920.2	tropinone reductase homolog At2g29170-like	2.27
Qrob_T0497690.2	uncharacterized LOC115955198	2.27
Qrob_T0612630.2	3-hexulose-6-phosphate isomerase	2.27
Qrob_T0218950.2		2.27
Qrob_T0426520.2	18.1 kDa class I heat shock protein-like	2.25
Qrob_T0397930.2	probable acyl-activating enzyme 6	2.24
Qrob_T0573220.2	thiamine thiazole synthase, chloroplastic-like	2.24
Qrob_T0341120.2	peroxidase 5-like	2.24
Qrob_T0147350.2		2.24
Qrob_T0460290.2	homeobox protein SBH1-like, transcript variant X1	2.24
Qrob_T0236160.2		2.24
Qrob_T0481930.2	tropinone reductase homolog At1g07440-like, transcript variant X1	2.23
Qrob_T0418100.2	1-aminocyclopropane-1-carboxylate oxidase homolog 4-like	2.22
Qrob_T0495440.2	chaperone protein dnaJ 11, chloroplastic	2.22
Qrob_T0449750.2	26.5 kDa heat shock protein, mitochondrial, transcript variant X1	2.22
Qrob_T0033170.2	ethylene-responsive transcription factor ERF025-like	2.22
Qrob_T0017180.2	putative glycine-rich cell wall structural protein 1	2.19
Qrob_T0343750.2	agamous-like MADS-box protein AGL27, transcript variant X2	2.19
Qrob_T0410560.2	ent-kaurenoic acid oxidase 1-like, transcript variant X1	2.19
Qrob_T0309980.2	FCS-Like Zinc finger 17-like	2.19
Qrob_T0575520.2	cytochrome P450 76T24-like	2.18
Qrob_T0648880.2	alpha-amylase/subtilisin inhibitor-like	2.17
Qrob_T0158960.2	probable amidase At4g34880, transcript variant X1	2.17
Qrob_T0365770.2		2.16
Qrob_T0483590.2	calcineurin B-like protein 10, transcript variant X1	2.15
Qrob_T0398490.2	cytochrome P450 81Q32-like	2.14
Qrob_T0106760.2	organ-specific protein S2	2.14
Qrob_T0318610.2	protein BIG GRAIN 1-like B	2.13
Qrob_T0081840.2	(+)-neomenthol dehydrogenase-like	2.13
Qrob_T0025810.2		2.13
Qrob_T0004330.2	probable inositol transporter 2	2.12
Qrob_T0398460.2	cytochrome P450 81Q32-like	2.12
Qrob_T0148930.2	protein REVEILLE 7-like, transcript variant X1	2.11
Qrob_T0666340.2		2.11
Qrob_T0407390.2	thaumatin-like protein 1	2.1
Qrob_T0200200.2		2.1
Qrob_T0377180.2	ethylene-responsive transcription factor ERF061	2.1
Qrob_T0378010.2	probable glutathione S-transferase	2.1
Qrob_T0687300.2	scopoletin glucosyltransferase-like	2.1
Qrob_T0649090.2	flavonol sulfotransferase-like	2.1
Qrob_T0341210.2		2.1
Qrob_T0063890.2	BAG family molecular chaperone regulator 6	2.09
Qrob_T0371620.2	E3 ubiquitin-protein ligase RHA2A	2.09
Qrob_T0200590.2	cytochrome P450 CYP736A12-like	2.09
Qrob_T0324560.2	uncharacterized LOC115976035	2.09
Qrob_T0648310.2	cytochrome P450 CYP82D47-like	2.09
Qrob_T0401120.2		2.09
Qrob_T0296270.2	cold-shock protein CS120-like	2.09
Qrob_T0391670.2	protein LURP-one-related 10-like	2.08
Qrob_T0280290.2	cationic peroxidase 1-like	2.08
Qrob_T0746490.2	(-)-germacrene D synthase-like	2.08
Qrob_T0687410.2	nodulin-26-like	2.07
Qrob_T0301470.2	protein NRT1/ PTR FAMILY 2.11-like, transcript variant X1	2.06
Qrob_T0158030.2	auxin-responsive protein SAUR23-like	2.06
Qrob_T0318030.2	cytochrome P450 CYP82D47-like	2.05
Qrob_T0291700.2	auxin-induced protein 15A-like	2.05
Qrob_T0032020.2		2.05
Qrob_T0401020.2	aspartate, glycine, lysine and serine-rich protein-like, transcript variant X1	2.03
Qrob_T0370430.2		2.03
Qrob_T0180830.2		2.02
Qrob_T0004940.2	protein SULFUR DEFICIENCY-INDUCED 1, transcript variant X2	2.02
Qrob_T0451600.2	U-box domain-containing protein 33-like, transcript variant X2	2.02
Qrob_T0682350.2	polyphenol oxidase, chloroplastic-like, transcript variant X2	2.01
Qrob_T0162890.2	E3 ubiquitin-protein ligase MBR2-like, transcript variant X4	2.01
Qrob_T0098220.2	uncharacterized LOC115962737	2.01
Qrob_T0521120.2	uncharacterized LOC115989568	2.01
Qrob_T0594310.2	germin-like protein subfamily 1 member 13	2
Qrob_T0317500.2	chlorophyll a-b binding protein of LHCII type 1	2
Qrob_T0492530.2	pectinesterase	2
Qrob_T0275440.2	carboxylesterase 1-like	1.99
Qrob_T0219540.2	heat stress transcription factor C-1	1.99
Qrob_T0061720.2		1.99
Qrob_T0418630.2	glutathione transferase GST 23-like	1.99
Qrob_T0094590.2	transcription factor JUNGBRUNNEN 1-like	1.99
Qrob_T0686740.2	E4 SUMO-protein ligase PIAL2-like, transcript variant X1	1.99
Qrob_T0233460.2	pentatricopeptide repeat-containing protein At5g66520-like	1.99
Qrob_T0577300.2	tetraspanin-8-like	1.98
Qrob_T0492430.2	pleiotropic drug resistance protein 2-like, transcript variant X1	1.98
Qrob_T0541520.2	legumain, transcript variant X2	1.98
Qrob_T0002100.2		1.98
Qrob_T0430100.2	G-type lectin S-receptor-like serine/threonine-protein kinase LECRK4	1.97
Qrob_T0706240.2	G-type lectin S-receptor-like serine/threonine-protein kinase At4g27290, transcript variant X1	1.97
Qrob_T0577810.2	acetate/butyrate--CoA ligase AAE7, peroxisomal	1.96
Qrob_T0648270.2	cytochrome P450 CYP82D47-like	1.96
Qrob_T0285650.2	protein MODIFYING WALL LIGNIN-1-like	1.96
Qrob_T0200220.2	vitellogenin-2	1.96
Qrob_T0333360.2	2-alkenal reductase (NADP(+)-dependent)-like	1.96
Qrob_T0107230.2	uncharacterized LOC115971880	1.96
Qrob_T0194890.2	cytochrome P450 81E8-like	1.95
Qrob_T0423850.2	class V chitinase-like	1.95
Qrob_T0082080.2	20S-pre-rRNA D-site endonuclease nob1-like	1.95
Qrob_T0715430.2	uncharacterized protein At5g50100, chloroplastic, transcript variant X1	1.95
Qrob_T0170250.2	probable nucleoredoxin 1	1.94
Qrob_T0759390.2	glucan endo-1,3-beta-glucosidase 11-like	1.94
Qrob_T0333620.2	2-alkenal reductase (NADP(+)-dependent)-like	1.94
Qrob_T0252460.2	probable amino acid permease 7, transcript variant X5	1.94
Qrob_T0173250.2	uncharacterized LOC115974026	1.93
Qrob_T0322240.2	kunitz trypsin inhibitor 5-like	1.93
Qrob_T0398410.2	cytochrome P450 81C13-like	1.93
Qrob_T0087270.2	protein LNK3	1.92
Qrob_T0481890.2		1.92
Qrob_T0021880.2	leucine-rich repeat receptor-like serine/threonine-protein kinase At1g17230, transcript variant X2	1.92
Qrob_T0751360.2	CO(2)-response secreted protease-like	1.91
Qrob_T0247430.2	uncharacterized protein At1g28695-like	1.91
Qrob_T0387270.2	salicylate carboxymethyltransferase-like	1.91
Qrob_T0284490.2		1.91
Qrob_T0687390.2	aquaporin NIP1-2-like	1.9
Qrob_T0159310.2	crocetin glucosyltransferase, chloroplastic-like	1.9
Qrob_T0170610.2	abscisic acid 8'-hydroxylase 4	1.9
Qrob_T0186780.2	esterase-like, transcript variant X1	1.89
Qrob_T0736400.2	anthocyanidin 5,3-O-glucosyltransferase-like	1.89
Qrob_T0698120.2		1.89
Qrob_T0322630.2	hexose carrier protein HEX6-like	1.89
Qrob_T0594300.2	germin-like protein subfamily 1 member 14	1.88
Qrob_T0681550.2		1.87
Qrob_T0059040.2	protein NUCLEAR FUSION DEFECTIVE 4-like, transcript variant X1	1.87
Qrob_T0461220.2	germin-like protein subfamily 1 member 7	1.87
Qrob_T0126460.2	heme-binding protein 2	1.86
Qrob_T0104360.2	uncharacterized protein PHLOEM PROTEIN 2-LIKE A4-like	1.86
Qrob_T0030720.2	aldehyde dehydrogenase family 2 member B7, mitochondrial-like	1.86
Qrob_T0422260.2	peroxidase 5-like, transcript variant X1	1.86
Qrob_T0616060.2	early nodulin-75-like	1.85
Qrob_T0173120.2	ferredoxin	1.85
Qrob_T0273160.2	thioredoxin-like 4, chloroplastic, transcript variant X2	1.85
Qrob_T0648920.2	alpha-amylase/subtilisin inhibitor-like	1.84
Qrob_T0083070.2	zinc finger CCCH domain-containing protein 2-like	1.84
Qrob_T0252470.2	probable amino acid permease 7, transcript variant X5	1.84
Qrob_T0341090.2	peroxidase 5-like	1.84
Qrob_T0307510.2		1.83
Qrob_T0527770.2	uncharacterized LOC115977838	1.82
Qrob_T0594290.2	germin-like protein subfamily 1 member 14	1.82
Qrob_T0491740.2	inositol oxygenase 1-like	1.82
Qrob_T0223780.2	uncharacterized LOC115952553	1.82
Qrob_T0452180.2	myb-related protein 306	1.82
Qrob_T0557650.2	expansin-like B1	1.81
Qrob_T0159520.2	monothiol glutaredoxin-S2-like	1.81
Qrob_T0073230.2	WRKY transcription factor 28-like	1.8
Qrob_T0459030.2	uncharacterized LOC115963953, transcript variant X2	1.8
Qrob_T0487240.2	uncharacterized oxidoreductase At4g09670-like	1.8
Qrob_T0464040.2		1.8
Qrob_T0174460.2	thioredoxin X, chloroplastic-like	1.8
Qrob_T0415430.2	cytochrome P450 704C1-like, transcript variant X1	1.79
Qrob_T0172650.2	salicylic acid-binding protein 2-like	1.79
Qrob_T0257420.2		1.79
Qrob_T0632120.2	uncharacterized protein At4g08330, chloroplastic	1.79
Qrob_T0608160.2	uncharacterized LOC115985427	1.79
Qrob_T0661600.2		1.79
Qrob_T0292970.2	uncharacterized LOC115969647	1.79
Qrob_T0307520.2		1.79
Qrob_T0598350.2	lecithin-cholesterol acyltransferase-like 1	1.79
Qrob_T0090610.2	beta-fructofuranosidase, insoluble isoenzyme 1-like	1.78
Qrob_T0666730.2	ferredoxin--NADP reductase, leaf isozyme, chloroplastic-like	1.78
Qrob_T0380300.2	probable LRR receptor-like serine/threonine-protein kinase At1g56140, transcript variant X1	1.78
Qrob_T0206670.2	sorbitol dehydrogenase-like	1.77
Qrob_T0616470.2	3-hydroxybutyryl-CoA dehydrogenase	1.77
Qrob_T0005800.2	carbonic anhydrase 2-like	1.77
Qrob_T0477630.2	12S seed storage globulin 1-like	1.77
Qrob_T0472070.2		1.77
Qrob_T0033160.2	ethylene-responsive transcription factor ERF025-like	1.77
Qrob_T0173220.2	endochitinase-like	1.76
Qrob_T0076400.2	cyclic dof factor 2-like	1.76
Qrob_T0523980.2	glucan endo-1,3-beta-glucosidase 11-like	1.76
Qrob_T0162880.2	E3 ubiquitin-protein ligase MBR2-like, transcript variant X4	1.76
Qrob_T0524250.2	2-alkenal reductase (NADP(+)-dependent)-like	1.76
Qrob_T0485290.2	umecyanin-like	1.76
Qrob_T0173260.2	uncharacterized LOC115974026	1.75
Qrob_T0528660.2		1.75
Qrob_T0027750.2	cysteine proteinase inhibitor B	1.75
Qrob_T0590790.2	uncharacterized LOC115971193, transcript variant X2	1.75
Qrob_T0281790.2		1.75
Qrob_T0494010.2	ubiquitin carboxyl-terminal hydrolase 25	1.75
Qrob_T0612850.2	transcription factor MYB17-like	1.75
Qrob_T0202950.2	dehydrogenase/reductase SDR family member 12	1.74
Qrob_T0497750.2	vestitone reductase-like	1.74
Qrob_T0637950.2	UDP-glycosyltransferase 91A1-like	1.74
Qrob_T0181170.2	disease resistance protein RPM1-like, transcript variant X1	1.74
Qrob_T0013330.2	probable aldo-keto reductase 3, transcript variant X4	1.73
Qrob_T0212430.2	uncharacterized LOC115959093	1.73
Qrob_T0711880.2	uncharacterized LOC115964118, transcript variant X4	1.73
Qrob_T0187440.2		1.73
Qrob_T0338000.2	BRI1 kinase inhibitor 1	1.73
Qrob_T0514830.2	uncharacterized LOC115982631	1.72
Qrob_T0451590.2		1.72
Qrob_T0434970.2		1.72
Qrob_T0075420.2	L-type lectin-domain containing receptor kinase IX.1-like	1.72
Qrob_T0430170.2	peroxidase 3-like	1.72
Qrob_T0314110.2	1,2-dihydroxy-3-keto-5-methylthiopentene dioxygenase 1	1.72
Qrob_T0001810.2	germin-like protein subfamily 1 member 7	1.71
Qrob_T0482850.2	dormancy-associated protein homolog 3, transcript variant X3	1.71
Qrob_T0356770.2	uncharacterized LOC115977178	1.71
Qrob_T0427490.2	G-type lectin S-receptor-like serine/threonine-protein kinase RKS1, transcript variant X1	1.71
Qrob_T0004240.2	uncharacterized LOC115958187	1.71
Qrob_T0476460.2	probable protein phosphatase 2C 2	1.71
Qrob_T0598140.2	17.8 kDa class I heat shock protein-like	1.71
Qrob_T0531870.2	3-oxo-Delta(4,5)-steroid 5-beta-reductase-like	1.7
Qrob_T0142670.2	cyclic dof factor 3	1.7
Qrob_T0648300.2	cytochrome P450 CYP82D47-like	1.7
Qrob_T0025590.2	germin-like protein subfamily 1 member 11	1.7
Qrob_T0514280.2	protein SRG1-like	1.7
Qrob_T0125190.2	UDP-glycosyltransferase 71K1-like	1.7
Qrob_T0011280.2	putative late blight resistance protein homolog R1B-8	1.7
Qrob_T0424590.2	putative cyclic nucleotide-gated ion channel 8	1.7
Qrob_T0292960.2	cyclin-L1-1-like, transcript variant X5	1.7
Qrob_T0081750.2	protein P21-like	1.69
Qrob_T0570920.2	uncharacterized LOC115978880	1.69
Qrob_T0237200.2	uncharacterized LOC115982467, transcript variant X1	1.69
Qrob_T0194880.2	cytochrome P450 81E8-like	1.69
Qrob_T0638220.2	ELF3-like protein 2	1.69
Qrob_T0270110.2		1.69
Qrob_T0522150.2	probable aminotransferase TAT2, transcript variant X2	1.68
Qrob_T0265370.2	F-box/kelch-repeat protein At2g44130-like	1.68
Qrob_T0687660.2	auxin-responsive protein SAUR32-like	1.68
Qrob_T0014420.2	ethylene-responsive transcription factor ERF027-like	1.68
Qrob_T0582330.2		1.68
Qrob_T0702350.2		1.68
Qrob_T0689460.2	uncharacterized LOC115968269	1.67
Qrob_T0727770.2	transcription factor MYB1R1-like	1.67
Qrob_T0042560.2	protein YLS3-like	1.67
Qrob_T0558960.2	phytochrome A-associated F-box protein	1.66
Qrob_T0599030.2	mannan endo-1,4-beta-mannosidase 7-like	1.66
Qrob_T0011870.2	uncharacterized LOC115987471	1.66
Qrob_T0240530.2	uncharacterized LOC115952379	1.66
Qrob_T0699400.2		1.66
Qrob_T0216840.2	probable protein phosphatase 2C 13	1.65
Qrob_T0510490.2	F-box protein PP2-A13-like	1.65
Qrob_T0765250.2	B-box zinc finger protein 32-like	1.65
Qrob_T0708350.2		1.65
Qrob_T0517090.2		1.65
Qrob_T0405390.2		1.65
Qrob_T0303390.2		1.65
Qrob_T0191700.2	uncharacterized LOC115960256	1.64
Qrob_T0682160.2	germin-like protein subfamily 1 member 7	1.64
Qrob_T0176510.2	uncharacterized LOC115957285	1.64
Qrob_T0666840.2	uncharacterized LOC115965537	1.64
Qrob_T0466850.2	uncharacterized LOC115991871	1.63
Qrob_T0030780.2	U-box domain-containing protein 19	1.63
Qrob_T0248400.2	scarecrow-like protein 30	1.63
Qrob_T0598360.2	lecithin-cholesterol acyltransferase-like 1	1.63
Qrob_T0329620.2	lignin-forming anionic peroxidase-like	1.63
Qrob_T0089660.2	coatomer subunit beta'-1-like	1.63
Qrob_T0726010.2	protein PLASTID MOVEMENT IMPAIRED 1	1.63
Qrob_T0365050.2	zinc-finger homeodomain protein 9-like	1.63
Qrob_T0415530.2	cytochrome P450 76T24-like	1.63
Qrob_T0031860.2	uncharacterized LOC115989118	1.63
Qrob_T0126980.2	pathogenesis-related genes transcriptional activator PTI6-like	1.62
Qrob_T0391780.2	cryptochrome-1, transcript variant X2	1.62
Qrob_T0682220.2	germin-like protein subfamily 1 member 7	1.62
Qrob_T0019100.2	zinc finger protein CONSTANS-LIKE 13, transcript variant X2	1.62
Qrob_T0206680.2	L-idonate 5-dehydrogenase-like	1.61
Qrob_T0593860.2	uncharacterized LOC115968686	1.61
Qrob_T0236150.2		1.61
Qrob_T0084630.2	tRNA ligase 1, transcript variant X3	1.61
Qrob_T0321690.2	uncharacterized LOC115960166	1.61
Qrob_T0248980.2	oxygen-evolving enhancer protein 2, chloroplastic	1.6
Qrob_T0403110.2	germin-like protein subfamily 1 member 11	1.6
Qrob_T0008350.2		1.6
Qrob_T0226440.2	probable caffeoyl-CoA O-methyltransferase At4g26220	1.6
Qrob_T0082290.2	transcription factor MYB108	1.6
Qrob_T0090550.2		1.6
Qrob_T0017250.2		1.6
Qrob_T0010520.2	uncharacterized LOC115979449, transcript variant X2	1.6
Qrob_T0460850.2	ribosome maturation protein SBDS	1.59
Qrob_T0480560.2	glutathione S-transferase U19-like	1.59
Qrob_T0159300.2	crocetin glucosyltransferase, chloroplastic-like	1.59
Qrob_T0590770.2	uncharacterized LOC115971193, transcript variant X3	1.59
Qrob_T0687330.2		1.59
Qrob_T0482790.2	60S ribosomal protein L22-2	1.59
Qrob_T0236890.2	cinnamoyl-CoA reductase 1	1.58
Qrob_T0663630.2	germin-like protein subfamily 1 member 7	1.58
Qrob_T0013140.2	dynein light chain 1, cytoplasmic-like	1.58
Qrob_T0346140.2	E3 ubiquitin-protein ligase RHA2B-like	1.58
Qrob_T0172930.2	cytochrome P450 CYP82D47-like	1.58
Qrob_T0460920.2	basic form of pathogenesis-related protein 1-like	1.58
Qrob_T0392270.2	loganic acid O-methyltransferase-like	1.58
Qrob_T0113990.2	4-coumarate--CoA ligase-like 9	1.58
Qrob_T0655330.2		1.58
Qrob_T0333590.2	2-alkenal reductase (NADP(+)-dependent)-like	1.58
Qrob_T0281150.2	transcription factor MYBS3-like	1.58
Qrob_T0463120.2	uncharacterized LOC115982950	1.57
Qrob_T0118980.2	cysteine-rich receptor-like protein kinase 10	1.57
Qrob_T0323550.2		1.57
Qrob_T0573380.2		1.56
Qrob_T0249030.2		1.56
Qrob_T0053020.2		1.56
Qrob_T0336020.2	RPM1-interacting protein 4-like	1.56
Qrob_T0514370.2		1.56
Qrob_T0127820.2	F-box/LRR-repeat protein 12	1.55
Qrob_T0495120.2	tropinone reductase-like 3	1.55
Qrob_T0247190.2	UDP-glycosyltransferase 87A2-like	1.55
Qrob_T0427580.2	G-type lectin S-receptor-like serine/threonine-protein kinase RKS1, transcript variant X1	1.55
Qrob_T0041360.2	universal stress protein PHOS32-like	1.55
Qrob_T0404610.2	thylakoid lumenal 17.4 kDa protein, chloroplastic	1.55
Qrob_T0434350.2	epsin-2-like	1.55
Qrob_T0241800.2	acid phosphatase 1, transcript variant X1	1.55
Qrob_T0347790.2	probable purine permease 4	1.55
Qrob_T0542120.2	monoacylglycerol lipase	1.54
Qrob_T0219430.2		1.54
Qrob_T0660310.2	abscisic acid 8'-hydroxylase 2	1.54
Qrob_T0580420.2	oxygen-evolving enhancer protein 1, chloroplastic	1.54
Qrob_T0507360.2	magnesium-chelatase subunit ChlH, chloroplastic, transcript variant X2	1.54
Qrob_T0151730.2	glutathione S-transferase-like	1.54
Qrob_T0245600.2	disease resistance protein RGA2-like, transcript variant X5	1.54
Qrob_T0146510.2		1.54
Qrob_T0050070.2	potassium channel SKOR-like, transcript variant X6	1.54
Qrob_T0336410.2		1.54
Qrob_T0407340.2		1.53
Qrob_T0033670.2	O-glucosyltransferase rumi homolog, transcript variant X1	1.53
Qrob_T0352050.2	tubulin beta chain-like	1.53
Qrob_T0497760.2		1.53
Qrob_T0089870.2	chorismate mutase 2-like	1.53
Qrob_T0371730.2	putative zinc finger protein At1g68190, transcript variant X3	1.53
Qrob_T0098800.2	cytochrome P450 CYP736A12-like	1.53
Qrob_T0436010.2	uncharacterized LOC115957257, transcript variant X1	1.53
Qrob_T0464940.2	anthocyanidin 3-O-glucosyltransferase 5-like	1.53
Qrob_T0629550.2	uncharacterized LOC115994104	1.53
Qrob_T0616580.2	auxin-repressed 12.5 kDa protein-like	1.52
Qrob_T0418620.2		1.52
Qrob_T0508710.2	uncharacterized LOC115983408	1.52
Qrob_T0652060.2	transcription factor PHYTOCHROME INTERACTING FACTOR-LIKE 15-like	1.52
Qrob_T0170410.2	TMV resistance protein N-like	1.52
Qrob_T0608750.2	protein DJ-1 homolog B, transcript variant X1	1.51
Qrob_T0182110.2	dirigent protein 5-like	1.51
Qrob_T0112060.2	hypersensitive-induced response protein 1-like	1.51
Qrob_T0532990.2	protein BRASSINAZOLE-RESISTANT 1-like	1.51
Qrob_T0124040.2	heat stress transcription factor A-1b, transcript variant X5	1.51
Qrob_T0206780.2	transcription factor TCP19	1.51
Qrob_T0057990.2	probable E3 ubiquitin-protein ligase RNF217	1.51
Qrob_T0210810.2	LEAF RUST 10 DISEASE-RESISTANCE LOCUS RECEPTOR-LIKE PROTEIN KINASE-like 1.2	1.51
Qrob_T0092770.2	CBBY-like protein, transcript variant X2	1.51
Qrob_T0111510.2	YTH domain-containing protein ECT4-like, transcript variant X1	1.5
Qrob_T0361030.2	uncharacterized LOC115965520	1.5
Qrob_T0265790.2	L-ascorbate peroxidase, cytosolic, transcript variant X2	1.5
Qrob_T0422130.2	NAC domain containing protein 50-like, transcript variant X1	1.5
Qrob_T0463690.2		1.5
Qrob_T0481950.2	tropinone reductase homolog At2g29150-like	1.5
Qrob_T0691610.2	laccase-15-like	1.5
Qrob_T0226710.2		1.5
Qrob_T0173370.2	receptor-like protein 7	1.5
Qrob_T0388920.2		1.5
Qrob_T0081890.2	salutaridine reductase-like, transcript variant X2	1.5
Qrob_T0026620.2	cytochrome P450 89A2-like	1.5
Qrob_T0578380.2	auxin-responsive protein SAUR36-like	1.49
Qrob_T0236610.2		1.49
Qrob_T0261020.2	protein REVEILLE 8, transcript variant X1	1.49
Qrob_T0280580.2		1.49
Qrob_T0273140.2	cold-regulated protein 27	1.49
Qrob_T0287330.2	transcription factor UNE10	1.49
Qrob_T0502890.2	beta-fructofuranosidase, insoluble isoenzyme CWINV3-like	1.49
Qrob_T0557660.2	expansin-like B1	1.48
Qrob_T0683610.2	uncharacterized LOC115988631	1.48
Qrob_T0310410.2	chaperone protein DnaJ-like, transcript variant X2	1.48
Qrob_T0656500.2	probable serine/threonine-protein kinase WNK11, transcript variant X2	1.48
Qrob_T0381350.2		1.48
Qrob_T0317460.2	WRKY transcription factor 71-like, transcript variant X1	1.48
Qrob_T0072590.2	G-type lectin S-receptor-like serine/threonine-protein kinase At4g27290	1.48
Qrob_T0514510.2	protein SRG1-like	1.48
Qrob_T0676310.2	uncharacterized LOC115977802	1.48
Qrob_T0176100.2		1.48
Qrob_T0283030.2		1.48
Qrob_T0573250.2	protein translation factor SUI1 homolog 1	1.47
Qrob_T0438250.2	5'-adenylylsulfate reductase 3, chloroplastic-like	1.47
Qrob_T0047280.2	dof zinc finger protein DOF5.6	1.47
Qrob_T0461210.2	germin-like protein subfamily 1 member 7	1.47
Qrob_T0473050.2	N-acylneuraminate-9-phosphatase	1.47
Qrob_T0524140.2	2-alkenal reductase (NADP(+)-dependent)-like	1.47
Qrob_T0014410.2	ethylene-responsive transcription factor ERF024-like	1.47
Qrob_T0564200.2	uncharacterized protein At2g34460, chloroplastic, transcript variant X1	1.47
Qrob_T0622870.2	UDP-glycosyltransferase 89A2-like, transcript variant X2	1.47
Qrob_T0173020.2	uncharacterized LOC115995020, transcript variant X3	1.47
Qrob_T0041250.2	GTP-binding protein SAR1A	1.47
Qrob_T0288870.2	scarecrow-like protein 21, transcript variant X4	1.46
Qrob_T0714480.2	enoyl-CoA delta isomerase 1, peroxisomal-like	1.46
Qrob_T0126930.2	root phototropism protein 2	1.46
Qrob_T0366580.2	endoribonuclease Dicer homolog 1-like	1.46
Qrob_T0196320.2		1.46
Qrob_T0369990.2	(-)-isopiperitenol/(-)-carveol dehydrogenase, mitochondrial-like	1.46
Qrob_T0638570.2	probable flavin-containing monooxygenase 1	1.46
Qrob_T0153980.2	pectinesterase 2-like	1.46
Qrob_T0116150.2	protein DMR6-LIKE OXYGENASE 2-like	1.46
Qrob_T0389480.2		1.46
Qrob_T0707900.2	thiol protease aleurain-like	1.45
Qrob_T0456480.2	ethylene-responsive transcription factor ERF113-like	1.45
Qrob_T0318310.2	cytochrome P450 CYP82D47-like	1.45
Qrob_T0304160.2	uncharacterized LOC115957959	1.45
Qrob_T0210340.2	protein DETOXIFICATION 27-like	1.45
Qrob_T0063920.2		1.45
Qrob_T0762220.2	R3H domain-containing protein 1	1.44
Qrob_T0694590.2	putative 4-hydroxy-4-methyl-2-oxoglutarate aldolase 3, transcript variant X2	1.44
Qrob_T0010770.2	allene oxide synthase 3-like	1.44
Qrob_T0730700.2	patatin-like protein 2, transcript variant X1	1.44
Qrob_T0714920.2	NAC domain-containing protein 2-like	1.44
Qrob_T0180510.2		1.44
Qrob_T0371360.2	uncharacterized LOC115964300	1.44
Qrob_T0363040.2	gibberellic acid methyltransferase 2-like, transcript variant X1	1.44
Qrob_T0111170.2	uncharacterized LOC115977763	1.44
Qrob_T0654090.2		1.43
Qrob_T0302530.2	uncharacterized LOC115971817	1.43
Qrob_T0221180.2	uncharacterized LOC115964208	1.43
Qrob_T0068730.2	dof zinc finger protein DOF3.2-like	1.43
Qrob_T0723200.2	ABC transporter G family member 10, transcript variant X1	1.43
Qrob_T0710390.2	uncharacterized LOC115969880	1.42
Qrob_T0161430.2		1.42
Qrob_T0060070.2	ethylene-responsive transcription factor RAP2-1-like	1.42
Qrob_T0020670.2		1.42
Qrob_T0538510.2	basic blue protein-like	1.42
Qrob_T0238620.2	protein STRICTOSIDINE SYNTHASE-LIKE 5-like	1.42
Qrob_T0131370.2	uncharacterized LOC115953421	1.42
Qrob_T0179000.2	uncharacterized LOC115982135	1.42
Qrob_T0449970.2	2-alkenal reductase (NADP(+)-dependent)-like	1.42
Qrob_T0341030.2	peroxidase 5-like	1.42
Qrob_T0739260.2	putative E3 ubiquitin-protein ligase XBAT31	1.41
Qrob_T0278970.2	homocysteine S-methyltransferase 3	1.41
Qrob_T0576710.2	metallothionein-like protein type 2	1.41
Qrob_T0536510.2	germin-like protein subfamily 1 member 7	1.41
Qrob_T0480510.2	uncharacterized membrane protein At3g27390, transcript variant X1	1.41
Qrob_T0356540.2	protochlorophyllide-dependent translocon component 52, chloroplastic-like	1.41
Qrob_T0164850.2		1.41
Qrob_T0596260.2		1.41
Qrob_T0121350.2		1.41
Qrob_T0134440.2		1.41
Qrob_T0103110.2	large ribosomal RNA subunit accumulation protein YCED homolog 1, chloroplastic	1.41
Qrob_T0722860.2	polyubiquitin-like	1.4
Qrob_T0038800.2	zinc finger A20 and AN1 domain-containing stress-associated protein 8-like	1.4
Qrob_T0094090.2	F-box protein At1g67340-like	1.4
Qrob_T0294450.2	zinc finger CCCH domain-containing protein 1-like	1.4
Qrob_T0112590.2	heat shock factor protein HSF8	1.4
Qrob_T0600180.2		1.4
Qrob_T0407220.2	thaumatin-like protein 1	1.39
Qrob_T0415920.2	F-box only protein 6	1.39
Qrob_T0665420.2	protein PHLOEM PROTEIN 2-LIKE A10-like	1.39
Qrob_T0131630.2	ubiquitin-conjugating enzyme E2 11-like	1.39
Qrob_T0459230.2	ethylene-responsive transcription factor ERF113, transcript variant X1	1.39
Qrob_T0674270.2	homeobox protein BEL1 homolog	1.39
Qrob_T0564040.2	patatin-like protein 2	1.39
Qrob_T0611050.2		1.39
Qrob_T0369760.2	cytochrome P450 94A2-like	1.39
Qrob_T0452550.2		1.39
Qrob_T0275600.2	S-adenosylmethionine decarboxylase proenzyme-like	1.38
Qrob_T0473900.2	dormancy-associated protein homolog 3, transcript variant X1	1.38
Qrob_T0299770.2		1.38
Qrob_T0318020.2	cytochrome P450 CYP82D47-like	1.38
Qrob_T0238390.2	ganglioside-induced differentiation-associated protein 2	1.38
Qrob_T0206750.2		1.38
Qrob_T0533430.2	B-box zinc finger protein 19-like	1.38
Qrob_T0115240.2	NAC domain-containing protein 92, transcript variant X2	1.38
Qrob_T0456880.2	F-box/kelch-repeat protein At3g61590-like	1.38
Qrob_T0541750.2	geraniol 8-hydroxylase-like	1.38
Qrob_T0246700.2	protein PHYTOCHROME KINASE SUBSTRATE 1-like	1.38
Qrob_T0333330.2	2-alkenal reductase (NADP(+)-dependent)-like	1.38
Qrob_T0455750.2	uncharacterized LOC115960771	1.37
Qrob_T0700790.2	glutathione S-transferase U19-like	1.37
Qrob_T0178280.2	methionine gamma-lyase	1.37
Qrob_T0303000.2	cytochrome P450 CYP72A219-like	1.37
Qrob_T0048390.2	peroxidase 10-like	1.37
Qrob_T0657550.2	bidirectional sugar transporter SWEET12-like	1.37
Qrob_T0341580.2		1.37
Qrob_T0483750.2	protein NRT1/ PTR FAMILY 6.1	1.37
Qrob_T0527870.2	uncharacterized LOC115951207	1.37
Qrob_T0155860.2		1.37
Qrob_T0670310.2	glutathione S-transferase U10-like	1.36
Qrob_T0304130.2	uncharacterized LOC115957958	1.36
Qrob_T0687800.2	probable glutathione peroxidase 8	1.36
Qrob_T0176070.2		1.36
Qrob_T0062770.2		1.36
Qrob_T0602810.2	probable WRKY transcription factor 69	1.36
Qrob_T0144860.2	uncharacterized LOC115971004	1.36
Qrob_T0736490.2	RNA polymerase sigma factor sigC, transcript variant X1	1.36
Qrob_T0038520.2		1.36
Qrob_T0273240.2		1.36
Qrob_T0446580.2	uncharacterized LOC115954809	1.36
Qrob_T0072770.2	zinc finger protein CONSTANS-LIKE 3, transcript variant X1	1.35
Qrob_T0589320.2	scarecrow-like protein 32	1.35
Qrob_T0752030.2	cysteine-rich repeat secretory protein 38-like	1.35
Qrob_T0010670.2	protein JINGUBANG-like	1.35
Qrob_T0070290.2	germin-like protein subfamily T member 2	1.35
Qrob_T0706970.2		1.35
Qrob_T0492800.2	germin-like protein subfamily 1 member 14	1.35
Qrob_T0689050.2	uncharacterized LOC115969648	1.35
Qrob_T0706980.2		1.35
Qrob_T0131320.2	BEL1-like homeodomain protein 1, transcript variant X3	1.34
Qrob_T0593740.2		1.34
Qrob_T0123140.2	uncharacterized LOC115976941	1.34
Qrob_T0327850.2	uncharacterized LOC115954044	1.34
Qrob_T0522790.2	mitogen-activated protein kinase kinase kinase 18-like	1.34
Qrob_T0111360.2		1.34
Qrob_T0247900.2	MACPF domain-containing protein At1g14780-like	1.34
Qrob_T0034300.2	pentatricopeptide repeat-containing protein At4g01030, mitochondrial	1.34
Qrob_T0372640.2	receptor-like protein EIX2	1.34
Qrob_T0280100.2	superoxide dismutase [Mn], mitochondrial-like	1.34
Qrob_T0216710.2	uncharacterized LOC115995017, transcript variant X2	1.34
Qrob_T0480650.2	zinc finger protein CONSTANS-LIKE 9, transcript variant X3	1.33
Qrob_T0058520.2		1.33
Qrob_T0266770.2	cationic amino acid transporter 7, chloroplastic	1.33
Qrob_T0766310.2	uncharacterized LOC115977073	1.33
Qrob_T0069180.2	uncharacterized LOC115989314	1.33
Qrob_T0353480.2	probable isoprenylcysteine alpha-carbonyl methylesterase ICMEL1	1.33
Qrob_T0335140.2	F-box/kelch-repeat protein At3g23880-like	1.33
Qrob_T0579180.2	BRI1 kinase inhibitor 1	1.33
Qrob_T0120690.2	uncharacterized LOC115975264	1.33
Qrob_T0595730.2	molybdopterin biosynthesis protein CNX1, transcript variant X3	1.33
Qrob_T0717700.2	uncharacterized LOC115955770	1.33
Qrob_T0409730.2	protein MOS2-like	1.32
Qrob_T0108420.2	transcription factor MYB59	1.32
Qrob_T0707850.2	uncharacterized LOC115967292	1.32
Qrob_T0555280.2	protein SMAX1-LIKE 6-like	1.32
Qrob_T0288720.2	crocetin glucosyltransferase, chloroplastic-like	1.32
Qrob_T0397110.2	WRKY transcription factor 6-like	1.32
Qrob_T0253780.2		1.32
Qrob_T0584930.2	putative F-box protein At1g49610	1.32
Qrob_T0017270.2		1.32
Qrob_T0202480.2		1.32
Qrob_T0746600.2	uncharacterized LOC115978064	1.32
Qrob_T0724940.2	probable disease resistance protein At4g27220	1.32
Qrob_T0655960.2	cytochrome P450 704C1-like	1.32
Qrob_T0297850.2	uncharacterized LOC115977824	1.32
Qrob_T0204450.2	mechanosensitive ion channel protein 6-like	1.32
Qrob_T0202320.2	NAC domain-containing protein 1	1.31
Qrob_T0624250.2	uncharacterized protein At1g01500, transcript variant X3	1.31
Qrob_T0246310.2		1.31
Qrob_T0412000.2	probable cinnamyl alcohol dehydrogenase 1	1.31
Qrob_T0066990.2	F-box protein SKIP28-like	1.31
Qrob_T0057860.2		1.31
Qrob_T0643780.2	uncharacterized LOC115952359	1.31
Qrob_T0681470.2	glucan endo-1,3-beta-glucosidase, basic vacuolar isoform-like	1.3
Qrob_T0428020.2	eukaryotic peptide chain release factor subunit 1-3-like, transcript variant X2	1.3
Qrob_T0595280.2	50S ribosomal protein L1, chloroplastic	1.3
Qrob_T0625220.2	protein CHUP1, chloroplastic-like, transcript variant X4	1.3
Qrob_T0262240.2	protein DMP2-like	1.3
Qrob_T0536490.2	germin-like protein subfamily 1 member 7	1.3
Qrob_T0394110.2	zinc finger protein WIP3	1.3
Qrob_T0115630.2	transcription repressor MYB5-like	1.3
Qrob_T0036690.2	cysteine proteinase 15A-like	1.29
Qrob_T0544800.2	probable mannitol dehydrogenase	1.29
Qrob_T0379650.2	transcription factor MYB24	1.29
Qrob_T0463850.2	amino acid permease 3-like	1.29
Qrob_T0215170.2		1.29
Qrob_T0208530.2	thioredoxin reductase NTRB-like, transcript variant X5	1.29
Qrob_T0705440.2		1.29
Qrob_T0545220.2	plastid-lipid-associated protein, chloroplastic-like	1.28
Qrob_T0228200.2		1.28
Qrob_T0437660.2	LOB domain-containing protein 1-like	1.28
Qrob_T0485330.2	umecyanin-like	1.28
Qrob_T0247710.2	uncharacterized LOC115982014	1.28
Qrob_T0437610.2	pyridoxine/pyridoxamine 5'-phosphate oxidase 2	1.28
Qrob_T0544170.2	2-oxoisovalerate dehydrogenase subunit alpha 2, mitochondrial-like	1.28
Qrob_T0050900.2	stachyose synthase-like	1.28
Qrob_T0756140.2	probable transcription factor At1g11510	1.28
Qrob_T0260920.2	two-component response regulator-like APRR3	1.27
Qrob_T0347950.2	amidase 1-like, transcript variant X1	1.27
Qrob_T0186940.2	uncharacterized LOC115991720	1.27
Qrob_T0349710.2	endochitinase 2-like	1.26
Qrob_T0087000.2	ERI1 exoribonuclease 2-like	1.26
Qrob_T0237310.2	plant intracellular Ras-group-related LRR protein 3-like	1.26
Qrob_T0628650.2	probable low-specificity L-threonine aldolase 1, transcript variant X3	1.26
Qrob_T0040750.2	endochitinase EP3-like	1.26
Qrob_T0116130.2	protein DMR6-LIKE OXYGENASE 2-like	1.26
Qrob_T0309300.2		1.26
Qrob_T0059050.2	uncharacterized LOC115964137	1.26
Qrob_T0135780.2	plasmodesmata-located protein 1, transcript variant X2	1.26
Qrob_T0191080.2	cytochrome P450 CYP82D47-like	1.25
Qrob_T0459220.2	mitochondrial import inner membrane translocase subunit PAM16 like 2	1.25
Qrob_T0119080.2	thioredoxin-like protein CXXS1	1.25
Qrob_T0412680.2		1.25
Qrob_T0265740.2	D-lactate dehydrogenase [cytochrome], mitochondrial-like	1.25
Qrob_T0088650.2	heat stress transcription factor A-3, transcript variant X1	1.25
Qrob_T0461770.2		1.25
Qrob_T0200120.2		1.25
Qrob_T0646680.2	dr1-associated corepressor-like	1.25
Qrob_T0225690.2	triacylglycerol lipase SDP1	1.24
Qrob_T0178170.2	metal-nicotianamine transporter YSL1, transcript variant X2	1.24
Qrob_T0176250.2	protein DETOXIFICATION 18-like	1.24
Qrob_T0047240.2	probable boron transporter 2	1.24
Qrob_T0429990.2	heat shock 70 kDa protein 8	1.24
Qrob_T0362830.2	E3 ubiquitin-protein ligase BRE1-like 2, transcript variant X4	1.24
Qrob_T0216650.2	solute carrier family 25 member 44-like, transcript variant X1	1.24
Qrob_T0021870.2	MDIS1-interacting receptor like kinase 2-like	1.24
Qrob_T0283320.2	trihelix transcription factor GT-2-like	1.23
Qrob_T0206660.2	sorbitol dehydrogenase, transcript variant X2	1.23
Qrob_T0173060.2	thioredoxin-like protein HCF164, chloroplastic	1.23
Qrob_T0333700.2	2-alkenal reductase (NADP(+)-dependent)-like	1.23
Qrob_T0752140.2	cytochrome P450 76T24-like	1.23
Qrob_T0033310.2	(+)-neomenthol dehydrogenase-like	1.23
Qrob_T0448440.2	probable protein phosphatase 2C 33, transcript variant X1	1.22
Qrob_T0354930.2	gibberellin receptor GID1C-like	1.22
Qrob_T0462100.2	zinc finger protein CONSTANS-LIKE 5	1.22
Qrob_T0434170.2	expansin-A4-like	1.22
Qrob_T0280180.2	uncharacterized LOC115984802	1.22
Qrob_T0438410.2	universal stress protein PHOS32-like, transcript variant X2	1.22
Qrob_T0374670.2	cellulose synthase-like protein G3	1.22
Qrob_T0197930.2	uncharacterized protein At1g76070	1.22
Qrob_T0536250.2	cytochrome P450 78A5-like	1.22
Qrob_T0187850.2	ABSCISIC ACID-INSENSITIVE 5-like protein 2, transcript variant X1	1.22
Qrob_T0542830.2	GDSL esterase/lipase 1-like	1.22
Qrob_T0193540.2	protein RRNAD1, transcript variant X8	1.22
Qrob_T0632390.2	protein FAR1-RELATED SEQUENCE 5-like	1.22
Qrob_T0487490.2		1.22
Qrob_T0338700.2	protein MKS1	1.21
Qrob_T0287020.2	acyl-coenzyme A thioesterase 13-like	1.21
Qrob_T0516240.2	sugar transport protein 7-like	1.21
Qrob_T0606800.2	cytochrome P450 71A9-like	1.21
Qrob_T0748900.2	uncharacterized LOC115950977, transcript variant X2	1.21
Qrob_T0635730.2	RNA pseudouridine synthase 6, chloroplastic, transcript variant X5	1.21
Qrob_T0556900.2	protein DETOXIFICATION 16-like	1.2
Qrob_T0477470.2	uncharacterized LOC115968924	1.2
Qrob_T0461690.2	E3 ubiquitin-protein ligase KEG-like	1.2
Qrob_T0495650.2	uncharacterized LOC115992995	1.2
Qrob_T0313650.2	ADP-ribosylation factor-like protein 5	1.2
Qrob_T0653140.2		1.2
Qrob_T0178520.2	hexokinase-1-like	1.19
Qrob_T0500140.2	uncharacterized LOC115982017	1.19
Qrob_T0407400.2	thaumatin-like protein 1	1.19
Qrob_T0711450.2	uncharacterized LOC115968804	1.19
Qrob_T0703800.2	scopoletin glucosyltransferase-like	1.19
Qrob_T0641330.2	translocase of chloroplast 159, chloroplastic	1.19
Qrob_T0461340.2	protein SPA1-RELATED 2, transcript variant X2	1.19
Qrob_T0130930.2		1.19
Qrob_T0103390.2	metal tolerance protein 9-like	1.19
Qrob_T0226450.2	probable caffeoyl-CoA O-methyltransferase At4g26220	1.19
Qrob_T0181370.2	actin cytoskeleton-regulatory complex protein PAN1, transcript variant X3	1.19
Qrob_T0432870.2	J domain-containing protein required for chloroplast accumulation response 1-like, transcript variant X1	1.19
Qrob_T0386300.2	pentatricopeptide repeat-containing protein At5g55840, transcript variant X2	1.19
Qrob_T0033620.2	O-glucosyltransferase rumi homolog	1.18
Qrob_T0390650.2	transcription initiation factor IIB-like	1.18
Qrob_T0307910.2	probable 3-hydroxyisobutyrate dehydrogenase-like 1, mitochondrial	1.18
Qrob_T0096820.2	uncharacterized LOC115995176	1.18
Qrob_T0382640.2	ATPase WRNIP1-like	1.18
Qrob_T0355890.2	uncharacterized LOC115963004, transcript variant X2	1.18
Qrob_T0437240.2	vacuolar iron transporter homolog 1-like	1.18
Qrob_T0401850.2		1.18
Qrob_T0214090.2	IAA-amino acid hydrolase ILR1-like 3	1.18
Qrob_T0361720.2	polyubiquitin-like	1.17
Qrob_T0080450.2	transcription factor KUA1	1.17
Qrob_T0434790.2	ethylene-responsive transcription factor RAP2-3	1.17
Qrob_T0565010.2	NAC domain-containing protein JA2L	1.17
Qrob_T0714460.2	ACT domain-containing protein ACR9	1.17
Qrob_T0183930.2	potassium channel SKOR	1.17
Qrob_T0253640.2	probable leucine-rich repeat receptor-like serine/threonine-protein kinase At3g14840	1.17
Qrob_T0361120.2	uncharacterized LOC115965502, transcript variant X2	1.17
Qrob_T0338640.2	glycolipid transfer protein 3	1.17
Qrob_T0333610.2		1.17
Qrob_T0303600.2	basic leucine zipper 43	1.17
Qrob_T0090670.2	1-aminocyclopropane-1-carboxylate oxidase homolog 1-like	1.17
Qrob_T0147260.2	dnaJ protein homolog, transcript variant X2	1.16
Qrob_T0413190.2	uncharacterized LOC115972036	1.16
Qrob_T0403410.2	cytochrome P450 CYP82D47-like	1.16
Qrob_T0305710.2		1.16
Qrob_T0307580.2	probable NAD(P)H dehydrogenase (quinone) FQR1-like 3	1.16
Qrob_T0202230.2	probable aldo-keto reductase 2	1.16
Qrob_T0154010.2	pectinesterase 2-like	1.16
Qrob_T0612260.2	transcription factor RAX3-like	1.16
Qrob_T0536500.2		1.16
Qrob_T0132530.2		1.16
Qrob_T0094520.2	protein WHAT'S THIS FACTOR 1 homolog, chloroplastic, transcript variant X1	1.16
Qrob_T0556100.2	protein SUPPRESSOR OF npr1-1, CONSTITUTIVE 1-like, transcript variant X2	1.16
Qrob_T0122090.2	F-box/kelch-repeat protein At3g23880-like	1.16
Qrob_T0131590.2	uncharacterized LOC115956244	1.15
Qrob_T0405710.2	topless-related protein 1-like	1.15
Qrob_T0267970.2	BOI-related E3 ubiquitin-protein ligase 1-like	1.15
Qrob_T0663640.2	germin-like protein subfamily 1 member 7	1.15
Qrob_T0678220.2	uncharacterized LOC115994724, transcript variant X2	1.15
Qrob_T0278580.2	FGGY carbohydrate kinase domain-containing protein, transcript variant X2	1.15
Qrob_T0222900.2	homeobox protein knotted-1-like 3, transcript variant X4	1.15
Qrob_T0655610.2	tubby-like F-box protein 7, transcript variant X2	1.15
Qrob_T0030680.2	uncharacterized LOC115981662	1.15
Qrob_T0760430.2	uncharacterized protein At5g39570	1.15
Qrob_T0665450.2	thioredoxin-like protein AAED1, chloroplastic	1.15
Qrob_T0339700.2	F-box protein At3g56470-like, transcript variant X2	1.15
Qrob_T0147290.2	RING-H2 finger protein ATL70-like	1.15
Qrob_T0531920.2	uncharacterized LOC115966727	1.15
Qrob_T0264760.2	protein tesmin/TSO1-like CXC 5	1.15
Qrob_T0155940.2	ubiquitin carboxyl-terminal hydrolase 25	1.15
Qrob_T0432100.2	UDP-glycosyltransferase 92A1-like	1.15
Qrob_T0070980.2	ubiquitin carboxyl-terminal hydrolase 23	1.14
Qrob_T0507200.2	epoxide hydrolase A-like	1.14
Qrob_T0030590.2		1.14
Qrob_T0503640.2	carboxylesterase 1-like	1.14
Qrob_T0489110.2	uncharacterized LOC115972271, transcript variant X1	1.14
Qrob_T0001420.2	F-box protein At4g18380-like	1.14
Qrob_T0373090.2		1.14
Qrob_T0598100.2	nuclear-pore anchor, transcript variant X1	1.14
Qrob_T0270780.2	uncharacterized LOC115981245, transcript variant X7	1.14
Qrob_T0338570.2	pathogen-related protein-like	1.13
Qrob_T0521310.2	dihydropyrimidinase-like	1.13
Qrob_T0071180.2	transcription factor bHLH66	1.13
Qrob_T0247540.2	receptor protein kinase TMK1-like	1.13
Qrob_T0442280.2	F-box protein SKIP22-like	1.13
Qrob_T0248270.2	scarecrow-like protein 33	1.13
Qrob_T0260910.2	two-component response regulator-like APRR3	1.13
Qrob_T0085660.2	beta-fructofuranosidase, insoluble isoenzyme CWINV1-like	1.13
Qrob_T0532640.2	senescence-associated protein AAF, chlorolplastic-like, transcript variant X2	1.13
Qrob_T0248910.2	probable WRKY transcription factor 74	1.13
Qrob_T0326480.2	uncharacterized protein ycf36	1.13
Qrob_T0594070.2	autophagy-related protein 13a, transcript variant X3	1.12
Qrob_T0059850.2	F-box protein At1g47056-like	1.12
Qrob_T0276460.2	U-box domain-containing protein 9	1.12
Qrob_T0070280.2	germin-like protein subfamily T member 2	1.12
Qrob_T0057430.2	zinc finger protein 5-like, transcript variant X2	1.12
Qrob_T0461350.2	protein SPA1-RELATED 2, transcript variant X1	1.12
Qrob_T0666640.2	uncharacterized LOC115977735	1.12
Qrob_T0280770.2	AT-hook motif nuclear-localized protein 20-like	1.12
Qrob_T0403400.2	cytochrome P450 CYP82D47-like	1.11
Qrob_T0608680.2	epidermis-specific secreted glycoprotein EP1-like	1.11
Qrob_T0533020.2	anthocyanidin 3-O-glucosyltransferase 5-like	1.11
Qrob_T0275920.2	uncharacterized LOC115968781	1.11
Qrob_T0651790.2	uncharacterized LOC115981704	1.11
Qrob_T0371080.2	NADPH-dependent aldehyde reductase-like protein, chloroplastic	1.11
Qrob_T0042490.2	GTP 3',8-cyclase, mitochondrial	1.11
Qrob_T0628490.2	probable LRR receptor-like serine/threonine-protein kinase At1g74360	1.11
Qrob_T0210170.2	bifunctional riboflavin biosynthesis protein RIBA 1, chloroplastic-like, transcript variant X1	1.11
Qrob_T0412600.2	protein THYLAKOID ASSEMBLY 8, chloroplastic-like	1.11
Qrob_T0125160.2	F-box protein At3g07870-like	1.11
Qrob_T0144520.2	probable xyloglucan endotransglucosylase/hydrolase protein 30	1.1
Qrob_T0047150.2	uncharacterized LOC115963313	1.1
Qrob_T0447520.2	GATA transcription factor 24-like, transcript variant X3	1.1
Qrob_T0236590.2		1.1
Qrob_T0005720.2	probable inactive poly [ADP-ribose] polymerase SRO5, transcript variant X2	1.1
Qrob_T0317680.2	tobamovirus multiplication protein 1, transcript variant X1	1.1
Qrob_T0563250.2	amino acid transporter AVT1A, transcript variant X1	1.1
Qrob_T0231070.2	dehydration-responsive element-binding protein 3-like	1.1
Qrob_T0316530.2	guanylate-binding protein 2	1.1
Qrob_T0363440.2	UPF0051 protein ABCI8, chloroplastic	1.1
Qrob_T0727810.2	60S ribosomal protein L7-1-like	1.1
Qrob_T0412180.2	uncharacterized LOC115991472	1.1
Qrob_T0077890.2	E3 ubiquitin-protein ligase RFWD3-like	1.1
Qrob_T0113250.2		1.1
Qrob_T0533440.2		1.09
Qrob_T0083750.2	protein DMR6-LIKE OXYGENASE 2-like	1.09
Qrob_T0459010.2	uncharacterized LOC115963953, transcript variant X2	1.09
Qrob_T0070970.2		1.09
Qrob_T0366500.2	uncharacterized calcium-binding protein At1g02270-like, transcript variant X3	1.09
Qrob_T0380900.2	acidic endochitinase-like	1.09
Qrob_T0573100.2	trihelix transcription factor ASIL2-like, transcript variant X1	1.09
Qrob_T0424720.2	receptor-like cytosolic serine/threonine-protein kinase RBK2	1.09
Qrob_T0132670.2	hydroxyethylthiazole kinase	1.09
Qrob_T0235540.2	probable adenylate kinase 7, mitochondrial	1.09
Qrob_T0358740.2	uncharacterized LOC115951278	1.09
Qrob_T0435860.2		1.09
Qrob_T0418650.2	glutathione transferase GST 23-like	1.09
Qrob_T0600820.2	F-box protein GID2-like	1.09
Qrob_T0084120.2	AAA-ATPase At2g46620-like	1.09
Qrob_T0182740.2		1.09
Qrob_T0321750.2	RNA polymerase sigma factor sigE, chloroplastic/mitochondrial, transcript variant X3	1.09
Qrob_T0283610.2		1.09
Qrob_T0713190.2	major allergen Pru ar 1-like	1.09
Qrob_T0436820.2	transcriptional corepressor LEUNIG, transcript variant X2	1.08
Qrob_T0249660.2	uncharacterized LOC115955724, transcript variant X4	1.08
Qrob_T0496460.2	potassium transporter 4	1.08
Qrob_T0713540.2	homeobox-leucine zipper protein ATHB-12-like	1.08
Qrob_T0237030.2	protein DETOXIFICATION 29-like	1.08
Qrob_T0477290.2	uncharacterized LOC115994940, transcript variant X2	1.08
Qrob_T0682360.2	polyphenol oxidase, chloroplastic-like, transcript variant X2	1.08
Qrob_T0191890.2	metal transporter Nramp5-like	1.08
Qrob_T0489770.2	G-type lectin S-receptor-like serine/threonine-protein kinase At2g19130, transcript variant X1	1.08
Qrob_T0135410.2	uncharacterized LOC115953522	1.08
Qrob_T0335220.2		1.08
Qrob_T0160460.2	transcription factor TCP4-like, transcript variant X3	1.08
Qrob_T0753640.2	phytosulfokine receptor 1-like	1.08
Qrob_T0494750.2		1.08
Qrob_T0210180.2	bifunctional riboflavin biosynthesis protein RIBA 1, chloroplastic-like, transcript variant X2	1.08
Qrob_T0489120.2	uncharacterized LOC115972271, transcript variant X2	1.08
Qrob_T0089770.2		1.08
Qrob_T0278320.2	uncharacterized LOC115973989	1.08
Qrob_T0610920.2	ubiquitin-conjugating enzyme E2 10	1.07
Qrob_T0042510.2	uncharacterized LOC115984240	1.07
Qrob_T0735020.2	uncharacterized LOC115967862, transcript variant X2	1.07
Qrob_T0240870.2	protein LURP-one-related 8-like	1.07
Qrob_T0418840.2	transcription factor RAX3-like, transcript variant X2	1.07
Qrob_T0129740.2	autophagy-related protein 13b	1.07
Qrob_T0492720.2	germin-like protein subfamily 1 member 20	1.07
Qrob_T0540280.2	kirola-like	1.07
Qrob_T0115780.2		1.07
Qrob_T0482780.2	cinnamoyl-CoA reductase 2-like	1.06
Qrob_T0205230.2	BTB/POZ domain-containing protein At2g30600, transcript variant X3	1.06
Qrob_T0740570.2	uncharacterized LOC115977154	1.06
Qrob_T0495840.2	F-box/LRR-repeat MAX2 homolog A	1.06
Qrob_T0094540.2	caffeic acid 3-O-methyltransferase 1-like	1.06
Qrob_T0714870.2	aquaporin SIP1-1-like	1.06
Qrob_T0157200.2	DNA damage-repair/toleration protein DRT100-like	1.06
Qrob_T0581260.2	phosphoribosylamine--glycine ligase	1.06
Qrob_T0446430.2	tetraspanin-19	1.06
Qrob_T0001830.2	germin-like protein subfamily 1 member 7	1.06
Qrob_T0464970.2	anthocyanidin 3-O-glucosyltransferase 5-like	1.06
Qrob_T0119060.2	sulfite exporter TauE/SafE family protein 2-like	1.06
Qrob_T0451570.2	L-type lectin-domain containing receptor kinase S.1	1.06
Qrob_T0257590.2	putative anthocyanidin reductase	1.06
Qrob_T0400720.2	zinc finger BED domain-containing protein DAYSLEEPER-like	1.06
Qrob_T0540760.2	F-box/kelch-repeat protein At1g51550	1.06
Qrob_T0228120.2		1.06
Qrob_T0337870.2		1.06
Qrob_T0064290.2	protein SET DOMAIN GROUP 40	1.06
Qrob_T0736170.2	telomerase reverse transcriptase-like	1.06
Qrob_T0281770.2	F-box protein CPR1-like	1.05
Qrob_T0640860.2	non-specific lipid-transfer protein 1-like, transcript variant X2	1.05
Qrob_T0343440.2	auxin-responsive protein SAUR36-like	1.05
Qrob_T0502610.2	copper chaperone for superoxide dismutase, chloroplastic/cytosolic, transcript variant X1	1.05
Qrob_T0766790.2	arginine/serine-rich coiled-coil protein 2, transcript variant X2	1.05
Qrob_T0732000.2	breast cancer type 1 susceptibility protein homolog, transcript variant X2	1.05
Qrob_T0079160.2	protein REVEILLE 5	1.05
Qrob_T0126260.2	CRAL-TRIO domain-containing protein C3H8.02	1.05
Qrob_T0462440.2		1.05
Qrob_T0448920.2	2-alkenal reductase (NADP(+)-dependent)-like, transcript variant X2	1.05
Qrob_T0094550.2	elongation factor 2-like, transcript variant X2	1.05
Qrob_T0116200.2	protein DMR6-LIKE OXYGENASE 2-like	1.04
Qrob_T0001820.2	germin-like protein subfamily 1 member 7	1.04
Qrob_T0530450.2		1.04
Qrob_T0689960.2	uncharacterized LOC115995076	1.04
Qrob_T0609520.2	ATP-dependent zinc metalloprotease FTSH 2, chloroplastic, transcript variant X2	1.04
Qrob_T0402830.2	uncharacterized LOC115955593	1.04
Qrob_T0171280.2	protein MOS2-like, transcript variant X7	1.04
Qrob_T0472240.2	thermospermine synthase ACAULIS5	1.04
Qrob_T0120040.2	ferredoxin-thioredoxin reductase, variable chain, chloroplastic-like	1.04
Qrob_T0195060.2	uncharacterized LOC115960141, transcript variant X1	1.04
Qrob_T0257350.2	uncharacterized LOC115957531	1.04
Qrob_T0416520.2		1.04
Qrob_T0287030.2	acyl-coenzyme A thioesterase 13-like	1.04
Qrob_T0574140.2	UDP-glycosyltransferase 74E2-like	1.04
Qrob_T0190770.2	auxin response factor 6	1.03
Qrob_T0544220.2	F-box protein SKP2B, transcript variant X1	1.03
Qrob_T0018270.2	probable E3 ubiquitin-protein ligase LUL2, transcript variant X3	1.03
Qrob_T0239110.2	amino acid transporter AVT3C-like	1.03
Qrob_T0544180.2	2-oxoisovalerate dehydrogenase subunit alpha 2, mitochondrial-like	1.03
Qrob_T0011880.2	transcription factor TGA6, transcript variant X1	1.03
Qrob_T0698300.2	uncharacterized LOC115991994, transcript variant X2	1.03
Qrob_T0682210.2	germin-like protein subfamily 1 member 7	1.03
Qrob_T0573780.2	transcription factor bHLH130-like, transcript variant X5	1.03
Qrob_T0289170.2	ABC transporter C family member 3-like	1.03
Qrob_T0426470.2	U-box domain-containing protein 33-like	1.02
Qrob_T0308240.2	polyubiquitin, transcript variant X2	1.02
Qrob_T0371920.2	transcription repressor MYB5-like	1.02
Qrob_T0135450.2	NDR1/HIN1-like protein 10	1.02
Qrob_T0503820.2	benzyl alcohol O-benzoyltransferase-like	1.02
Qrob_T0692050.2		1.02
Qrob_T0371340.2	COBRA-like protein 1, transcript variant X1	1.02
Qrob_T0752000.2	cysteine-rich repeat secretory protein 38-like	1.02
Qrob_T0693380.2	protein SRG1-like, transcript variant X2	1.02
Qrob_T0128370.2	uncharacterized LOC115960141, transcript variant X1	1.02
Qrob_T0034290.2	protein WHAT'S THIS FACTOR 1 homolog, chloroplastic	1.02
Qrob_T0087890.2		1.02
Qrob_T0611060.2	dihydrofolate synthetase	1.02
Qrob_T0527940.2	UPF0481 protein At3g47200-like	1.02
Qrob_T0018230.2	probable pyridoxal 5'-phosphate synthase subunit PDX2	1.02
Qrob_T0675710.2	loganic acid O-methyltransferase-like	1.02
Qrob_T0432090.2	lysine-specific demethylase JMJ30, transcript variant X1	1.02
Qrob_T0119100.2	oxygen-evolving enhancer protein 3-2, chloroplastic-like	1.02
Qrob_T0747330.2	NKAP-like protein, transcript variant X6	1.02
Qrob_T0616250.2		1.02
Qrob_T0762970.2	asparagine synthetase domain-containing protein 1-like, transcript variant X1	1.02
Qrob_T0481830.2	tropinone reductase homolog At5g06060-like, transcript variant X1	1.02
Qrob_T0178310.2	homeobox-leucine zipper protein ATHB-7-like	1.02
Qrob_T0178530.2	auxin-responsive protein IAA26-like	1.01
Qrob_T0129320.2	protein P21-like	1.01
Qrob_T0190660.2	uncharacterized LOC115989321, transcript variant X1	1.01
Qrob_T0572170.2	MLO-like protein 6	1.01
Qrob_T0463780.2	actin-depolymerizing factor 5-like	1.01
Qrob_T0071190.2	NADP-dependent glyceraldehyde-3-phosphate dehydrogenase	1.01
Qrob_T0252170.2		1.01
Qrob_T0000010.2		1.01
Qrob_T0418030.2	ras-related protein RABH1e	1.01
Qrob_T0322680.2	hexose carrier protein HEX6-like	1.01
Qrob_T0463800.2	protein EARLY-RESPONSIVE TO DEHYDRATION 7, chloroplastic-like	1.01
Qrob_T0248350.2	scarecrow-like protein 34	1.01
Qrob_T0157030.2	protein HSH49, transcript variant X1	1.01
Qrob_T0340870.2	dof zinc finger protein DOF1.4-like, transcript variant X2	1.01
Qrob_T0601000.2	homeobox protein knotted-1-like 2	1.01
Qrob_T0247530.2	brassinosteroid-related acyltransferase 1-like	1.01
Qrob_T0435930.2		1.01
Qrob_T0633210.2		1.01
Qrob_T0268180.2	uncharacterized LOC115983552	1.01
Qrob_T0152970.2	short-chain dehydrogenase TIC 32, chloroplastic-like, transcript variant X2	1.01
Qrob_T0332770.2	myb family transcription factor PHL5-like	1.01
Qrob_T0641020.2	RING-H2 finger protein ATL64-like	1.01
Qrob_T0491960.2	triose phosphate/phosphate translocator, chloroplastic, transcript variant X1	1.01
Qrob_T0594840.2		1.01
Qrob_T0193550.2	protein RRNAD1, transcript variant X10	1.01
Qrob_T0700440.2	alpha-1,4 glucan phosphorylase L isozyme, chloroplastic/amyloplastic, transcript variant X1	1
Qrob_T0037480.2	serine carboxypeptidase-like 45, transcript variant X1	1
Qrob_T0408550.2		1
Qrob_T0517560.2		1
Qrob_T0254750.2	primary amine oxidase-like	1
Qrob_T0424210.2	probable transcriptional regulator SLK2, transcript variant X3	1
Qrob_T0525910.2	zinc finger RNA-binding protein 2-like, transcript variant X2	1
Qrob_T0532630.2	senescence-associated protein AAF, chlorolplastic-like, transcript variant X2	1
Qrob_T0193560.2	protein RRNAD1, transcript variant X10	1
Qrob_T0439660.2	probable LRR receptor-like serine/threonine-protein kinase At1g53430, transcript variant X1	1
Qrob_T0654870.2		1
Qrob_T0106130.2		1
Qrob_T0359030.2		0.99
Qrob_T0705510.2	signal peptide peptidase-like 4	0.99
Qrob_T0698880.2	plant intracellular Ras-group-related LRR protein 5-like	0.99
Qrob_T0521910.2	probable metal-nicotianamine transporter YSL8	0.99
Qrob_T0522090.2	tRNA-dihydrouridine(47) synthase [NAD(P)(+)]-like	0.99
Qrob_T0225990.2	putative F-box protein At1g49610, transcript variant X2	0.99
Qrob_T0129730.2		0.99
Qrob_T0252880.2	glycosyltransferase family protein 64 C3	0.99
Qrob_T0572950.2	F-box protein At2g02240-like, transcript variant X3	0.99
Qrob_T0272770.2	protein CUP-SHAPED COTYLEDON 3-like, transcript variant X3	0.99
Qrob_T0135840.2	glutathionyl-hydroquinone reductase YqjG	0.99
Qrob_T0006670.2	F-box/LRR-repeat protein At4g14103-like	0.99
Qrob_T0264730.2	E3 ubiquitin-protein ligase PUB23	0.99
Qrob_T0728510.2	acyl-coenzyme A oxidase 4, peroxisomal	0.98
Qrob_T0285930.2	late embryogenesis abundant protein At5g17165-like	0.98
Qrob_T0771790.2	uncharacterized LOC115971131	0.98
Qrob_T0568750.2		0.98
Qrob_T0177420.2	protein TIME FOR COFFEE, transcript variant X1	0.98
Qrob_T0126270.2	heme-binding protein 2-like	0.98
Qrob_T0649990.2	adenine nucleotide transporter BT1, chloroplastic/mitochondrial-like	0.98
Qrob_T0237040.2		0.98
Qrob_T0412690.2	cytochrome c-type biogenesis CcmH-like mitochondrial protein, transcript variant X2	0.98
Qrob_T0300240.2		0.98
Qrob_T0315860.2	RNA-binding protein CP31B, chloroplastic	0.98
Qrob_T0203910.2		0.98
Qrob_T0580630.2	uncharacterized LOC115981508	0.98
Qrob_T0070450.2	protein NUCLEAR FUSION DEFECTIVE 4-like, transcript variant X4	0.98
Qrob_T0718160.2	uncharacterized LOC115976253	0.98
Qrob_T0600860.2	putative clathrin assembly protein At4g40080	0.98
Qrob_T0020350.2	protein WHAT'S THIS FACTOR 1 homolog, chloroplastic	0.98
Qrob_T0600200.2	probable LRR receptor-like serine/threonine-protein kinase At1g56140	0.98
Qrob_T0477480.2	uncharacterized LOC115969166	0.97
Qrob_T0024180.2	uncharacterized protein At5g39865-like	0.97
Qrob_T0015760.2	probable aldo-keto reductase 1	0.97
Qrob_T0343930.2	probable 3-hydroxyisobutyrate dehydrogenase-like 1, mitochondrial	0.97
Qrob_T0580520.2		0.97
Qrob_T0248320.2	scarecrow-like protein 34	0.97
Qrob_T0365090.2	uncharacterized LOC115976862, transcript variant X3	0.97
Qrob_T0477550.2	SPX domain-containing membrane protein At4g22990-like, transcript variant X1	0.96
Qrob_T0142110.2	uncharacterized LOC115953321	0.96
Qrob_T0070920.2	probable WRKY transcription factor 32	0.96
Qrob_T0057850.2	uncharacterized LOC115992109	0.96
Qrob_T0247910.2	MACPF domain-containing protein At1g14780-like	0.96
Qrob_T0218860.2	protein PLANT CADMIUM RESISTANCE 10	0.96
Qrob_T0137760.2	uncharacterized LOC115955387, transcript variant X1	0.96
Qrob_T0502640.2	geraniol 8-hydroxylase-like	0.96
Qrob_T0609850.2	F-box protein SKIP14	0.96
Qrob_T0455160.2		0.96
Qrob_T0161950.2	sirohydrochlorin ferrochelatase, chloroplastic-like, transcript variant X2	0.96
Qrob_T0142570.2		0.96
Qrob_T0073260.2	probable purine permease 10, transcript variant X1	0.96
Qrob_T0203940.2		0.96
Qrob_T0409660.2	protein unc-45 homolog A	0.96
Qrob_T0315460.2		0.96
Qrob_T0460830.2	scarecrow-like protein 1, transcript variant X5	0.95
Qrob_T0426610.2	heat shock cognate 70 kDa protein 2-like	0.95
Qrob_T0251550.2	probable protein phosphatase 2C 27, transcript variant X1	0.95
Qrob_T0424670.2	LEC14B protein, transcript variant X1	0.95
Qrob_T0123060.2	phosphatidylinositol 4-kinase gamma 5-like, transcript variant X3	0.95
Qrob_T0600910.2	protein DETOXIFICATION 27-like	0.95
Qrob_T0678350.2	heterogeneous nuclear ribonucleoprotein 1	0.95
Qrob_T0598430.2	serine/threonine-protein kinase BSK1	0.95
Qrob_T0021900.2	U-box domain-containing protein 11-like	0.95
Qrob_T0070990.2	BTB/POZ domain-containing protein At2g24240	0.95
Qrob_T0199740.2		0.95
Qrob_T0044050.2	protein MAIN-LIKE 2-like, transcript variant X1	0.95
Qrob_T0390040.2	UDP-glucose flavonoid 3-O-glucosyltransferase 6-like	0.95
Qrob_T0451100.2	serine/threonine-protein kinase CTR1, transcript variant X1	0.95
Qrob_T0755950.2	uncharacterized LOC115954648	0.95
Qrob_T0121300.2	cystinosin homolog	0.95
Qrob_T0685660.2	probable F-box protein At2g36090	0.95
Qrob_T0178090.2	uncharacterized LOC115975198	0.95
Qrob_T0761150.2	transcription initiation factor TFIID subunit 2, transcript variant X1	0.95
Qrob_T0705560.2	ascorbate transporter, chloroplastic-like	0.95
Qrob_T0351170.2	plasma membrane ATPase 3-like	0.94
Qrob_T0759270.2	F-box/kelch-repeat protein At3g27150, transcript variant X5	0.94
Qrob_T0465430.2	NASP-related protein sim3	0.94
Qrob_T0492960.2	cytochrome b561 and DOMON domain-containing protein At3g25290	0.94
Qrob_T0487340.2		0.94
Qrob_T0609870.2	cytosolic Fe-S cluster assembly factor NBP35-like	0.94
Qrob_T0437350.2	AAA-ATPase At2g46620	0.94
Qrob_T0494900.2	uncharacterized LOC115992401, transcript variant X2	0.94
Qrob_T0071260.2	ABC transporter I family member 1	0.94
Qrob_T0612860.2	remorin-like	0.94
Qrob_T0444000.2	receptor-like serine/threonine-protein kinase At4g25390	0.94
Qrob_T0281650.2		0.94
Qrob_T0050330.2	replication protein A 70 kDa DNA-binding subunit A-like	0.94
Qrob_T0147730.2	uncharacterized LOC115988078	0.94
Qrob_T0379820.2	uncharacterized LOC115950977, transcript variant X3	0.94
Qrob_T0033560.2	protein O-glucosyltransferase 1-like	0.94
Qrob_T0217700.2	uncharacterized LOC115994035	0.94
Qrob_T0275420.2	carboxylesterase 1-like	0.94
Qrob_T0168510.2	disease resistance protein RLM3-like	0.94
Qrob_T0436790.2	gibberellin 3-beta-dioxygenase 1-like	0.94
Qrob_T0510430.2	peroxisomal membrane protein 11C-like, transcript variant X3	0.93
Qrob_T0183060.2	histone H1-like	0.93
Qrob_T0221560.2	glycerol kinase-like	0.93
Qrob_T0049810.2	putative E3 ubiquitin-protein ligase XBAT35, transcript variant X3	0.93
Qrob_T0680320.2	glycerol-3-phosphate acyltransferase 9-like, transcript variant X3	0.93
Qrob_T0244170.2	WRKY transcription factor WRKY24-like	0.93
Qrob_T0464080.2		0.93
Qrob_T0692890.2	U-box domain-containing protein 16	0.93
Qrob_T0265930.2	uncharacterized LOC115952793	0.93
Qrob_T0456890.2	uncharacterized protein At5g41620-like	0.93
Qrob_T0715520.2	glutamate receptor 3.7-like, transcript variant X1	0.93
Qrob_T0070250.2	germin-like protein subfamily T member 2	0.93
Qrob_T0541790.2	geraniol 8-hydroxylase-like	0.93
Qrob_T0542760.2	protein REVEILLE 6, transcript variant X1	0.93
Qrob_T0115580.2	serine/arginine-rich splicing factor RSZ22A, transcript variant X1	0.93
Qrob_T0353470.2	probable isoprenylcysteine alpha-carbonyl methylesterase ICMEL1	0.93
Qrob_T0210300.2	putative clathrin assembly protein At4g40080	0.93
Qrob_T0266360.2	cytochrome P450 81E8-like	0.93
Qrob_T0461000.2	pathogenesis-related protein 1-like	0.93
Qrob_T0004360.2	probable inositol transporter 2	0.92
Qrob_T0462030.2	xylose isomerase, transcript variant X1	0.92
Qrob_T0598340.2	uncharacterized LOC115971641	0.92
Qrob_T0179090.2	long chain acyl-CoA synthetase 7, peroxisomal	0.92
Qrob_T0474520.2	uncharacterized LOC115987480	0.92
Qrob_T0173050.2	wall-associated receptor kinase-like 14, transcript variant X3	0.92
Qrob_T0052920.2	5'-adenylylsulfate reductase 1, chloroplastic-like	0.92
Qrob_T0742070.2	ethylene-responsive transcription factor 5-like	0.92
Qrob_T0361560.2	peroxisome biogenesis protein 12	0.92
Qrob_T0001040.2	putative disease resistance protein At1g50180	0.92
Qrob_T0760110.2	NKAP-like protein, transcript variant X6	0.92
Qrob_T0238650.2	protein STRICTOSIDINE SYNTHASE-LIKE 5-like	0.92
Qrob_T0206930.2		0.92
Qrob_T0256470.2	uncharacterized LOC115952635, transcript variant X2	0.92
Qrob_T0391640.2	protein LURP-one-related 15-like	0.92
Qrob_T0206890.2		0.92
Qrob_T0004150.2	dehydration-responsive element-binding protein 2C-like, transcript variant X2	0.92
Qrob_T0387100.2	uncharacterized LOC115956071, transcript variant X2	0.91
Qrob_T0248260.2	telomere repeat-binding protein 5-like, transcript variant X1	0.91
Qrob_T0111530.2	2-oxoisovalerate dehydrogenase subunit beta 1, mitochondrial, transcript variant X2	0.91
Qrob_T0692060.2	ATP-dependent 6-phosphofructokinase 2	0.91
Qrob_T0064560.2	CASP-like protein 2B1	0.91
Qrob_T0530140.2	uncharacterized LOC115953934, transcript variant X2	0.91
Qrob_T0369730.2	GTP-binding nuclear protein Ran1A-like, transcript variant X4	0.91
Qrob_T0228110.2		0.91
Qrob_T0334180.2	uncharacterized LOC115974995, transcript variant X1	0.91
Qrob_T0739210.2	RING-H2 finger protein ATL33-like	0.91
Qrob_T0222500.2		0.91
Qrob_T0559070.2	caffeoylshikimate esterase-like	0.91
Qrob_T0026680.2	cytochrome P450 89A2-like	0.91
Qrob_T0121170.2	protein LOW PHOTOSYNTHETIC EFFICIENCY 1, chloroplastic-like	0.91
Qrob_T0234620.2	GDSL esterase/lipase 1-like	0.91
Qrob_T0679280.2	ribosomal L1 domain-containing protein 1-like, transcript variant X2	0.91
Qrob_T0318240.2	cytochrome P450 CYP82D47-like	0.9
Qrob_T0571770.2	NDR1/HIN1-like protein 10	0.9
Qrob_T0076410.2	uncharacterized protein At5g19025	0.9
Qrob_T0396650.2	AT-hook motif nuclear-localized protein 17-like	0.9
Qrob_T0659160.2	probable L-gulonolactone oxidase 6	0.9
Qrob_T0403520.2	UDP-glycosyltransferase 73B3-like	0.9
Qrob_T0545280.2	F-box protein CPR1-like	0.9
Qrob_T0465040.2	anthocyanidin 3-O-glucosyltransferase 5-like	0.9
Qrob_T0334910.2	uncharacterized LOC115959845	0.9
Qrob_T0053980.2	red chlorophyll catabolite reductase, chloroplastic-like	0.9
Qrob_T0466000.2	rust resistance kinase Lr10-like	0.9
Qrob_T0238770.2		0.9
Qrob_T0226530.2	F-box/LRR-repeat protein At4g29420, transcript variant X2	0.9
Qrob_T0026670.2	cytochrome P450 89A2-like	0.9
Qrob_T0166530.2	UDP-glycosyltransferase 83A1-like	0.9
Qrob_T0247890.2	alpha,alpha-trehalose-phosphate synthase [UDP-forming] 6-like, transcript variant X2	0.89
Qrob_T0375530.2		0.89
Qrob_T0564850.2	death-inducer obliterator 1-like	0.89
Qrob_T0362270.2	eukaryotic initiation factor 4A-11-like	0.89
Qrob_T0362810.2	flocculation protein FLO11, transcript variant X3	0.89
Qrob_T0437050.2	bZIP transcription factor 12-like, transcript variant X2	0.89
Qrob_T0752080.2		0.89
Qrob_T0745300.2		0.89
Qrob_T0064570.2	CASP-like protein 2B1	0.89
Qrob_T0023190.2	subtilisin-like protease SBT1.8	0.89
Qrob_T0542090.2	lachrymatory-factor synthase-like	0.89
Qrob_T0331770.2	probable LRR receptor-like serine/threonine-protein kinase At1g06840, transcript variant X3	0.89
Qrob_T0090490.2	signal recognition particle 54 kDa protein, chloroplastic	0.89
Qrob_T0495430.2	uncharacterized LOC115994721	0.89
Qrob_T0360110.2		0.89
Qrob_T0131080.2	F-box protein At5g07610-like, transcript variant X2	0.89
Qrob_T0261000.2	zinc finger CCCH domain-containing protein 11-like, transcript variant X2	0.89
Qrob_T0430600.2	abscisate beta-glucosyltransferase-like	0.89
Qrob_T0590420.2	folylpolyglutamate synthase-like, transcript variant X2	0.89
Qrob_T0645150.2	protein ROOT HAIR DEFECTIVE 3 homolog 2, transcript variant X1	0.89
Qrob_T0065230.2	U-box domain-containing protein 35-like	0.89
Qrob_T0728410.2	uncharacterized LOC115968250	0.89
Qrob_T0572110.2		0.89
Qrob_T0070270.2	germin-like protein subfamily T member 2	0.89
Qrob_T0564860.2		0.89
Qrob_T0070260.2	germin-like protein subfamily T member 2	0.89
Qrob_T0380990.2	uncharacterized LOC115983362	0.89
Qrob_T0370880.2	cysteine-rich receptor-like protein kinase 2	0.89
Qrob_T0433020.2		0.89
Qrob_T0158040.2		0.89
Qrob_T0512090.2	pentatricopeptide repeat-containing protein At4g16835, mitochondrial, transcript variant X2	0.89
Qrob_T0636480.2	probable eukaryotic translation initiation factor 5-1, transcript variant X2	0.88
Qrob_T0505040.2	homogentisate 1,2-dioxygenase	0.88
Qrob_T0200990.2		0.88
Qrob_T0459020.2	uncharacterized LOC115963953, transcript variant X2	0.88
Qrob_T0544200.2	ACT domain-containing protein ACR3, transcript variant X2	0.88
Qrob_T0136300.2	uncharacterized LOC115960314, transcript variant X4	0.88
Qrob_T0667130.2	protein EMSY-LIKE 3	0.88
Qrob_T0455440.2	uncharacterized LOC115985721	0.88
Qrob_T0680000.2	heavy metal-associated isoprenylated plant protein 20-like	0.88
Qrob_T0589570.2	uncharacterized LOC115976773	0.88
Qrob_T0387070.2	myb-related protein 308	0.88
Qrob_T0025140.2		0.88
Qrob_T0077940.2	U11/U12 small nuclear ribonucleoprotein 31 kDa protein	0.88
Qrob_T0544370.2	uncharacterized LOC115954178, transcript variant X2	0.88
Qrob_T0152880.2	silicon efflux transporter LSI2-like, transcript variant X3	0.88
Qrob_T0452190.2	mini zinc finger protein 3-like	0.88
Qrob_T0729990.2	syntaxin-43-like, transcript variant X1	0.88
Qrob_T0693450.2	geraniol 8-hydroxylase-like	0.88
Qrob_T0098240.2	homeobox-leucine zipper protein HAT5-like	0.87
Qrob_T0495500.2	polyadenylate-binding protein RBP45B-like, transcript variant X1	0.87
Qrob_T0122640.2	serrate RNA effector molecule	0.87
Qrob_T0424640.2	gibberellin receptor GID1B-like	0.87
Qrob_T0359020.2	glu S.griseus protease inhibitor-like	0.87
Qrob_T0361570.2	protein PHR1-LIKE 1-like, transcript variant X1	0.87
Qrob_T0188690.2	4-hydroxyphenylpyruvate dioxygenase-like	0.87
Qrob_T0674410.2	probable E3 ubiquitin-protein ligase RHB1A, transcript variant X4	0.87
Qrob_T0575540.2	cytochrome P450 76T24-like	0.87
Qrob_T0156870.2	probable glutathione S-transferase	0.87
Qrob_T0717170.2	AT-hook motif nuclear-localized protein 20-like, transcript variant X1	0.87
Qrob_T0605030.2	receptor protein kinase TMK1-like	0.87
Qrob_T0038290.2		0.87
Qrob_T0523480.2	plastidic ATP/ADP-transporter-like	0.86
Qrob_T0200060.2		0.86
Qrob_T0485190.2		0.86
Qrob_T0061490.2	uncharacterized LOC115963904	0.86
Qrob_T0698870.2	MND1-interacting protein 1-like	0.86
Qrob_T0125550.2	uncharacterized LOC115969370, transcript variant X2	0.86
Qrob_T0565330.2	vacuolar protein sorting-associated protein 28 homolog 2-like, transcript variant X2	0.86
Qrob_T0093680.2	UPF0235 protein At5g63440, transcript variant X1	0.86
Qrob_T0264930.2	7-deoxyloganetin glucosyltransferase-like	0.86
Qrob_T0345540.2	uncharacterized LOC115971510	0.86
Qrob_T0091730.2		0.86
Qrob_T0509250.2	uncharacterized LOC115965341	0.86
Qrob_T0268870.2	UBP1-associated protein 2B-like	0.86
Qrob_T0655560.2	pyrrolidone-carboxylate peptidase	0.86
Qrob_T0552280.2	cyclin-dependent kinase inhibitor 4-like	0.86
Qrob_T0226590.2	F-box/kelch-repeat protein At3g06240-like	0.86
Qrob_T0339190.2	uncharacterized protein At1g01500-like	0.86
Qrob_T0756850.2	AP-5 complex subunit mu, transcript variant X2	0.86
Qrob_T0331130.2		0.86
Qrob_T0532980.2	methyltransferase-like protein 2, transcript variant X1	0.86
Qrob_T0688080.2	uncharacterized LOC115975092	0.86
Qrob_T0152790.2	silicon efflux transporter LSI2-like, transcript variant X3	0.86
Qrob_T0178920.2	putative UDP-glucuronate:xylan alpha-glucuronosyltransferase 4	0.86
Qrob_T0453880.2	ABC transporter F family member 5	0.86
Qrob_T0007340.2	pentatricopeptide repeat-containing protein At2g36730	0.86
Qrob_T0736190.2	lysine-specific demethylase JMJ25-like, transcript variant X2	0.86
Qrob_T0112050.2	hypersensitive-induced response protein 1-like	0.85
Qrob_T0427240.2	UBP1-associated protein 2C, transcript variant X3	0.85
Qrob_T0243880.2	delta(3,5)-Delta(2,4)-dienoyl-CoA isomerase, peroxisomal, transcript variant X1	0.85
Qrob_T0501580.2	GDSL esterase/lipase CPRD49-like, transcript variant X2	0.85
Qrob_T0119160.2	protein HEAT-STRESS-ASSOCIATED 32-like	0.85
Qrob_T0066980.2		0.85
Qrob_T0361130.2		0.85
Qrob_T0657650.2		0.85
Qrob_T0226660.2	basic leucine zipper 43-like	0.85
Qrob_T0072490.2	G-type lectin S-receptor-like serine/threonine-protein kinase At4g27290, transcript variant X1	0.85
Qrob_T0687680.2	rho GTPase-activating protein 3	0.85
Qrob_T0519380.2	DEAD-box ATP-dependent RNA helicase 17	0.85
Qrob_T0005790.2	carbonic anhydrase 2-like	0.85
Qrob_T0499240.2	peroxidase 5-like	0.85
Qrob_T0265910.2	pentatricopeptide repeat-containing protein At3g09650, chloroplastic	0.85
Qrob_T0088550.2	uncharacterized LOC115951343	0.85
Qrob_T0724950.2		0.84
Qrob_T0208240.2		0.84
Qrob_T0484720.2	mediator of RNA polymerase II transcription subunit 14	0.84
Qrob_T0519140.2	uncharacterized LOC115988496	0.84
Qrob_T0692920.2		0.84
Qrob_T0370990.2	thioredoxin-like 1-1, chloroplastic	0.84
Qrob_T0590200.2	BTB/POZ and MATH domain-containing protein 3-like	0.84
Qrob_T0433980.2	peptidyl-prolyl cis-trans isomerase FKBP20-1-like, transcript variant X4	0.84
Qrob_T0400980.2	G-type lectin S-receptor-like serine/threonine-protein kinase SD2-5	0.84
Qrob_T0106940.2	histone-lysine N-methyltransferase EZA1, transcript variant X1	0.84
Qrob_T0396610.2	beta carbonic anhydrase 5, chloroplastic-like	0.84
Qrob_T0426590.2	uncharacterized LOC115987268	0.84
Qrob_T0010540.2		0.84
Qrob_T0444090.2	carboxylesterase 1-like	0.84
Qrob_T0261030.2	mediator of RNA polymerase II transcription subunit 4	0.84
Qrob_T0756050.2	uncharacterized LOC115967965, transcript variant X1	0.84
Qrob_T0494290.2		0.84
Qrob_T0398420.2	cytochrome P450 81C13-like, transcript variant X1	0.84
Qrob_T0760130.2	protein HIRA, transcript variant X2	0.84
Qrob_T0347960.2	amidase 1-like	0.84
Qrob_T0219660.2	putative FBD-associated F-box protein At5g56700	0.84
Qrob_T0164870.2	uncharacterized LOC115954855	0.84
Qrob_T0261520.2	ethylene-responsive transcription factor ERF011-like	0.84
Qrob_T0000970.2	zinc finger CCCH domain-containing protein ZFN-like, transcript variant X1	0.84
Qrob_T0724900.2	uncharacterized LOC115993134	0.84
Qrob_T0713580.2	zinc finger protein 511	0.84
Qrob_T0247330.2		0.84
Qrob_T0222480.2	nucleolar MIF4G domain-containing protein 1, transcript variant X2	0.84
Qrob_T0609570.2	uncharacterized LOC115957759	0.84
Qrob_T0448480.2	catalase isozyme 3-like, transcript variant X1	0.83
Qrob_T0354520.2	extradiol ring-cleavage dioxygenase	0.83
Qrob_T0471200.2	transcription factor LHW	0.83
Qrob_T0367630.2	calcium homeostasis endoplasmic reticulum protein, transcript variant X3	0.83
Qrob_T0555290.2	zinc finger CCCH domain-containing protein 66, transcript variant X1	0.83
Qrob_T0474670.2	pyridoxal phosphate homeostasis protein	0.83
Qrob_T0095830.2	probable WRKY transcription factor 47	0.83
Qrob_T0257360.2	uncharacterized LOC115955903, transcript variant X1	0.83
Qrob_T0601020.2	zinc finger CCCH domain-containing protein 23-like	0.83
Qrob_T0375480.2	cyclic nucleotide-gated ion channel 17-like	0.83
Qrob_T0516260.2	uncharacterized LOC115977175	0.83
Qrob_T0532910.2	probable 1-acyl-sn-glycerol-3-phosphate acyltransferase 4, transcript variant X1	0.83
Qrob_T0372430.2	uncharacterized LOC115960406	0.83
Qrob_T0096870.2	putative U-box domain-containing protein 50	0.83
Qrob_T0521950.2	probable myosin-binding protein 6, transcript variant X2	0.83
Qrob_T0328050.2	phenylalanine ammonia-lyase-like	0.83
Qrob_T0182220.2	non-functional NADPH-dependent codeinone reductase 2-like	0.83
Qrob_T0642570.2	molybdopterin synthase sulfur carrier subunit	0.83
Qrob_T0595840.2	acetylornithine aminotransferase, mitochondrial	0.83
Qrob_T0448420.2	aspartic proteinase-like protein 2, transcript variant X2	0.83
Qrob_T0107960.2	F-box protein CPR1-like, transcript variant X1	0.83
Qrob_T0205150.2	probable glutathione S-transferase	0.83
Qrob_T0188940.2		0.83
Qrob_T0426680.2	heat shock cognate 70 kDa protein 2-like, transcript variant X2	0.83
Qrob_T0413880.2	uncharacterized LOC115953197, transcript variant X1	0.83
Qrob_T0528720.2	DEAD-box ATP-dependent RNA helicase 39-like	0.83
Qrob_T0745280.2	histone H3.3	0.82
Qrob_T0637770.2	E3 ubiquitin-protein ligase UPL5-like	0.82
Qrob_T0288900.2	zinc finger CCCH domain-containing protein 18-like, transcript variant X1	0.82
Qrob_T0505610.2	uncharacterized LOC115977031, transcript variant X2	0.82
Qrob_T0593320.2	CAX-interacting protein 4	0.82
Qrob_T0496860.2	40S ribosomal protein S9-2-like	0.82
Qrob_T0156360.2	protein NRT1/ PTR FAMILY 4.3-like	0.82
Qrob_T0659150.2	probable L-gulonolactone oxidase 6	0.82
Qrob_T0328220.2	WD repeat-containing protein ATCSA-1, transcript variant X1	0.82
Qrob_T0007370.2	amino acid transporter AVT1I-like	0.82
Qrob_T0457140.2		0.82
Qrob_T0041920.2	adenylate kinase isoenzyme 6 homolog	0.82
Qrob_T0059990.2	uncharacterized LOC115974148, transcript variant X1	0.82
Qrob_T0110860.2	uncharacterized LOC115954873	0.82
Qrob_T0096880.2	putative U-box domain-containing protein 50	0.82
Qrob_T0155950.2	ubiquitin carboxyl-terminal hydrolase 25	0.82
Qrob_T0523580.2	pleiotropic drug resistance protein 1-like	0.82
Qrob_T0549560.2	tetraketide alpha-pyrone reductase 1-like, transcript variant X1	0.82
Qrob_T0607350.2		0.82
Qrob_T0297860.2	protein SLOW WALKER 1-like	0.82
Qrob_T0032260.2	RAP domain-containing protein, chloroplastic-like	0.82
Qrob_T0379700.2	DEAD-box ATP-dependent RNA helicase 13, transcript variant X2	0.82
Qrob_T0070310.2	germin-like protein subfamily T member 2	0.82
Qrob_T0256360.2	BEL1-like homeodomain protein 9	0.82
Qrob_T0279100.2	non-specific lipid-transfer protein-like protein At2g13820	0.82
Qrob_T0681460.2	probable bifunctional TENA-E protein, transcript variant X1	0.82
Qrob_T0584120.2	protein PLASTID TRANSCRIPTIONALLY ACTIVE 16, chloroplastic	0.82
Qrob_T0128870.2	E3 ubiquitin-protein ligase At3g02290, transcript variant X3	0.82
Qrob_T0097760.2	hydroquinone glucosyltransferase-like	0.82
Qrob_T0430540.2	probable E3 ubiquitin ligase SUD1, transcript variant X2	0.81
Qrob_T0276360.2	pumilio homolog 6, chloroplastic-like, transcript variant X2	0.81
Qrob_T0425690.2	pro-hevein-like	0.81
Qrob_T0545330.2	probable serine/threonine-protein kinase At1g54610	0.81
Qrob_T0313190.2	putative RNA polymerase II subunit B1 CTD phosphatase RPAP2 homolog, transcript variant X1	0.81
Qrob_T0691330.2	uncharacterized LOC115995073, transcript variant X1	0.81
Qrob_T0154250.2	hydroxyacylglutathione hydrolase cytoplasmic	0.81
Qrob_T0713070.2	probable protein phosphatase 2C 34, transcript variant X5	0.81
Qrob_T0268730.2	la-related protein 1A	0.81
Qrob_T0543120.2	F-box protein At5g49610-like	0.81
Qrob_T0355720.2		0.81
Qrob_T0004640.2	GATA transcription factor 1	0.81
Qrob_T0612550.2	E3 ubiquitin-protein ligase XBAT33	0.81
Qrob_T0112580.2	heat shock factor protein HSF8	0.81
Qrob_T0326360.2	protein NRT1/ PTR FAMILY 6.3	0.81
Qrob_T0096850.2	protein ecdysoneless homolog, transcript variant X5	0.81
Qrob_T0667590.2	glycosyltransferase family 92 protein RCOM_0530710	0.81
Qrob_T0238690.2	protein STRICTOSIDINE SYNTHASE-LIKE 5-like, transcript variant X3	0.81
Qrob_T0168010.2	uncharacterized LOC115953279, transcript variant X2	0.81
Qrob_T0671230.2	histone deacetylase complex subunit SAP18	0.81
Qrob_T0136280.2	thioredoxin-like fold domain-containing protein MRL7, chloroplastic, transcript variant X6	0.81
Qrob_T0418270.2	calmodulin-binding transcription activator 3-like, transcript variant X4	0.81
Qrob_T0120380.2	uncharacterized LOC115953539	0.81
Qrob_T0402380.2	transcription factor MYB4-like	0.81
Qrob_T0075710.2	fructose-1,6-bisphosphatase, cytosolic	0.81
Qrob_T0509680.2	hydroquinone glucosyltransferase-like	0.81
Qrob_T0200340.2	BTB/POZ domain-containing protein SR1IP1	0.81
Qrob_T0747610.2		0.81
Qrob_T0201120.2	short-chain dehydrogenase ptmH-like	0.81
Qrob_T0069010.2	transcription factor IIIB 60 kDa subunit-like, transcript variant X5	0.81
Qrob_T0682250.2	germin-like protein subfamily 1 member 7	0.81
Qrob_T0358980.2	TNF receptor-associated factor homolog 1b-like, transcript variant X1	0.8
Qrob_T0160680.2		0.8
Qrob_T0021000.2	DEAD-box ATP-dependent RNA helicase 14	0.8
Qrob_T0661610.2	enolase-like	0.8
Qrob_T0740750.2	pre-mRNA-splicing factor SLU7-A	0.8
Qrob_T0538560.2	E3 ubiquitin ligase PQT3-like, transcript variant X1	0.8
Qrob_T0590240.2	wall-associated receptor kinase-like 20	0.8
Qrob_T0697030.2	WRKY transcription factor 23-like	0.8
Qrob_T0238660.2	protein STRICTOSIDINE SYNTHASE-LIKE 5-like	0.8
Qrob_T0697600.2	protein PIN-LIKES 2	0.8
Qrob_T0758410.2	methylcrotonoyl-CoA carboxylase beta chain, mitochondrial	0.8
Qrob_T0725560.2	rab3 GTPase-activating protein non-catalytic subunit, transcript variant X1	0.8
Qrob_T0522340.2	uncharacterized LOC115957229, transcript variant X2	0.8
Qrob_T0124050.2	binding partner of ACD11 1, transcript variant X1	0.8
Qrob_T0326330.2	AP2-like ethylene-responsive transcription factor At2g41710, transcript variant X1	0.8
Qrob_T0106120.2	ferrochelatase-2, chloroplastic, transcript variant X2	0.8
Qrob_T0337760.2	patatin-like protein 2	0.8
Qrob_T0198040.2	uncharacterized LOC115982663, transcript variant X1	0.8
Qrob_T0678470.2	flagellar radial spoke protein 5	0.8
Qrob_T0743240.2	uncharacterized LOC115983326	0.8
Qrob_T0103210.2	MAP3K epsilon protein kinase 1-like	0.8
Qrob_T0351370.2	AAA-ATPase ASD, mitochondrial-like	0.8
Qrob_T0584580.2	endonuclease MutS2	0.8
Qrob_T0010530.2	transmembrane protein 45B	0.8
Qrob_T0201130.2	short-chain dehydrogenase ptmH-like	0.8
Qrob_T0347520.2	protein trichome birefringence-like 5	0.8
Qrob_T0220800.2		0.8
Qrob_T0255850.2	callose synthase 5	0.8
Qrob_T0103100.2	large ribosomal RNA subunit accumulation protein YCED homolog 1, chloroplastic	0.8
Qrob_T0751150.2	uncharacterized LOC115972173, transcript variant X3	0.8
Qrob_T0378100.2		0.8
Qrob_T0071140.2	CBL-interacting serine/threonine-protein kinase 6-like	0.79
Qrob_T0044150.2	citrate synthase, glyoxysomal	0.79
Qrob_T0664440.2	uncharacterized LOC115971343	0.79
Qrob_T0340830.2	protein RTF1 homolog	0.79
Qrob_T0533840.2	uncharacterized LOC115975162	0.79
Qrob_T0318270.2	cytochrome P450 CYP82D47-like, transcript variant X1	0.79
Qrob_T0313660.2	ADP-ribosylation factor-like protein 5	0.79
Qrob_T0207130.2	DUF21 domain-containing protein At2g14520	0.79
Qrob_T0196940.2	probable glutathione S-transferase, transcript variant X7	0.79
Qrob_T0476550.2	histone H2A deubiquitinase MYSM1, transcript variant X1	0.79
Qrob_T0603780.2	MLO-like protein 10, transcript variant X1	0.79
Qrob_T0760120.2	protein HIRA, transcript variant X1	0.79
Qrob_T0195360.2	zinc finger protein BALDIBIS-like	0.79
Qrob_T0279280.2	probable ATP-dependent DNA helicase CHR12, transcript variant X2	0.79
Qrob_T0159490.2	E3 ubiquitin-protein ligase Topors	0.79
Qrob_T0178030.2	short-chain dehydrogenase TIC 32, chloroplastic	0.79
Qrob_T0533500.2		0.79
Qrob_T0153970.2	pectinesterase 2-like	0.79
Qrob_T0736460.2	probable WRKY transcription factor 27, transcript variant X1	0.79
Qrob_T0637790.2	E3 ubiquitin-protein ligase UPL5-like	0.79
Qrob_T0008370.2	CBL-interacting serine/threonine-protein kinase 5-like	0.79
Qrob_T0504580.2	uncharacterized LOC115974663	0.79
Qrob_T0454520.2	pentatricopeptide repeat-containing protein At1g08610, transcript variant X2	0.79
Qrob_T0570740.2	late embryogenesis abundant protein D-29-like	0.79
Qrob_T0658200.2	uncharacterized LOC115958385	0.79
Qrob_T0018240.2	serine/threonine-protein kinase GRIK1-like, transcript variant X4	0.79
Qrob_T0287920.2	uncharacterized LOC115963375	0.79
Qrob_T0361700.2	protein CHROMATIN REMODELING 20, transcript variant X2	0.79
Qrob_T0219850.2	dynamin-related protein 4C-like	0.79
Qrob_T0649500.2	GDSL esterase/lipase At5g03610-like	0.79
Qrob_T0519370.2	DEAD-box ATP-dependent RNA helicase 17	0.79
Qrob_T0728600.2	protein YLS7, transcript variant X1	0.79
Qrob_T0109050.2	phosphatidate cytidylyltransferase 4, chloroplastic	0.79
Qrob_T0334080.2	caffeic acid 3-O-methyltransferase-like	0.79
Qrob_T0047250.2	iron-sulfur cluster assembly protein 1-like	0.78
Qrob_T0132400.2	uncharacterized LOC115994075, transcript variant X3	0.78
Qrob_T0433130.2	protein ESSENTIAL FOR POTEXVIRUS ACCUMULATION 1, transcript variant X2	0.78
Qrob_T0206170.2	coiled-coil domain-containing protein 124	0.78
Qrob_T0070950.2	eukaryotic translation initiation factor 5A	0.78
Qrob_T0041030.2	uncharacterized LOC115981486	0.78
Qrob_T0418130.2	1-aminocyclopropane-1-carboxylate oxidase homolog 6-like	0.78
Qrob_T0297560.2	cytochrome b561, DM13 and DOMON domain-containing protein At5g54830	0.78
Qrob_T0379640.2	ribosomal RNA-processing protein 14-C, transcript variant X2	0.78
Qrob_T0446780.2	heterogeneous nuclear ribonucleoprotein 1	0.78
Qrob_T0395680.2	mitochondrial-processing peptidase subunit alpha-like	0.78
Qrob_T0135340.2	uncharacterized LOC115983591	0.78
Qrob_T0001490.2	scarecrow-like protein 3	0.78
Qrob_T0338720.2	probable polyamine transporter At1g31830, transcript variant X1	0.78
Qrob_T0162660.2	floral homeotic protein APETALA 2-like, transcript variant X1	0.78
Qrob_T0037140.2	FHA domain-containing protein FHA2, transcript variant X2	0.78
Qrob_T0095860.2	protein translocase subunit SecA, chloroplastic	0.78
Qrob_T0365010.2	potassium channel AKT1-like, transcript variant X1	0.78
Qrob_T0731400.2	G-type lectin S-receptor-like serine/threonine-protein kinase At5g24080, transcript variant X1	0.78
Qrob_T0252200.2		0.78
Qrob_T0391410.2	patellin-6	0.78
Qrob_T0509700.2	hydroquinone glucosyltransferase-like	0.78
Qrob_T0399180.2	putative lysozyme-like protein	0.78
Qrob_T0403360.2	uncharacterized LOC115970003	0.78
Qrob_T0415210.2		0.78
Qrob_T0248230.2	oxysterol-binding protein-related protein 3C	0.77
Qrob_T0136660.2	heterogeneous nuclear ribonucleoprotein R, transcript variant X2	0.77
Qrob_T0449180.2	CBL-interacting serine/threonine-protein kinase 14-like	0.77
Qrob_T0151150.2	peptide methionine sulfoxide reductase-like	0.77
Qrob_T0464060.2		0.77
Qrob_T0276370.2	pumilio homolog 6, chloroplastic-like, transcript variant X2	0.77
Qrob_T0377310.2	putative E3 ubiquitin-protein ligase UBR7	0.77
Qrob_T0412630.2	transcription factor bHLH68-like, transcript variant X2	0.77
Qrob_T0740710.2	U-box domain-containing protein 33-like	0.77
Qrob_T0559010.2	uncharacterized LOC115972415	0.77
Qrob_T0538420.2	uncharacterized LOC115971208, transcript variant X3	0.77
Qrob_T0436940.2	uncharacterized LOC115968706, transcript variant X2	0.77
Qrob_T0343720.2	squamosa promoter-binding-like protein 16, transcript variant X1	0.77
Qrob_T0320980.2		0.77
Qrob_T0687150.2	E3 ubiquitin-protein ligase SINAT2-like, transcript variant X5	0.77
Qrob_T0032200.2	thioredoxin-like fold domain-containing protein MRL7L, chloroplastic, transcript variant X1	0.77
Qrob_T0228360.2	transcription factor bHLH80, transcript variant X2	0.77
Qrob_T0045240.2	28 kDa ribonucleoprotein, chloroplastic	0.77
Qrob_T0362280.2	uncharacterized LOC115991947	0.77
Qrob_T0672440.2		0.77
Qrob_T0067680.2	two-component response regulator ORR21-like	0.77
Qrob_T0042820.2		0.77
Qrob_T0206820.2	MADS-box protein AGL42-like	0.77
Qrob_T0144510.2	UV-B-induced protein At3g17800, chloroplastic	0.77
Qrob_T0305840.2	heterogeneous nuclear ribonucleoprotein U-like protein 1	0.77
Qrob_T0283220.2	probable protein phosphatase 2C 46	0.76
Qrob_T0088670.2	polyadenylation and cleavage factor homolog 4, transcript variant X1	0.76
Qrob_T0120800.2	probable serine/threonine-protein kinase clkA	0.76
Qrob_T0428070.2	peptide methionine sulfoxide reductase A1-like	0.76
Qrob_T0026260.2	translocase of chloroplast 159, chloroplastic	0.76
Qrob_T0462380.2	ethylene-responsive transcription factor 9-like	0.76
Qrob_T0076450.2	defective in cullin neddylation protein 1, transcript variant X1	0.76
Qrob_T0689980.2	nucleolar GTP-binding protein 1-like, transcript variant X6	0.76
Qrob_T0434830.2	transcription factor VOZ1, transcript variant X2	0.76
Qrob_T0478540.2	probable glutathione S-transferase	0.76
Qrob_T0736930.2	APO protein 3, mitochondrial-like, transcript variant X2	0.76
Qrob_T0539170.2	receptor-like protein kinase HERK 1	0.76
Qrob_T0413310.2	uncharacterized LOC115971326	0.76
Qrob_T0747790.2	alcohol dehydrogenase-like	0.76
Qrob_T0612540.2	E3 ubiquitin-protein ligase XBAT33	0.76
Qrob_T0345140.2	G-type lectin S-receptor-like serine/threonine-protein kinase SD1-1, transcript variant X1	0.76
Qrob_T0183970.2	protein BOBBER 1-like	0.76
Qrob_T0343520.2	ACT domain-containing protein ACR4-like	0.76
Qrob_T0404990.2	myb-related protein 308-like	0.76
Qrob_T0563380.2	G patch domain-containing protein TGH	0.76
Qrob_T0635440.2	DNA-directed RNA polymerase V subunit 7-like, transcript variant X2	0.76
Qrob_T0517070.2	zinc finger protein SHOOT GRAVITROPISM 5	0.76
Qrob_T0674400.2		0.76
Qrob_T0286920.2	uncharacterized LOC115983448	0.76
Qrob_T0249010.2	DExH-box ATP-dependent RNA helicase DExH6, transcript variant X1	0.76
Qrob_T0580560.2	uncharacterized LOC115981455	0.76
Qrob_T0224000.2	BTB/POZ and MATH domain-containing protein 1-like, transcript variant X2	0.76
Qrob_T0023020.2	F-box/kelch-repeat protein At3g23880-like, transcript variant X1	0.76
Qrob_T0283040.2	aldehyde dehydrogenase family 3 member H1-like	0.76
Qrob_T0718860.2	heat shock factor protein HSF30-like, transcript variant X2	0.76
Qrob_T0147750.2	nuclear pore complex protein NUP1-like, transcript variant X1	0.75
Qrob_T0026400.2	glutathione S-transferase-like	0.75
Qrob_T0418550.2	transport inhibitor response 1-like protein	0.75
Qrob_T0674970.2	zinc finger CCCH domain-containing protein 13	0.75
Qrob_T0125600.2	protein CHROMATIN REMODELING 35-like, transcript variant X2	0.75
Qrob_T0160330.2	uncharacterized LOC115957354, transcript variant X4	0.75
Qrob_T0140950.2	transcription factor bHLH143-like	0.75
Qrob_T0238310.2	serine/arginine-rich splicing factor SR45a	0.75
Qrob_T0163820.2	transcription factor bHLH155, transcript variant X1	0.75
Qrob_T0126590.2	ribosome biogenesis protein NOP53	0.75
Qrob_T0136000.2	heterogeneous nuclear ribonucleoprotein 1-like	0.75
Qrob_T0228190.2		0.75
Qrob_T0172950.2	cytochrome P450 CYP82D47-like	0.75
Qrob_T0102490.2	uncharacterized protein At5g39570	0.75
Qrob_T0541780.2	geraniol 8-hydroxylase-like	0.75
Qrob_T0078430.2	protein LSD1	0.75
Qrob_T0538430.2	uncharacterized LOC115970238	0.75
Qrob_T0154260.2	hydroxyacylglutathione hydrolase cytoplasmic	0.75
Qrob_T0286880.2	transcription factor MYB63-like	0.75
Qrob_T0358360.2	serine/threonine-protein kinase tricorner-like	0.75
Qrob_T0084220.2	homeobox-leucine zipper protein ATHB-7-like, transcript variant X1	0.75
Qrob_T0209960.2	probable glutathione S-transferase	0.75
Qrob_T0688060.2	autophagy-related protein 3-like, transcript variant X2	0.75
Qrob_T0358710.2		0.75
Qrob_T0724360.2		0.75
Qrob_T0683160.2		0.75
Qrob_T0740560.2		0.75
Qrob_T0642710.2	transcription factor MYB33-like, transcript variant X4	0.75
Qrob_T0750310.2	probable acyl-activating enzyme 17, peroxisomal	0.75
Qrob_T0042520.2		0.75
Qrob_T0559890.2	transcription factor PCL1, transcript variant X2	0.75
Qrob_T0399360.2	pathogenesis-related protein 1-like	0.74
Qrob_T0398690.2	eukaryotic translation initiation factor 5-like, transcript variant X2	0.74
Qrob_T0687910.2	probable copper-transporting ATPase HMA5	0.74
Qrob_T0280700.2	enoyl-CoA delta isomerase 2, peroxisomal-like	0.74
Qrob_T0127020.2	protein NETWORKED 4A-like	0.74
Qrob_T0411850.2	protein NTM1-like 9	0.74
Qrob_T0653300.2	protein phosphatase 1 regulatory inhibitor subunit PPP1R7 homolog, transcript variant X2	0.74
Qrob_T0071250.2	FIP1[V]-like protein, transcript variant X1	0.74
Qrob_T0628620.2	cell division cycle 5-like protein	0.74
Qrob_T0563290.2	transcription factor HBP-1b(c38)-like, transcript variant X2	0.74
Qrob_T0168430.2	isoaspartyl peptidase/L-asparaginase-like	0.74
Qrob_T0304040.2	7-deoxyloganetic acid glucosyl transferase-like, transcript variant X1	0.74
Qrob_T0627310.2	deoxyhypusine hydroxylase	0.74
Qrob_T0740460.2	glyoxysomal processing protease, glyoxysomal, transcript variant X3	0.74
Qrob_T0593760.2		0.74
Qrob_T0742910.2	protein AGENET DOMAIN (AGD)-CONTAINING P1-like	0.74
Qrob_T0068370.2	alkaline/neutral invertase A, mitochondrial-like	0.74
Qrob_T0018980.2	spermatogenesis-associated protein 20	0.74
Qrob_T0688840.2	RING-H2 finger protein ATL56-like, transcript variant X2	0.74
Qrob_T0735280.2	30-kDa cleavage and polyadenylation specificity factor 30	0.74
Qrob_T0043970.2	integrin-linked protein kinase 1, transcript variant X2	0.74
Qrob_T0082940.2		0.74
Qrob_T0293000.2		0.74
Qrob_T0437360.2	AAA-ATPase At2g46620	0.74
Qrob_T0699180.2	pentatricopeptide repeat-containing protein At1g52640, mitochondrial	0.74
Qrob_T0248200.2	uncharacterized LOC115986757, transcript variant X1	0.74
Qrob_T0205180.2	1,4-alpha-glucan-branching enzyme 1, chloroplastic/amyloplastic-like, transcript variant X2	0.73
Qrob_T0104170.2	hypersensitive-induced response protein 1-like, transcript variant X6	0.73
Qrob_T0656160.2	aspartic proteinase A1-like, transcript variant X2	0.73
Qrob_T0387060.2	L-ascorbate peroxidase 3	0.73
Qrob_T0327530.2		0.73
Qrob_T0563270.2		0.73
Qrob_T0397920.2	probable acyl-activating enzyme 6	0.73
Qrob_T0619140.2	bifunctional nitrilase/nitrile hydratase NIT4B	0.73
Qrob_T0004680.2	probable leucine-rich repeat receptor-like protein kinase At2g33170	0.73
Qrob_T0302550.2	RNA-binding protein 34	0.73
Qrob_T0211570.2	receptor-like protein kinase HERK 1	0.73
Qrob_T0082360.2	DUF724 domain-containing protein 6-like, transcript variant X3	0.73
Qrob_T0706920.2		0.73
Qrob_T0748840.2	beta-amylase 1, chloroplastic	0.73
Qrob_T0037160.2	cyclin-T1-5, transcript variant X1	0.73
Qrob_T0286060.2	uncharacterized LOC115962215	0.73
Qrob_T0511080.2	probable nucleoredoxin 2	0.73
Qrob_T0059750.2	transcription factor MYB73-like	0.73
Qrob_T0744160.2	copper-transporting ATPase HMA4-like	0.73
Qrob_T0264750.2	protein EMBRYONIC FLOWER 1, transcript variant X4	0.73
Qrob_T0219110.2		0.73
Qrob_T0423360.2	multiprotein-bridging factor 1c	0.73
Qrob_T0152260.2	general transcription and DNA repair factor IIH subunit TFB4-like, transcript variant X3	0.73
Qrob_T0459000.2		0.73
Qrob_T0437710.2	protein OVEREXPRESSOR OF CATIONIC PEROXIDASE 3	0.73
Qrob_T0119040.2	cysteine-rich receptor-like protein kinase 10	0.73
Qrob_T0554070.2		0.73
Qrob_T0022080.2	putative disease resistance protein At3g14460, transcript variant X4	0.73
Qrob_T0499370.2	uncharacterized LOC115963278, transcript variant X2	0.73
Qrob_T0214010.2	secoisolariciresinol dehydrogenase-like	0.73
Qrob_T0641000.2	purine-uracil permease NCS1	0.73
Qrob_T0256370.2	BEL1-like homeodomain protein 9	0.73
Qrob_T0614860.2	protein JOKA2	0.72
Qrob_T0456970.2	YTH domain-containing protein ECT4, transcript variant X1	0.72
Qrob_T0145250.2	splicing factor-like protein 1	0.72
Qrob_T0722830.2	uncharacterized LOC115980059, transcript variant X3	0.72
Qrob_T0112270.2	splicing factor 3B subunit 1	0.72
Qrob_T0463090.2	uncharacterized LOC115982953	0.72
Qrob_T0747660.2	F-box/kelch-repeat protein At1g22040-like	0.72
Qrob_T0243510.2	berberine bridge enzyme-like 8	0.72
Qrob_T0111330.2	uncharacterized LOC115978532	0.72
Qrob_T0200180.2		0.72
Qrob_T0598500.2		0.72
Qrob_T0455070.2	E3 SUMO-protein ligase SIZ1-like, transcript variant X1	0.72
Qrob_T0523050.2	coiled-coil domain-containing protein 97	0.72
Qrob_T0045280.2		0.72
Qrob_T0240680.2	E3 ubiquitin-protein ligase RDUF1-like	0.72
Qrob_T0587540.2	zinc finger CCCH domain-containing protein 1-like	0.72
Qrob_T0348900.2	dof zinc finger protein 1-like, transcript variant X1	0.72
Qrob_T0701860.2	transcription factor MYB102	0.72
Qrob_T0101960.2	synaptotagmin-3-like, transcript variant X1	0.72
Qrob_T0615880.2	ethylene-responsive transcription factor LEP-like	0.72
Qrob_T0472100.2	PHD finger protein ALFIN-LIKE 4	0.72
Qrob_T0397700.2	AP2/ERF domain-containing protein PFD0985w	0.72
Qrob_T0120160.2	protein PNS1-like	0.72
Qrob_T0034140.2	shewanella-like protein phosphatase 2	0.72
Qrob_T0716110.2		0.72
Qrob_T0127590.2	alanine--glyoxylate aminotransferase 2 homolog 2, mitochondrial-like	0.71
Qrob_T0005890.2	protein EXECUTER 2, chloroplastic, transcript variant X1	0.71
Qrob_T0200020.2		0.71
Qrob_T0099210.2	cysteine desulfurase, mitochondrial	0.71
Qrob_T0446550.2	protein STABILIZED1	0.71
Qrob_T0616700.2	ethylene-responsive transcription factor 4-like	0.71
Qrob_T0248340.2	scarecrow-like protein 33	0.71
Qrob_T0039710.2	coiled-coil domain-containing protein 130-like	0.71
Qrob_T0509200.2	cyclin-dependent kinase G-2-like, transcript variant X3	0.71
Qrob_T0126290.2	uncharacterized LOC115964002, transcript variant X2	0.71
Qrob_T0094700.2		0.71
Qrob_T0101710.2	pumilio homolog 4, transcript variant X2	0.71
Qrob_T0218820.2	myb family transcription factor PHL7-like, transcript variant X1	0.71
Qrob_T0135790.2	homeobox-leucine zipper protein ROC2-like, transcript variant X1	0.71
Qrob_T0383010.2	trihelix transcription factor ASIL2-like	0.71
Qrob_T0555480.2		0.71
Qrob_T0435150.2	guanylate-binding protein 2	0.71
Qrob_T0049890.2	glutathione transferase GST 23-like	0.71
Qrob_T0344300.2	regulator of nonsense transcripts UPF3, transcript variant X2	0.71
Qrob_T0371520.2	two-component response regulator-like APRR9, transcript variant X1	0.71
Qrob_T0348330.2		0.71
Qrob_T0183070.2	protein BASIC PENTACYSTEINE6-like, transcript variant X4	0.71
Qrob_T0294170.2	protein OCTOPUS	0.71
Qrob_T0517790.2	uncharacterized LOC115976129, transcript variant X1	0.71
Qrob_T0023160.2	subtilisin-like protease SBT3	0.71
Qrob_T0504590.2	sec-independent protein translocase protein TATC, chloroplastic	0.71
Qrob_T0645140.2	protein ROOT HAIR DEFECTIVE 3 homolog 2, transcript variant X1	0.71
Qrob_T0173030.2	uncharacterized LOC115995020, transcript variant X2	0.71
Qrob_T0047070.2	serine/threonine protein phosphatase 2A 55 kDa regulatory subunit B beta isoform-like, transcript variant X1	0.71
Qrob_T0420200.2	PRA1 family protein H	0.71
Qrob_T0343700.2	uncharacterized LOC115982138, transcript variant X1	0.71
Qrob_T0309610.2	probable cyclic nucleotide-gated ion channel 20, chloroplastic, transcript variant X4	0.71
Qrob_T0470360.2	alcohol dehydrogenase-like	0.7
Qrob_T0151290.2	MA3 DOMAIN-CONTAINING TRANSLATION REGULATORY FACTOR 1-like, transcript variant X3	0.7
Qrob_T0765390.2	probable protein phosphatase 2C 24	0.7
Qrob_T0034010.2	uncharacterized LOC115955207	0.7
Qrob_T0097430.2	WAT1-related protein At4g08300-like	0.7
Qrob_T0327580.2	zinc finger protein JACKDAW	0.7
Qrob_T0641500.2	adagio protein 1, transcript variant X1	0.7
Qrob_T0241840.2	protein RETICULATA-RELATED 3, chloroplastic-like	0.7
Qrob_T0556050.2	non-lysosomal glucosylceramidase-like, transcript variant X2	0.7
Qrob_T0409840.2	protein C2-DOMAIN ABA-RELATED 7-like	0.7
Qrob_T0200130.2		0.7
Qrob_T0293080.2	uncharacterized LOC115968340	0.7
Qrob_T0658160.2	F-box protein At3g07870, transcript variant X4	0.7
Qrob_T0275580.2	chromatin structure-remodeling complex protein SYD	0.7
Qrob_T0121680.2	uncharacterized LOC115981964	0.7
Qrob_T0102720.2	uncharacterized LOC115981838, transcript variant X4	0.7
Qrob_T0140120.2	peroxisome biogenesis protein 16, transcript variant X1	0.7
Qrob_T0522000.2	chromatin modification-related protein EAF1 B-like, transcript variant X3	0.7
Qrob_T0457150.2	E3 ubiquitin-protein ligase SHPRH	0.7
Qrob_T0232000.2	purple acid phosphatase 15, transcript variant X1	0.7
Qrob_T0241930.2	uncharacterized LOC115951261	0.7
Qrob_T0354640.2	uncharacterized LOC115963767, transcript variant X2	0.7
Qrob_T0578460.2	flavin-containing monooxygenase FMO GS-OX-like 2	0.7
Qrob_T0698360.2	snRNA-activating protein complex subunit, transcript variant X4	0.7
Qrob_T0008040.2	metal tolerance protein 4-like, transcript variant X1	0.7
Qrob_T0726030.2	protein MULTIPLE CHLOROPLAST DIVISION SITE 1	0.7
Qrob_T0622180.2		0.7
Qrob_T0322910.2	cathepsin B-like protease 3	0.69
Qrob_T0485210.2	blue copper protein-like	0.69
Qrob_T0262230.2	uncharacterized LOC115995143	0.69
Qrob_T0427400.2	uncharacterized LOC115977590	0.69
Qrob_T0396580.2	chaperone protein dnaJ 49, transcript variant X2	0.69
Qrob_T0637880.2	U4/U6.U5 tri-snRNP-associated protein 2-like, transcript variant X2	0.69
Qrob_T0383550.2	pre-mRNA-splicing factor ATP-dependent RNA helicase DEAH7-like	0.69
Qrob_T0715160.2	U4/U6 small nuclear ribonucleoprotein PRP4-like protein, transcript variant X1	0.69
Qrob_T0484210.2	serine/threonine-protein kinase STY13-like	0.69
Qrob_T0683190.2	serine/threonine/tyrosine-protein kinase HT1	0.69
Qrob_T0483760.2	mediator-associated protein 2	0.69
Qrob_T0619170.2	NAC domain-containing protein 60-like	0.69
Qrob_T0270770.2	uncharacterized LOC115981245, transcript variant X3	0.69
Qrob_T0145270.2		0.69
Qrob_T0086780.2	E3 ubiquitin-protein ligase SINA-like 10	0.69
Qrob_T0004130.2	abscisic acid receptor PYL4-like	0.69
Qrob_T0274940.2	uncharacterized protein At2g29880-like, transcript variant X2	0.69
Qrob_T0123080.2	calcium/calmodulin-regulated receptor-like kinase 2, transcript variant X2	0.69
Qrob_T0005730.2	putative uncharacterized protein DDB_G0272516	0.69
Qrob_T0582240.2	SH3 domain-containing protein 1, transcript variant X1	0.69
Qrob_T0121360.2	2-(3-amino-3-carboxypropyl)histidine synthase subunit 1, transcript variant X2	0.69
Qrob_T0073220.2	two-pore potassium channel 3-like, transcript variant X2	0.69
Qrob_T0564760.2	protein TIC236, chloroplastic, transcript variant X2	0.69
Qrob_T0648190.2	probable carboxylesterase 15	0.69
Qrob_T0114460.2	UV-stimulated scaffold protein A homolog	0.69
Qrob_T0422180.2	uncharacterized LOC115959545, transcript variant X1	0.68
Qrob_T0114350.2	phospho-2-dehydro-3-deoxyheptonate aldolase 2, chloroplastic-like	0.68
Qrob_T0415960.2	histidine kinase 3, transcript variant X3	0.68
Qrob_T0055830.2	magnesium transporter MRS2-3-like, transcript variant X1	0.68
Qrob_T0304820.2	F-box/LRR-repeat protein 15	0.68
Qrob_T0418590.2	serine/threonine-protein kinase PEPKR2	0.68
Qrob_T0247490.2	zinc finger protein 4-like, transcript variant X2	0.68
Qrob_T0387630.2	nuclear pore complex protein NUP1, transcript variant X3	0.68
Qrob_T0046170.2	uncharacterized LOC115951309	0.68
Qrob_T0448530.2	probable serine/threonine-protein kinase PBL21, transcript variant X2	0.68
Qrob_T0718850.2	BTB/POZ domain and ankyrin repeat-containing protein NPR1-like	0.68
Qrob_T0067690.2	two-component response regulator ORR21-like	0.68
Qrob_T0522370.2	DEAD-box ATP-dependent RNA helicase 32	0.68
Qrob_T0337920.2	uncharacterized LOC115974198, transcript variant X2	0.68
Qrob_T0132710.2	AUGMIN subunit 7, transcript variant X2	0.68
Qrob_T0400920.2	protein LURP-one-related 12-like	0.68
Qrob_T0378020.2	probable glutathione S-transferase	0.68
Qrob_T0025870.2	homocysteine S-methyltransferase 1	0.68
Qrob_T0478250.2	double-stranded RNA-binding protein 5-like	0.68
Qrob_T0467020.2		0.68
Qrob_T0000990.2	zinc finger CCCH domain-containing protein ZFN-like, transcript variant X2	0.68
Qrob_T0705520.2	SKP1-like protein 21, transcript variant X4	0.68
Qrob_T0194820.2	uncharacterized LOC115987947	0.68
Qrob_T0216320.2	probable GTP diphosphokinase CRSH, chloroplastic	0.68
Qrob_T0020400.2	homeobox-leucine zipper protein ATHB-12-like	0.68
Qrob_T0005700.2	serine/threonine-protein kinase ATM, transcript variant X1	0.68
Qrob_T0069190.2		0.68
Qrob_T0349680.2	cyclic dof factor 1-like	0.68
Qrob_T0685930.2	symplekin, transcript variant X2	0.68
Qrob_T0149830.2	ABC transporter C family member 2-like, transcript variant X4	0.68
Qrob_T0721900.2	RNA pseudouridine synthase 3, mitochondrial, transcript variant X2	0.68
Qrob_T0507820.2	protein phosphatase 2C 16-like	0.67
Qrob_T0113960.2	cyclin-dependent kinase G-2, transcript variant X6	0.67
Qrob_T0216660.2	DEAD-box ATP-dependent RNA helicase 46, transcript variant X2	0.67
Qrob_T0185490.2	high-affinity nitrate transporter 3.2-like	0.67
Qrob_T0297250.2	THO complex subunit 4A, transcript variant X1	0.67
Qrob_T0632660.2	diacylglycerol kinase 1	0.67
Qrob_T0396110.2	STOREKEEPER protein-like	0.67
Qrob_T0458890.2	protein FRIGIDA	0.67
Qrob_T0096840.2	nicotinamidase 1	0.67
Qrob_T0391790.2	probable protein phosphatase 2C 9, transcript variant X2	0.67
Qrob_T0499120.2	FACT complex subunit SPT16-like, transcript variant X4	0.67
Qrob_T0004690.2	cyclin-L1-1-like, transcript variant X2	0.67
Qrob_T0040820.2	endochitinase EP3-like	0.67
Qrob_T0300460.2	uncharacterized LOC115975393, transcript variant X1	0.67
Qrob_T0744170.2	uncharacterized LOC115975709	0.67
Qrob_T0571040.2	probable calcium-binding protein CML48	0.67
Qrob_T0431360.2	ammonium transporter 3 member 1-like	0.67
Qrob_T0480670.2		0.67
Qrob_T0291550.2	hydrophobic protein RCI2B	0.67
Qrob_T0057920.2	DNA-dependent metalloprotease WSS1-like, transcript variant X3	0.67
Qrob_T0248490.2	transcription factor BIM2-like, transcript variant X2	0.67
Qrob_T0426290.2	dnaJ protein homolog, transcript variant X2	0.66
Qrob_T0655920.2	DEAD-box ATP-dependent RNA helicase 7	0.66
Qrob_T0406480.2	histone H1-like	0.66
Qrob_T0320640.2	protein OBERON 3	0.66
Qrob_T0313890.2	uncharacterized LOC115993930, transcript variant X4	0.66
Qrob_T0048880.2	3',5'-nucleoside bisphosphate phosphatase, transcript variant X2	0.66
Qrob_T0038810.2	zinc finger A20 and AN1 domain-containing stress-associated protein 5	0.66
Qrob_T0692980.2	serine/threonine-protein kinase STY13	0.66
Qrob_T0663620.2		0.66
Qrob_T0457280.2	U-box domain-containing protein 62-like	0.66
Qrob_T0080400.2	uncharacterized LOC115972179, transcript variant X1	0.66
Qrob_T0427250.2	uncharacterized LOC115955775, transcript variant X4	0.66
Qrob_T0143270.2	lipoyl synthase, mitochondrial-like	0.66
Qrob_T0620540.2	SKP1-like protein 20	0.66
Qrob_T0228060.2	UDP-glycosyltransferase 87A1-like	0.66
Qrob_T0674130.2	DNA polymerase I A, chloroplastic/mitochondrial-like	0.66
Qrob_T0324420.2	uncharacterized membrane protein C776.05-like	0.66
Qrob_T0062670.2	pre-mRNA cleavage factor Im 25 kDa subunit 1	0.66
Qrob_T0609540.2	ras-related protein Rab11D	0.66
Qrob_T0140130.2	transcription factor TCP9	0.66
Qrob_T0159540.2	serine/threonine-protein kinase PBL27	0.66
Qrob_T0316900.2	cactin	0.66
Qrob_T0037120.2	FHA domain-containing protein FHA2, transcript variant X2	0.66
Qrob_T0333790.2	2-alkenal reductase (NADP(+)-dependent)-like	0.66
Qrob_T0131310.2	BTB/POZ domain-containing protein At3g05675, transcript variant X3	0.66
Qrob_T0640130.2	high affinity nitrate transporter 2.5-like	0.66
Qrob_T0255590.2	phosphoglucan, water dikinase, chloroplastic	0.66
Qrob_T0174240.2	transmembrane protein 53, transcript variant X3	0.66
Qrob_T0052980.2	GDSL esterase/lipase At5g55050-like, transcript variant X1	0.66
Qrob_T0208200.2	sodium/hydrogen exchanger 2-like	0.65
Qrob_T0080350.2	putative dual specificity protein phosphatase DSP8	0.65
Qrob_T0254180.2	cell number regulator 8-like	0.65
Qrob_T0474600.2	probable WRKY transcription factor 31	0.65
Qrob_T0601480.2	long chain acyl-CoA synthetase 8, transcript variant X2	0.65
Qrob_T0372450.2	uncharacterized LOC115960406	0.65
Qrob_T0701450.2	60S ribosome subunit biogenesis protein NIP7 homolog	0.65
Qrob_T0709990.2		0.65
Qrob_T0603600.2	uncharacterized LOC115977479, transcript variant X2	0.65
Qrob_T0626430.2	protein-tyrosine-phosphatase MKP1	0.65
Qrob_T0721420.2	pectinesterase	0.65
Qrob_T0310210.2	GDSL esterase/lipase 1-like	0.65
Qrob_T0130870.2		0.65
Qrob_T0594350.2	beta-carotene hydroxylase 2, chloroplastic-like	0.65
Qrob_T0286990.2	auxin-responsive protein SAUR72-like	0.65
Qrob_T0207010.2	uncharacterized LOC115960975, transcript variant X2	0.65
Qrob_T0053010.2	uncharacterized LOC115955883	0.65
Qrob_T0126650.2	amino acid transporter AVT6C-like	0.65
Qrob_T0549120.2	protein PHR1-LIKE 3-like, transcript variant X1	0.65
Qrob_T0052840.2	CASP-like protein 2D1	0.65
Qrob_T0402930.2	uncharacterized LOC115957533, transcript variant X2	0.65
Qrob_T0337790.2	patatin-like protein 2	0.65
Qrob_T0089580.2	protein SYS1 homolog	0.65
Qrob_T0035890.2	rRNA-processing protein EFG1, transcript variant X2	0.65
Qrob_T0241470.2	uncharacterized LOC115953417, transcript variant X2	0.65
Qrob_T0361090.2	NAC domain-containing protein 92	0.65
Qrob_T0666870.2	aspartyl protease APCB1-like	0.65
Qrob_T0224290.2	DEAD-box ATP-dependent RNA helicase 50-like, transcript variant X2	0.65
Qrob_T0544270.2	pentatricopeptide repeat-containing protein At3g29290-like, transcript variant X1	0.65
Qrob_T0170210.2	probable nucleoredoxin 1	0.64
Qrob_T0125510.2	bZIP transcription factor 44-like	0.64
Qrob_T0079170.2	uncharacterized LOC115987310	0.64
Qrob_T0541330.2	primary amine oxidase-like	0.64
Qrob_T0126920.2	probable LRR receptor-like serine/threonine-protein kinase At1g06840, transcript variant X5	0.64
Qrob_T0706880.2	SNW/SKI-interacting protein A	0.64
Qrob_T0156070.2		0.64
Qrob_T0741000.2	translocon at the outer membrane of chloroplasts 64	0.64
Qrob_T0176950.2	probable protein phosphatase 2C 80, transcript variant X4	0.64
Qrob_T0344200.2	transcription factor MYB8-like	0.64
Qrob_T0237010.2	pentatricopeptide repeat-containing protein At2g30100, chloroplastic	0.64
Qrob_T0711490.2		0.64
Qrob_T0336970.2	uncharacterized LOC115952425	0.64
Qrob_T0554120.2	SWI/SNF complex subunit SWI3B	0.64
Qrob_T0403640.2	uncharacterized LOC115965338	0.64
Qrob_T0477380.2	triacylglycerol lipase 1	0.64
Qrob_T0439950.2	putative GTP diphosphokinase RSH1, chloroplastic	0.64
Qrob_T0442660.2	alkaline/neutral invertase E, chloroplastic-like	0.64
Qrob_T0468650.2	F-box protein CPR1-like	0.64
Qrob_T0208230.2		0.64
Qrob_T0551090.2	uncharacterized LOC115976356, transcript variant X2	0.64
Qrob_T0145640.2		0.64
Qrob_T0432560.2	glycine oxidase-like, transcript variant X1	0.64
Qrob_T0477400.2		0.64
Qrob_T0049020.2	serine/arginine-rich splicing factor SC35, transcript variant X2	0.64
Qrob_T0509710.2	hydroquinone glucosyltransferase-like	0.64
Qrob_T0677220.2	FT-interacting protein 3-like	0.63
Qrob_T0075140.2	uncharacterized LOC115969185	0.63
Qrob_T0765360.2	eukaryotic translation initiation factor 3 subunit G-like	0.63
Qrob_T0300480.2	subtilisin-like protease SBT3.3	0.63
Qrob_T0608200.2	zinc finger CCCH domain-containing protein 49-like	0.63
Qrob_T0692380.2	bZIP transcription factor 60	0.63
Qrob_T0278730.2	uncharacterized LOC115977390, transcript variant X2	0.63
Qrob_T0602180.2	4-hydroxy-3-methylbut-2-en-1-yl diphosphate synthase (ferredoxin), chloroplastic, transcript variant X3	0.63
Qrob_T0651570.2	protein NUCLEAR FUSION DEFECTIVE 4-like	0.63
Qrob_T0064250.2	scopoletin glucosyltransferase-like	0.63
Qrob_T0088830.2	protein MLP2-like	0.63
Qrob_T0656150.2	aspartic proteinase A1-like, transcript variant X2	0.63
Qrob_T0533330.2	RNA-binding protein FUS, transcript variant X4	0.63
Qrob_T0567410.2	eukaryotic peptide chain release factor subunit 1-3-like	0.63
Qrob_T0481560.2	phosphatidylinositol 4-kinase gamma 7-like, transcript variant X3	0.63
Qrob_T0263670.2	elongator complex protein 3	0.63
Qrob_T0555100.2	probable pyridoxal 5'-phosphate synthase subunit PDX1	0.63
Qrob_T0441770.2	putative clathrin assembly protein At2g25430	0.63
Qrob_T0178300.2	mediator of RNA polymerase II transcription subunit 10b-like, transcript variant X5	0.63
Qrob_T0480100.2	disease resistance protein RPM1-like	0.63
Qrob_T0577580.2	plant UBX domain-containing protein 11	0.63
Qrob_T0200510.2	protein CPR-5	0.63
Qrob_T0697120.2	ATP-dependent (S)-NAD(P)H-hydrate dehydratase, transcript variant X3	0.63
Qrob_T0416510.2		0.63
Qrob_T0467840.2		0.63
Qrob_T0530120.2	probable E3 ubiquitin-protein ligase LOG2	0.63
Qrob_T0112410.2		0.63
Qrob_T0590820.2	uncharacterized LOC115972529	0.63
Qrob_T0090450.2	F-box/kelch-repeat protein At1g57790-like, transcript variant X3	0.63
Qrob_T0636530.2	vacuolar protein sorting-associated protein 9A-like	0.63
Qrob_T0115430.2	G-type lectin S-receptor-like serine/threonine-protein kinase At1g34300	0.63
Qrob_T0296160.2	AAA-ATPase At5g17760-like, transcript variant X2	0.63
Qrob_T0732690.2	probable WRKY transcription factor 3, transcript variant X1	0.63
Qrob_T0212280.2	protein BASIC PENTACYSTEINE2-like, transcript variant X2	0.63
Qrob_T0018260.2	F-box/kelch-repeat protein At5g60570	0.63
Qrob_T0758980.2	F-box protein GID2-like	0.63
Qrob_T0248430.2	uncharacterized LOC115986639	0.63
Qrob_T0656380.2	uncharacterized LOC115980555, transcript variant X5	0.63
Qrob_T0520580.2	uncharacterized protein At5g02240-like	0.63
Qrob_T0078710.2	macrophage migration inhibitory factor homolog	0.63
Qrob_T0592920.2	patellin-6	0.63
Qrob_T0246470.2	vacuolar protein sorting-associated protein 41 homolog, transcript variant X1	0.63
Qrob_T0061530.2	probable E3 ubiquitin-protein ligase ARI7	0.62
Qrob_T0689700.2	thioredoxin H-type-like	0.62
Qrob_T0281700.2	putative MO25-like protein At5g47540	0.62
Qrob_T0536540.2	uncharacterized LOC115965966, transcript variant X1	0.62
Qrob_T0040770.2	endochitinase EP3-like	0.62
Qrob_T0514540.2	protein SRG1-like	0.62
Qrob_T0114790.2		0.62
Qrob_T0466310.2	NEDD8 ultimate buster 1	0.62
Qrob_T0239590.2	peroxisomal membrane protein 13	0.62
Qrob_T0204930.2	ATP-dependent zinc metalloprotease FTSH, chloroplastic	0.62
Qrob_T0585230.2	myosin heavy chain kinase B-like, transcript variant X1	0.62
Qrob_T0274880.2	uncharacterized LOC115967554	0.62
Qrob_T0234470.2	translation initiation factor eIF-2B subunit beta-like, transcript variant X3	0.62
Qrob_T0514250.2	transcription factor GTE12	0.62
Qrob_T0479380.2		0.62
Qrob_T0459670.2	CWF19-like protein 2, transcript variant X1	0.62
Qrob_T0425290.2	myosin-6, transcript variant X2	0.62
Qrob_T0050270.2	zinc finger protein 830	0.62
Qrob_T0168050.2		0.62
Qrob_T0426340.2	E3 ubiquitin-protein ligase BRE1-like 1, transcript variant X1	0.62
Qrob_T0010560.2	diphthamide biosynthesis protein 3-like	0.62
Qrob_T0073740.2	pectin acetylesterase 8-like, transcript variant X2	0.62
Qrob_T0026470.2	protein APEM9	0.62
Qrob_T0533830.2		0.62
[truncated: 935 more rows]

## Sheet: LR-DS_down-regulated
Gene	Annotation	log2FC
Qrob_T0232110.2		-7.18
Qrob_T0278450.2	probable xyloglucan endotransglucosylase/hydrolase protein 23	-7.03
Qrob_T0665070.2	uncharacterized LOC115995296	-6.72
Qrob_T0307950.2	uncharacterized LOC115973910	-6.35
Qrob_T0111190.2	probable aspartyl protease At4g16563	-6.35
Qrob_T0052260.2		-6.26
Qrob_T0031690.2	wall-associated receptor kinase 1-like	-6.24
Qrob_T0181480.2		-6.23
Qrob_T0645090.2	probable aspartyl protease At4g16563	-6.23
Qrob_T0694390.2	inactive protein RESTRICTED TEV MOVEMENT 2-like	-5.94
Qrob_T0498150.2	vicianin hydrolase-like	-5.87
Qrob_T0313740.2	putative calcium-transporting ATPase 13, plasma membrane-type	-5.87
Qrob_T0513870.2	ethylene-responsive transcription factor ERF086	-5.86
Qrob_T0371880.2		-5.68
Qrob_T0173140.2		-5.53
Qrob_T0211650.2	uncharacterized LOC115987977	-5.52
Qrob_T0356110.2		-5.47
Qrob_T0746810.2		-5.45
Qrob_T0149590.2	tyrosine/DOPA decarboxylase 2-like	-5.41
Qrob_T0413630.2	BTB/POZ domain-containing protein At3g49900	-5.4
Qrob_T0690530.2		-5.37
Qrob_T0342220.2		-5.36
Qrob_T0342200.2		-5.36
Qrob_T0028380.2	endo-1,4-beta-xylanase 5-like	-5.35
Qrob_T0584160.2	tropinone reductase homolog At5g06060-like, transcript variant X1	-5.3
Qrob_T0082210.2		-5.27
Qrob_T0131710.2		-5.24
Qrob_T0232900.2	laccase-14-like	-5.17
Qrob_T0416310.2	rust resistance kinase Lr10-like	-5.17
Qrob_T0265000.2	proline-rich receptor-like protein kinase PERK1, transcript variant X1	-5.16
Qrob_T0665060.2	uncharacterized LOC115995296	-5.15
Qrob_T0111560.2	geraniol 8-hydroxylase-like	-5.13
Qrob_T0575800.2	putative disease resistance RPP13-like protein 1, transcript variant X7	-5.1
Qrob_T0388020.2	probable flavin-containing monooxygenase 1	-5.09
Qrob_T0182900.2	protein LATERAL ROOT PRIMORDIUM 1-like	-5.09
Qrob_T0455290.2	18.2 kDa class I heat shock protein-like	-5.05
Qrob_T0598050.2	L-tryptophan--pyruvate aminotransferase 1-like	-5.03
Qrob_T0294370.2	heavy metal-associated isoprenylated plant protein 46-like	-5.02
Qrob_T0390540.2	beta-glucosidase 12-like, transcript variant X1	-4.95
Qrob_T0751270.2	protein SIEVE ELEMENT OCCLUSION B-like	-4.94
Qrob_T0310980.2		-4.94
Qrob_T0459780.2	L-tryptophan--pyruvate aminotransferase 1	-4.94
Qrob_T0038880.2	protein gamma response 1-like	-4.93
Qrob_T0167000.2		-4.9
Qrob_T0522060.2		-4.86
Qrob_T0412390.2		-4.86
Qrob_T0185470.2	cytochrome P450 71A1-like, transcript variant X1	-4.86
Qrob_T0652020.2	auxin-responsive protein IAA20-like	-4.85
Qrob_T0042900.2		-4.85
Qrob_T0244630.2		-4.85
Qrob_T0546480.2		-4.82
Qrob_T0165570.2		-4.81
Qrob_T0547230.2	cytosolic sulfotransferase 5-like	-4.81
Qrob_T0251900.2		-4.79
Qrob_T0304490.2	indole-3-acetic acid-induced protein ARG7	-4.77
Qrob_T0458340.2	protein trichome birefringence-like 43, transcript variant X2	-4.76
Qrob_T0396540.2		-4.76
Qrob_T0070020.2		-4.75
Qrob_T0337960.2	B3 domain-containing protein At5g42700-like	-4.75
Qrob_T0001060.2	RING-H2 finger protein ATL1-like	-4.75
Qrob_T0458290.2	protein trichome birefringence-like 43	-4.74
Qrob_T0264580.2	aspartate--tRNA ligase 2, cytoplasmic, transcript variant X2	-4.72
Qrob_T0705300.2	uncharacterized LOC115958586	-4.69
Qrob_T0246020.2	serine carboxypeptidase-like 18	-4.68
Qrob_T0486620.2	disease resistance protein RPP13-like	-4.68
Qrob_T0127650.2		-4.68
Qrob_T0090590.2		-4.68
Qrob_T0278540.2	probable xyloglucan endotransglucosylase/hydrolase protein 23, transcript variant X2	-4.67
Qrob_T0072750.2	calcium-binding protein KRP1-like	-4.67
Qrob_T0700830.2	myrcene synthase, chloroplastic-like	-4.67
Qrob_T0157440.2		-4.66
Qrob_T0491340.2	beta-glucosidase 13-like	-4.64
Qrob_T0331490.2		-4.62
Qrob_T0581470.2	probable glutathione S-transferase, transcript variant X1	-4.61
Qrob_T0055580.2	serine carboxypeptidase-like 25	-4.59
Qrob_T0256070.2	G-type lectin S-receptor-like serine/threonine-protein kinase LECRK1	-4.59
Qrob_T0388040.2	probable flavin-containing monooxygenase 1	-4.59
Qrob_T0422240.2		-4.59
Qrob_T0585600.2	uncharacterized LOC115969513	-4.58
Qrob_T0591190.2	WD repeat-containing protein 74-like	-4.58
Qrob_T0374570.2	uncharacterized LOC115966118	-4.58
Qrob_T0224450.2		-4.58
Qrob_T0270650.2		-4.57
Qrob_T0628670.2	TMV resistance protein N-like	-4.57
Qrob_T0597650.2		-4.57
Qrob_T0013100.2		-4.51
Qrob_T0405410.2	probable 2-oxoglutarate-dependent dioxygenase AOP1	-4.51
Qrob_T0553800.2	uncharacterized LOC115987610	-4.51
Qrob_T0376280.2	alcohol dehydrogenase-like 1, transcript variant X2	-4.5
Qrob_T0301920.2		-4.48
Qrob_T0706100.2	pollen-specific leucine-rich repeat extensin-like protein 1	-4.48
Qrob_T0724210.2	serine/threonine-protein kinase-like protein CCR2	-4.47
Qrob_T0278490.2	xyloglucan endotransglucosylase/hydrolase protein 22-like	-4.47
Qrob_T0121040.2	protein SIEVE ELEMENT OCCLUSION B-like	-4.47
Qrob_T0430140.2	G-type lectin S-receptor-like serine/threonine-protein kinase LECRK4	-4.47
Qrob_T0560610.2		-4.47
Qrob_T0032930.2	gibberellin-regulated protein 14-like	-4.45
Qrob_T0357720.2		-4.45
Qrob_T0721220.2		-4.45
Qrob_T0409300.2		-4.41
Qrob_T0212070.2	acyl-coenzyme A thioesterase 9, mitochondrial	-4.39
Qrob_T0202030.2	wall-associated receptor kinase-like 20	-4.34
Qrob_T0654710.2	transcription factor MYB14-like	-4.32
Qrob_T0134350.2	thaumatin-like protein 1	-4.32
Qrob_T0338490.2	linoleate 13S-lipoxygenase 2-1, chloroplastic-like	-4.28
Qrob_T0213780.2		-4.24
Qrob_T0202390.2	cytochrome P450 CYP749A22-like	-4.23
Qrob_T0551020.2	cytochrome P450 CYP749A22-like	-4.23
Qrob_T0080290.2	probable disease resistance protein At5g45490	-4.2
Qrob_T0010890.2	uncharacterized LOC115966843	-4.19
Qrob_T0517960.2	potassium channel KAT2-like	-4.19
Qrob_T0050590.2		-4.16
Qrob_T0154880.2		-4.13
Qrob_T0666690.2		-4.13
Qrob_T0593800.2	salicylate carboxymethyltransferase-like	-4.12
Qrob_T0163020.2	uncharacterized LOC115993801	-4.11
Qrob_T0596980.2	uncharacterized LOC115959123, transcript variant X2	-4.07
Qrob_T0477270.2	pentatricopeptide repeat-containing protein At5g66500, mitochondrial	-4.06
Qrob_T0017230.2	protein DMR6-LIKE OXYGENASE 2-like, transcript variant X1	-4.04
Qrob_T0751240.2		-3.98
Qrob_T0566620.2	ABC transporter G family member 11-like	-3.97
Qrob_T0600940.2	cationic peroxidase 1-like	-3.94
Qrob_T0388890.2	transcription factor MYB26	-3.93
Qrob_T0154230.2	putative lipid-binding protein AIR1, transcript variant X1	-3.9
Qrob_T0413550.2	cyclin-D5-1-like	-3.9
Qrob_T0097020.2	putative UDP-rhamnose:rhamnosyltransferase 1, transcript variant X2	-3.89
Qrob_T0365430.2	transcription factor PRE6-like	-3.87
Qrob_T0641250.2	ABC transporter C family member 14-like	-3.86
Qrob_T0313780.2	putative calcium-transporting ATPase 13, plasma membrane-type	-3.86
Qrob_T0612280.2	1-aminocyclopropane-1-carboxylate synthase CMA101	-3.82
Qrob_T0429440.2	uncharacterized LOC115988861, transcript variant X3	-3.82
Qrob_T0570760.2	protein RADIALIS-like 3, transcript variant X1	-3.81
Qrob_T0272580.2	protein DETOXIFICATION 16-like	-3.8
Qrob_T0304250.2	cucumisin-like, transcript variant X2	-3.78
Qrob_T0491370.2	beta-glucosidase 13-like	-3.78
Qrob_T0190210.2	probable disease resistance protein At5g66900	-3.78
Qrob_T0669400.2	ELMO domain-containing protein A, transcript variant X1	-3.77
Qrob_T0511790.2	annexin D4	-3.73
Qrob_T0017140.2	4-coumarate--CoA ligase-like 5	-3.73
Qrob_T0548530.2	L-lactate dehydrogenase B-like	-3.73
Qrob_T0728460.2	B3 domain-containing protein Os01g0234100-like	-3.71
Qrob_T0097060.2	UDP-glycosyltransferase 91A1-like	-3.71
Qrob_T0718370.2		-3.69
Qrob_T0324630.2	transcription factor MYB3-like	-3.63
Qrob_T0148870.2	NAC domain-containing protein 86-like	-3.62
Qrob_T0237080.2	protein DETOXIFICATION 29-like	-3.61
Qrob_T0186630.2	photosystem II 22 kDa protein, chloroplastic	-3.61
Qrob_T0089600.2		-3.6
Qrob_T0227870.2	G-type lectin S-receptor-like serine/threonine-protein kinase LECRK1	-3.6
Qrob_T0154220.2	putative lipid-binding protein AIR1, transcript variant X1	-3.59
Qrob_T0482900.2		-3.58
Qrob_T0455240.2	18.2 kDa class I heat shock protein-like	-3.58
Qrob_T0650030.2	soyasapogenol B glucuronide galactosyltransferase-like	-3.57
Qrob_T0251910.2	G2/mitotic-specific cyclin-2-like	-3.55
Qrob_T0320050.2	uncharacterized LOC115974318	-3.55
Qrob_T0596240.2	basic leucine zipper 61	-3.54
Qrob_T0216590.2		-3.53
Qrob_T0382960.2	uncharacterized LOC115987945	-3.53
Qrob_T0033040.2	senescence-associated carboxylesterase 101-like, transcript variant X3	-3.53
Qrob_T0237620.2		-3.52
Qrob_T0422160.2	heavy metal-associated isoprenylated plant protein 9	-3.51
Qrob_T0212010.2	acyl-coenzyme A thioesterase 9, mitochondrial-like	-3.51
Qrob_T0537910.2	cytochrome P450 82G1-like	-3.51
Qrob_T0523590.2	pleiotropic drug resistance protein 1-like, transcript variant X4	-3.51
Qrob_T0020230.2		-3.49
Qrob_T0321650.2	laccase-14-like	-3.48
Qrob_T0579130.2	B3 domain-containing protein At5g42700-like	-3.48
Qrob_T0032970.2		-3.46
Qrob_T0384430.2		-3.44
Qrob_T0064730.2	protein PYRICULARIA ORYZAE RESISTANCE 21-like, transcript variant X1	-3.44
Qrob_T0365300.2		-3.44
Qrob_T0324610.2	transcription factor MYB57-like	-3.43
Qrob_T0089850.2	protein POLAR LOCALIZATION DURING ASYMMETRIC DIVISION AND REDISTRIBUTION-like	-3.43
Qrob_T0151140.2	vignain	-3.42
Qrob_T0352030.2	phosphoethanolamine N-methyltransferase 1	-3.41
Qrob_T0257000.2	G2/mitotic-specific cyclin S13-7-like	-3.4
Qrob_T0154210.2	putative lipid-binding protein AIR1, transcript variant X1	-3.39
Qrob_T0454170.2	probable LRR receptor-like serine/threonine-protein kinase At4g36180	-3.39
Qrob_T0139540.2	BON1-associated protein 2	-3.38
Qrob_T0597160.2	beta-glucosidase 13-like	-3.37
Qrob_T0409510.2		-3.37
Qrob_T0111350.2	reticulon-like protein B14	-3.37
Qrob_T0524890.2	eukaryotic translation initiation factor 2-alpha kinase-like	-3.37
Qrob_T0026220.2	uncharacterized LOC115955240	-3.35
Qrob_T0168150.2	uncharacterized LOC115953561	-3.34
Qrob_T0011530.2		-3.33
Qrob_T0176350.2	protein GRIM REAPER	-3.3
Qrob_T0629370.2	auxin-induced protein IAA6-like	-3.29
Qrob_T0339370.2	serine carboxypeptidase-like 7	-3.28
Qrob_T0303840.2		-3.28
Qrob_T0707320.2	serine carboxypeptidase-like 45	-3.27
Qrob_T0376530.2	protein EXORDIUM-like	-3.27
Qrob_T0055560.2		-3.26
Qrob_T0194920.2	uncharacterized LOC115987704	-3.26
Qrob_T0313060.2	uncharacterized LOC115953148	-3.26
Qrob_T0337590.2	laccase-14-like, transcript variant X1	-3.25
Qrob_T0656470.2	glucan endo-1,3-beta-glucosidase 1	-3.22
Qrob_T0071930.2		-3.18
Qrob_T0358450.2	protein CHUP1, chloroplastic-like	-3.15
Qrob_T0491360.2	beta-glucosidase 13-like	-3.14
Qrob_T0033000.2	senescence-associated carboxylesterase 101-like, transcript variant X1	-3.14
Qrob_T0678340.2	uncharacterized LOC115995188	-3.12
Qrob_T0149530.2	tyrosine/DOPA decarboxylase 2-like	-3.11
Qrob_T0089800.2	probable WRKY transcription factor 40, transcript variant X2	-3.11
Qrob_T0090440.2	uncharacterized LOC115953422	-3.1
Qrob_T0278530.2	probable xyloglucan endotransglucosylase/hydrolase protein 23	-3.1
Qrob_T0040870.2		-3.1
Qrob_T0683230.2	non-classical arabinogalactan protein 31-like	-3.1
Qrob_T0104120.2	zinc transporter 1-like	-3.09
Qrob_T0577330.2	WAT1-related protein At4g30420-like	-3.08
Qrob_T0716520.2		-3.08
Qrob_T0764900.2	protein EXORDIUM-like	-3.06
Qrob_T0018830.2	cryptochrome DASH, chloroplastic/mitochondrial, transcript variant X1	-3.06
Qrob_T0053840.2	cell number regulator 2-like	-3.05
Qrob_T0211760.2	uncharacterized LOC115987977	-3.05
Qrob_T0157380.2		-3.05
Qrob_T0363800.2		-3.05
Qrob_T0052270.2		-3.05
Qrob_T0666150.2	alpha-L-fucosidase 1-like, transcript variant X1	-3.04
Qrob_T0278440.2	probable xyloglucan endotransglucosylase/hydrolase protein 23	-3.04
Qrob_T0457090.2	beta-amyrin 28-monooxygenase-like	-3.03
Qrob_T0602950.2	mitochondrial uncoupling protein 5-like	-3.03
Qrob_T0422990.2	F-box/LRR-repeat protein 17	-3.02
Qrob_T0502880.2	beta-fructofuranosidase, insoluble isoenzyme CWINV1-like	-3.02
Qrob_T0285550.2	pathogenesis-related protein PRB1-3-like	-3.02
Qrob_T0084230.2		-3.02
Qrob_T0018400.2		-3.02
Qrob_T0494340.2	probable inactive purple acid phosphatase 27	-3.02
Qrob_T0754610.2	early nodulin-93-like	-3.01
Qrob_T0748500.2	beta-glucosidase 13-like, transcript variant X1	-3.01
Qrob_T0154180.2	putative lipid-binding protein At4g00165	-3.01
Qrob_T0457080.2	beta-amyrin 28-monooxygenase-like	-3
Qrob_T0317750.2	cytochrome b561 domain-containing protein At4g18260-like, transcript variant X1	-3
Qrob_T0444030.2	transcription factor bHLH118-like	-3
Qrob_T0163730.2	RING-H2 finger protein ATL16-like	-3
Qrob_T0566920.2	kinesin-like protein KIN-4C	-2.99
Qrob_T0674830.2		-2.99
Qrob_T0283520.2		-2.99
Qrob_T0618950.2	uncharacterized LOC115988327	-2.98
Qrob_T0736550.2	probable LL-diaminopimelate aminotransferase, chloroplastic	-2.98
Qrob_T0247370.2	rac-like GTP-binding protein RAC2	-2.98
Qrob_T0309490.2		-2.98
Qrob_T0070740.2	serine carboxypeptidase 24, transcript variant X1	-2.98
Qrob_T0388390.2	4-coumarate--CoA ligase-like 7	-2.98
Qrob_T0178450.2	acid phosphatase 1-like	-2.97
Qrob_T0083090.2	protein TPX2-like, transcript variant X3	-2.97
Qrob_T0596160.2		-2.97
Qrob_T0519170.2		-2.96
Qrob_T0139400.2	DNA topoisomerase 2-like	-2.96
Qrob_T0240550.2	ribulose bisphosphate carboxylase/oxygenase activase, chloroplastic-like	-2.96
Qrob_T0010330.2	probable protein ABIL5, transcript variant X1	-2.95
Qrob_T0376600.2	protein EXORDIUM-like 2	-2.95
Qrob_T0178460.2	acid phosphatase 1-like	-2.93
Qrob_T0178970.2	probable microtubule-binding protein TANGLED	-2.92
Qrob_T0473530.2	WEB family protein At1g75720, transcript variant X3	-2.92
Qrob_T0148900.2	sucrose synthase 7-like	-2.91
Qrob_T0035660.2	auxin-responsive protein IAA14-like	-2.91
Qrob_T0629470.2	peroxidase 5-like	-2.91
Qrob_T0682370.2		-2.91
Qrob_T0115390.2	probable LRR receptor-like serine/threonine-protein kinase At4g31250	-2.91
Qrob_T0317610.2		-2.9
Qrob_T0660350.2	transcription factor MYB8-like	-2.89
Qrob_T0199470.2	receptor protein kinase-like protein ZAR1, transcript variant X1	-2.89
Qrob_T0285580.2	cell division cycle 20.2, cofactor of APC complex-like, transcript variant X2	-2.88
Qrob_T0703720.2	leucine-rich repeat extensin-like protein 3	-2.88
Qrob_T0097090.2		-2.88
Qrob_T0270670.2	serine carboxypeptidase-like 16, transcript variant X1	-2.87
Qrob_T0724630.2	beta-amyrin 28-monooxygenase-like	-2.86
Qrob_T0543800.2	protein WVD2-like 4, transcript variant X1	-2.86
Qrob_T0246680.2	origin of replication complex subunit 6	-2.85
Qrob_T0090740.2		-2.85
Qrob_T0016650.2	cysteine synthase-like, transcript variant X3	-2.85
Qrob_T0336110.2	BAG family molecular chaperone regulator 4-like	-2.85
Qrob_T0163030.2	uncharacterized LOC115993801	-2.84
Qrob_T0310240.2	GDSL esterase/lipase 1-like	-2.83
Qrob_T0055710.2	serine carboxypeptidase-like 17, transcript variant X2	-2.83
Qrob_T0446440.2	expansin-B3-like	-2.82
Qrob_T0182840.2	uncharacterized LOC115987163	-2.82
Qrob_T0116300.2	cell division cycle-associated protein 7-like	-2.82
Qrob_T0667640.2	uncharacterized LOC115951877	-2.82
Qrob_T0712040.2	kinesin-like protein KIN-14R	-2.81
Qrob_T0270930.2	uncharacterized LOC115978411	-2.81
Qrob_T0523510.2	trichohyalin	-2.81
Qrob_T0100740.2		-2.81
Qrob_T0598320.2	serine/threonine-protein kinase RUNKEL-like	-2.8
Qrob_T0472300.2		-2.8
Qrob_T0264480.2	uncharacterized LOC115970871	-2.8
Qrob_T0099230.2	probable xyloglucan endotransglucosylase/hydrolase protein 6	-2.8
Qrob_T0671090.2		-2.8
Qrob_T0420920.2	uncharacterized LOC115978230	-2.79
Qrob_T0277920.2	muscle M-line assembly protein unc-89, transcript variant X2	-2.79
Qrob_T0576730.2	kinesin-like protein KIN-10B, transcript variant X1	-2.79
Qrob_T0327610.2	fasciclin-like arabinogalactan protein 11	-2.79
Qrob_T0440030.2	probable pectinesterase/pectinesterase inhibitor 7, transcript variant X1	-2.78
Qrob_T0091080.2		-2.78
Qrob_T0112990.2	uncharacterized LOC115954293, transcript variant X2	-2.78
Qrob_T0682800.2	probable pectate lyase 5	-2.77
Qrob_T0245260.2	36.4 kDa proline-rich protein, transcript variant X3	-2.76
Qrob_T0357210.2	GATA transcription factor 9-like	-2.76
Qrob_T0634480.2		-2.76
Qrob_T0278520.2	probable xyloglucan endotransglucosylase/hydrolase protein 23	-2.75
Qrob_T0613580.2	G-type lectin S-receptor-like serine/threonine-protein kinase At4g03230	-2.75
Qrob_T0404950.2	multicopper oxidase LPR1-like	-2.74
Qrob_T0199030.2	uncharacterized LOC115982599	-2.74
Qrob_T0194780.2	ethylene-responsive transcription factor 13-like	-2.74
Qrob_T0378930.2	extensin-like	-2.73
Qrob_T0084340.2	cytochrome P450 CYP749A22-like	-2.72
Qrob_T0422530.2	putative laccase-9	-2.72
Qrob_T0503490.2	ferric reduction oxidase 7, chloroplastic-like, transcript variant X2	-2.72
Qrob_T0391520.2	short-chain dehydrogenase reductase 2a	-2.72
Qrob_T0618910.2	acyl-protein thioesterase 1 homolog 1-like	-2.72
Qrob_T0533460.2	probable pectinesterase 53, transcript variant X1	-2.72
Qrob_T0033020.2	senescence-associated carboxylesterase 101-like, transcript variant X2	-2.72
Qrob_T0032980.2	gibberellin-regulated protein 14-like	-2.71
Qrob_T0089970.2	early nodulin-like protein 1	-2.71
Qrob_T0743810.2	probable xyloglucan glycosyltransferase 5	-2.71
Qrob_T0563350.2	kinesin-like protein KIN-8A, transcript variant X4	-2.71
Qrob_T0751090.2		-2.71
Qrob_T0207500.2	uncharacterized LOC115955229	-2.7
Qrob_T0056900.2	non-functional NADPH-dependent codeinone reductase 2-like	-2.7
Qrob_T0124230.2	bark storage protein A-like	-2.7
Qrob_T0256110.2		-2.7
Qrob_T0310320.2	GDSL esterase/lipase 4-like	-2.7
Qrob_T0238590.2	IST1-like protein	-2.69
Qrob_T0177560.2	uncharacterized LOC115972051	-2.68
Qrob_T0384440.2	WAT1-related protein At5g40230-like	-2.68
Qrob_T0039690.2	aspartic proteinase nepenthesin-1	-2.68
Qrob_T0679300.2	xyloglucan endotransglucosylase/hydrolase 2-like	-2.68
Qrob_T0475670.2	protein DMR6-LIKE OXYGENASE 2-like	-2.67
Qrob_T0742370.2	probable C-terminal domain small phosphatase	-2.67
Qrob_T0609730.2	putative E3 ubiquitin-protein ligase RING1a	-2.67
Qrob_T0586430.2		-2.67
Qrob_T0075780.2	uncharacterized protein At4g38062-like, transcript variant X3	-2.66
Qrob_T0541470.2	21 kDa protein-like	-2.66
Qrob_T0363160.2	ankyrin repeat-containing protein BDA1-like	-2.66
Qrob_T0532300.2	LRR receptor-like serine/threonine-protein kinase RCH1	-2.65
Qrob_T0224430.2	fimbrin-2	-2.65
Qrob_T0434090.2	protein FIZZY-RELATED 3	-2.65
Qrob_T0596870.2	uncharacterized LOC115995072, transcript variant X2	-2.65
Qrob_T0541130.2	uncharacterized LOC115983168, transcript variant X1	-2.65
Qrob_T0020000.2	acylsugar acyltransferase 3-like	-2.65
Qrob_T0068210.2	uncharacterized LOC115977165	-2.64
Qrob_T0304400.2	calcium-binding protein CML37-like	-2.64
Qrob_T0338930.2	uncharacterized protein At1g08160-like	-2.64
Qrob_T0135890.2	acid phosphatase 1-like	-2.63
Qrob_T0682320.2	(+)-neomenthol dehydrogenase	-2.63
Qrob_T0282170.2	uncharacterized LOC115974826	-2.63
Qrob_T0742260.2	uncharacterized LOC115976925, transcript variant X3	-2.62
Qrob_T0161450.2	UPF0057 membrane protein At4g30660-like	-2.62
Qrob_T0422750.2	beta-amyrin 28-monooxygenase-like	-2.62
Qrob_T0056910.2	non-functional NADPH-dependent codeinone reductase 2-like	-2.62
Qrob_T0240920.2		-2.62
Qrob_T0007360.2	amino acid transporter AVT1I-like	-2.61
Qrob_T0269670.2	protein ASYMMETRIC LEAVES 2, transcript variant X4	-2.61
Qrob_T0018120.2	fasciclin-like arabinogalactan protein 12	-2.6
Qrob_T0720260.2	tubby-like protein 8, transcript variant X2	-2.59
Qrob_T0059350.2	UPF0481 protein At3g47200-like, transcript variant X1	-2.59
Qrob_T0633220.2	GATA transcription factor 12-like	-2.58
Qrob_T0430910.2	cationic peroxidase 1-like	-2.57
Qrob_T0510990.2	expansin-A11	-2.57
Qrob_T0375000.2	stellacyanin	-2.57
Qrob_T0467740.2		-2.57
Qrob_T0436340.2	peroxidase 27-like	-2.56
Qrob_T0541830.2		-2.56
Qrob_T0261440.2		-2.56
Qrob_T0096810.2	uncharacterized protein At4g38062, transcript variant X2	-2.56
Qrob_T0531950.2	uncharacterized LOC115966259	-2.56
Qrob_T0048400.2	beta-xylosidase/alpha-L-arabinofuranosidase 2-like	-2.55
Qrob_T0352070.2	thaumatin-like protein	-2.55
Qrob_T0765500.2		-2.55
Qrob_T0279230.2		-2.55
Qrob_T0763000.2	acyl carrier protein 1, chloroplastic-like	-2.55
Qrob_T0280310.2	uncharacterized LOC115990409	-2.55
Qrob_T0241460.2	uncharacterized LOC115953418	-2.55
Qrob_T0181490.2		-2.55
Qrob_T0313850.2	putative calcium-transporting ATPase 13, plasma membrane-type	-2.55
Qrob_T0288390.2	DNA replication licensing factor MCM5	-2.54
Qrob_T0647300.2	kinesin-like protein KIN-5B	-2.54
Qrob_T0479220.2	cytochrome b561 and DOMON domain-containing protein At3g61750	-2.54
Qrob_T0223800.2	probably inactive leucine-rich repeat receptor-like protein kinase IMK2	-2.53
Qrob_T0422510.2	putative laccase-9	-2.53
Qrob_T0715590.2	transcription factor bHLH61-like	-2.53
Qrob_T0390500.2	glucan endo-1,3-beta-glucosidase-like	-2.53
Qrob_T0707220.2	probable indole-3-pyruvate monooxygenase YUCCA10	-2.53
Qrob_T0106780.2		-2.52
Qrob_T0696870.2	condensin-2 complex subunit D3	-2.52
Qrob_T0470620.2	exonuclease 1, transcript variant X1	-2.52
Qrob_T0457660.2	LOB domain-containing protein 15	-2.52
Qrob_T0160120.2	putative cyclin-A3-1	-2.52
Qrob_T0297690.2	putative calcium-transporting ATPase 13, plasma membrane-type	-2.52
Qrob_T0474980.2	cysteine-rich repeat secretory protein 38-like	-2.52
Qrob_T0291050.2		-2.52
Qrob_T0007990.2	DNA (cytosine-5)-methyltransferase CMT3	-2.51
Qrob_T0346420.2	protein POLLENLESS 3-LIKE 2	-2.51
Qrob_T0698130.2	serine/threonine-protein kinase Aurora-1	-2.51
Qrob_T0102710.2	uncharacterized LOC115979746	-2.51
Qrob_T0171640.2	ent-kaurene oxidase, chloroplastic-like	-2.51
Qrob_T0560590.2	acid phosphatase 1-like	-2.51
Qrob_T0139410.2	DNA topoisomerase 2-like	-2.5
Qrob_T0018220.2	uncharacterized LOC115964183, transcript variant X2	-2.49
Qrob_T0069980.2	protein EDS1-like	-2.49
Qrob_T0206020.2	dehydrin ERD14-like	-2.49
Qrob_T0187460.2	double-stranded RNA-binding protein 5, transcript variant X1	-2.49
Qrob_T0568550.2	14-3-3-like protein GF14 iota	-2.48
Qrob_T0477140.2	serine/threonine-protein kinase TIO, transcript variant X3	-2.48
Qrob_T0064600.2	uncharacterized LOC115988779	-2.48
Qrob_T0425450.2	uncharacterized LOC115973662, transcript variant X2	-2.47
Qrob_T0443190.2	uncharacterized LOC115988398, transcript variant X2	-2.47
Qrob_T0463170.2	thioredoxin H5-like	-2.47
Qrob_T0081130.2	peroxidase 45-like, transcript variant X2	-2.47
Qrob_T0178160.2	uncharacterized LOC115975194, transcript variant X3	-2.47
Qrob_T0577740.2	uncharacterized LOC115994904, transcript variant X2	-2.47
Qrob_T0289650.2	uncharacterized LOC115953724	-2.47
Qrob_T0721430.2	CRIB domain-containing protein RIC10-like, transcript variant X2	-2.47
Qrob_T0132650.2	dirigent protein 16-like	-2.47
Qrob_T0180340.2	cytokinin dehydrogenase 1-like	-2.47
Qrob_T0636880.2	sister chromatid cohesion 1 protein 3	-2.47
Qrob_T0224390.2	tubulin alpha chain-like	-2.46
Qrob_T0035350.2	uncharacterized LOC115994955	-2.46
Qrob_T0202290.2	uncharacterized LOC115981641	-2.46
Qrob_T0731770.2	dirigent protein 22-like	-2.46
Qrob_T0290630.2	uncharacterized LOC115973455, transcript variant X3	-2.46
Qrob_T0532510.2	uncharacterized LOC115961831	-2.45
Qrob_T0417130.2		-2.45
Qrob_T0412150.2		-2.44
Qrob_T0263100.2	laccase-14-like	-2.44
Qrob_T0448430.2	uncharacterized protein At1g05835	-2.44
Qrob_T0516110.2	uncharacterized LOC115957305	-2.44
Qrob_T0367140.2	fasciclin-like arabinogalactan protein 2	-2.43
Qrob_T0713590.2	peroxidase 51-like, transcript variant X1	-2.43
Qrob_T0200780.2	APC membrane recruitment protein 1	-2.43
Qrob_T0064140.2	structural maintenance of chromosomes protein 4	-2.43
Qrob_T0396680.2	aspartyl protease AED3	-2.43
Qrob_T0019870.2		-2.43
Qrob_T0390410.2	glucan endo-1,3-beta-glucosidase-like	-2.43
Qrob_T0603090.2	peregrin	-2.43
Qrob_T0297660.2	UDP-glycosyltransferase 92A1-like	-2.43
Qrob_T0747960.2	TORTIFOLIA1-like protein 2, transcript variant X2	-2.42
Qrob_T0145170.2	kinesin-like protein KIN-14L	-2.42
Qrob_T0679250.2	transcription factor PAR2	-2.42
Qrob_T0376590.2	protein EXORDIUM-like	-2.42
Qrob_T0151000.2	dirigent protein 23-like	-2.42
Qrob_T0184690.2	major allergen Pru ar 1-like	-2.41
Qrob_T0510980.2	peroxidase 64-like	-2.41
Qrob_T0310940.2		-2.41
Qrob_T0569270.2		-2.41
Qrob_T0706060.2	mitotic checkpoint serine/threonine-protein kinase BUB1	-2.41
Qrob_T0222600.2	cell division cycle 20.2, cofactor of APC complex-like	-2.41
Qrob_T0175490.2		-2.4
Qrob_T0610270.2	acetylserotonin O-methyltransferase-like	-2.4
Qrob_T0296080.2	salicylate carboxymethyltransferase-like	-2.4
Qrob_T0438200.2	probable xyloglucan endotransglucosylase/hydrolase protein 8	-2.39
Qrob_T0257170.2		-2.39
Qrob_T0166070.2	pectinesterase inhibitor 4-like	-2.39
Qrob_T0383670.2	inactive protein RESTRICTED TEV MOVEMENT 2-like	-2.39
Qrob_T0246000.2	serine carboxypeptidase-like 18	-2.38
Qrob_T0055750.2	serine carboxypeptidase-like 18	-2.38
Qrob_T0520410.2	amino acid transporter AVT1D-like	-2.38
Qrob_T0085390.2	uncharacterized LOC115991989	-2.38
Qrob_T0468600.2	putative nuclear RNA export factor SDE5, transcript variant X6	-2.38
Qrob_T0226150.2	subtilisin-like protease SBT5.3	-2.38
Qrob_T0637800.2	major latex allergen Hev b 5-like	-2.37
Qrob_T0137120.2	probable methyltransferase PMT14, transcript variant X3	-2.37
Qrob_T0086550.2	GDSL esterase/lipase At1g31550-like, transcript variant X2	-2.37
Qrob_T0495540.2		-2.37
Qrob_T0623100.2	protein IQ-DOMAIN 1-like	-2.37
Qrob_T0157110.2	endoglucanase 3-like	-2.37
Qrob_T0121330.2	protein WVD2-like 7, transcript variant X1	-2.37
Qrob_T0743100.2	protein yippee-like At4g27745	-2.37
Qrob_T0089680.2		-2.37
Qrob_T0314790.2	leucine-rich repeat extensin-like protein 2	-2.36
Qrob_T0462470.2	reticulon-like protein B17	-2.36
Qrob_T0208110.2	putative laccase-9, transcript variant X2	-2.36
Qrob_T0676290.2	thaumatin-like protein 1	-2.36
Qrob_T0417180.2		-2.36
Qrob_T0055400.2	protein SPIRAL1-like 2	-2.35
Qrob_T0454760.2	probable RNA-binding protein ARP1, transcript variant X1	-2.35
Qrob_T0120110.2	FT-interacting protein 7	-2.35
Qrob_T0343710.2		-2.35
Qrob_T0211060.2	protein SAR DEFICIENT 1-like	-2.35
Qrob_T0331720.2		-2.35
Qrob_T0048660.2	peroxidase N1-like	-2.35
Qrob_T0252840.2	probable calcium-binding protein CML43	-2.35
Qrob_T0260720.2	putative protein TPRXL	-2.35
Qrob_T0055430.2	protein LONGIFOLIA 2-like, transcript variant X3	-2.34
Qrob_T0475490.2	uncharacterized LOC115976977	-2.34
Qrob_T0113950.2	remorin 4.1	-2.34
Qrob_T0011750.2	uncharacterized LOC115964135	-2.34
Qrob_T0018710.2	glycosyltransferase BC10, transcript variant X3	-2.34
Qrob_T0333040.2	uncharacterized LOC115984088	-2.34
Qrob_T0086540.2	GDSL esterase/lipase At1g31550-like, transcript variant X1	-2.34
Qrob_T0119030.2	(-)-germacrene D synthase-like	-2.34
Qrob_T0178990.2	kinesin-like protein KIN-14S, transcript variant X2	-2.33
Qrob_T0728470.2		-2.33
Qrob_T0237570.2	dirigent protein 22-like	-2.33
Qrob_T0764940.2	protein EXORDIUM-like	-2.33
Qrob_T0379130.2	14 kDa proline-rich protein DC2.15-like	-2.32
Qrob_T0097660.2	serine/threonine-protein kinase MPS1, transcript variant X1	-2.32
Qrob_T0686120.2	GATA transcription factor 2-like	-2.32
Qrob_T0652490.2	cytochrome P450 714C2-like	-2.32
Qrob_T0631340.2	LEAF RUST 10 DISEASE-RESISTANCE LOCUS RECEPTOR-LIKE PROTEIN KINASE-like 1.2	-2.32
Qrob_T0376540.2	protein EXORDIUM-like, transcript variant X2	-2.32
Qrob_T0184670.2	major allergen Pru ar 1-like	-2.31
Qrob_T0111030.2	serine carboxypeptidase-like 51, transcript variant X1	-2.31
Qrob_T0739270.2	uncharacterized LOC115953302	-2.31
Qrob_T0564880.2	cyclin-A2-2-like, transcript variant X4	-2.31
Qrob_T0366610.2	probably inactive receptor-like protein kinase At2g46850	-2.31
Qrob_T0186030.2	putative receptor protein kinase ZmPK1	-2.31
Qrob_T0038900.2	protein gamma response 1-like	-2.31
Qrob_T0307980.2	uncharacterized LOC115980434	-2.31
Qrob_T0452200.2	gibberellin-regulated protein 6, transcript variant X2	-2.3
Qrob_T0086610.2	GDSL esterase/lipase At1g28580-like	-2.3
Qrob_T0066860.2	endoglucanase 8-like, transcript variant X1	-2.3
Qrob_T0505050.2	basic leucine zipper 61-like	-2.3
Qrob_T0357060.2	uncharacterized LOC115990141	-2.3
Qrob_T0593520.2	GDSL esterase/lipase At4g10955-like	-2.3
Qrob_T0030410.2	MLP-like protein 423	-2.3
Qrob_T0533780.2		-2.3
Qrob_T0614500.2	uncharacterized LOC115986419	-2.29
Qrob_T0167770.2	syntaxin-related protein KNOLLE	-2.29
Qrob_T0196890.2	G2/mitotic-specific cyclin-2, transcript variant X2	-2.29
Qrob_T0585180.2	protein IQ-DOMAIN 1	-2.29
Qrob_T0191730.2	cyclin-A1-1-like, transcript variant X1	-2.29
Qrob_T0055720.2	serine carboxypeptidase-like 17, transcript variant X1	-2.28
Qrob_T0542970.2	caffeic acid 3-O-methyltransferase-like	-2.28
Qrob_T0311870.2	putative F-box protein At1g49610	-2.28
Qrob_T0126540.2		-2.28
Qrob_T0578930.2	cyclin-A2-3-like, transcript variant X1	-2.28
Qrob_T0236790.2	LOB domain-containing protein 12	-2.28
Qrob_T0589330.2	BTB/POZ domain-containing protein At3g22104, transcript variant X1	-2.28
Qrob_T0107940.2	F-box protein CPR1-like, transcript variant X2	-2.28
Qrob_T0170870.2	7-deoxyloganetin glucosyltransferase-like, transcript variant X2	-2.27
Qrob_T0523140.2	novel plant SNARE 11-like, transcript variant X4	-2.27
Qrob_T0459650.2	protein trichome birefringence-like 19	-2.27
Qrob_T0637070.2	glutamic acid-rich protein-like	-2.27
Qrob_T0172910.2	uncharacterized membrane protein At3g27390-like, transcript variant X3	-2.27
Qrob_T0099630.2	transcription repressor MYB5-like	-2.27
Qrob_T0719040.2	fasciclin-like arabinogalactan protein 7	-2.26
Qrob_T0453780.2	uncharacterized LOC115966103, transcript variant X2	-2.26
Qrob_T0409780.2	metalloendoproteinase 2-MMP-like	-2.26
Qrob_T0730000.2	cellulose synthase-like protein D5	-2.25
Qrob_T0703760.2	leucine-rich repeat extensin-like protein 6	-2.25
Qrob_T0413560.2	uncharacterized LOC115950645	-2.25
Qrob_T0274450.2	cyclic nucleotide-gated ion channel 1-like	-2.25
Qrob_T0683630.2	uncharacterized LOC115991095	-2.25
Qrob_T0721840.2	phosphatidylinositol 4-kinase gamma 4-like	-2.24
Qrob_T0613160.2	high mobility group B protein 6-like	-2.24
Qrob_T0109780.2	rac-like GTP-binding protein ARAC7	-2.24
Qrob_T0337570.2		-2.24
Qrob_T0398210.2	aquaporin TIP1-3	-2.23
Qrob_T0359360.2	replication protein A 70 kDa DNA-binding subunit B	-2.23
Qrob_T0405400.2	probable 2-oxoglutarate-dependent dioxygenase AOP1	-2.23
Qrob_T0202050.2	kinesin-like protein KIN-14G	-2.23
Qrob_T0424050.2	protein trichome birefringence-like 41	-2.23
Qrob_T0404590.2	histone-lysine N-methyltransferase ATXR6	-2.23
Qrob_T0205100.2	uncharacterized LOC115977767	-2.22
Qrob_T0503480.2	ferric reduction oxidase 7, chloroplastic-like, transcript variant X1	-2.22
Qrob_T0074210.2	uncharacterized LOC115956085	-2.22
Qrob_T0424040.2	protein trichome birefringence-like 41	-2.22
Qrob_T0254680.2	uncharacterized LOC115965977	-2.22
Qrob_T0367160.2	uncharacterized LOC115988117, transcript variant X1	-2.22
Qrob_T0128950.2	uncharacterized LOC115979046, transcript variant X2	-2.22
Qrob_T0619130.2	probable DNA double-strand break repair Rad50 ATPase, transcript variant X2	-2.21
Qrob_T0001950.2	uncharacterized LOC115995024	-2.21
Qrob_T0424680.2	LRR receptor-like serine/threonine-protein kinase EFR	-2.21
Qrob_T0426010.2		-2.21
Qrob_T0632380.2	cyclin-dependent kinase B2-2	-2.2
Qrob_T0648200.2	kinesin-like protein KIN-12E	-2.2
Qrob_T0590960.2	cytochrome P450 87A3, transcript variant X2	-2.2
Qrob_T0189290.2	protein CHROMATIN REMODELING 24, transcript variant X1	-2.19
Qrob_T0325510.2	kinesin-like protein KIN-12D	-2.19
Qrob_T0315170.2	stress-response A/B barrel domain-containing protein At5g22580	-2.18
Qrob_T0568560.2	triose phosphate/phosphate translocator, chloroplastic-like	-2.18
Qrob_T0336040.2	EH domain-containing protein 1-like	-2.18
Qrob_T0173130.2		-2.18
Qrob_T0102830.2		-2.18
Qrob_T0520420.2	aspartic proteinase PCS1	-2.18
Qrob_T0389950.2	zinc transporter 8-like	-2.18
Qrob_T0103840.2	zinc transporter 1-like	-2.18
Qrob_T0113910.2		-2.18
Qrob_T0748810.2	uncharacterized protein At1g65710-like	-2.17
Qrob_T0381230.2	protein SIEVE ELEMENT OCCLUSION B-like	-2.17
Qrob_T0457180.2	WRKY DNA-binding transcription factor 70	-2.17
Qrob_T0535680.2	5'-nucleotidase SurE 1-like	-2.17
Qrob_T0187390.2	glutaredoxin-C1-like	-2.17
Qrob_T0162980.2	uncharacterized LOC115993631	-2.17
Qrob_T0475680.2		-2.17
Qrob_T0619580.2	ATP sulfurylase 2	-2.17
Qrob_T0277650.2	beta-glucosidase 13-like	-2.17
Qrob_T0440910.2		-2.16
Qrob_T0655200.2	probable aspartyl protease At4g16563	-2.16
Qrob_T0149640.2	protein BREAST CANCER SUSCEPTIBILITY 1 homolog	-2.16
Qrob_T0277730.2		-2.16
Qrob_T0390890.2	cell cycle serine/threonine-protein kinase hsk1-like	-2.16
Qrob_T0317690.2		-2.16
Qrob_T0316480.2	kinesin-like protein NACK1	-2.15
Qrob_T0489160.2	histone H2A variant 1	-2.15
Qrob_T0027740.2	kinesin-like protein KIN-12B	-2.15
Qrob_T0112010.2		-2.15
Qrob_T0647490.2	metalloendoproteinase 2-MMP-like	-2.15
Qrob_T0268800.2	L-ascorbate oxidase-like	-2.15
Qrob_T0395570.2	glucan endo-1,3-beta-glucosidase 13-like	-2.14
Qrob_T0004560.2	OVARIAN TUMOR DOMAIN-containing deubiquitinating enzyme 12-like, transcript variant X3	-2.14
Qrob_T0002940.2	putative SNAP25 homologous protein SNAP30, transcript variant X2	-2.14
Qrob_T0240780.2	protein LURP-one-related 5-like	-2.14
Qrob_T0585140.2	uncharacterized LOC115955313	-2.14
Qrob_T0396020.2	uclacyanin 1-like	-2.13
Qrob_T0112740.2	trehalose-phosphate phosphatase A-like, transcript variant X4	-2.13
Qrob_T0737550.2	uncharacterized LOC115964170	-2.13
Qrob_T0630810.2		-2.13
Qrob_T0723230.2	membrane protein PM19L	-2.13
Qrob_T0296640.2	protein WALLS ARE THIN 1-like	-2.13
Qrob_T0697020.2	transcription factor UPBEAT1	-2.13
Qrob_T0321590.2	probable trehalose-phosphate phosphatase 2	-2.13
Qrob_T0243920.2	exocyst complex component EXO70B1-like	-2.12
Qrob_T0152500.2		-2.12
Qrob_T0263610.2	FHA domain-containing protein PS1, transcript variant X1	-2.12
Qrob_T0641180.2	F-box protein At1g10780, transcript variant X2	-2.12
Qrob_T0307490.2	GDP-mannose transporter GONST2-like, transcript variant X2	-2.12
Qrob_T0019170.2	protein NETWORKED 3A-like	-2.12
Qrob_T0613620.2	indole-3-acetic acid-amido synthetase GH3.6-like	-2.12
Qrob_T0000290.2	36.4 kDa proline-rich protein-like, transcript variant X1	-2.11
Qrob_T0280050.2	expansin-A8-like	-2.11
Qrob_T0686490.2	auxin transporter-like protein 3	-2.11
Qrob_T0172570.2	L-ascorbate oxidase homolog	-2.11
Qrob_T0257130.2	histone H3.2	-2.11
Qrob_T0304300.2		-2.11
Qrob_T0159430.2	crocetin glucosyltransferase, chloroplastic-like	-2.11
Qrob_T0490530.2	protein SIEVE ELEMENT OCCLUSION B-like	-2.11
Qrob_T0662760.2	tubulin beta chain-like	-2.1
Qrob_T0125660.2	beta-galactosidase 3-like	-2.1
Qrob_T0149620.2	BAG family molecular chaperone regulator 3-like	-2.1
Qrob_T0270750.2		-2.1
Qrob_T0261170.2		-2.1
Qrob_T0215520.2	glutathione S-transferase-like	-2.1
Qrob_T0618320.2	protein NRT1/ PTR FAMILY 4.5-like	-2.1
Qrob_T0376520.2	protein EXORDIUM-like, transcript variant X2	-2.1
Qrob_T0547250.2		-2.1
Qrob_T0365410.2		-2.09
Qrob_T0204700.2	L-ascorbate oxidase homolog	-2.09
Qrob_T0605380.2	fasciclin-like arabinogalactan protein 13	-2.09
Qrob_T0304830.2	uncharacterized LOC115974772	-2.09
Qrob_T0095840.2	protein S-acyltransferase 18	-2.09
Qrob_T0464430.2	uncharacterized LOC115959295	-2.09
Qrob_T0047110.2	uncharacterized LOC115965382	-2.09
Qrob_T0686470.2		-2.09
Qrob_T0161420.2	protein MULTIPOLAR SPINDLE 1	-2.09
Qrob_T0316050.2	caffeic acid 3-O-methyltransferase-like	-2.09
Qrob_T0275650.2	serine/threonine-protein kinase RUNKEL	-2.08
Qrob_T0624850.2	probable pectinesterase/pectinesterase inhibitor 41	-2.08
Qrob_T0184680.2	major allergen Pru ar 1-like	-2.08
Qrob_T0641280.2		-2.08
Qrob_T0171660.2	ent-kaurene oxidase, chloroplastic-like	-2.08
Qrob_T0695580.2	uncharacterized LOC115975244, transcript variant X2	-2.08
Qrob_T0505550.2		-2.08
Qrob_T0110250.2	START domain-containing protein 10	-2.08
Qrob_T0247850.2	vacuolar iron transporter 1	-2.08
Qrob_T0674340.2	zinc finger protein CONSTANS-LIKE 1-like	-2.08
Qrob_T0691620.2	laccase-15-like	-2.08
Qrob_T0160140.2	putative cyclin-A3-1	-2.08
Qrob_T0764960.2	protein EXORDIUM-like	-2.08
Qrob_T0592840.2		-2.08
Qrob_T0368400.2	protein PLANT CADMIUM RESISTANCE 2-like	-2.08
Qrob_T0714230.2	cell division control protein 2 homolog C	-2.07
Qrob_T0386280.2	uncharacterized LOC115957489	-2.07
Qrob_T0038370.2	UPF0481 protein At3g47200-like, transcript variant X1	-2.07
Qrob_T0064480.2	auxin efflux carrier component 2, transcript variant X1	-2.06
Qrob_T0291000.2	histone H2AX-like	-2.06
Qrob_T0714450.2	histone H4	-2.06
Qrob_T0200070.2		-2.06
Qrob_T0251450.2	uncharacterized LOC115968651	-2.06
Qrob_T0151690.2	glutathione S-transferase-like	-2.06
Qrob_T0438480.2	laccase-11-like	-2.06
Qrob_T0514610.2		-2.06
Qrob_T0237600.2	dirigent protein 22-like	-2.06
Qrob_T0371350.2	COBRA-like protein 4	-2.06
Qrob_T0623080.2	protein BRANCHLESS TRICHOME	-2.06
Qrob_T0105520.2	glycosyltransferase BC10-like	-2.06
Qrob_T0337540.2	laccase-15-like	-2.05
Qrob_T0304290.2	uncharacterized LOC115974734, transcript variant X4	-2.05
Qrob_T0689490.2	high mobility group B protein 7-like	-2.05
Qrob_T0360070.2		-2.05
Qrob_T0715790.2	chaperone protein dnaJ 10-like	-2.05
Qrob_T0245380.2	transcription factor MYB82-like	-2.05
Qrob_T0090580.2	kinesin-like protein KIN-5C	-2.04
Qrob_T0643290.2	kinesin-like protein KIN-14N, transcript variant X1	-2.04
Qrob_T0350390.2	polygalacturonase-1 non-catalytic subunit beta-like, transcript variant X2	-2.04
Qrob_T0262840.2	1-aminocyclopropane-1-carboxylate oxidase 5	-2.04
Qrob_T0659070.2	protein trichome birefringence-like 37	-2.04
Qrob_T0410380.2	2-succinylbenzoate--CoA ligase, chloroplastic/peroxisomal	-2.04
Qrob_T0135090.2	probable xyloglucan endotransglucosylase/hydrolase protein B	-2.03
Qrob_T0728280.2	pectin acetylesterase 6-like	-2.03
Qrob_T0532490.2	3-ketoacyl-CoA thiolase 2, peroxisomal-like	-2.03
Qrob_T0499190.2	peroxidase 5-like	-2.03
Qrob_T0178960.2	mitogen-activated protein kinase kinase kinase ANP1, transcript variant X1	-2.03
Qrob_T0089590.2		-2.03
Qrob_T0415270.2		-2.03
Qrob_T0249630.2	kinesin-like protein KIN-12F	-2.03
Qrob_T0629140.2	monocopper oxidase-like protein SKU5	-2.02
Qrob_T0073730.2	pectin acetylesterase 8-like, transcript variant X2	-2.02
Qrob_T0615950.2	DNA replication licensing factor MCM2	-2.02
Qrob_T0215010.2	probable glucan 1,3-beta-glucosidase A	-2.02
Qrob_T0507960.2	origin of replication complex subunit 1B-like	-2.02
Qrob_T0629540.2	aspartate carbamoyltransferase 2, chloroplastic-like, transcript variant X3	-2.02
Qrob_T0037300.2	cell division control protein 45 homolog	-2.02
Qrob_T0127910.2	cysteine-rich repeat secretory protein 55-like	-2.02
Qrob_T0434850.2	histone H3.2	-2.01
Qrob_T0434860.2	histone H3.2	-2.01
Qrob_T0489140.2	protein LONGIFOLIA 1	-2.01
Qrob_T0527760.2	putative pectinesterase 11	-2.01
Qrob_T0438420.2	putative pectinesterase 11	-2.01
Qrob_T0337660.2	laccase-14-like	-2.01
Qrob_T0005830.2	putative exosome complex component rrp40	-2.01
Qrob_T0334850.2	GDSL esterase/lipase LTL1-like	-2.01
Qrob_T0751910.2	separase, transcript variant X1	-2.01
Qrob_T0614850.2		-2.01
Qrob_T0219700.2	protein IMPAIRED IN BABA-INDUCED STERILITY 1-like	-2.01
Qrob_T0633130.2	uncharacterized N-acetyltransferase p20-like	-2.01
Qrob_T0590500.2	cucumisin-like	-2
Qrob_T0265960.2	interactor of constitutive active ROPs 2, chloroplastic, transcript variant X7	-2
Qrob_T0491690.2	LRR receptor-like serine/threonine-protein kinase IOS1	-2
Qrob_T0160480.2	PLASMODESMATA CALLOSE-BINDING PROTEIN 5	-2
Qrob_T0201840.2	uncharacterized LOC115954421	-2
Qrob_T0386220.2	uncharacterized LOC115955542	-2
Qrob_T0684410.2	lupeol synthase-like, transcript variant X2	-2
Qrob_T0504600.2		-2
Qrob_T0121030.2	protein SIEVE ELEMENT OCCLUSION B-like	-2
Qrob_T0051100.2	TMV resistance protein N-like, transcript variant X11	-2
Qrob_T0208720.2	bifunctional 3-dehydroquinate dehydratase/shikimate dehydrogenase, chloroplastic-like	-1.99
Qrob_T0436350.2	peroxidase 27-like	-1.99
Qrob_T0199220.2	histone H2A.1-like	-1.99
Qrob_T0602910.2	7-deoxyloganetin glucosyltransferase-like, transcript variant X1	-1.99
Qrob_T0004110.2	protein trichome birefringence-like 33	-1.99
Qrob_T0405360.2	cytochrome P450 71A1-like	-1.99
Qrob_T0555640.2	uncharacterized LOC115962796	-1.99
Qrob_T0679290.2	xyloglucan endotransglucosylase/hydrolase 2-like	-1.99
Qrob_T0491400.2		-1.99
Qrob_T0649270.2	CEN-like protein 2	-1.99
Qrob_T0213950.2	secoisolariciresinol dehydrogenase-like	-1.99
Qrob_T0151020.2	dirigent protein 23-like	-1.99
Qrob_T0457770.2	nucleobase-ascorbate transporter 1, transcript variant X1	-1.99
Qrob_T0200050.2		-1.98
Qrob_T0032660.2	WAT1-related protein At5g40240-like	-1.98
Qrob_T0031950.2	polygalacturonase-like	-1.98
Qrob_T0032240.2		-1.98
Qrob_T0371160.2	protein SINE1	-1.98
Qrob_T0656520.2	thymidine kinase a	-1.98
Qrob_T0297680.2	putative calcium-transporting ATPase 13, plasma membrane-type	-1.98
Qrob_T0631170.2	granule-bound starch synthase 1, chloroplastic/amyloplastic-like	-1.98
Qrob_T0047960.2		-1.98
Qrob_T0542790.2	heat shock protein 83-like	-1.98
Qrob_T0447130.2		-1.97
Qrob_T0102690.2	inactive leucine-rich repeat receptor-like serine/threonine-protein kinase At1g60630	-1.97
Qrob_T0039170.2	dirigent protein 22-like	-1.97
Qrob_T0422460.2	3-ketoacyl-CoA synthase 11-like, transcript variant X2	-1.97
Qrob_T0030020.2	uncharacterized LOC115978003	-1.97
Qrob_T0660290.2	laccase-2-like, transcript variant X3	-1.97
Qrob_T0464290.2	histone-lysine N-methyltransferase ASHR3, transcript variant X2	-1.97
Qrob_T0136520.2		-1.97
Qrob_T0022090.2		-1.96
Qrob_T0151720.2	glutathione S-transferase-like	-1.96
Qrob_T0558880.2	kinesin-like protein KIN-14I	-1.96
Qrob_T0055740.2		-1.96
Qrob_T0724710.2	uncharacterized LOC115982366	-1.96
Qrob_T0440040.2	probable pectinesterase/pectinesterase inhibitor 7	-1.96
Qrob_T0336900.2	40S ribosomal protein S15a-5	-1.96
Qrob_T0659080.2	protein trichome birefringence-like 37	-1.96
Qrob_T0496450.2	ethylene-responsive transcription factor LEP	-1.96
Qrob_T0126550.2	BTB/POZ domain-containing protein At3g56230, transcript variant X1	-1.96
Qrob_T0337680.2	laccase-14-like	-1.95
Qrob_T0548600.2	14 kDa proline-rich protein DC2.15-like	-1.95
Qrob_T0375870.2	structural maintenance of chromosomes protein 2-1-like	-1.95
Qrob_T0542070.2	cytochrome B5-like protein, transcript variant X2	-1.95
Qrob_T0037260.2	oleoyl-acyl carrier protein thioesterase 1, chloroplastic-like	-1.95
Qrob_T0384750.2	uncharacterized LOC115981981	-1.95
Qrob_T0159870.2	probable receptor-like protein kinase At1g30570	-1.95
Qrob_T0559380.2		-1.95
Qrob_T0764920.2	protein EXORDIUM-like	-1.95
Qrob_T0211090.2	glycosyltransferase BC10-like	-1.95
Qrob_T0051840.2		-1.95
Qrob_T0483980.2	GDSL esterase/lipase At3g27950-like	-1.94
Qrob_T0689720.2		-1.94
Qrob_T0765510.2		-1.94
Qrob_T0386960.2		-1.94
Qrob_T0351430.2	serine/threonine-protein kinase D6PK	-1.94
Qrob_T0052280.2		-1.94
Qrob_T0707030.2	HVA22-like protein f	-1.94
Qrob_T0222240.2	ferric reduction oxidase 7, chloroplastic-like	-1.93
Qrob_T0485300.2		-1.93
Qrob_T0340950.2	COP1-interacting protein 7, transcript variant X2	-1.93
Qrob_T0322480.2	bidirectional sugar transporter SWEET1-like, transcript variant X2	-1.93
Qrob_T0152380.2	uncharacterized LOC115959775	-1.93
Qrob_T0383130.2	gamma-interferon-responsive lysosomal thiol protein	-1.93
Qrob_T0564170.2	DNA replication licensing factor MCM3, transcript variant X2	-1.92
Qrob_T0338890.2	probable histone H2B.1	-1.92
Qrob_T0504410.2	protein DETOXIFICATION 12-like	-1.92
Qrob_T0015970.2		-1.92
Qrob_T0319920.2	uncharacterized LOC115974985, transcript variant X3	-1.92
Qrob_T0318340.2	inactive protein kinase SELMODRAFT_444075-like	-1.92
Qrob_T0663580.2	uncharacterized LOC115992527	-1.92
Qrob_T0250400.2	heat shock cognate protein 80	-1.91
Qrob_T0369710.2	uncharacterized LOC115975007	-1.91
Qrob_T0478860.2	serine/threonine-protein kinase WAG2-like	-1.91
Qrob_T0712730.2	cellulose synthase A catalytic subunit 8 [UDP-forming]	-1.91
Qrob_T0039160.2	protein trichome birefringence-like 38	-1.91
Qrob_T0510930.2	probable cinnamyl alcohol dehydrogenase 6	-1.91
Qrob_T0416380.2	cytochrome P450 94B3-like	-1.91
Qrob_T0495470.2	abnormal spindle-like microcephaly-associated protein homolog, transcript variant X1	-1.91
Qrob_T0553890.2	protein JINGUBANG	-1.91
Qrob_T0417970.2	annexin D2	-1.9
Qrob_T0362990.2	expansin-A10-like	-1.9
Qrob_T0119150.2	probable histone H2A.1	-1.9
Qrob_T0502850.2	beta-fructofuranosidase, insoluble isoenzyme CWINV3-like, transcript variant X1	-1.9
Qrob_T0666630.2	nucleolar and coiled-body phosphoprotein 1	-1.9
Qrob_T0595850.2	(6-4)DNA photolyase, transcript variant X1	-1.9
Qrob_T0204640.2	prolyl endopeptidase-like	-1.89
Qrob_T0275340.2	kinesin-like protein KIN-7N	-1.89
Qrob_T0305250.2	GDSL esterase/lipase At1g09390-like	-1.89
Qrob_T0379850.2	E2F transcription factor-like E2FE, transcript variant X1	-1.89
Qrob_T0245130.2	xylogalacturonan beta-1,3-xylosyltransferase-like, transcript variant X1	-1.89
Qrob_T0077340.2	uncharacterized LOC115962822, transcript variant X1	-1.89
Qrob_T0436170.2	mitotic checkpoint serine/threonine-protein kinase BUB1	-1.89
Qrob_T0476910.2	uncharacterized LOC115982183, transcript variant X2	-1.89
Qrob_T0120870.2	cellulose synthase-like protein G3	-1.89
Qrob_T0191740.2	cyclin-A1-4-like	-1.89
Qrob_T0185430.2	uncharacterized LOC115965936	-1.89
Qrob_T0765520.2		-1.88
Qrob_T0119090.2	kinesin-like protein KIN-14C, transcript variant X2	-1.88
Qrob_T0032810.2	alpha-dioxygenase 1-like	-1.88
Qrob_T0187470.2	glycerophosphodiester phosphodiesterase GDPD1, chloroplastic-like	-1.88
Qrob_T0337910.2	origin of replication complex subunit 2	-1.88
Qrob_T0004500.2	uncharacterized LOC115982943, transcript variant X1	-1.88
Qrob_T0006160.2	germin-like protein subfamily 3 member 2	-1.87
Qrob_T0291400.2	germin-like protein subfamily 2 member 4	-1.87
Qrob_T0629530.2		-1.87
Qrob_T0320040.2	late embryogenesis abundant protein At1g64065-like	-1.87
Qrob_T0700100.2	proliferating cell nuclear antigen-like	-1.87
Qrob_T0264380.2	histone H1-like	-1.87
Qrob_T0457650.2	uncharacterized LOC115957617	-1.87
Qrob_T0087430.2	65-kDa microtubule-associated protein 5, transcript variant X1	-1.87
Qrob_T0004060.2	LOB domain-containing protein 12-like	-1.87
Qrob_T0434310.2	glucan endo-1,3-beta-glucosidase	-1.87
Qrob_T0227100.2	9-cis-epoxycarotenoid dioxygenase NCED2, chloroplastic	-1.87
Qrob_T0381300.2	probable pectate lyase 12	-1.87
Qrob_T0393870.2	fatty acyl-CoA reductase 3-like	-1.87
Qrob_T0612660.2	chromosome transmission fidelity protein 8 homolog	-1.87
Qrob_T0608370.2	ABC transporter G family member 4	-1.86
Qrob_T0691310.2	uncharacterized LOC115994902	-1.86
Qrob_T0345480.2	kinesin-like protein KIN-14J, transcript variant X2	-1.86
Qrob_T0188540.2	protein JASON, transcript variant X1	-1.86
Qrob_T0108440.2	aquaporin TIP1-3-like	-1.86
Qrob_T0746170.2	protein TPX2	-1.86
Qrob_T0198840.2	alpha-galactosidase-like, transcript variant X1	-1.86
Qrob_T0439940.2	proline-rich protein 1-like	-1.86
Qrob_T0693400.2	xyloglucan endotransglucosylase/hydrolase 2-like	-1.86
Qrob_T0139910.2	ribosomal RNA small subunit methyltransferase, chloroplastic, transcript variant X1	-1.86
Qrob_T0650120.2	uncharacterized LOC115974400	-1.86
Qrob_T0082950.2	PLASMODESMATA CALLOSE-BINDING PROTEIN 3	-1.86
Qrob_T0221580.2	pyrophosphate-energized vacuolar membrane proton pump, transcript variant X2	-1.85
Qrob_T0234700.2	annexin-like protein RJ4, transcript variant X1	-1.85
Qrob_T0589750.2	glucan endo-1,3-beta-glucosidase 7	-1.85
Qrob_T0578880.2	pectinesterase-like	-1.85
Qrob_T0426050.2	leucine-rich repeat receptor-like tyrosine-protein kinase PXC3, transcript variant X1	-1.85
Qrob_T0679320.2	xyloglucan endotransglucosylase/hydrolase 2-like	-1.85
Qrob_T0107270.2	probable beta-D-xylosidase 2	-1.85
Qrob_T0118780.2	putative receptor-like protein kinase At4g00960	-1.85
Qrob_T0459680.2	protein trichome birefringence-like 19	-1.85
Qrob_T0376790.2	alcohol dehydrogenase-like 1, transcript variant X1	-1.85
Qrob_T0688630.2	flavin-containing monooxygenase FMO GS-OX-like 9	-1.85
Qrob_T0182380.2	O-fucosyltransferase 8, transcript variant X1	-1.85
Qrob_T0749970.2	beta-glucosidase BoGH3B-like, transcript variant X2	-1.84
Qrob_T0530460.2	fasciclin-like arabinogalactan protein 15	-1.84
Qrob_T0702470.2	probable glucan endo-1,3-beta-glucosidase A6	-1.84
Qrob_T0101250.2	L-ascorbate oxidase-like, transcript variant X1	-1.84
Qrob_T0222270.2	ferric reduction oxidase 7, chloroplastic-like	-1.84
Qrob_T0348320.2		-1.84
Qrob_T0457600.2	WEB family protein At2g40480	-1.84
Qrob_T0530100.2	serine/threonine-protein kinase-like protein CCR1	-1.84
Qrob_T0064310.2	sucrose synthase 5-like	-1.84
Qrob_T0597780.2	cysteine-rich receptor-like protein kinase 10	-1.84
Qrob_T0371850.2	secoisolariciresinol dehydrogenase-like	-1.83
Qrob_T0434940.2	histone H3.2	-1.83
Qrob_T0432490.2	monocopper oxidase-like protein SKU5	-1.83
Qrob_T0045500.2	snakin-1-like	-1.83
Qrob_T0304110.2	rop guanine nucleotide exchange factor 5	-1.83
Qrob_T0726370.2	serine carboxypeptidase-like 40	-1.83
Qrob_T0018740.2		-1.83
Qrob_T0610250.2	acetylserotonin O-methyltransferase-like	-1.83
Qrob_T0679310.2	xyloglucan endotransglucosylase/hydrolase 2-like	-1.83
Qrob_T0599820.2	zinc finger CCCH domain-containing protein 62-like	-1.83
Qrob_T0186810.2		-1.83
Qrob_T0459090.2	uncharacterized LOC115963786	-1.83
Qrob_T0208730.2	bifunctional 3-dehydroquinate dehydratase/shikimate dehydrogenase, chloroplastic-like	-1.82
Qrob_T0045250.2	blue copper protein	-1.82
Qrob_T0369660.2	probable boron transporter 7, transcript variant X1	-1.82
Qrob_T0222250.2		-1.82
Qrob_T0062560.2		-1.82
Qrob_T0129300.2	dirigent protein 22-like	-1.82
Qrob_T0528600.2	laccase-15-like	-1.81
Qrob_T0598130.2	uncharacterized LOC115987660	-1.81
Qrob_T0298050.2	protein kinase PVPK-1-like, transcript variant X3	-1.81
Qrob_T0107130.2	DNA replication licensing factor MCM7	-1.81
Qrob_T0107280.2	uncharacterized LOC115972286	-1.81
Qrob_T0090850.2	casparian strip membrane protein 1-like	-1.81
Qrob_T0102700.2	inactive leucine-rich repeat receptor-like serine/threonine-protein kinase At1g60630	-1.81
Qrob_T0050570.2	DNA (cytosine-5)-methyltransferase CMT2-like	-1.81
Qrob_T0403030.2		-1.81
Qrob_T0685110.2		-1.8
Qrob_T0296230.2	bZIP transcription factor 11-like	-1.8
Qrob_T0696430.2	mavicyanin-like	-1.8
Qrob_T0632580.2	caffeoylshikimate esterase, transcript variant X1	-1.8
Qrob_T0289920.2	alcohol dehydrogenase 1-like	-1.8
Qrob_T0280490.2	RING-H2 finger protein ATL16	-1.8
Qrob_T0103770.2		-1.8
Qrob_T0139120.2		-1.8
Qrob_T0731980.2	myosin-12-like	-1.79
Qrob_T0738240.2	3-oxoacyl-[acyl-carrier-protein] reductase FabG, transcript variant X3	-1.79
Qrob_T0018660.2	transcription factor WER-like	-1.79
Qrob_T0245160.2	probable glycosyltransferase At3g42180, transcript variant X1	-1.79
Qrob_T0005920.2	polygalacturonase 1 beta-like protein 3	-1.79
Qrob_T0098170.2	17.6 kDa class II heat shock protein-like	-1.79
Qrob_T0320070.2	late embryogenesis abundant protein At1g64065-like	-1.79
Qrob_T0516090.2	uncharacterized LOC115957289	-1.79
Qrob_T0214940.2	probable beta-D-xylosidase 7	-1.78
Qrob_T0569290.2		-1.78
Qrob_T0543730.2	lamin-like protein	-1.78
Qrob_T0252870.2	auxin-responsive protein SAUR71-like	-1.78
Qrob_T0214150.2	bifunctional nitrilase/nitrile hydratase NIT4B-like, transcript variant X1	-1.78
Qrob_T0032180.2	uncharacterized LOC115965261	-1.78
Qrob_T0593830.2	probable xyloglucan endotransglucosylase/hydrolase protein 10	-1.78
Qrob_T0478230.2	VIN3-like protein 2, transcript variant X2	-1.78
Qrob_T0320670.2	probable transmembrane ascorbate ferrireductase 3	-1.78
Qrob_T0404970.2	multicopper oxidase LPR2-like, transcript variant X2	-1.78
Qrob_T0342600.2	phospho-2-dehydro-3-deoxyheptonate aldolase 2, chloroplastic	-1.77
Qrob_T0248580.2	formin-2	-1.77
Qrob_T0541900.2	tubulin beta-5 chain	-1.77
Qrob_T0058940.2	thaumatin-like protein 1	-1.77
Qrob_T0768990.2	probable inactive receptor kinase At5g58300, transcript variant X3	-1.77
Qrob_T0437790.2	EG45-like domain containing protein 2	-1.77
Qrob_T0136650.2	uncharacterized LOC115988070	-1.77
Qrob_T0705670.2	probable inactive purple acid phosphatase 29	-1.77
Qrob_T0017620.2		-1.77
Qrob_T0681730.2	ankyrin repeat domain-containing protein 13C	-1.77
Qrob_T0515600.2	kinesin-like protein KIN-8B, transcript variant X1	-1.77
Qrob_T0200350.2	peroxidase 73-like	-1.76
Qrob_T0409890.2	MLP-like protein 31	-1.76
Qrob_T0434360.2		-1.76
Qrob_T0184650.2	major allergen Pru ar 1-like	-1.76
Qrob_T0295720.2	laccase-15-like	-1.76
Qrob_T0410430.2	LRR receptor-like serine/threonine-protein kinase GHR1	-1.76
Qrob_T0413500.2		-1.76
Qrob_T0209700.2	laccase-4-like	-1.76
Qrob_T0367610.2	probable xyloglucan glycosyltransferase 5	-1.76
Qrob_T0132410.2	myosin-6-like	-1.76
Qrob_T0265940.2	uncharacterized LOC115954058, transcript variant X1	-1.76
Qrob_T0137380.2	ent-kaurenoic acid oxidase 2-like	-1.76
Qrob_T0034950.2	kinesin-like protein KIN-14R	-1.76
Qrob_T0103090.2	delta(24)-sterol reductase, transcript variant X2	-1.75
Qrob_T0172560.2	L-ascorbate oxidase homolog	-1.75
Qrob_T0036200.2		-1.75
Qrob_T0345020.2	calcium-binding protein KRP1-like	-1.75
Qrob_T0004410.2	putative ALA-interacting subunit 2, transcript variant X2	-1.75
[truncated: 2,282 more rows]
